# Supplementary material for: Evolution of PHAS loci in the young spike of Allohexaploid wheat
Source: BMC Genomics. 2020 Mar 4;21:200. doi: 10.1186/s12864-020-6582-4 (PMC7057497; doi:10.1186/s12864-020-6582-4)
Supplement: Supplementary file 10 — Additional file 10: Supplementary Table 2. The number and proportion of mapped 21- and 24-PHAS with scores greater than 30 for the AA, AABB and DD genomes. [file 12864_2020_6582_MOESM10_ESM.xlsx]

## Sheet: ST1
Supplementary Table 1. Identified 21-PHAS and 24-PHAS with phased scores greater than 15, 20, 25 and 30 in 261 small RNA samples.
Samples	Total Reads	Phased score >=15		Phased score >=20		Phased score >=25		Phased score >=30		Tissues	Annotation
		21-nt	24-nt	21-nt	24-nt	21-nt	24-nt	21-nt	24-nt
ERR2045633	34606419	49	5	42	2	40	2	33	1	leaves
ERR2045634	36220146	52	4	42	2	36	2	31	2	leaves
ERR2235347	3061251	1	0	0	0	0	0	0	0	spikelet
ERR2235348	1463188	0	0	0	0	0	0	0	0	spikelet
ERR2235349	2446419	0	0	0	0	0	0	0	0	spikelet
ERR2235350	4388506	14	63	12	17	9	6	6	4	spikelet
ERR2235351	3542602	13	25	12	6	12	5	7	1	spikelet
ERR2235352	4058312	13	31	11	14	10	5	9	2	spikelet
ERR2235353	3065992	5	0	5	0	3	0	2	0	rachis
ERR2235354	2286330	5	0	5	0	5	0	3	0	rachis
ERR2235355	2287835	5	0	5	0	3	0	2	0	rachis
ERR2235356	3088961	21	9	19	4	13	2	7	1	rachis
ERR2235357	3338699	24	11	19	5	17	2	15	1	rachis
ERR2235358	3649320	19	5	15	3	12	1	9	1	rachis
ERR2235359	2381346	5	0	2	0	2	0	1	0	spikelet
ERR2235360	2737963	10	1	5	0	2	0	0	0	spikelet
ERR2235361	2524119	5	0	0	0	0	0	0	0	spikelet
ERR2235362	3474993	16	52	11	19	10	5	7	5	spikelet
ERR2235363	4150689	14	74	10	28	9	14	3	5	spikelet
ERR2235364	3783930	17	36	15	16	13	5	9	1	spikelet
ERR2235365	3154143	9	3	7	1	7	0	5	0	rachis
ERR2235366	4959125	16	8	12	4	8	2	6	0	rachis
ERR2235367	3728083	9	3	6	2	4	0	4	0	rachis
ERR2235368	4124398	17	24	16	11	13	3	11	2	rachis
ERR2235369	3894516	20	14	18	5	12	3	10	1	rachis
ERR2235370	4561036	25	22	15	8	13	3	9	2	rachis
GSM803793	2916955	33	18	25	6	22	1	19	0	spike
GSM803794	2968383	28	0	21	0	18	0	18	0	spike
SRR017199	1540879	0	0	0	0	0	0	0	0	root, shoot, leaf, young spike
SRR101427	2417941	0	0	0	0	0	0	0	0	leaf
SRR101428	3062292	22	2	16	2	14	2	12	2	leaf
SRR101429	2112146	21	0	15	0	14	0	11	0	leaf
SRR101430	1039993	0	0	0	0	0	0	0	0	leaf
SRR101431	3712131	30	2	27	2	23	1	16	0	leaf
SRR101432	4104550	20	2	14	1	13	0	11	0	leaf
SRR1055291	5280147	13	2	10	2	10	2	9	1	7-day old whole seedling
SRR1055292	4725956	9	2	7	1	7	1	5	1	7-day old whole seedling
SRR1055293	3685120	9	3	7	1	6	1	5	0	7-day old whole seedling
SRR1055294	5262961	7	1	6	1	5	1	4	1	7-day old whole seedling
SRR1055295	6339618	28	5	22	2	19	2	19	2	7-day old whole seedling
SRR1055296	8966788	13	3	7	2	6	1	3	1	Leaf 50 days after planting
SRR1055297	7709548	15	238	14	130	11	72	11	47	Flower (spikelets) 50 days after planting
SRR1055298	1949153	21	2	21	2	18	1	14	1	7-day old whole seedling
SRR1195024	9765309	27	0	20	0	15	0	12	0	grains
SRR1195025	10622695	25	0	21	0	14	0	11	0	embryo of germinating seed embryos
SRR1195279	6729641	9	0	3	0	3	0	1	0	seedling shoot
SRR1195280	4732876	14	0	11	0	9	0	7	0	seedling leaf
SRR1195281	10689518	64	0	51	0	45	0	40	0	seedling root
SRR1195282	12970862	16	0	14	0	14	0	12	0	stems in the jointing stage
SRR1195944	13660393	8	0	8	0	7	0	7	0	0-5 mm young spikes
SRR1196022	14832219	5264	1	4919	0	4612	0	4318	0	10-15 mm young spikes
SRR1196023	8272120	51	0	43	0	38	0	35	0	flag leaves
SRR1196029	12628882	6	0	6	0	3	0	2	0	grain of 8 days after pollination
SRR1196045	15470356	26	0	22	0	18	0	15	0	grain of 15 days after pollination
SRR1222473	19789028	22	227	17	120	10	79	9	50	seed
SRR1222474	12232995	29	106	17	53	14	27	12	15	spike
SRR1222475	20587869	19	153	13	76	11	41	10	26	seed
SRR1222476	10722113	10	1	10	0	9	0	7	0	seedling
SRR1222477	12417415	18	1	15	1	12	0	10	0	seedling
SRR1222478	14096160	24	173	19	100	14	66	11	32	spike
SRR1222479	9417886	34	107	26	57	17	29	15	13	spike
SRR1222480	18493548	9	68	7	30	6	20	5	10	seed
SRR1222481	13453809	11	83	10	41	8	22	7	13	seed
SRR1222482	14054684	39	197	18	118	16	72	14	47	spike
SRR1222483	13017805	647	857	415	663	261	551	179	472	spike
SRR1222484	11909940	615	806	402	632	253	503	163	412	spike
SRR1222485	11058822	20	25	18	13	14	11	13	7	seed
SRR1581230	12794182	36	5	25	3	19	2	17	1	leave
SRR1581231	18640629	20	1	15	0	10	0	9	0	leave
SRR1646806	499791	0	0	0	0	0	0	0	0	leaf
SRR1646807	2785740	0	0	0	0	0	0	0	0	leaf
SRR1646808	4077450	0	0	0	0	0	0	0	0	leaf
SRR1646809	2491900	0	0	0	0	0	0	0	0	leaf
SRR1727004	9371329	5	0	3	0	3	0	2	0	leaf
SRR1728309	11271680	12	0	9	0	6	0	5	0	leaf
SRR1728566	9147276	2	1	2	1	1	0	1	0	leaf
SRR1728653	12220572	22	2	15	1	9	1	8	1	leaf
SRR1796319	19055824	7	364	5	239	4	173	3	120	grain
SRR1796320	16125454	17	25	11	10	10	3	9	1	grain
SRR1796321	34775127	16	3	12	2	9	1	7	1	grain
SRR1796322	12030112	10	2	9	1	6	0	4	0	grain
SRR2094492	1692549	30	0	23	0	20	0	16	0	flag leaf
SRR2094565	2927752	29	0	19	0	16	0	16	0	flag leaf
SRR2094566	3600568	22	0	19	0	16	0	12	0	flag leaf
SRR2094579	3731218	30	0	26	0	23	0	18	0	flag leaf
SRR2094580	3276383	27	0	24	0	20	0	18	0	flag leaf
SRR2094581	3043530	30	0	23	0	19	0	18	0	flag leaf
SRR2094584	5035439	28	0	24	0	22	0	17	0	flag leaf
SRR2094585	3784744	36	0	33	0	27	0	26	0	flag leaf
SRR2094586	4381551	29	0	22	0	19	0	15	0	flag leaf
SRR2094588	4018084	35	0	31	0	26	0	22	0	flag leaf
SRR2094590	3679780	32	0	29	0	24	0	21	0	flag leaf
SRR2094591	5223567	27	0	20	0	18	0	17	0	flag leaf
SRR2146991	17383378	0	0	0	0	0	0	0	0	Root
SRR2146992	16462101	0	0	0	0	0	0	0	0	Root
SRR3136704	29888174	0	0	0	0	0	0	0	0	Shoot
SRR3140846	13340930	11	0	6	0	2	0	2	0	callus
SRR3140978	8477927	9	0	5	0	3	0	2	0	callus
SRR3144511	12472470	8	0	6	0	5	0	2	0	wheat callus
SRR3144523	13527679	5	0	5	0	4	0	4	0	callus
SRR3144538	13098054	12	0	9	0	7	0	6	0	callus
SRR3144539	10823644	14	0	9	0	7	0	3	0	callus
SRR3151437	8629052	17	50	13	22	11	8	8	3	grain
SRR3151438	8655502	23	95	18	49	16	31	14	19	grain
SRR3151439	5602004	11	1	8	0	6	0	3	0	grain
SRR3151440	12613596	19	9	12	3	7	2	4	1	grain
SRR3151441	7554433	14	1	7	1	5	1	5	1	grain
SRR3151442	5981042	13	3	7	1	6	1	5	1	grain
SRR3151443	9298396	14	131	11	67	7	35	4	27	grain
SRR3151444	9074787	15	58	11	24	8	13	4	5	grain
SRR3151445	5765473	4	0	2	0	1	0	1	0	grain
SRR3151446	8679311	12	0	5	0	3	0	3	0	grain
SRR3151447	5664121	6	0	5	0	5	0	4	0	grain
SRR3151448	5641664	9	1	6	1	4	1	4	1	grain
SRR3690677	22602943	4690	1975	4262	1742	3920	1572	3601	1421	young spike	control
SRR3690678	20340751	4724	1717	4341	1507	3986	1348	3659	1203	young spike	control
SRR3690679	22091687	4931	1380	4596	1248	4274	1146	3996	1052	young spike	cold stress
SRR3690680	22671996	5117	1487	4748	1332	4425	1213	4101	1122	young spike	cold stress
SRR3721341	7594902	47	1	38	1	33	1	26	1	Leaf tissues
SRR3721342	4647440	20	2	16	2	14	2	13	1	Leaf tissues
SRR3721343	6938541	46	2	36	1	27	1	25	1	Leaf tissues
SRR3721344	7169947	42	1	34	1	25	1	22	1	Leaf tissues
SRR3721345	6366870	44	1	31	1	24	1	22	1	Leaf tissues
SRR3721346	6033770	20	1	18	1	16	1	13	1	Leaf tissues
SRR3721347	6207280	38	1	32	1	24	1	22	1	Leaf tissues
SRR3721348	7235376	41	1	29	1	21	1	18	1	Leaf tissues
SRR3721349	4703188	39	1	33	1	29	1	22	1	Leaf tissues
SRR3721350	6280666	23	1	18	1	17	1	16	0	Leaf tissues
SRR3721351	7067227	57	1	43	1	38	1	29	1	Leaf tissues
SRR3721352	7319181	45	1	34	1	27	1	23	1	Leaf tissues
SRR3721353	3863609	34	1	26	1	21	1	18	0	Leaf tissues
SRR3721354	5361607	26	1	18	1	15	1	15	1	Leaf tissues
SRR3721355	5104172	38	1	30	1	24	1	21	1	Leaf tissues
SRR3721356	4489076	31	1	26	1	20	1	18	1	Leaf tissues
SRR3721357	7615116	37	1	30	1	24	1	22	1	Leaf tissues
SRR3721358	6103004	34	2	23	2	21	2	16	1	Leaf tissues
SRR3721359	6919961	36	1	29	1	23	1	19	1	Leaf tissues
SRR3721360	6768745	43	1	36	1	26	1	21	1	Leaf tissues
SRR3721361	5927146	50	1	39	1	33	1	29	1	Leaf tissues
SRR3721362	4534999	19	1	14	1	14	0	13	0	Leaf tissues
SRR3721363	3488388	24	1	22	1	19	1	18	1	Leaf tissues
SRR3721364	5415684	40	2	31	2	21	2	17	2	Leaf tissues
SRR3721365	8162301	49	1	41	1	36	1	29	1	Leaf tissues
SRR3721366	5945927	38	1	27	1	24	1	22	1	Leaf tissues
SRR3721367	6944890	42	1	35	1	27	1	26	1	Leaf tissues
SRR3721368	6662093	50	1	38	1	30	1	26	1	Leaf tissues
SRR3721369	7811704	45	1	37	1	27	1	25	1	Leaf tissues
SRR3721370	5021759	36	2	27	2	23	2	19	2	Leaf tissues
SRR3721371	6241691	47	1	34	1	29	1	23	1	Leaf tissues
SRR3721372	4776025	32	1	24	1	21	1	20	0	Leaf tissues
SRR3721373	6507864	42	2	35	2	30	2	24	2	Leaf tissues
SRR3721374	4583309	34	2	31	2	26	2	22	1	Leaf tissues
SRR3721375	6494204	49	1	40	1	31	1	24	1	Leaf tissues
SRR3721376	6102292	41	1	31	1	24	1	22	1	Leaf tissues
SRR3721377	7603586	45	1	36	1	25	1	20	1	Leaf tissues
SRR3721378	5926926	28	2	26	2	22	2	18	0	Leaf tissues
SRR3721379	6194301	47	2	37	1	30	1	26	1	Leaf tissues
SRR3721380	6538272	43	2	31	2	24	2	22	2	Leaf tissues
SRR3721381	7275746	53	1	42	1	35	1	28	1	Leaf tissues
SRR3721382	6521659	41	1	32	1	23	1	22	1	Leaf tissues
SRR3721383	6300288	41	1	30	1	24	1	18	1	Leaf tissues
SRR3721384	7556657	47	1	36	1	27	1	23	1	Leaf tissues
SRR3721385	7793485	45	1	40	1	37	1	28	1	Leaf tissues
SRR3721386	7355353	34	2	27	2	23	2	20	1	Leaf tissues
SRR3721387	6942490	40	1	37	1	24	1	18	1	Leaf tissues
SRR3721388	7513013	43	2	35	2	31	2	26	2	Leaf tissues
SRR3721389	9737999	44	1	33	1	24	1	18	1	Leaf tissues
SRR3721390	7677024	33	2	24	2	17	2	16	2	Leaf tissues
SRR3721391	9943089	51	1	42	1	36	1	29	1	Leaf tissues
SRR3721392	7981232	46	1	34	1	25	1	21	1	Leaf tissues
SRR3721393	7104427	44	1	34	1	28	1	24	1	Leaf tissues
SRR3721394	6815509	42	2	35	2	28	2	23	2	Leaf tissues
SRR3721395	10231056	50	1	38	1	27	1	26	1	Leaf tissues
SRR3721396	7939189	41	1	30	1	21	1	20	1	Leaf tissues
SRR3721397	9484361	49	1	40	1	35	1	24	1	Leaf tissues
SRR3721398	7246907	37	2	30	2	24	2	19	2	Leaf tissues
SRR3721399	7206989	42	1	31	1	22	1	18	1	Leaf tissues
SRR3721400	6891138	34	1	27	1	19	1	16	1	Leaf tissues
SRR3721401	9236174	41	1	30	1	24	1	20	1	Leaf tissues
SRR3721402	8849861	33	2	28	2	23	2	22	2	Leaf tissues
SRR3721403	7800867	45	3	33	2	28	2	23	2	Leaf tissues
SRR3721404	7449008	44	2	29	2	23	2	21	2	Leaf tissues
SRR3721405	9562424	58	2	46	2	37	1	31	1	Leaf tissues
SRR3721406	7714159	37	2	25	2	22	2	19	2	Leaf tissues
SRR3721407	9035368	46	2	38	2	30	2	24	2	Leaf tissues
SRR3721408	6987441	42	2	34	2	26	2	17	2	Leaf tissues
SRR3721409	8660757	40	1	31	1	22	1	18	1	Leaf tissues
SRR3721410	8180349	44	2	33	2	25	2	19	2	Leaf tissues
SRR3721411	9124206	42	1	32	1	23	1	20	1	Leaf tissues
SRR3721412	9939554	46	1	34	1	29	1	24	1	Leaf tissues
SRR4114471	14724348	19	2	16	2	12	2	10	1	Leaf sheath
SRR4114472	13182271	19	2	15	2	11	2	7	2	Leaf sheath
SRR4114473	11066518	20	1	17	1	12	1	11	1	Leaf sheath
SRR4114475	11632838	39	189	22	117	17	78	13	51	Leaf sheath
SRR4114476	13072535	17	1	14	1	12	1	8	1	Leaf sheath
SRR4114477	7917433	14	2	11	2	8	2	4	1	Leaf sheath
SRR4114478	12429238	9	3	6	2	4	1	3	1	Leaf sheath
SRR4114479	6307443	12	1	10	1	8	1	7	1	Leaf sheath
SRR4114480	13868828	25	1	19	1	16	1	14	1	Leaf sheath
SRR4417222	17386091	18	0	11	0	9	0	6	0	Seed
SRR4417223	13721387	19	0	13	0	9	0	7	0	Seed
SRR4417224	16925569	15	0	10	0	8	0	7	0	Seed
SRR4417225	15058445	20	0	13	0	10	0	8	0	Seed
SRR4417226	16013243	18	1	15	0	11	0	6	0	Seed
SRR4417227	15995192	13	0	9	0	7	0	7	0	Seed
SRR4417228	16339404	11	0	7	0	7	0	5	0	Seed
SRR4417229	15203051	12	0	7	0	6	0	6	0	Seed
SRR4417230	9903163	20	0	15	0	10	0	6	0	Seed
SRR4417231	10545505	19	0	15	0	12	0	7	0	Seed
SRR4417232	9954526	18	0	13	0	10	0	8	0	Seed
SRR4417233	14901520	14	0	9	0	9	0	6	0	Seed
SRR449364	12078472	3272	1836	2831	1638	2466	1469	2159	1323	spike tissue	1.0mm anther
SRR449365	10942443	1487	1515	1098	1297	828	1162	646	1037	spike tissue	1.5mm anther (FHM)
SRR449366	12196705	2314	1629	1894	1447	1550	1298	1263	1176	spike tissue	2.2mm anther (MIT)
SRR449367	11825911	2068	1516	1668	1330	1344	1184	1101	1070	spike tissue	3mm anther (MP)
SRR449368	8277174	1949	1254	1563	1094	1232	974	1017	854	spike tissue
SRR449369	12546470	1754	1541	1349	1357	1038	1197	846	1085	spike tissue
SRR449370	10554926	1753	1389	1392	1207	1076	1052	853	963	spike tissue
SRR5096869	25325534	40	2	34	1	33	1	25	1	Leaf 30D
SRR5096872	28175558	44	2	33	1	30	1	28	1	Leaf 30D
SRR5096890	34044784	52	4	43	3	37	2	30	2	Leaf 30D
SRR5096892	27084813	48	1	39	1	33	1	29	1	Leaf 30D
SRR5270343	28456587	38	3	31	2	25	2	21	2	First expanded leaf
SRR5270344	37528593	42	2	35	2	31	2	21	2	First expanded leaf
SRR5270345	24347078	38	3	28	2	24	2	20	2	First expanded leaf
SRR5270346	25315421	43	3	36	3	28	2	26	2	First expanded leaf
SRR5270347	15554124	33	2	24	2	19	2	16	2	First expanded leaf
SRR5270348	11328213	29	3	24	1	17	1	15	1	First expanded leaf
SRR5270349	12198163	27	5	21	2	16	2	13	2	First expanded leaf
SRR5270350	11978071	29	2	20	1	15	1	12	1	First expanded leaf
SRR5381542	12760318	2871	1912	2339	1686	1907	1507	1524	1372	anther
SRR5381543	13591041	2348	1706	1854	1475	1451	1322	1134	1198	anther
SRR5460930	13802060	4	0	4	0	3	0	3	0	Spike	DR
SRR5460939	16988569	6	1	6	0	4	0	4	0	Spike	DR
SRR5460941	16648471	6	0	5	0	5	0	4	0	Spike	FM
SRR5460949	16497116	6	0	5	0	3	0	3	0	Spike	FM
SRR5460967	19167085	6244	2473	5709	2314	5251	2198	4802	2098	Spike	AM
SRR5460972	17688342	3862	2355	3187	2211	2631	2099	2151	1991	Spike	AM
SRR5461176	13538472	5920	2980	5417	2706	4958	2484	4488	2274	Spike	TS
SRR5461177	14228433	5756	2982	5228	2715	4706	2492	4275	2299	Spike	TS
SRR5816454	25892289	7	0	5	0	4	0	3	0	root
SRR6328644	7587524	2	0	1	0	0	0	0	0	root
SRR6328645	9051413	1	0	1	0	1	0	1	0	root
SRR6328646	8390495	8	1	5	0	4	0	1	0	root
SRR6328647	10242089	3	0	3	0	1	0	0	0	root
SRR6328648	7864461	3	0	2	0	2	0	1	0	root
SRR6328649	14864769	4	0	3	0	3	0	3	0	root
SRR6328650	7574948	1	0	1	0	1	0	0	0	root
SRR6328651	9945243	5	0	2	0	1	0	1	0	root
SRR6328652	9350662	1	0	1	0	0	0	0	0	root
SRR800157	70383870	5	16	4	10	4	5	3	5	HD2985_control
SRR800158	59571100	11	4	9	3	6	2	3	1	HD2985_treated
SRR8432572	6758246	8	4	5	1	4	0	4	0	spikelet
SRR8432573	8851548	5	0	4	0	3	0	2	0	spikelet
SRR8432587	8214850	3	0	2	0	1	0	0	0	spikelet
SRR8432590	8041566	6	1	3	0	3	0	3	0	spikelet
SRR974912	13946734	53	4	41	4	33	3	29	3	flag leaf
SRR974913	14781969	12	475	10	294	8	202	4	136	seed
SRR974914	14744811	8	210	6	113	5	69	4	39	seed
SRR974915	18524473	26	127	19	63	16	31	15	22	seed
SRR975066	14340768	30	3	23	2	18	2	14	2	seedlings

## Sheet: ST2
Supplementary Table 2. The number and proportion of mapped 21- and 24-PHAS with scores greater than 30 for the AA, AABB and DD genomes.
	21-PHAS			24-PHAS
	AA (%)	AABB (%)	DD (%)	AA (%)	AABB (%)	DD (%)
AM (SRR5460972)	503 (23.38)	1349 (62.72)	819 (38.08)	370 (18.58)	1070 (53.74)	581 (29.18)
TS (SRR5461176)	1107 (24.67)	2752 (61.32)	1695 (37.77)	512 (22.52)	1227 (53.96)	736 (32.37)
FHM (SRR449365)	148 (22.91)	393 (60.83)	285 (44.12)	271 (26.13)	602 (58.05)	388 (37.42)
MIT (SRR449366)	311 (24.62)	782 (61.92)	523 (41.41)	293 (24.91)	671 (57.06)	425 (36.14)
MP (SRR449367)	286 (25.98)	686 (62.31)	463 (42.05)	264 (24.67)	606 (56.64)	394 (36.82)
%, proportion of mapped 21- or 24-PHAS from total of 21- or 24-PHAS in AABBDD genome.

## Sheet: ST3
Supplementary Table 3. The predicted target in AM with a score less than four, as determined by the Targetfinder program.
PHAS Loci (+/- strand)	Targetsite Regions	Target Score	miRNA name in miRbase	miRNA length	Target sequences	Base pairs	miRNA sequences
chr1D:415620976-415621409(+)	363-385	4	mes-miR2118/	22	UCGAAAUAGGUGGCAUCGGGAAC	: ::::: :::::::: ::::::	AUCUUUACCCACCGUA-CCCUUG
chr2D:351389781-351390401(-)	529-551	3.5	mes-miR2118/	22	UAGGAAUAGGUGGCAUCGGGAAC	:::.::: :::::::: ::::::	AUCUUUACCCACCGUA-CCCUUG
chr3B:775709168-775709792(-)	533-555	3.5	mes-miR2118/	22	UAGGAUUGGGUGGCAUUGGGAAC	:::.: :::::::::: ::::::	AUCUUUACCCACCGUA-CCCUUG
chr6A:17660956-17661664(+)	380-399	3.5	hbr-miR2118/	21	UUGCUCCU-UCCACCCAUUUC	:..::::. ::::::::::::	AGUGAGGGUAGGUGGGUAAAG
chr1A:494189370-494189951(-)	462-483	3	bdi-miR2118a/	22	UUGGAAUGGGAGGCAUCAGAAA	: ::::::::::::::: ::::	AUCCUUACCCUCCGUAGCCUUU
chr1A:494189370-494189951(-)	463-483	3	osa-miR2118a/	22	UUGGAAUGGGAGGCAUC-AGAA	: ::::::::::::::: ::::	AUCCUUACCCUCCGUAGCUCUU
chr1A:514596843-514597526(-)	616-637	2.5	bdi-miR2118a/	22	UAGGAGUGGGAAGCAUCGGAAA	:::::.::::: ::::::::::	AUCCUUACCCUCCGUAGCCUUU
chr1A:534413893-534415075(+)	1092-1113	3	ata-miR2118a-5p/	22	UUGGAAUGAGAGACAUUGGGAA	: :::::: ::::::::.::::	AUCCUUACCCUCUGUAAUCCUU
chr1A:534432641-534433347(+)	616-637	3	ata-miR2118a-5p/	22	UUGGAAUGAGAGACAUUGGGAA	: :::::: ::::::::.::::	AUCCUUACCCUCUGUAAUCCUU
chr1B:21331620-21332280(+)	572-593	4	ata-miR2118a-5p/	22	UAGGCUUGGGAGGCAUUAGGAC	:::: ::::::.::::::::	AUCCUUACCCUCUGUAAUCCUU
chr1B:31311553-31312362(+)	700-721	2	ata-miR2118a-5p/	22	UAGGAAUGGGAAACAUUAGGAA	::::::::::: ::::::::::	AUCCUUACCCUCUGUAAUCCUU
chr1B:40601325-40601840(+)	427-448	4	osa-miR2118a/	22	UAAGCUUGGGAGGCAUCGAGGA	:: : ::::::::::::::.:	AUCCUUACCCUCCGUAGCUCUU
chr1B:564291121-564291851(-)	621-642	3	bdi-miR2118a/	22	UGGGAGUAGGAGGCAUUGGAAA	:.:::.: ::::::::.:::::	AUCCUUACCCUCCGUAGCCUUU
chr1B:564445877-564446331(-)	364-385	3	bdi-miR2118a/	22	UGGGAGUAGGAGGCAUUGGAAA	:.:::.: ::::::::.:::::	AUCCUUACCCUCCGUAGCCUUU
chr1B:565929271-565929994(+)	656-677	3.5	osa-miR2118a/	22	UGGGAAUGAGAUGCAUCGAGAA	:.:::::: :: ::::::::::	AUCCUUACCCUCCGUAGCUCUU
chr1B:566022243-566022863(+)	530-551	3.5	osa-miR2118a/	22	GGGGAAUGGGAGGCAUCAAGAA	.::::::::::::::: ::::	AUCCUUACCCUCCGUAGCUCUU
chr1B:592240404-592241046(-)	552-573	3.5	ata-miR2118a-5p/	22	UCGGGAUGUGAGACAUUGGGAA	: ::.::: ::::::::.::::	AUCCUUACCCUCUGUAAUCCUU
chr1B:592330533-592331164(-)	540-561	3.5	ata-miR2118a-5p/	22	UCGGGAUGUGAGACAUUGGGAA	: ::.::: ::::::::.::::	AUCCUUACCCUCUGUAAUCCUU
chr1B:593054737-593055411(+)	584-605	3.5	ata-miR2118a-5p/	22	UGGGAUUGAGAGACAUUGGGAA	:.::: :: ::::::::.::::	AUCCUUACCCUCUGUAAUCCUU
chr1B:612938583-612939226(-)	595-616	4	ata-miR2118a-5p/	22	CAGGAUUUGGAGACGUUAGGAA	:::: : ::::::.:::::::	AUCCUUACCCUCUGUAAUCCUU
chr1B:666289892-666290554(-)	637-658	4	bdi-miR2118a/	22	UAGGUAUGGGAGGCAUAGGGAA	:::: ::::::::::: ::.::	AUCCUUACCCUCCGUAGCCUUU
chr1B:666289892-666290554(-)	637-658	4	osa-miR2118a/	22	UAGGUAUGGGAGGCAUAGGGAA	:::: ::::::::::: :.:::	AUCCUUACCCUCCGUAGCUCUU
chr1D:416093898-416094887(+)	880-901	4	ata-miR2118a-5p/	22	UGGGAAUGGGAUGCAUUAGGAG	:.::::::::: .::::::::.	AUCCUUACCCUCUGUAAUCCUU
chr1D:417624094-417624841(-)	657-678	3	bdi-miR2118a/	22	UGGGAGUAGGAGGCAUUGGAAA	:.:::.: ::::::::.:::::	AUCCUUACCCUCCGUAGCCUUU
chr1D:417768932-417769426(-)	385-406	3	bdi-miR2118a/	22	UGGGAGUAGGAGGCAUUGGAAA	:.:::.: ::::::::.:::::	AUCCUUACCCUCCGUAGCCUUU
chr1D:417784312-417785025(-)	623-644	2.5	bdi-miR2118a/	22	UAGGAGUGGGAAGCAUCGGAAA	:::::.::::: ::::::::::	AUCCUUACCCUCCGUAGCCUUU
chr1D:436979148-436979852(-)	637-658	4	ata-miR2118a-5p/	22	UAGGAAUGGGCGGCAUUGGGAA	:::::::::: :.::::.::::	AUCCUUACCCUCUGUAAUCCUU
chr1D:436979148-436979852(-)	637-658	4	bdi-miR2118a/	22	UAGGAAUGGGCGGCAUUGGGAA	:::::::::: :::::.::.::	AUCCUUACCCUCCGUAGCCUUU
chr1D:436979148-436979852(-)	637-658	4	osa-miR2118a/	22	UAGGAAUGGGCGGCAUUGGGAA	:::::::::: :::::.:.:::	AUCCUUACCCUCCGUAGCUCUU
chr1D:437547057-437547676(+)	531-552	4	ata-miR2118a-5p/	22	UUGGAAUGAGAGGCAUUGGGAA	: :::::: :::.::::.::::	AUCCUUACCCUCUGUAAUCCUU
chr1D:437547057-437547676(+)	531-552	4	bdi-miR2118a/	22	UUGGAAUGAGAGGCAUUGGGAA	: :::::: :::::::.::.::	AUCCUUACCCUCCGUAGCCUUU
chr1D:437547057-437547676(+)	531-552	4	osa-miR2118a/	22	UUGGAAUGAGAGGCAUUGGGAA	: :::::: :::::::.:.:::	AUCCUUACCCUCCGUAGCUCUU
chr1D:438028805-438029449(+)	554-575	4	ata-miR2118a-5p/	22	UAGGAACGAGAGGCAUUGGGAA	:::::: : :::.::::.::::	AUCCUUACCCUCUGUAAUCCUU
chr1D:438028805-438029449(+)	554-575	4	bdi-miR2118a/	22	UAGGAACGAGAGGCAUUGGGAA	:::::: : :::::::.::.::	AUCCUUACCCUCCGUAGCCUUU
chr1D:438028805-438029449(+)	554-575	4	osa-miR2118a/	22	UAGGAACGAGAGGCAUUGGGAA	:::::: : :::::::.:.:::	AUCCUUACCCUCCGUAGCUCUU
chr1D:441287806-441288529(-)	635-656	4	bdi-miR2118a/	22	UAGGAAUGGGAGGAAUCCGAAA	::::::::::::: ::: ::::	AUCCUUACCCUCCGUAGCCUUU
chr1D:447282136-447282676(-)	452-473	3	osa-miR2118a/	22	UAGGAUUUAGAGGCAUCGAGAA	::::: : :::::::::::::	AUCCUUACCCUCCGUAGCUCUU
chr1D:447518803-447519487(-)	596-617	4	ata-miR2118a-5p/	22	CAGGAUUUGGAGACGUUAGGAA	:::: : ::::::.:::::::	AUCCUUACCCUCUGUAAUCCUU
chr2A:46095987-46096568(-)	472-493	4	osa-miR2118a/	22	UAGGCUUGGGAGGCAACGAGAA	:::: ::::::::: ::::::	AUCCUUACCCUCCGUAGCUCUU
chr2A:733130152-733130648(-)	406-427	4	bdi-miR2118a/	22	UAGGAAUGGGAGGUGUCGGGAU	:::::::::::::..::::.:	AUCCUUACCCUCCGUAGCCUUU
chr2A:733130152-733130648(-)	406-427	4	osa-miR2118a/	22	UAGGAAUGGGAGGUGUCGGGAU	:::::::::::::..:::.::	AUCCUUACCCUCCGUAGCUCUU
chr2B:2697037-2697599(+)	472-493	4	ata-miR2118a-5p/	22	UAGGAACGAGAGGUAUUAGGAA	:::::: : :::..::::::::	AUCCUUACCCUCUGUAAUCCUU
chr2B:31504014-31504884(+)	803-824	4	ata-miR2118a-5p/	22	UAGGACUGAGAGAUAUUGGGAA	::::: :: ::::.:::.::::	AUCCUUACCCUCUGUAAUCCUU
chr2B:647711577-647712262(-)	595-616	4	ata-miR2118a-5p/	22	UUGGAUUUGGAGGCAUUAGGAA	: ::: : ::::.:::::::::	AUCCUUACCCUCUGUAAUCCUU
chr2B:690599585-690600207(+)	532-553	3.5	bdi-miR2118a/	22	UAAGAGUAGGAGGCAUCGGGAA	:: ::.: :::::::::::.::	AUCCUUACCCUCCGUAGCCUUU
chr2B:690599585-690600207(+)	532-553	3.5	osa-miR2118a/	22	UAAGAGUAGGAGGCAUCGGGAA	:: ::.: ::::::::::.:::	AUCCUUACCCUCCGUAGCUCUU
chr2B:690674866-690675593(+)	658-679	3	ata-miR2118a-5p/	22	UAAGAAUAGGAGACAUUGGGAA	:: :::: :::::::::.::::	AUCCUUACCCUCUGUAAUCCUU
chr2D:17043958-17044744(-)	697-719	3	bdi-miR2118a/	22	UAUGAAUGGGAGGCAUGCGGAAA	:: ::::::::::::: ::::::	AUCCUUACCCUCCGUA-GCCUUU
chr2D:20673791-20674472(-)	593-614	4	bdi-miR2118a/	22	UGGGGUUAGGAGGCAUCGGGAA	:.::. : :::::::::::.::	AUCCUUACCCUCCGUAGCCUUU
chr2D:20673791-20674472(-)	593-614	4	osa-miR2118a/	22	UGGGGUUAGGAGGCAUCGGGAA	:.::. : ::::::::::.:::	AUCCUUACCCUCCGUAGCUCUU
chr2D:21426356-21426889(-)	446-467	4	ata-miR2118a-5p/	22	UAGGACUGAGAGGCGUUAGGAA	::::: :: :::.:.:::::::	AUCCUUACCCUCUGUAAUCCUU
chr2D:351389781-351390401(-)	530-551	3	aof-miR2118a/	22	UAGGAAUAGGUGGCAUCGGGAA	:::: :::::::::::::::	UUCCUAAUCCACCGUAGCCCUC
chr2D:351389781-351390401(-)	530-551	4	bdi-miR2118a/	22	UAGGAAUAGGUGGCAUCGGGAA	::::::: :: ::::::::.::	AUCCUUACCCUCCGUAGCCUUU
chr2D:351389781-351390401(-)	530-551	4	osa-miR2118a/	22	UAGGAAUAGGUGGCAUCGGGAA	::::::: :: :::::::.:::	AUCCUUACCCUCCGUAGCUCUU
chr2D:450395393-450395933(-)	163-184	4	gma-miR2118a-5p/gma-miR2118b-5p/	22	CCAUACCAACCCUCUCAUCUCC	: :::: ::::::.:::::::	GAAAUGGCUGGGAGGGUAGAGG
chr2D:542365615-542366296(-)	591-612	4	bdi-miR2118a/	22	UAGGAAUGGGAUGUAUUGGAAA	::::::::::: :.::.:::::	AUCCUUACCCUCCGUAGCCUUU
chr2D:6932604-6933353(-)	659-680	4	ata-miR2118a-5p/	22	UAGGAACGAGAGGUAUUAGGAA	:::::: : :::..::::::::	AUCCUUACCCUCUGUAAUCCUU
chr2D:6948036-6948679(-)	553-574	4	ata-miR2118a-5p/	22	UAGGAACGAGAGGUAUUAGGAA	:::::: : :::..::::::::	AUCCUUACCCUCUGUAAUCCUU
chr2D:91233074-91233757(+)	574-595	3	ata-miR2118a-5p/	22	UAGAAAUGGGAGAUAUUGGGAA	::: :::::::::.:::.::::	AUCCUUACCCUCUGUAAUCCUU
chr3A:27500666-27501317(+)	582-603	4	ata-miR2118a-5p/	22	UAGGAACAAGAGACAUUGGGAA	:::::: ::::::::.::::	AUCCUUACCCUCUGUAAUCCUU
chr3A:27853925-27854569(-)	575-596	3.5	bdi-miR2118a/	22	UAGGAGUUGGAGGCAUCAGAAA	:::::.: ::::::::: ::::	AUCCUUACCCUCCGUAGCCUUU
chr3A:27853925-27854569(-)	576-596	3.5	osa-miR2118a/	22	UAGGAGUUGGAGGCAUC-AGAA	:::::.: ::::::::: ::::	AUCCUUACCCUCCGUAGCUCUU
chr3A:32878100-32878992(+)	845-866	4	ata-miR2118a-5p/	22	UAGGAAGAGGAGACAUCAGGAA	:::::: :::::::: :::::	AUCCUUACCCUCUGUAAUCCUU
chr3A:646288418-646288952(+)	446-467	4	ata-miR2118a-5p/	22	UAGGAAUAGGAGGCAUUGGGGA	::::::: ::::.::::.::.:	AUCCUUACCCUCUGUAAUCCUU
chr3A:646288418-646288952(+)	446-467	4	bdi-miR2118a/	22	UAGGAAUAGGAGGCAUUGGGGA	::::::: ::::::::.::..:	AUCCUUACCCUCCGUAGCCUUU
chr3A:646288418-646288952(+)	446-467	4	osa-miR2118a/	22	UAGGAAUAGGAGGCAUUGGGGA	::::::: ::::::::.:.:.:	AUCCUUACCCUCCGUAGCUCUU
chr3A:692423-693066(-)	553-574	4	osa-miR2118a/	22	UAGGCCUGGGAGGCAUCAAGAA	:::: ::::::::::: ::::	AUCCUUACCCUCCGUAGCUCUU
chr3A:706117639-706118319(+)	591-613	4	ata-miR2118a-5p/	22	UAGGAAUCGGAGGCAUAUAGGAA	::::::: ::::.::: ::::::	AUCCUUACCCUCUGUA-AUCCUU
chr3A:706445467-706446087(+)	552-574	4	bdi-miR2118a/	22	UAUGAAUGGGAGGCAUAUGGAAA	:: ::::::::::::: .:::::	AUCCUUACCCUCCGUA-GCCUUU
chr3A:706769372-706770095(+)	634-656	4	bdi-miR2118a/	22	UAUGAAUGGGAGGCAUACGGAGA	:: ::::::::::::: ::::.:	AUCCUUACCCUCCGUA-GCCUUU
chr3A:710261365-710262163(-)	708-729	3.5	ata-miR2118a-5p/	22	UAGGAAUGUGAGACAUCAGGAG	:::::::: ::::::: ::::.	AUCCUUACCCUCUGUAAUCCUU
chr3A:886219-886860(-)	551-572	4	osa-miR2118a/	22	UAGGCUUGGGAGGCAUCAAGAA	:::: ::::::::::: ::::	AUCCUUACCCUCCGUAGCUCUU
chr3A:952743-953531(-)	679-700	4	osa-miR2118a/	22	UAGGCCUGGGAGGCAUCAAGAA	:::: ::::::::::: ::::	AUCCUUACCCUCCGUAGCUCUU
chr3B:20089878-20090749(-)	806-826	4	osa-miR2118a/	22	GAGGAAUGAGAGGCAUC-AGAA	::::::: :::::::: ::::	AUCCUUACCCUCCGUAGCUCUU
chr3B:32471024-32471696(-)	563-584	1.5	bdi-miR2118a/	22	UAGGAGUUGGAGGCAUCGGAAA	:::::.: ::::::::::::::	AUCCUUACCCUCCGUAGCCUUU
chr3B:34115749-34116236(-)	258-279	4	bdi-miR2118a/	22	UAGGAGUAGGAGGCAUCGGUAG	:::::.: ::::::::::: :.	AUCCUUACCCUCCGUAGCCUUU
chr3B:42346092-42346839(+)	657-678	4	bdi-miR2118a/	22	UAGGCUCGGGAGGCAUCGGGAA	:::: ::::::::::::.::	AUCCUUACCCUCCGUAGCCUUU
chr3B:42346092-42346839(+)	657-678	4	osa-miR2118a/	22	UAGGCUCGGGAGGCAUCGGGAA	:::: :::::::::::.:::	AUCCUUACCCUCCGUAGCUCUU
chr3B:684051112-684051985(-)	783-804	4	bdi-miR2118a/	22	UAGAAUUAGGAGGCAUCGGGAA	::: : : :::::::::::.::	AUCCUUACCCUCCGUAGCCUUU
chr3B:684051112-684051985(-)	783-804	4	osa-miR2118a/	22	UAGAAUUAGGAGGCAUCGGGAA	::: : : ::::::::::.:::	AUCCUUACCCUCCGUAGCUCUU
chr3B:684064018-684064803(-)	657-678	4	bdi-miR2118a/	22	UAGGAUUGCGAGGCGUCGGGAA	::::: :: :::::.::::.::	AUCCUUACCCUCCGUAGCCUUU
chr3B:684064018-684064803(-)	657-678	4	osa-miR2118a/	22	UAGGAUUGCGAGGCGUCGGGAA	::::: :: :::::.:::.:::	AUCCUUACCCUCCGUAGCUCUU
chr3B:684104178-684105109(-)	841-862	4	bdi-miR2118a/	22	UAGGACUGUGAGGCGUCGGGAA	::::: :: :::::.::::.::	AUCCUUACCCUCCGUAGCCUUU
chr3B:684104178-684105109(-)	841-862	4	osa-miR2118a/	22	UAGGACUGUGAGGCGUCGGGAA	::::: :: :::::.:::.:::	AUCCUUACCCUCCGUAGCUCUU
chr3B:759126863-759127502(-)	551-572	4	bdi-miR2118a/	22	UUGGAAUAGAAGGCAUCGGAAA	: ::::: : ::::::::::::	AUCCUUACCCUCCGUAGCCUUU
chr3B:760404881-760405504(+)	531-552	4	bdi-miR2118a/	22	UGGGAGUAGGAGGCAUCUGAAA	:.:::.: ::::::::: ::::	AUCCUUACCCUCCGUAGCCUUU
chr3B:760446681-760447362(+)	614-635	4	ata-miR2118a-5p/	22	UUGGAAUGGGAGGUGUUAGGAA	: ::::::::::...:::::::	AUCCUUACCCUCUGUAAUCCUU
chr3B:760490351-760491097(-)	657-679	4	bdi-miR2118a/	22	UAUGAAUGGAAGGCAUACGGAAA	:: :::::: :::::: ::::::	AUCCUUACCCUCCGUA-GCCUUU
chr3B:761063023-761063687(+)	573-595	4	bdi-miR2118a/	22	UAUGAAUGGGAGGCAUAUGGAAA	:: ::::::::::::: .:::::	AUCCUUACCCUCCGUA-GCCUUU
chr3B:761491387-761492219(+)	741-763	4	bdi-miR2118a/	22	UACGAAUGGGAGGCAUGUGGAAA	:: ::::::::::::: .:::::	AUCCUUACCCUCCGUA-GCCUUU
chr3B:762160492-762161094(+)	467-488	3.5	ata-miR2118a-5p/	22	UGGGAAUGAGACACAUUAGGAA	:.:::::: :: ::::::::::	AUCCUUACCCUCUGUAAUCCUU
chr3B:762831487-762832240(+)	664-686	3.5	ata-miR2118a-5p/	22	UGGGAAUGGGAGGCAUUAAGGAA	:.::::::::::.::::: ::::	AUCCUUACCCUCUGUAAU-CCUU
chr3B:763068441-763069059(+)	508-530	4	bdi-miR2118a/	22	UGUGAAUGGGAGGCAUUCGGAAG	:. ::::::::::::: :::::.	AUCCUUACCCUCCGUA-GCCUUU
chr3B:764185717-764186234(+)	448-469	4	ata-miR2118a-5p/	22	UGGGAAUAGGAGACAUCAGGAG	:.::::: :::::::: ::::.	AUCCUUACCCUCUGUAAUCCUU
chr3B:764426243-764426756(+)	425-446	4	ata-miR2118a-5p/	22	UGGGAAUAGGAGACAUCAGGAG	:.::::: :::::::: ::::.	AUCCUUACCCUCUGUAAUCCUU
chr3B:775632135-775632608(-)	383-404	2	osa-miR2118a/	22	UGGGAGUUGGAGGCAUCGAGAA	:.:::.: ::::::::::::::	AUCCUUACCCUCCGUAGCUCUU
chr3B:775709168-775709792(-)	534-555	3.5	aof-miR2118a/	22	UAGGAUUGGGUGGCAUUGGGAA	::::::.::::::::.::::	UUCCUAAUCCACCGUAGCCCUC
chr3D:20035192-20035811(-)	519-540	3	bdi-miR2118a/	22	UAGGAAUUGGAGGCAUCAGAAA	::::::: ::::::::: ::::	AUCCUUACCCUCCGUAGCCUUU
chr3D:20035192-20035811(-)	520-540	3	osa-miR2118a/	22	UAGGAAUUGGAGGCAUC-AGAA	::::::: ::::::::: ::::	AUCCUUACCCUCCGUAGCUCUU
chr3D:20320504-20321145(-)	572-593	3	bdi-miR2118a/	22	UAGGAAUUGGAGGCAUCAGAAA	::::::: ::::::::: ::::	AUCCUUACCCUCCGUAGCCUUU
chr3D:20320504-20321145(-)	573-593	3	osa-miR2118a/	22	UAGGAAUUGGAGGCAUC-AGAA	::::::: ::::::::: ::::	AUCCUUACCCUCCGUAGCUCUU
chr3D:23732801-23733591(+)	700-721	4	ata-miR2118a-5p/	22	UAGGAAAAGGAGACAUCAGGAA	:::::: :::::::: :::::	AUCCUUACCCUCUGUAAUCCUU
chr3D:24126845-24127516(+)	583-604	3	bdi-miR2118a/	22	UAGGAAAAGGAGGCAUCGGGAA	:::::: :::::::::::.::	AUCCUUACCCUCCGUAGCCUUU
chr3D:24126845-24127516(+)	583-604	3	osa-miR2118a/	22	UAGGAAAAGGAGGCAUCGGGAA	:::::: ::::::::::.:::	AUCCUUACCCUCCGUAGCUCUU
chr3D:38193178-38193903(-)	635-656	3.5	bdi-miR2118a/	22	UGGGAAUGAGUGGCAUCGGAAA	:.:::::: : :::::::::::	AUCCUUACCCUCCGUAGCCUUU
chr3D:439425572-439426233(+)	551-572	4	osa-miR2118a/	22	UAGGAAUGGGAUGCAUGGAGAA	::::::::::: :::: :::::	AUCCUUACCCUCCGUAGCUCUU
chr3D:571928547-571929168(-)	530-551	4	bdi-miR2118a/	22	UGGGAGUGAGAGGCAUCUGAAA	:.:::.:: :::::::: ::::	AUCCUUACCCUCCGUAGCCUUU
chr3D:572424282-572424797(-)	426-448	4	bdi-miR2118a/	22	UAUGAAUGGGAGGCAUAUGGAAA	:: ::::::::::::: .:::::	AUCCUUACCCUCCGUA-GCCUUU
chr3D:572497030-572497648(-)	529-551	4	bdi-miR2118a/	22	UACGAAUGGUAGGCAUACGGAAA	:: :::::: :::::: ::::::	AUCCUUACCCUCCGUA-GCCUUU
chr3D:573149084-573149641(+)	447-469	4	bdi-miR2118a/	22	UAGGAAUGGGAGGCAUCUUGAAA	::::::::::::::::: ::::	AUCCUUACCCUCCGUAGC-CUUU
chr3D:573149084-573149641(+)	448-469	4	osa-miR2118a/	22	UAGGAAUGGGAGGCAUCUUGAA	::::::::::::::::: :::	AUCCUUACCCUCCGUAGCUCUU
chr4A:632763207-632763890(+)	593-614	4	bdi-miR2118a/	22	UAGCAAUGGGAGGCACCGGGAA	::: ::::::::::: :::.::	AUCCUUACCCUCCGUAGCCUUU
chr4A:632763207-632763890(+)	593-614	4	osa-miR2118a/	22	UAGCAAUGGGAGGCACCGGGAA	::: ::::::::::: ::.:::	AUCCUUACCCUCCGUAGCUCUU
chr4A:632785446-632786240(+)	677-698	2	bdi-miR2118a/	22	UAGCAAUGGGAGGCAUCGGGAA	::: :::::::::::::::.::	AUCCUUACCCUCCGUAGCCUUU
chr4A:632785446-632786240(+)	677-698	2	osa-miR2118a/	22	UAGCAAUGGGAGGCAUCGGGAA	::: ::::::::::::::.:::	AUCCUUACCCUCCGUAGCUCUU
chr4A:632840389-632840949(+)	470-491	1	bdi-miR2118a/	22	UAGCAAUGGGAGGCAUCGGAAA	::: ::::::::::::::::::	AUCCUUACCCUCCGUAGCCUUU
chr4A:632840389-632840949(+)	470-491	4	osa-miR2118a/	22	UAGCAAUGGGAGGCAUCGGAAA	::: ::::::::::::::. ::	AUCCUUACCCUCCGUAGCUCUU
chr4A:642598636-642599444(+)	699-720	3.5	ata-miR2118a-5p/	22	UAGGAAUCGGAGACAUCAGGAG	::::::: :::::::: ::::.	AUCCUUACCCUCUGUAAUCCUU
chr4A:642674844-642675695(-)	761-782	2.5	ata-miR2118a-5p/	22	UGGGAAUGGAAGACAUUAGGAA	:.::::::: ::::::::::::	AUCCUUACCCUCUGUAAUCCUU
chr4A:642852622-642853223(-)	511-532	2.5	ata-miR2118a-5p/	22	UGGGAAUGGAAGACAUUAGGAA	:.::::::: ::::::::::::	AUCCUUACCCUCUGUAAUCCUU
chr4A:686636623-686637306(-)	593-614	4	bdi-miR2118a/	22	UGGGAAUUGGAGGCAUCAGAAG	:.::::: ::::::::: :::.	AUCCUUACCCUCCGUAGCCUUU
chr4A:686636623-686637306(-)	594-614	3.5	osa-miR2118a/	22	UGGGAAUUGGAGGCAUC-AGAA	:.::::: ::::::::: ::::	AUCCUUACCCUCCGUAGCUCUU
chr4A:686927123-686927535(-)	322-343	4	ata-miR2118a-5p/	22	UAGGAUUAGGAGGCAUUGGGAA	::::: : ::::.::::.::::	AUCCUUACCCUCUGUAAUCCUU
chr4A:686927123-686927535(-)	322-343	4	bdi-miR2118a/	22	UAGGAUUAGGAGGCAUUGGGAA	::::: : ::::::::.::.::	AUCCUUACCCUCCGUAGCCUUU
chr4A:686927123-686927535(-)	322-343	4	osa-miR2118a/	22	UAGGAUUAGGAGGCAUUGGGAA	::::: : ::::::::.:.:::	AUCCUUACCCUCCGUAGCUCUU
chr4A:688397644-688398472(+)	740-761	4	ata-miR2118a-5p/	22	AGGGAAUGGAAGACAUUAGGAG	.::::::: :::::::::::.	AUCCUUACCCUCUGUAAUCCUU
chr4A:688837546-688838063(+)	448-469	4	ata-miR2118a-5p/	22	AGGGAAUUGGAGACAUUGGGAG	.::::: :::::::::.:::.	AUCCUUACCCUCUGUAAUCCUU
chr4A:698090756-698091376(-)	511-532	3	bdi-miR2118a/	22	UAUGACUGGGAGGCAUCGGGAA	:: :: :::::::::::::.::	AUCCUUACCCUCCGUAGCCUUU
chr4A:698090756-698091376(-)	511-532	3	osa-miR2118a/	22	UAUGACUGGGAGGCAUCGGGAA	:: :: ::::::::::::.:::	AUCCUUACCCUCCGUAGCUCUU
chr4A:722476858-722477457(-)	511-532	4	ata-miR2118a-5p/	22	UGAGGAUAGGAGACAUUGGGAA	:. :.:: :::::::::.::::	AUCCUUACCCUCUGUAAUCCUU
chr4B:35210441-35211187(-)	656-677	3.5	ata-miR2118a-5p/	22	UGGGCAUGAGAGGCAUUAGGAA	:.:: ::: :::.:::::::::	AUCCUUACCCUCUGUAAUCCUU
chr4B:3583746-3584618(+)	165-186	4	ata-miR2118a-5p/	22	UACGAAUGUGAGGCAUUGGGAA	:: ::::: :::.::::.::::	AUCCUUACCCUCUGUAAUCCUU
chr4B:3583746-3584618(+)	165-186	4	bdi-miR2118a/	22	UACGAAUGUGAGGCAUUGGGAA	:: ::::: :::::::.::.::	AUCCUUACCCUCCGUAGCCUUU
chr4B:3583746-3584618(+)	165-186	4	osa-miR2118a/	22	UACGAAUGUGAGGCAUUGGGAA	:: ::::: :::::::.:.:::	AUCCUUACCCUCCGUAGCUCUU
chr4D:12550357-12551170(-)	722-743	3.5	bdi-miR2118a/	22	UAAGCAUGGGAGGCAUCGGGAG	:: : ::::::::::::::.:.	AUCCUUACCCUCCGUAGCCUUU
chr4D:12550357-12551170(-)	722-743	3.5	osa-miR2118a/	22	UAAGCAUGGGAGGCAUCGGGAG	:: : :::::::::::::.::.	AUCCUUACCCUCCGUAGCUCUU
chr4D:16725109-16725687(+)	488-509	4	bdi-miR2118a/	22	UCGGAAUGAGCGGCAUCGGAAA	: :::::: : :::::::::::	AUCCUUACCCUCCGUAGCCUUU
chr5A:12206411-12207110(-)	551-572	2.5	ata-miR2118a-5p/	22	UGGGCAUGAGAGACAUUAGGAA	:.:: ::: :::::::::::::	AUCCUUACCCUCUGUAAUCCUU
chr5A:398983704-398984199(-)	404-425	4	bdi-miR2118a/	22	UAGGAUUGGGAGGCAUGGGGAA	::::: :::::::::: ::.::	AUCCUUACCCUCCGUAGCCUUU
chr5A:398983704-398984199(-)	404-425	4	osa-miR2118a/	22	UAGGAUUGGGAGGCAUGGGGAA	::::: :::::::::: :.:::	AUCCUUACCCUCCGUAGCUCUU
chr5A:600459432-600459998(+)	476-497	3	bdi-miR2118a/	22	UAGGAUUGGAAGGCAUCGGAAA	::::: ::: ::::::::::::	AUCCUUACCCUCCGUAGCCUUU
chr5A:601151344-601152294(+)	859-880	3.5	bdi-miR2118a/	22	UAGGAAUGGGAGGCAACGGGAG	::::::::::::::: :::.:.	AUCCUUACCCUCCGUAGCCUUU
chr5A:601151344-601152294(+)	859-880	3.5	osa-miR2118a/	22	UAGGAAUGGGAGGCAACGGGAG	::::::::::::::: ::.::.	AUCCUUACCCUCCGUAGCUCUU
chr5A:601683146-601683806(+)	572-593	4	osa-miR2118a/	22	UCGGAACGGGUGGCAUCGAGAA	: :::: ::: :::::::::::	AUCCUUACCCUCCGUAGCUCUU
chr5A:601710343-601710986(+)	553-574	4	osa-miR2118a/	22	UCGGAACGGGCGGCAUCGAGAA	: :::: ::: :::::::::::	AUCCUUACCCUCCGUAGCUCUU
chr5A:602268351-602269046(+)	605-626	4	osa-miR2118a/	22	UCGGAAUGAGAGGAAUCGAGAA	: :::::: :::: ::::::::	AUCCUUACCCUCCGUAGCUCUU
chr5B:35300972-35301466(-)	427-448	4	bdi-miR2118a/	22	UAGGCAUGAAAGGCAUCGGAAA	:::: ::: ::::::::::::	AUCCUUACCCUCCGUAGCCUUU
chr5B:35321034-35321698(-)	637-658	4	bdi-miR2118a/	22	UAGGCAUGAAAGGCAUCGGAAA	:::: ::: ::::::::::::	AUCCUUACCCUCCGUAGCCUUU
chr5B:523373816-523374646(-)	721-742	4	bdi-miR2118a/	22	UAGGAUCGGGAGGCAACGGAAA	::::: :::::::: ::::::	AUCCUUACCCUCCGUAGCCUUU
chr5B:531577621-531578327(-)	616-637	4	bdi-miR2118a/	22	UAGAAAUGGGAUGCAUUGGAAA	::: ::::::: ::::.:::::	AUCCUUACCCUCCGUAGCCUUU
chr5B:539303121-539303675(-)	463-485	3.5	bdi-miR2118a/	22	UAGGGCUGGGAGGCAUCAGGAAA	::::. ::::::::::: :::::	AUCCUUACCCUCCGUAG-CCUUU
chr5B:547141458-547142097(+)	593-614	4	ata-miR2118a-5p/	22	UCGGAAUAGGAGGCAUUGGGAA	: ::::: ::::.::::.::::	AUCCUUACCCUCUGUAAUCCUU
chr5B:547141458-547142097(+)	593-614	4	bdi-miR2118a/	22	UCGGAAUAGGAGGCAUUGGGAA	: ::::: ::::::::.::.::	AUCCUUACCCUCCGUAGCCUUU
chr5B:547141458-547142097(+)	593-614	4	osa-miR2118a/	22	UCGGAAUAGGAGGCAUUGGGAA	: ::::: ::::::::.:.:::	AUCCUUACCCUCCGUAGCUCUU
chr5B:547551694-547552235(+)	451-472	4	ata-miR2118a-5p/	22	UAGGAAUGUGAGGUAUUGGGAA	:::::::: :::..:::.::::	AUCCUUACCCUCUGUAAUCCUU
chr5B:547551694-547552235(+)	451-472	4	bdi-miR2118a/	22	UAGGAAUGUGAGGUAUUGGGAA	:::::::: ::::.::.::.::	AUCCUUACCCUCCGUAGCCUUU
chr5B:547551694-547552235(+)	451-472	4	osa-miR2118a/	22	UAGGAAUGUGAGGUAUUGGGAA	:::::::: ::::.::.:.:::	AUCCUUACCCUCCGUAGCUCUU
chr5B:547554219-547555113(+)	805-826	3	ata-miR2118a-5p/	22	UAGGAUUGUGAGAUAUUAGGAA	::::: :: ::::.::::::::	AUCCUUACCCUCUGUAAUCCUU
chr5B:547561324-547562238(+)	806-827	3	ata-miR2118a-5p/	22	UAGGAUUGUGAGAUAUUAGGAA	::::: :: ::::.::::::::	AUCCUUACCCUCUGUAAUCCUU
chr5B:591731402-591731919(+)	427-448	4	osa-miR2118a/	22	UCGGAAUGAGCGGCAUCGAGAA	: :::::: : :::::::::::	AUCCUUACCCUCCGUAGCUCUU
chr5B:591761014-591761699(+)	616-637	3.5	ata-miR2118a-5p/	22	UGGGAAUGAGUGACAUUAGGAA	:.:::::: : :::::::::::	AUCCUUACCCUCUGUAAUCCUU
chr5B:593475502-593476102(+)	509-530	4	ata-miR2118a-5p/	22	UUGGAAUGAGUGACAUUAGGAA	: :::::: : :::::::::::	AUCCUUACCCUCUGUAAUCCUU
chr5B:593559489-593560088(+)	509-530	4	ata-miR2118a-5p/	22	UUGGAAUGAGUGACAUUAGGAA	: :::::: : :::::::::::	AUCCUUACCCUCUGUAAUCCUU
chr5B:677920996-677921889(-)	803-824	4	bdi-miR2118a/	22	UAGCAAUGGGAGGCACCGGGAA	::: ::::::::::: :::.::	AUCCUUACCCUCCGUAGCCUUU
chr5B:677920996-677921889(-)	803-824	4	osa-miR2118a/	22	UAGCAAUGGGAGGCACCGGGAA	::: ::::::::::: ::.:::	AUCCUUACCCUCCGUAGCUCUU
chr5D:268534055-268534658(+)	513-534	3.5	ata-miR2118a-5p/	22	UGGGAAUAGGAGGCAUUGGGAA	:.::::: ::::.::::.::::	AUCCUUACCCUCUGUAAUCCUU
chr5D:268534055-268534658(+)	513-534	3.5	bdi-miR2118a/	22	UGGGAAUAGGAGGCAUUGGGAA	:.::::: ::::::::.::.::	AUCCUUACCCUCCGUAGCCUUU
chr5D:268534055-268534658(+)	513-534	3.5	osa-miR2118a/	22	UGGGAAUAGGAGGCAUUGGGAA	:.::::: ::::::::.:.:::	AUCCUUACCCUCCGUAGCUCUU
chr5D:439378499-439379098(+)	511-532	4	bdi-miR2118a/	22	UAUGAAUGUGUGGCAUCGGAAA	:: ::::: : :::::::::::	AUCCUUACCCUCCGUAGCCUUU
chr5D:439554726-439555591(+)	775-796	4	bdi-miR2118a/	22	UAUGAAUGAGAGGCAUCAGAAA	:: ::::: :::::::: ::::	AUCCUUACCCUCCGUAGCCUUU
chr5D:439554726-439555591(+)	776-796	4	osa-miR2118a/	22	UAUGAAUGAGAGGCAUC-AGAA	:: ::::: :::::::: ::::	AUCCUUACCCUCCGUAGCUCUU
chr5D:443016485-443017017(-)	443-465	3.5	bdi-miR2118a/	22	UAGGGCUGGGAGGCAUCAGGAAA	::::. ::::::::::: :::::	AUCCUUACCCUCCGUAG-CCUUU
chr5D:446768733-446769456(-)	614-635	4	bdi-miR2118a/	22	UAGGCCUGAGAGGCAUCGGGAA	:::: :: ::::::::::.::	AUCCUUACCCUCCGUAGCCUUU
chr5D:446768733-446769456(-)	614-635	4	osa-miR2118a/	22	UAGGCCUGAGAGGCAUCGGGAA	:::: :: :::::::::.:::	AUCCUUACCCUCCGUAGCUCUU
chr5D:447977748-447978830(+)	992-1013	4	ata-miR2118a-5p/	22	UCGGAAUAGGAGGCAUUGGGAA	: ::::: ::::.::::.::::	AUCCUUACCCUCUGUAAUCCUU
chr5D:447977748-447978830(+)	992-1013	4	bdi-miR2118a/	22	UCGGAAUAGGAGGCAUUGGGAA	: ::::: ::::::::.::.::	AUCCUUACCCUCCGUAGCCUUU
chr5D:447977748-447978830(+)	992-1013	4	osa-miR2118a/	22	UCGGAAUAGGAGGCAUUGGGAA	: ::::: ::::::::.:.:::	AUCCUUACCCUCCGUAGCUCUU
chr5D:447985731-447986561(+)	742-763	3	ata-miR2118a-5p/	22	UCGGAAUAGGAGGCAUUAGGAA	: ::::: ::::.:::::::::	AUCCUUACCCUCUGUAAUCCUU
chr5D:481762804-481763410(+)	446-467	4	bdi-miR2118a/	22	UAGAAUUGAGAGGCAUCGGAAU	::: : :: ::::::::::::	AUCCUUACCCUCCGUAGCCUUU
chr5D:482200052-482200485(+)	343-364	3	osa-miR2118a/	22	UCGGAAUGGGCGGCAUCGAGAA	: :::::::: :::::::::::	AUCCUUACCCUCCGUAGCUCUU
chr5D:487294816-487295289(+)	385-406	3.5	bdi-miR2118a/	22	UAGGAAUGCAAGGCAUCGGAAG	:::::::: :::::::::::.	AUCCUUACCCUCCGUAGCCUUU
chr5D:504037909-504038508(+)	553-574	4	bdi-miR2118a/	22	UGAGCGUGGGAGGCAUCGGGAA	:. : .:::::::::::::.::	AUCCUUACCCUCCGUAGCCUUU
chr5D:504037909-504038508(+)	553-574	4	osa-miR2118a/	22	UGAGCGUGGGAGGCAUCGGGAA	:. : .::::::::::::.:::	AUCCUUACCCUCCGUAGCUCUU
chr6A:97091809-97092431(+)	532-553	1	ata-miR2118a-5p/	22	UAGGAUUGGGAGACAUUAGGAA	::::: ::::::::::::::::	AUCCUUACCCUCUGUAAUCCUU
chr6A:97354939-97355643(+)	614-635	2	ata-miR2118a-5p/	22	UAGGAUUUGGAGACAUUAGGAA	::::: : ::::::::::::::	AUCCUUACCCUCUGUAAUCCUU
chr6A:97575802-97576568(+)	741-762	2	ata-miR2118a-5p/	22	UAGGAUUCGGAGACAUUAGGAA	::::: : ::::::::::::::	AUCCUUACCCUCUGUAAUCCUU
chr6A:97580459-97581248(+)	701-722	3	ata-miR2118a-5p/	22	UAGGAUUGGAAGACAUUAGGAA	::::: ::: ::::::::::::	AUCCUUACCCUCUGUAAUCCUU
chr6B:10616675-10617339(+)	574-595	3	ata-miR2118a-5p/	22	UAGGCAUGGGAGACAUAAGGAA	:::: ::::::::::: :::::	AUCCUUACCCUCUGUAAUCCUU
chr6B:154275047-154275901(+)	785-806	2	ata-miR2118a-5p/	22	UAGGAUUUGGAGACAUUAGGAA	::::: : ::::::::::::::	AUCCUUACCCUCUGUAAUCCUU
chr6B:154833141-154834043(+)	740-761	1	ata-miR2118a-5p/	22	UAGGAAUCGGAGACAUUAGGAA	::::::: ::::::::::::::	AUCCUUACCCUCUGUAAUCCUU
chr6B:155196046-155196802(+)	666-687	1	ata-miR2118a-5p/	22	UAGGAAUUGGAGACAUUAGGAA	::::::: ::::::::::::::	AUCCUUACCCUCUGUAAUCCUU
chr6B:155198869-155199344(+)	385-406	3	ata-miR2118a-5p/	22	UAGGAUUUGGAGGCAUUAGGAA	::::: : ::::.:::::::::	AUCCUUACCCUCUGUAAUCCUU
chr6B:155332721-155333404(+)	593-614	3	ata-miR2118a-5p/	22	UUGGAAUAGGAGGCAUUAGGAA	: ::::: ::::.:::::::::	AUCCUUACCCUCUGUAAUCCUU
chr6B:697955865-697956869(+)	329-348	4	ata-miR2118a-3p/ata-miR2118b-3p/	21	UUUCUUC-UGCUCCCAUUCCC	::.::.: :: ::::::::::	AAGGAGGUACAAGGGUAAGGG
chr6B:715178013-715178718(-)	617-638	4	ata-miR2118a-5p/	22	UAGCUUUGGGAGGCAUUAGGAA	::: ::::::.:::::::::	AUCCUUACCCUCUGUAAUCCUU
chr6B:716677857-716678849(-)	422-443	3.5	bdi-miR2118a/	22	AGGGAACGGGAGGCAUCGGGAA	.:::: ::::::::::::.::	AUCCUUACCCUCCGUAGCCUUU
chr6B:716677857-716678849(-)	422-443	3.5	osa-miR2118a/	22	AGGGAACGGGAGGCAUCGGGAA	.:::: :::::::::::.:::	AUCCUUACCCUCCGUAGCUCUU
chr6D:468951213-468951796(-)	493-514	3	ata-miR2118a-5p/	22	UAGGUUUGGGAGGCAUUAGGAA	:::: ::::::.:::::::::	AUCCUUACCCUCUGUAAUCCUU
chr6D:55313764-55314429(-)	575-596	3	ata-miR2118a-5p/	22	UAGGAAUAGGAGACAUCAGGAA	::::::: :::::::: :::::	AUCCUUACCCUCUGUAAUCCUU
chr6D:80599152-80599751(+)	509-530	1	ata-miR2118a-5p/	22	UAGGAUUGGGAGACAUUAGGAA	::::: ::::::::::::::::	AUCCUUACCCUCUGUAAUCCUU
chr6D:81110163-81110806(+)	553-574	3	ata-miR2118a-5p/	22	UAGGAUUUGGAGGCAUUAGGAA	::::: : ::::.:::::::::	AUCCUUACCCUCUGUAAUCCUU
chr6D:81120470-81121029(+)	469-490	4	ata-miR2118a-5p/	22	UAGGAUUUGGAGGCAUUAGGGA	::::: : ::::.:::::::.:	AUCCUUACCCUCUGUAAUCCUU
chr6D:81171628-81172506(+)	790-811	3	ata-miR2118a-5p/	22	UUGGAAUUGGAGGCAUUAGGAA	: ::::: ::::.:::::::::	AUCCUUACCCUCUGUAAUCCUU
chr6D:81212090-81212935(+)	818-839	3	ata-miR2118a-5p/	22	UUGGAAUUGGAGGCAUUAGGAA	: ::::: ::::.:::::::::	AUCCUUACCCUCUGUAAUCCUU
chr7A:107527132-107527803(-)	583-604	3	ata-miR2118a-5p/	22	UAGGAAUGGGAGACAUGGGGAA	:::::::::::::::: .::::	AUCCUUACCCUCUGUAAUCCUU
chr7A:112230975-112231574(-)	488-509	4	bdi-miR2118a/	22	UAGAAAUGGGAAGCAUCGGAGA	::: ::::::: ::::::::.:	AUCCUUACCCUCCGUAGCCUUU
chr7A:112338052-112339027(+)	865-887	3	osa-miR2118a/	22	UAGGCAUGGGAGGCAUCAGAGAA	:::: :::::::::::: :::::	AUCCUUACCCUCCGUAG-CUCUU
chr7A:112338052-112339027(+)	866-887	4	bdi-miR2118a/	22	UAGGCAUGGGAGGCAUCAGAGA	:::: :::::::::::: ::.:	AUCCUUACCCUCCGUAGCCUUU
chr7A:112355390-112356302(+)	823-845	2	osa-miR2118a/	22	UAGGAAUGGGAGGCAUCGGAGAA	:::::::::::::::::: ::::	AUCCUUACCCUCCGUAGC-UCUU
chr7A:112355390-112356302(+)	824-845	1	bdi-miR2118a/	22	UAGGAAUGGGAGGCAUCGGAGA	::::::::::::::::::::.:	AUCCUUACCCUCCGUAGCCUUU
chr7A:112456793-112457348(+)	467-488	4	bdi-miR2118a/	22	UAGGCAUGGGAUGCAUCGGAGA	:::: :::::: ::::::::.:	AUCCUUACCCUCCGUAGCCUUU
chr7A:112690368-112691076(+)	638-660	4	osa-miR2118a/	22	UAGGCAUGGGAGGCAUUGGAGAA	:::: :::::::::::.: ::::	AUCCUUACCCUCCGUAGC-UCUU
chr7A:112690368-112691076(+)	639-660	3	bdi-miR2118a/	22	UAGGCAUGGGAGGCAUUGGAGA	:::: :::::::::::.:::.:	AUCCUUACCCUCCGUAGCCUUU
chr7A:15125325-15126029(+)	616-637	4	bdi-miR2118a/	22	UAUGAUUAGGAGGCAUCGGGAA	:: :: : :::::::::::.::	AUCCUUACCCUCCGUAGCCUUU
chr7A:15125325-15126029(+)	616-637	4	osa-miR2118a/	22	UAUGAUUAGGAGGCAUCGGGAA	:: :: : ::::::::::.:::	AUCCUUACCCUCCGUAGCUCUU
chr7A:175903476-175904012(+)	468-490	3.5	bdi-miR2118a/	22	UAGGGAUGAGAGGCAUCCGGAAA	::::.::: :::::::: :::::	AUCCUUACCCUCCGUAG-CCUUU
chr7A:202726922-202727594(-)	582-603	3.5	ata-miR2118a-5p/	22	UGGGAAUAUGAGACAUUGGGAA	:.::::: ::::::::.::::	AUCCUUACCCUCUGUAAUCCUU
chr7A:37919415-37919993(+)	488-509	3	ata-miR2118a-5p/	22	UAGGAUUGGAAGACAUUAGGAA	::::: ::: ::::::::::::	AUCCUUACCCUCUGUAAUCCUU
chr7A:38025618-38026261(+)	553-574	3.5	ata-miR2118a-5p/	22	UGGGAUUGGAAGACAUUAGGAA	:.::: ::: ::::::::::::	AUCCUUACCCUCUGUAAUCCUU
chr7A:39307775-39308397(-)	532-553	4	ata-miR2118a-5p/	22	UAGAAAUGGAAGACAUUGGGAA	::: ::::: :::::::.::::	AUCCUUACCCUCUGUAAUCCUU
chr7A:42637468-42638254(+)	698-719	2	osa-miR2118a/	22	UAGGAAUGGGAGACAUCGAGAA	:::::::::::: :::::::::	AUCCUUACCCUCCGUAGCUCUU
chr7A:42812696-42813400(+)	637-659	4	bdi-miR2118a/	22	UAUGGAAUAAGAGGCAUCGGGAA	:: ::::: ::::::::::.::	AU-CCUUACCCUCCGUAGCCUUU
chr7A:42812696-42813400(+)	637-659	4	osa-miR2118a/	22	UAUGGAAUAAGAGGCAUCGGGAA	:: ::::: :::::::::.:::	AU-CCUUACCCUCCGUAGCUCUU
chr7A:5103482-5104018(-)	427-448	3.5	bdi-miR2118a/	22	UAGGGUUAGGAGGUAUCGGAAA	::::. : :::::.::::::::	AUCCUUACCCUCCGUAGCCUUU
chr7A:647303083-647303684(-)	511-532	4	ata-miR2118a-5p/	22	UAGGCAUGAGAGGUAUUAGGAA	:::: ::: :::..::::::::	AUCCUUACCCUCUGUAAUCCUU
chr7A:690071495-690072202(-)	616-637	3	ata-miR2118a-5p/	22	UAGAUAUGGGAGGCAUUAGGAA	::: :::::::.:::::::::	AUCCUUACCCUCUGUAAUCCUU
chr7A:75078789-75079266(+)	388-409	3.5	ata-miR2118a-5p/	22	UGGGAUUGGGAGACGUUGGGAA	:.::: ::::::::.::.::::	AUCCUUACCCUCUGUAAUCCUU
chr7B:11084292-11085082(+)	702-723	4	bdi-miR2118a/	22	UGAGAGUAGGAGGCAUCGGGAA	:. ::.: :::::::::::.::	AUCCUUACCCUCCGUAGCCUUU
chr7B:11084292-11085082(+)	702-723	4	osa-miR2118a/	22	UGAGAGUAGGAGGCAUCGGGAA	:. ::.: ::::::::::.:::	AUCCUUACCCUCCGUAGCUCUU
chr7B:11661822-11662440(+)	572-593	3.5	ata-miR2118a-5p/	22	UGGGAUUGGGAGACGUUGGGAA	:.::: ::::::::.::.::::	AUCCUUACCCUCUGUAAUCCUU
chr7B:138661193-138661750(+)	469-490	4	osa-miR2118a/	22	UAGGACUAGGAGGCAUCAAGAA	::::: : ::::::::: ::::	AUCCUUACCCUCCGUAGCUCUU
chr7B:138718112-138718762(+)	581-602	3.5	bdi-miR2118a/	22	UAGGGCUGAGAGGCAUCGGGAA	::::. :: ::::::::::.::	AUCCUUACCCUCCGUAGCCUUU
chr7B:138718112-138718762(+)	581-602	3.5	osa-miR2118a/	22	UAGGGCUGAGAGGCAUCGGGAA	::::. :: :::::::::.:::	AUCCUUACCCUCCGUAGCUCUU
chr7B:138727639-138728227(+)	446-467	4	osa-miR2118a/	22	UAUGUUUGGGAGGCAUCGAGGA	:: : ::::::::::::::.:	AUCCUUACCCUCCGUAGCUCUU
chr7B:581890180-581890842(-)	572-593	1.5	bdi-miR2118a/	22	UAGAAAUGGGAGGCAUCGGAAG	::: :::::::::::::::::.	AUCCUUACCCUCCGUAGCCUUU
chr7B:610097043-610097781(+)	647-669	3.5	bdi-miR2118a/	22	UAGGAGUGGUAGGCAUCAGGAAA	:::::.::: ::::::: :::::	AUCCUUACCCUCCGUAG-CCUUU
chr7B:616493294-616493937(-)	553-574	3.5	bdi-miR2118a/	22	UUGGUGUGGGAGGCAUCGGGAA	: :: .:::::::::::::.::	AUCCUUACCCUCCGUAGCCUUU
chr7B:616493294-616493937(-)	553-574	3.5	osa-miR2118a/	22	UUGGUGUGGGAGGCAUCGGGAA	: :: .::::::::::::.:::	AUCCUUACCCUCCGUAGCUCUU
chr7B:637336386-637337289(-)	834-855	4	bdi-miR2118a/	22	UAGGAAUGAGAGGCCUCGGGAA	:::::::: ::::: ::::.::	AUCCUUACCCUCCGUAGCCUUU
chr7B:637336386-637337289(-)	834-855	4	osa-miR2118a/	22	UAGGAAUGAGAGGCCUCGGGAA	:::::::: ::::: :::.:::	AUCCUUACCCUCCGUAGCUCUU
chr7B:64134020-64134600(-)	490-511	1	osa-miR2118a/	22	UAGGACUGGGAGGCAUCGAGAA	::::: ::::::::::::::::	AUCCUUACCCUCCGUAGCUCUU
chr7B:64134020-64134600(-)	490-511	4	bdi-miR2118a/	22	UAGGACUGGGAGGCAUCGAGAA	::::: :::::::::::: .::	AUCCUUACCCUCCGUAGCCUUU
chr7B:64434482-64434908(-)	338-359	3	osa-miR2118a/	22	UAGGACUGGAAGGCAUCGAGAA	::::: ::: ::::::::::::	AUCCUUACCCUCCGUAGCUCUU
chr7B:65144627-65145186(+)	469-490	4	bdi-miR2118a/	22	UAGGACUAGGAGGCAUCAGAAA	::::: : ::::::::: ::::	AUCCUUACCCUCCGUAGCCUUU
chr7B:65144627-65145186(+)	470-490	4	osa-miR2118a/	22	UAGGACUAGGAGGCAUC-AGAA	::::: : ::::::::: ::::	AUCCUUACCCUCCGUAGCUCUU
chr7B:65165316-65165853(-)	448-470	4	osa-miR2118a/	22	UAGAAAUGGGAGGCAUUGGAGAA	::: ::::::::::::.: ::::	AUCCUUACCCUCCGUAGC-UCUU
chr7B:65165316-65165853(-)	449-470	3	bdi-miR2118a/	22	UAGAAAUGGGAGGCAUUGGAGA	::: ::::::::::::.:::.:	AUCCUUACCCUCCGUAGCCUUU
chr7B:65770728-65771369(+)	552-574	4	osa-miR2118a/	22	UAGACAUGGGAGGCAUCGGAGAA	::: ::::::::::::: ::::	AUCCUUACCCUCCGUAGC-UCUU
chr7B:65770728-65771369(+)	553-574	3	bdi-miR2118a/	22	UAGACAUGGGAGGCAUCGGAGA	::: :::::::::::::::.:	AUCCUUACCCUCCGUAGCCUUU
chr7B:66502728-66503521(+)	698-719	3	ata-miR2118a-5p/	22	UAGGACUGGGAGGCAUUGGGAA	::::: ::::::.::::.::::	AUCCUUACCCUCUGUAAUCCUU
chr7B:66502728-66503521(+)	698-719	3	bdi-miR2118a/	22	UAGGACUGGGAGGCAUUGGGAA	::::: ::::::::::.::.::	AUCCUUACCCUCCGUAGCCUUU
chr7B:66502728-66503521(+)	698-719	3	osa-miR2118a/	22	UAGGACUGGGAGGCAUUGGGAA	::::: ::::::::::.:.:::	AUCCUUACCCUCCGUAGCUCUU
chr7B:675961594-675962434(-)	731-752	4	ata-miR2118a-5p/	22	UAGGUUUGAGAGGCAUUAGGAA	:::: :: :::.:::::::::	AUCCUUACCCUCUGUAAUCCUU
chr7B:677662465-677663281(+)	724-745	3	ata-miR2118a-5p/	22	UAGGCUUGGGAGGCAUUAGGAA	:::: ::::::.:::::::::	AUCCUUACCCUCUGUAAUCCUU
chr7B:677767285-677767967(+)	594-615	4	ata-miR2118a-5p/	22	UAGAUUUGGGAGGCAUUAGGAA	::: ::::::.:::::::::	AUCCUUACCCUCUGUAAUCCUU
chr7B:68317837-68318478(+)	574-595	3	ata-miR2118a-5p/	22	UGGGAGUGGGAGGUAUUAGGAA	:.:::.::::::..::::::::	AUCCUUACCCUCUGUAAUCCUU
chr7D:105643648-105644182(-)	446-467	3	osa-miR2118a/	22	UAGGACUGGAAGGCAUCGAGAA	::::: ::: ::::::::::::	AUCCUUACCCUCCGUAGCUCUU
chr7D:106629816-106630623(+)	719-740	3	bdi-miR2118a/	22	UAGGACUAGGAGGCAUCGGAGA	::::: : ::::::::::::.:	AUCCUUACCCUCCGUAGCCUUU
chr7D:106918175-106918963(+)	678-700	3	osa-miR2118a/	22	UAGGCAUGGGAGGCAUCAGAGAA	:::: :::::::::::: :::::	AUCCUUACCCUCCGUAG-CUCUU
chr7D:106918175-106918963(+)	679-700	4	bdi-miR2118a/	22	UAGGCAUGGGAGGCAUCAGAGA	:::: :::::::::::: ::.:	AUCCUUACCCUCCGUAGCCUUU
chr7D:106962927-106963547(+)	529-551	3.5	osa-miR2118a/	22	UGGGCAUGGGAGGCAUCGGAGAA	:.:: ::::::::::::: ::::	AUCCUUACCCUCCGUAGC-UCUU
chr7D:106962927-106963547(+)	530-551	2.5	bdi-miR2118a/	22	UGGGCAUGGGAGGCAUCGGAGA	:.:: :::::::::::::::.:	AUCCUUACCCUCCGUAGCCUUU
chr7D:107069962-107070482(+)	431-453	4	osa-miR2118a/	22	UAGGCAUUGGAGGCAUCGGAGAA	:::: :: :::::::::: ::::	AUCCUUACCCUCCGUAGC-UCUU
chr7D:107069962-107070482(+)	432-453	3	bdi-miR2118a/	22	UAGGCAUUGGAGGCAUCGGAGA	:::: :: ::::::::::::.:	AUCCUUACCCUCCGUAGCCUUU
chr7D:107327921-107328541(+)	550-572	3	osa-miR2118a/	22	UAGGCAUGGGAGGCAUCGGAGAA	:::: ::::::::::::: ::::	AUCCUUACCCUCCGUAGC-UCUU
chr7D:107327921-107328541(+)	551-572	2	bdi-miR2118a/	22	UAGGCAUGGGAGGCAUCGGAGA	:::: :::::::::::::::.:	AUCCUUACCCUCCGUAGCCUUU
chr7D:109017157-109017884(+)	658-679	4	ata-miR2118a-5p/	22	UUGGAUUGGGAGGUAUUAGGAA	: ::: ::::::..::::::::	AUCCUUACCCUCUGUAAUCCUU
chr7D:111218759-111219819(+)	972-993	4	ata-miR2118a-5p/	22	UAAGAAUAGGAGACAUCAGGAA	:: :::: :::::::: :::::	AUCCUUACCCUCUGUAAUCCUU
chr7D:13382830-13383587(+)	648-669	3.5	ata-miR2118a-5p/	22	UGAGAAUAGGAGACAUUGGGAA	:. :::: :::::::::.::::	AUCCUUACCCUCUGUAAUCCUU
chr7D:137785108-137785649(-)	472-493	4	bdi-miR2118a/	22	UAAGCUUGGGAGGCAUCGGGAA	:: : :::::::::::::.::	AUCCUUACCCUCCGUAGCCUUU
chr7D:137785108-137785649(-)	472-493	4	osa-miR2118a/	22	UAAGCUUGGGAGGCAUCGGGAA	:: : ::::::::::::.:::	AUCCUUACCCUCCGUAGCUCUU
chr7D:14188641-14189219(+)	509-530	4	osa-miR2118a/	22	UUGGAUUGGGAGACAUCGAGAA	: ::: :::::: :::::::::	AUCCUUACCCUCCGUAGCUCUU
chr7D:15715550-15716233(-)	595-616	3.5	bdi-miR2118a/	22	UAGGGUUAGGAGGUAUCGGAAA	::::. : :::::.::::::::	AUCCUUACCCUCCGUAGCCUUU
chr7D:173919967-173920503(+)	467-488	3.5	bdi-miR2118a/	22	UAGGGCUGAGAGGCAUCGGGAA	::::. :: ::::::::::.::	AUCCUUACCCUCCGUAGCCUUU
chr7D:173919967-173920503(+)	467-488	3.5	osa-miR2118a/	22	UAGGGCUGAGAGGCAUCGGGAA	::::. :: :::::::::.:::	AUCCUUACCCUCCGUAGCUCUU
chr7D:35411346-35411905(-)	490-511	4	ata-miR2118a-5p/	22	AGGGAAUGGAAGACAUUAGGAG	.::::::: :::::::::::.	AUCCUUACCCUCUGUAAUCCUU
chr7D:36464480-36465165(-)	616-637	2	ata-miR2118a-5p/	22	UGGGAGUGGGAGACAUUGGGAA	:.:::.:::::::::::.::::	AUCCUUACCCUCUGUAAUCCUU
chr7D:39520857-39521710(-)	763-784	2	osa-miR2118a/	22	UAGAAAUGGGAGGCAUUGAGAA	::: ::::::::::::.:::::	AUCCUUACCCUCCGUAGCUCUU
chr7D:426778609-426779271(+)	553-574	3	bdi-miR2118a/	22	UAAGAAUAGGAGGCAUCGGAAU	:: :::: :::::::::::::	AUCCUUACCCUCCGUAGCCUUU
chr7D:426778609-426779271(+)	554-574	4	osa-miR2118a/	22	UAAGAAUAGGAGGCAUCG-GAA	:: :::: :::::::::: :::	AUCCUUACCCUCCGUAGCUCUU
chr7D:53331313-53331952(-)	551-572	4	ata-miR2118a-5p/	22	UAGGAUUGAGAGGCAUUAGGGA	::::: :: :::.:::::::.:	AUCCUUACCCUCUGUAAUCCUU
chr7D:539132043-539132686(-)	553-574	1.5	bdi-miR2118a/	22	UAGAAAUGGGAGGCAUCGGAAG	::: :::::::::::::::::.	AUCCUUACCCUCCGUAGCCUUU
chr7D:596948698-596949383(-)	595-616	4	ata-miR2118a-5p/	22	UAGAUCUGGGAGGCAUUAGGAA	::: ::::::.:::::::::	AUCCUUACCCUCUGUAAUCCUU
chr7D:596985062-596985829(-)	679-700	4	ata-miR2118a-5p/	22	UAGGUUUGAGAGGCAUUAGGAA	:::: :: :::.:::::::::	AUCCUUACCCUCUGUAAUCCUU
chr7D:597122522-597123102(-)	490-511	3	ata-miR2118a-5p/	22	UAGAUAUGGGAGGCAUUAGGAA	::: :::::::.:::::::::	AUCCUUACCCUCUGUAAUCCUU
chr7D:597160279-597160813(-)	425-446	4	ata-miR2118a-5p/	22	UAGAUUUGGGAGGCAUUAGGAA	::: ::::::.:::::::::	AUCCUUACCCUCUGUAAUCCUU
chr7D:597178437-597178975(-)	469-490	3	ata-miR2118a-5p/	22	UAGAUAUGGGAGGCAUUAGGAA	::: :::::::.:::::::::	AUCCUUACCCUCUGUAAUCCUU
chr7D:598147516-598148201(-)	616-637	4	ata-miR2118a-5p/	22	UAGAUUUGGGAGGCAUUAGGAA	::: ::::::.:::::::::	AUCCUUACCCUCUGUAAUCCUU
chr7D:598181457-598182181(-)	656-677	4	ata-miR2118a-5p/	22	UAGGUUUGAGAGGCAUUAGGAA	:::: :: :::.:::::::::	AUCCUUACCCUCUGUAAUCCUU
chr7D:598261035-598261783(-)	679-700	4	ata-miR2118a-5p/	22	UAGAUUUGGGAGGCAUUAGGAA	::: ::::::.:::::::::	AUCCUUACCCUCUGUAAUCCUU
chr7D:598497314-598497944(+)	509-530	4	ata-miR2118a-5p/	22	UAGAUUUGGGAGGCAUUAGGAA	::: ::::::.:::::::::	AUCCUUACCCUCUGUAAUCCUU
chr7D:598523375-598524209(+)	742-763	4	ata-miR2118a-5p/	22	UAGAUUUGGGAGGCAUUAGGAA	::: ::::::.:::::::::	AUCCUUACCCUCUGUAAUCCUU
chr7D:69284197-69284859(+)	553-574	4	ata-miR2118a-5p/	22	UGGGAGUGAGAGACGUUGGGAA	:.:::.:: :::::.::.::::	AUCCUUACCCUCUGUAAUCCUU
chrUn:132018153-132018878(+)	636-658	4	bdi-miR2118a/	22	UAUGAAUGGGAGGCAUAUGGAAA	:: ::::::::::::: .:::::	AUCCUUACCCUCCGUA-GCCUUU
chrUn:132220872-132221492(-)	530-551	4	bdi-miR2118a/	22	UGGGAGUAGGAGGCAUCUGAAA	:.:::.: ::::::::: ::::	AUCCUUACCCUCCGUAGCCUUU
chrUn:339801714-339802546(-)	658-679	2.5	bdi-miR2118a/	22	UAGGGUUAGGAGGCAUCGGAAA	::::. : ::::::::::::::	AUCCUUACCCUCCGUAGCCUUU
chr1A:347633014-347633603(-)	520-541	3.5	osa-miR2118b/osa-miR2118n/zma-miR2118b/ata-miR2118b-5p/	22	UAGGGAUGAGGGGCGUCGGGAA	::::.::: :.:::.:::::::	AUCCUUACCCUCCGUAGCCCUU
chr1A:438663588-438664334(+)	637-658	3.5	osa-miR2118b/osa-miR2118n/zma-miR2118b/ata-miR2118b-5p/	22	UGGGCAUCAGAGGCAUCGGGAA	:.:: :: :::::::::::::	AUCCUUACCCUCCGUAGCCCUU
chr1B:31912023-31912622(+)	490-511	4	osa-miR2118b/osa-miR2118n/zma-miR2118b/ata-miR2118b-5p/	22	UAGACAUGGGAGGCAUAGGGAA	::: ::::::::::: :::::	AUCCUUACCCUCCGUAGCCCUU
chr1B:32067452-32068177(+)	635-656	4	osa-miR2118b/osa-miR2118n/zma-miR2118b/ata-miR2118b-5p/	22	UAGACAUGGGAGGCAUAGGGAA	::: ::::::::::: :::::	AUCCUUACCCUCCGUAGCCCUU
chr1B:374320212-374320664(-)	364-385	3.5	osa-miR2118b/osa-miR2118n/zma-miR2118b/ata-miR2118b-5p/	22	UAGGGAUGGGCGGCAUUGGGAA	::::.::::: :::::.:::::	AUCCUUACCCUCCGUAGCCCUU
chr1B:549706112-549706669(+)	490-511	4	osa-miR2118b/osa-miR2118n/zma-miR2118b/ata-miR2118b-5p/	22	UAGGCAUGGGAUGCGUCGGGAA	:::: :::::: ::.:::::::	AUCCUUACCCUCCGUAGCCCUU
chr1B:562357390-562358208(+)	728-749	3.5	osa-miR2118b/osa-miR2118n/zma-miR2118b/ata-miR2118b-5p/	22	UGGGAAUGGGAUGCAUUGGGAA	:.::::::::: ::::.:::::	AUCCUUACCCUCCGUAGCCCUU
chr1B:592051642-592052437(-)	707-728	4	osa-miR2118b/osa-miR2118n/zma-miR2118b/ata-miR2118b-5p/	22	UAGGAAUGAGCGGCAUUGGGAA	:::::::: : :::::.:::::	AUCCUUACCCUCCGUAGCCCUU
chr1B:592210676-592211359(-)	593-614	3.5	osa-miR2118b/osa-miR2118n/zma-miR2118b/ata-miR2118b-5p/	22	UCGGGAUGAGAGGCAUUGGGAA	: ::.::: :::::::.:::::	AUCCUUACCCUCCGUAGCCCUU
chr1B:666289892-666290554(-)	637-658	3	osa-miR2118b/osa-miR2118n/zma-miR2118b/ata-miR2118b-5p/	22	UAGGUAUGGGAGGCAUAGGGAA	:::: ::::::::::: :::::	AUCCUUACCCUCCGUAGCCCUU
chr1D:416875395-416876005(-)	520-541	3.5	osa-miR2118b/osa-miR2118n/zma-miR2118b/ata-miR2118b-5p/	22	UAGGGAUAGGAUGCAUCGGGAA	::::.:: ::: ::::::::::	AUCCUUACCCUCCGUAGCCCUU
chr1D:418644279-418645104(-)	756-777	4	osa-miR2118b/osa-miR2118n/zma-miR2118b/ata-miR2118b-5p/	22	UGAGAGUGAGAGGCAUUGGGAA	:. ::.:: :::::::.:::::	AUCCUUACCCUCCGUAGCCCUU
chr1D:436979148-436979852(-)	637-658	3	osa-miR2118b/osa-miR2118n/zma-miR2118b/ata-miR2118b-5p/	22	UAGGAAUGGGCGGCAUUGGGAA	:::::::::: :::::.:::::	AUCCUUACCCUCCGUAGCCCUU
chr1D:437547057-437547676(+)	531-552	3	osa-miR2118b/osa-miR2118n/zma-miR2118b/ata-miR2118b-5p/	22	UUGGAAUGAGAGGCAUUGGGAA	: :::::: :::::::.:::::	AUCCUUACCCUCCGUAGCCCUU
chr1D:438028805-438029449(+)	554-575	3	osa-miR2118b/osa-miR2118n/zma-miR2118b/ata-miR2118b-5p/	22	UAGGAACGAGAGGCAUUGGGAA	:::::: : :::::::.:::::	AUCCUUACCCUCCGUAGCCCUU
chr2A:19308782-19309920(+)	634-655	4	osa-miR2118b/osa-miR2118n/zma-miR2118b/ata-miR2118b-5p/	22	UAGGCAUGUGAGGCAUUGGGAU	:::: ::: :::::::.::::	AUCCUUACCCUCCGUAGCCCUU
chr2A:733130152-733130648(-)	406-427	3	osa-miR2118b/osa-miR2118n/zma-miR2118b/ata-miR2118b-5p/	22	UAGGAAUGGGAGGUGUCGGGAU	:::::::::::::..::::::	AUCCUUACCCUCCGUAGCCCUU
chr2B:690599585-690600207(+)	532-553	2.5	osa-miR2118b/osa-miR2118n/zma-miR2118b/ata-miR2118b-5p/	22	UAAGAGUAGGAGGCAUCGGGAA	:: ::.: ::::::::::::::	AUCCUUACCCUCCGUAGCCCUU
chr2D:20673791-20674472(-)	593-614	3	osa-miR2118b/osa-miR2118n/zma-miR2118b/ata-miR2118b-5p/	22	UGGGGUUAGGAGGCAUCGGGAA	:.::. : ::::::::::::::	AUCCUUACCCUCCGUAGCCCUU
chr2D:351389781-351390401(-)	530-551	3	osa-miR2118b/osa-miR2118n/zma-miR2118b/ata-miR2118b-5p/	22	UAGGAAUAGGUGGCAUCGGGAA	::::::: :: :::::::::::	AUCCUUACCCUCCGUAGCCCUU
chr2D:43418730-43419252(-)	434-455	4	osa-miR2118b/osa-miR2118n/zma-miR2118b/ata-miR2118b-5p/	22	UAGGCCUGGGAGGCAACGGGAA	:::: ::::::::: ::::::	AUCCUUACCCUCCGUAGCCCUU
chr2D:598886546-598886998(-)	362-383	4	osa-miR2118b/osa-miR2118n/zma-miR2118b/ata-miR2118b-5p/	22	UAGGAAUGGGAGGUGUCAGGAA	:::::::::::::..:: ::::	AUCCUUACCCUCCGUAGCCCUU
chr3A:14080005-14080479(-)	365-386	4	aof-miR2118b/	22	UGGGAAUAGGAGGCUUCAGGAA	:.:.::: ::::::::: ::::	AUCUUUACCCUCCGAAGCCCUU
chr3A:28406943-28407544(-)	511-532	4	osa-miR2118b/osa-miR2118n/zma-miR2118b/ata-miR2118b-5p/	22	UAGGAAUCGGAGGCGCCGGGAA	::::::: ::::::. ::::::	AUCCUUACCCUCCGUAGCCCUU
chr3A:30144670-30145100(+)	362-383	3.5	aof-miR2118b/	22	UGGGGAUGGGAGGCUUCAGGAA	:.:..:::::::::::: ::::	AUCUUUACCCUCCGAAGCCCUU
chr3A:33989988-33990631(+)	553-574	4	osa-miR2118b/osa-miR2118n/zma-miR2118b/ata-miR2118b-5p/	22	UAGGAAAAGGAGGCACCGGGAA	:::::: ::::::: ::::::	AUCCUUACCCUCCGUAGCCCUU
chr3A:579340517-579341200(-)	593-614	3.5	osa-miR2118b/osa-miR2118n/zma-miR2118b/ata-miR2118b-5p/	22	AGGGAAUGGGAUGCAUCGGGAA	.::::::::: ::::::::::	AUCCUUACCCUCCGUAGCCCUU
chr3A:646288418-646288952(+)	446-467	3	osa-miR2118b/osa-miR2118n/zma-miR2118b/ata-miR2118b-5p/	22	UAGGAAUAGGAGGCAUUGGGGA	::::::: ::::::::.:::.:	AUCCUUACCCUCCGUAGCCCUU
chr3B:32471024-32471696(-)	563-584	3.5	osa-miR2118b/osa-miR2118n/zma-miR2118b/ata-miR2118b-5p/	22	UAGGAGUUGGAGGCAUCGGAAA	:::::.: ::::::::::: ::	AUCCUUACCCUCCGUAGCCCUU
chr3B:34115749-34116236(-)	258-279	4	osa-miR2118b/osa-miR2118n/zma-miR2118b/ata-miR2118b-5p/	22	UAGGAGUAGGAGGCAUCGGUAG	:::::.: ::::::::::: :.	AUCCUUACCCUCCGUAGCCCUU
chr3B:41585935-41586434(-)	430-451	4	osa-miR2118b/osa-miR2118n/zma-miR2118b/ata-miR2118b-5p/	22	UAGGAAAAGGAGGCACCGGGAA	:::::: ::::::: ::::::	AUCCUUACCCUCCGUAGCCCUU
chr3B:42346092-42346839(+)	657-678	3	osa-miR2118b/osa-miR2118n/zma-miR2118b/ata-miR2118b-5p/	22	UAGGCUCGGGAGGCAUCGGGAA	:::: :::::::::::::::	AUCCUUACCCUCCGUAGCCCUU
chr3B:671355067-671355605(+)	490-511	3	aof-miR2118b/	22	UAGGAAUAGGAGGCUUUGGGAG	:::.::: ::::::::.::::.	AUCUUUACCCUCCGAAGCCCUU
chr3B:683762239-683762899(-)	572-593	4	aof-miR2118b/	22	UAGAACUGCGAGGCGUCGGGAA	::::: :: ::::: :::::::	AUCUUUACCCUCCGAAGCCCUU
chr3B:683762239-683762899(-)	572-593	4	osa-miR2118b/osa-miR2118n/zma-miR2118b/ata-miR2118b-5p/	22	UAGAACUGCGAGGCGUCGGGAA	::: : :: :::::.:::::::	AUCCUUACCCUCCGUAGCCCUU
chr3B:684048689-684049386(-)	607-628	4	osa-miR2118b/osa-miR2118n/zma-miR2118b/ata-miR2118b-5p/	22	UAGGAUUAUGAGGCGUCGGGAA	::::: : :::::.:::::::	AUCCUUACCCUCCGUAGCCCUU
chr3B:684051112-684051985(-)	783-804	3	osa-miR2118b/osa-miR2118n/zma-miR2118b/ata-miR2118b-5p/	22	UAGAAUUAGGAGGCAUCGGGAA	::: : : ::::::::::::::	AUCCUUACCCUCCGUAGCCCUU
chr3B:684051112-684051985(-)	783-804	4	aof-miR2118b/	22	UAGAAUUAGGAGGCAUCGGGAA	::::: : :::::: :::::::	AUCUUUACCCUCCGAAGCCCUU
chr3B:684064018-684064803(-)	657-678	3	osa-miR2118b/osa-miR2118n/zma-miR2118b/ata-miR2118b-5p/	22	UAGGAUUGCGAGGCGUCGGGAA	::::: :: :::::.:::::::	AUCCUUACCCUCCGUAGCCCUU
chr3B:684104178-684105109(-)	841-862	3	osa-miR2118b/osa-miR2118n/zma-miR2118b/ata-miR2118b-5p/	22	UAGGACUGUGAGGCGUCGGGAA	::::: :: :::::.:::::::	AUCCUUACCCUCCGUAGCCCUU
chr3B:775632135-775632608(-)	383-404	4	osa-miR2118b/osa-miR2118n/zma-miR2118b/ata-miR2118b-5p/	22	UGGGAGUUGGAGGCAUCGAGAA	:.:::.: :::::::::: :::	AUCCUUACCCUCCGUAGCCCUU
chr3B:775709168-775709792(-)	534-555	4	osa-miR2118b/osa-miR2118n/zma-miR2118b/ata-miR2118b-5p/	22	UAGGAUUGGGUGGCAUUGGGAA	::::: :::: :::::.:::::	AUCCUUACCCUCCGUAGCCCUU
chr3B:777656744-777657385(+)	532-553	3.5	osa-miR2118b/osa-miR2118n/zma-miR2118b/ata-miR2118b-5p/	22	UAGGAGUAGGAGGCAUGGGGAA	:::::.: :::::::: :::::	AUCCUUACCCUCCGUAGCCCUU
chr3B:778142898-778143625(-)	637-658	4	osa-miR2118b/osa-miR2118n/zma-miR2118b/ata-miR2118b-5p/	22	UAGUAUUAGGAGGCAUUGGGAA	::: : : ::::::::.:::::	AUCCUUACCCUCCGUAGCCCUU
chr3D:16427752-16428477(+)	637-658	4	osa-miR2118b/osa-miR2118n/zma-miR2118b/ata-miR2118b-5p/	22	UAGGAAAAGGAGGCACCGGGAA	:::::: ::::::: ::::::	AUCCUUACCCUCCGUAGCCCUU
chr3D:24126845-24127516(+)	583-604	2	osa-miR2118b/osa-miR2118n/zma-miR2118b/ata-miR2118b-5p/	22	UAGGAAAAGGAGGCAUCGGGAA	:::::: ::::::::::::::	AUCCUUACCCUCCGUAGCCCUU
chr3D:24528453-24529428(+)	866-887	4	osa-miR2118b/osa-miR2118n/zma-miR2118b/ata-miR2118b-5p/	22	UAGGAAAAGGAGGCACCGGGAA	:::::: ::::::: ::::::	AUCCUUACCCUCCGUAGCCCUU
chr3D:572486330-572486971(-)	550-572	4	osa-miR2118b/osa-miR2118n/zma-miR2118b/ata-miR2118b-5p/	22	UACGAAUGGGAGGCAUAUGGGAA	:: ::::::::::::: .:::::	AUCCUUACCCUCCGUA-GCCCUU
chr3D:573149084-573149641(+)	448-469	4	osa-miR2118b/osa-miR2118n/zma-miR2118b/ata-miR2118b-5p/	22	UAGGAAUGGGAGGCAUCUUGAA	::::::::::::::::: :::	AUCCUUACCCUCCGUAGCCCUU
chr4A:583809979-583810494(-)	425-446	4	osa-miR2118b/osa-miR2118n/zma-miR2118b/ata-miR2118b-5p/	22	UUGGAAUGAGCGGCAUCGGGAA	: :::::: : :::::::::::	AUCCUUACCCUCCGUAGCCCUU
chr4A:632763207-632763890(+)	593-614	3	osa-miR2118b/osa-miR2118n/zma-miR2118b/ata-miR2118b-5p/	22	UAGCAAUGGGAGGCACCGGGAA	::: ::::::::::: ::::::	AUCCUUACCCUCCGUAGCCCUU
chr4A:632785446-632786240(+)	677-698	1	osa-miR2118b/osa-miR2118n/zma-miR2118b/ata-miR2118b-5p/	22	UAGCAAUGGGAGGCAUCGGGAA	::: ::::::::::::::::::	AUCCUUACCCUCCGUAGCCCUU
chr4A:632785446-632786240(+)	677-698	3	aof-miR2118b/	22	UAGCAAUGGGAGGCAUCGGGAA	::: :::::::::: :::::::	AUCUUUACCCUCCGAAGCCCUU
chr4A:632840389-632840949(+)	470-491	3	osa-miR2118b/osa-miR2118n/zma-miR2118b/ata-miR2118b-5p/	22	UAGCAAUGGGAGGCAUCGGAAA	::: ::::::::::::::: ::	AUCCUUACCCUCCGUAGCCCUU
chr4A:686927123-686927535(-)	322-343	3	osa-miR2118b/osa-miR2118n/zma-miR2118b/ata-miR2118b-5p/	22	UAGGAUUAGGAGGCAUUGGGAA	::::: : ::::::::.:::::	AUCCUUACCCUCCGUAGCCCUU
chr4A:688473523-688473977(-)	385-406	4	osa-miR2118b/osa-miR2118n/zma-miR2118b/ata-miR2118b-5p/	22	UGAGAAUUGGAGGCAUUGGGAG	:. :::: ::::::::.::::.	AUCCUUACCCUCCGUAGCCCUU
chr4A:698090756-698091376(-)	511-532	2	osa-miR2118b/osa-miR2118n/zma-miR2118b/ata-miR2118b-5p/	22	UAUGACUGGGAGGCAUCGGGAA	:: :: ::::::::::::::::	AUCCUUACCCUCCGUAGCCCUU
chr4A:713288078-713288836(-)	668-689	4	aof-miR2118b/	22	CGGGAAUGGGAGACUUCGGGAA	.:.:::::::: :::::::::	AUCUUUACCCUCCGAAGCCCUU
chr4A:713943699-713944340(+)	532-553	3.5	aof-miR2118b/	22	CAGGAAUGGGAGACUUCGGGAA	::.:::::::: :::::::::	AUCUUUACCCUCCGAAGCCCUU
chr4A:719680833-719681392(-)	469-490	4	osa-miR2118b/osa-miR2118n/zma-miR2118b/ata-miR2118b-5p/	22	AGGGGAUAUGAGGCAUCGGGAA	.::.:: :::::::::::::	AUCCUUACCCUCCGUAGCCCUU
chr4A:720959510-720960107(+)	530-551	3.5	osa-miR2118b/osa-miR2118n/zma-miR2118b/ata-miR2118b-5p/	22	UGGGAAUAAGAGGCAUUGGGAA	:.::::: :::::::.:::::	AUCCUUACCCUCCGUAGCCCUU
chr4A:723849518-723850240(-)	614-635	4	osa-miR2118b/osa-miR2118n/zma-miR2118b/ata-miR2118b-5p/	22	UAGGAAUUGGAAGCAUCGGGAU	::::::: ::: :::::::::	AUCCUUACCCUCCGUAGCCCUU
chr4B:10400938-10401539(+)	553-574	4	aof-miR2118b/	22	UUGAAAUGAGAGGCCUCGGGAA	: :::::: ::::: :::::::	AUCUUUACCCUCCGAAGCCCUU
chr4B:10452475-10453139(+)	574-595	3	aof-miR2118b/	22	UAGAAAUGCGAGGCUUCAGGAA	:::::::: :::::::: ::::	AUCUUUACCCUCCGAAGCCCUU
chr4B:10479944-10480703(+)	650-671	3	aof-miR2118b/	22	UAGAAAUGGGAGGCCUUGGGAA	:::::::::::::: :.:::::	AUCUUUACCCUCCGAAGCCCUU
chr4B:10479944-10480703(+)	650-671	4	osa-miR2118b/osa-miR2118n/zma-miR2118b/ata-miR2118b-5p/	22	UAGAAAUGGGAGGCCUUGGGAA	::: :::::::::: :.:::::	AUCCUUACCCUCCGUAGCCCUU
chr4B:22906597-22907323(-)	638-659	4	osa-miR2118b/osa-miR2118n/zma-miR2118b/ata-miR2118b-5p/	22	UAAGCAUGGGAGGCAUAGGGAA	:: : ::::::::::: :::::	AUCCUUACCCUCCGUAGCCCUU
chr4B:3583746-3584618(+)	165-186	3	osa-miR2118b/osa-miR2118n/zma-miR2118b/ata-miR2118b-5p/	22	UACGAAUGUGAGGCAUUGGGAA	:: ::::: :::::::.:::::	AUCCUUACCCUCCGUAGCCCUU
chr4D:12550357-12551170(-)	722-743	2.5	osa-miR2118b/osa-miR2118n/zma-miR2118b/ata-miR2118b-5p/	22	UAAGCAUGGGAGGCAUCGGGAG	:: : ::::::::::::::::.	AUCCUUACCCUCCGUAGCCCUU
chr4D:16670171-16670709(+)	429-450	4	osa-miR2118b/osa-miR2118n/zma-miR2118b/ata-miR2118b-5p/	22	UUGGAAUGAGCGGCAUCGGGAA	: :::::: : :::::::::::	AUCCUUACCCUCCGUAGCCCUU
chr4D:5715689-5716521(+)	742-763	3	aof-miR2118b/	22	UUGAAAUGGGAGGCCUCGGGAA	: :::::::::::: :::::::	AUCUUUACCCUCCGAAGCCCUU
chr4D:5715689-5716521(+)	742-763	4	osa-miR2118b/osa-miR2118n/zma-miR2118b/ata-miR2118b-5p/	22	UUGAAAUGGGAGGCCUCGGGAA	: : :::::::::: :::::::	AUCCUUACCCUCCGUAGCCCUU
chr5A:11528072-11528587(-)	448-469	4	osa-miR2118b/osa-miR2118n/zma-miR2118b/ata-miR2118b-5p/	22	UAGGCAUAGAAGGCAUCGGGAA	:::: :: : ::::::::::::	AUCCUUACCCUCCGUAGCCCUU
chr5A:11748195-11748688(-)	424-445	4	osa-miR2118b/osa-miR2118n/zma-miR2118b/ata-miR2118b-5p/	22	UAGGAAUGAGAGGGAUUGGGAA	:::::::: :::: ::.:::::	AUCCUUACCCUCCGUAGCCCUU
chr5A:398983704-398984199(-)	404-425	3	osa-miR2118b/osa-miR2118n/zma-miR2118b/ata-miR2118b-5p/	22	UAGGAUUGGGAGGCAUGGGGAA	::::: :::::::::: :::::	AUCCUUACCCUCCGUAGCCCUU
chr5A:566615549-566616234(+)	595-616	4	osa-miR2118b/osa-miR2118n/zma-miR2118b/ata-miR2118b-5p/	22	UAGGAUUGUGAGGUAUUGGGAA	::::: :: ::::.::.:::::	AUCCUUACCCUCCGUAGCCCUU
chr5A:601151344-601152294(+)	859-880	2.5	osa-miR2118b/osa-miR2118n/zma-miR2118b/ata-miR2118b-5p/	22	UAGGAAUGGGAGGCAACGGGAG	::::::::::::::: :::::.	AUCCUUACCCUCCGUAGCCCUU
chr5A:607623384-607624111(-)	637-658	3.5	osa-miR2118b/osa-miR2118n/zma-miR2118b/ata-miR2118b-5p/	22	UGGGAAUGAAAGGCAUCGGGAA	:.:::::: ::::::::::::	AUCCUUACCCUCCGUAGCCCUU
chr5A:631705505-631706249(+)	677-698	3.5	osa-miR2118b/osa-miR2118n/zma-miR2118b/ata-miR2118b-5p/	22	UGGGCAUGGGAGGCAUGGGGAA	:.:: ::::::::::: :::::	AUCCUUACCCUCCGUAGCCCUU
chr5B:13464993-13465671(-)	511-533	4	osa-miR2118b/osa-miR2118n/zma-miR2118b/ata-miR2118b-5p/	22	UAUGGAAUAGGAGGCACCGGGAA	:: ::::: ::::::: ::::::	AU-CCUUACCCUCCGUAGCCCUU
chr5B:304275928-304276716(+)	679-700	3.5	osa-miR2118b/osa-miR2118n/zma-miR2118b/ata-miR2118b-5p/	22	UGGGAAUAUGAGGCAUUGGGAA	:.::::: :::::::.:::::	AUCCUUACCCUCCGUAGCCCUU
chr5B:523365202-523365751(-)	440-461	4	osa-miR2118b/osa-miR2118n/zma-miR2118b/ata-miR2118b-5p/	22	UAGGAUUGGGAGGCAAUGGGAA	::::: ::::::::: .:::::	AUCCUUACCCUCCGUAGCCCUU
chr5B:539303121-539303675(-)	464-485	3.5	osa-miR2118b/osa-miR2118n/zma-miR2118b/ata-miR2118b-5p/	22	UAGGGCUGGGAGGCAUCAGGAA	::::. ::::::::::: ::::	AUCCUUACCCUCCGUAGCCCUU
chr5B:547141458-547142097(+)	593-614	3	osa-miR2118b/osa-miR2118n/zma-miR2118b/ata-miR2118b-5p/	22	UCGGAAUAGGAGGCAUUGGGAA	: ::::: ::::::::.:::::	AUCCUUACCCUCCGUAGCCCUU
chr5B:547182209-547182746(+)	491-512	4	osa-miR2118b/osa-miR2118n/zma-miR2118b/ata-miR2118b-5p/	22	UUGGAUUGAGAGGCAUCGGGGA	: ::: :: :::::::::::.:	AUCCUUACCCUCCGUAGCCCUU
chr5B:547279050-547279778(+)	638-659	3.5	osa-miR2118b/osa-miR2118n/zma-miR2118b/ata-miR2118b-5p/	22	UGGGAUUGUGAGGCAUUGGGAA	:.::: :: :::::::.:::::	AUCCUUACCCUCCGUAGCCCUU
chr5B:547529308-547529951(+)	553-574	4	osa-miR2118b/osa-miR2118n/zma-miR2118b/ata-miR2118b-5p/	22	UAGGAUUGUGAGGUAUUGGGAA	::::: :: ::::.::.:::::	AUCCUUACCCUCCGUAGCCCUU
chr5B:547551694-547552235(+)	451-472	3	osa-miR2118b/osa-miR2118n/zma-miR2118b/ata-miR2118b-5p/	22	UAGGAAUGUGAGGUAUUGGGAA	:::::::: ::::.::.:::::	AUCCUUACCCUCCGUAGCCCUU
chr5B:633965475-633966200(+)	637-658	3.5	osa-miR2118b/osa-miR2118n/zma-miR2118b/ata-miR2118b-5p/	22	UGGGGGUGGGAGGCAUAGGGAA	:.::..:::::::::: :::::	AUCCUUACCCUCCGUAGCCCUU
chr5B:643939867-643940590(+)	656-677	4	osa-miR2118b/osa-miR2118n/zma-miR2118b/ata-miR2118b-5p/	22	UAGGAAGAGGAGGCAUCUGGAA	:::::: ::::::::: ::::	AUCCUUACCCUCCGUAGCCCUU
chr5B:677920996-677921889(-)	803-824	3	osa-miR2118b/osa-miR2118n/zma-miR2118b/ata-miR2118b-5p/	22	UAGCAAUGGGAGGCACCGGGAA	::: ::::::::::: ::::::	AUCCUUACCCUCCGUAGCCCUU
chr5B:678155454-678156284(-)	740-761	3.5	osa-miR2118b/osa-miR2118n/zma-miR2118b/ata-miR2118b-5p/	22	UGGCAAUGGGAGGCACCGGGAA	:.: ::::::::::: ::::::	AUCCUUACCCUCCGUAGCCCUU
chr5B:678161228-678162061(-)	743-764	3.5	osa-miR2118b/osa-miR2118n/zma-miR2118b/ata-miR2118b-5p/	22	UGGCAAUGGGAGGCACCGGGAA	:.: ::::::::::: ::::::	AUCCUUACCCUCCGUAGCCCUU
chr5D:268534055-268534658(+)	513-534	2.5	osa-miR2118b/osa-miR2118n/zma-miR2118b/ata-miR2118b-5p/	22	UGGGAAUAGGAGGCAUUGGGAA	:.::::: ::::::::.:::::	AUCCUUACCCUCCGUAGCCCUU
chr5D:443016485-443017017(-)	444-465	3.5	osa-miR2118b/osa-miR2118n/zma-miR2118b/ata-miR2118b-5p/	22	UAGGGCUGGGAGGCAUCAGGAA	::::. ::::::::::: ::::	AUCCUUACCCUCCGUAGCCCUU
chr5D:446768733-446769456(-)	614-635	3	osa-miR2118b/osa-miR2118n/zma-miR2118b/ata-miR2118b-5p/	22	UAGGCCUGAGAGGCAUCGGGAA	:::: :: :::::::::::::	AUCCUUACCCUCCGUAGCCCUU
chr5D:447897814-447898539(+)	635-655	4	osa-miR2118b/osa-miR2118n/zma-miR2118b/ata-miR2118b-5p/	22	UAG-AUUGAGAGGCAUCGGGGA	::: : :: :::::::::::.:	AUCCUUACCCUCCGUAGCCCUU
chr5D:447977748-447978830(+)	992-1013	3	osa-miR2118b/osa-miR2118n/zma-miR2118b/ata-miR2118b-5p/	22	UCGGAAUAGGAGGCAUUGGGAA	: ::::: ::::::::.:::::	AUCCUUACCCUCCGUAGCCCUU
chr5D:451688049-451688816(-)	677-698	4	osa-miR2118b/osa-miR2118n/zma-miR2118b/ata-miR2118b-5p/	22	UAGGAAGGAGAGGCAUCAGGAA	:::::: : :::::::: ::::	AUCCUUACCCUCCGUAGCCCUU
chr5D:486893476-486894343(+)	777-798	3.5	osa-miR2118b/osa-miR2118n/zma-miR2118b/ata-miR2118b-5p/	22	UAGGAAUGAAAGGCAUCGGGAG	:::::::: :::::::::::.	AUCCUUACCCUCCGUAGCCCUU
chr5D:503877178-503878122(+)	835-856	4	osa-miR2118b/osa-miR2118n/zma-miR2118b/ata-miR2118b-5p/	22	UGGGCGUGGGAGGCAUGGGGAA	:.:: .:::::::::: :::::	AUCCUUACCCUCCGUAGCCCUU
chr5D:503882088-503882796(+)	620-641	3.5	osa-miR2118b/osa-miR2118n/zma-miR2118b/ata-miR2118b-5p/	22	UGGGCAUGGGAGGCAUGGGGAA	:.:: ::::::::::: :::::	AUCCUUACCCUCCGUAGCCCUU
chr5D:504037909-504038508(+)	553-574	3	osa-miR2118b/osa-miR2118n/zma-miR2118b/ata-miR2118b-5p/	22	UGAGCGUGGGAGGCAUCGGGAA	:. : .::::::::::::::::	AUCCUUACCCUCCGUAGCCCUU
chr5D:504193153-504193878(+)	616-637	4	osa-miR2118b/osa-miR2118n/zma-miR2118b/ata-miR2118b-5p/	22	UGGGCGUGGGAGGCAUGGGGAA	:.:: .:::::::::: :::::	AUCCUUACCCUCCGUAGCCCUU
chr6A:558959710-558960376(-)	557-578	4	osa-miR2118b/osa-miR2118n/zma-miR2118b/ata-miR2118b-5p/	22	UAGGCAUGAGAGGCAUGGGGAA	:::: ::: ::::::: :::::	AUCCUUACCCUCCGUAGCCCUU
chr6A:7097701-7098445(-)	719-740	4	osa-miR2118b/osa-miR2118n/zma-miR2118b/ata-miR2118b-5p/	22	UGGGAGUAAGAGGUAUCGGGAA	:.:::.: ::::.::::::::	AUCCUUACCCUCCGUAGCCCUU
chr6B:100298575-100299113(-)	448-469	4	osa-miR2118b/osa-miR2118n/zma-miR2118b/ata-miR2118b-5p/	22	UCGGCUUGGGAGGCAUUGGGAA	: :: ::::::::::.:::::	AUCCUUACCCUCCGUAGCCCUU
chr6B:100618637-100619173(-)	448-469	4	osa-miR2118b/osa-miR2118n/zma-miR2118b/ata-miR2118b-5p/	22	UUGGAUUGGGAGGCAGCGGGAA	: ::: ::::::::: ::::::	AUCCUUACCCUCCGUAGCCCUU
chr6B:124992042-124992725(-)	593-614	4	osa-miR2118b/osa-miR2118n/zma-miR2118b/ata-miR2118b-5p/	22	UAGGAAUAGGAGGCAUCAGGAU	::::::: ::::::::: :::	AUCCUUACCCUCCGUAGCCCUU
chr6B:13822715-13823442(-)	637-658	4	osa-miR2118b/osa-miR2118n/zma-miR2118b/ata-miR2118b-5p/	22	UAGGAUUGAGAGGCAUCCGGAA	::::: :: :::::::: ::::	AUCCUUACCCUCCGUAGCCCUU
chr6B:29994289-29994993(-)	616-637	4	osa-miR2118b/osa-miR2118n/zma-miR2118b/ata-miR2118b-5p/	22	UAUGCAUGGGAGGCGUCGGGAU	:: : :::::::::.::::::	AUCCUUACCCUCCGUAGCCCUU
chr6B:646402644-646403285(-)	553-574	4	osa-miR2118b/osa-miR2118n/zma-miR2118b/ata-miR2118b-5p/	22	UGGGAGUGGGAGGGAUCGGGAU	:.:::.::::::: :::::::	AUCCUUACCCUCCGUAGCCCUU
chr6B:716677857-716678849(-)	422-443	2.5	osa-miR2118b/osa-miR2118n/zma-miR2118b/ata-miR2118b-5p/	22	AGGGAACGGGAGGCAUCGGGAA	.:::: :::::::::::::::	AUCCUUACCCUCCGUAGCCCUU
chr6D:25468708-25469391(-)	573-595	4	osa-miR2118b/osa-miR2118n/zma-miR2118b/ata-miR2118b-5p/	22	UAGGAUUGAGAGGCAUCUGGGAA	::::: :: :::::::: :::::	AUCCUUACCCUCCGUAG-CCCUU
chr6D:430398454-430399319(-)	777-798	4	osa-miR2118b/osa-miR2118n/zma-miR2118b/ata-miR2118b-5p/	22	UAGGAUUGGGAGACAUCGGGGA	::::: :::::: :::::::.:	AUCCUUACCCUCCGUAGCCCUU
chr6D:46910014-46910720(+)	616-637	4	osa-miR2118b/osa-miR2118n/zma-miR2118b/ata-miR2118b-5p/	22	UAGGAAUAGGAGGCAUCAGGAC	::::::: ::::::::: :::	AUCCUUACCCUCCGUAGCCCUU
chr6D:77756900-77757669(-)	679-700	3.5	osa-miR2118b/osa-miR2118n/zma-miR2118b/ata-miR2118b-5p/	22	AGGGAAUAGGAGGCGUCGGGAA	.::::: ::::::.:::::::	AUCCUUACCCUCCGUAGCCCUU
chr7A:107527132-107527803(-)	583-604	4	osa-miR2118b/osa-miR2118n/zma-miR2118b/ata-miR2118b-5p/	22	UAGGAAUGGGAGACAUGGGGAA	:::::::::::: ::: :::::	AUCCUUACCCUCCGUAGCCCUU
chr7A:112355390-112356302(+)	823-845	2	osa-miR2118b/osa-miR2118n/zma-miR2118b/ata-miR2118b-5p/	22	UAGGAAUGGGAGGCAUCGGAGAA	::::::::::::::::::: :::	AUCCUUACCCUCCGUAGCC-CUU
chr7A:112690368-112691076(+)	638-660	4	osa-miR2118b/osa-miR2118n/zma-miR2118b/ata-miR2118b-5p/	22	UAGGCAUGGGAGGCAUUGGAGAA	:::: :::::::::::.:: :::	AUCCUUACCCUCCGUAGCC-CUU
chr7A:15125325-15126029(+)	616-637	3	osa-miR2118b/osa-miR2118n/zma-miR2118b/ata-miR2118b-5p/	22	UAUGAUUAGGAGGCAUCGGGAA	:: :: : ::::::::::::::	AUCCUUACCCUCCGUAGCCCUU
chr7A:175903476-175904012(+)	469-490	3.5	osa-miR2118b/osa-miR2118n/zma-miR2118b/ata-miR2118b-5p/	22	UAGGGAUGAGAGGCAUCCGGAA	::::.::: :::::::: ::::	AUCCUUACCCUCCGUAGCCCUU
chr7A:19261357-19262290(-)	845-866	4	aof-miR2118b/	22	CGGGAAUGGGAGACUUCGGGAA	.:.:::::::: :::::::::	AUCUUUACCCUCCGAAGCCCUU
chr7A:42637468-42638254(+)	698-719	4	osa-miR2118b/osa-miR2118n/zma-miR2118b/ata-miR2118b-5p/	22	UAGGAAUGGGAGACAUCGAGAA	:::::::::::: ::::: :::	AUCCUUACCCUCCGUAGCCCUU
chr7A:42812696-42813400(+)	637-659	3	osa-miR2118b/osa-miR2118n/zma-miR2118b/ata-miR2118b-5p/	22	UAUGGAAUAAGAGGCAUCGGGAA	:: ::::: :::::::::::::	AU-CCUUACCCUCCGUAGCCCUU
chr7A:54931537-54932113(+)	467-488	4	osa-miR2118b/osa-miR2118n/zma-miR2118b/ata-miR2118b-5p/	22	UAGGCUUGGGAGGCAUUGGGGA	:::: ::::::::::.:::.:	AUCCUUACCCUCCGUAGCCCUU
chr7A:581946408-581947051(+)	553-574	4	osa-miR2118b/osa-miR2118n/zma-miR2118b/ata-miR2118b-5p/	22	UAGGAAAAGGAGGCAUCUGGAA	:::::: ::::::::: ::::	AUCCUUACCCUCCGUAGCCCUU
chr7A:664098992-664099782(-)	700-721	4	osa-miR2118b/osa-miR2118n/zma-miR2118b/ata-miR2118b-5p/	22	UAAGAAUAGGAUGCAUCGGGAA	:: :::: ::: ::::::::::	AUCCUUACCCUCCGUAGCCCUU
chr7B:11084292-11085082(+)	702-723	3	osa-miR2118b/osa-miR2118n/zma-miR2118b/ata-miR2118b-5p/	22	UGAGAGUAGGAGGCAUCGGGAA	:. ::.: ::::::::::::::	AUCCUUACCCUCCGUAGCCCUU
chr7B:138718112-138718762(+)	581-602	2.5	osa-miR2118b/osa-miR2118n/zma-miR2118b/ata-miR2118b-5p/	22	UAGGGCUGAGAGGCAUCGGGAA	::::. :: :::::::::::::	AUCCUUACCCUCCGUAGCCCUU
chr7B:539786935-539787616(+)	572-593	4	osa-miR2118b/osa-miR2118n/zma-miR2118b/ata-miR2118b-5p/	22	UAGGAAAAGGAGGCAUCCGGAA	:::::: ::::::::: ::::	AUCCUUACCCUCCGUAGCCCUU
chr7B:539859472-539860246(+)	635-656	4	osa-miR2118b/osa-miR2118n/zma-miR2118b/ata-miR2118b-5p/	22	UAGGAAAAGGAGGCAUCUGGAA	:::::: ::::::::: ::::	AUCCUUACCCUCCGUAGCCCUU
chr7B:539863114-539864091(+)	908-929	4	osa-miR2118b/osa-miR2118n/zma-miR2118b/ata-miR2118b-5p/	22	UAGGAAAAGGAGGCAUCUGGAA	:::::: ::::::::: ::::	AUCCUUACCCUCCGUAGCCCUU
chr7B:581890180-581890842(-)	572-593	3.5	osa-miR2118b/osa-miR2118n/zma-miR2118b/ata-miR2118b-5p/	22	UAGAAAUGGGAGGCAUCGGAAG	::: ::::::::::::::: :.	AUCCUUACCCUCCGUAGCCCUU
chr7B:610082430-610083157(+)	637-658	4	osa-miR2118b/osa-miR2118n/zma-miR2118b/ata-miR2118b-5p/	22	UAGGAGUGAUAGGCAUCGGGAG	:::::.:: :::::::::::.	AUCCUUACCCUCCGUAGCCCUU
chr7B:611403819-611404418(-)	490-511	4	osa-miR2118b/osa-miR2118n/zma-miR2118b/ata-miR2118b-5p/	22	UAGGAACGAGAGGUAUCGGGAU	:::::: : ::::.:::::::	AUCCUUACCCUCCGUAGCCCUU
chr7B:616493294-616493937(-)	553-574	2.5	osa-miR2118b/osa-miR2118n/zma-miR2118b/ata-miR2118b-5p/	22	UUGGUGUGGGAGGCAUCGGGAA	: :: .::::::::::::::::	AUCCUUACCCUCCGUAGCCCUU
chr7B:637336386-637337289(-)	834-855	3.5	aof-miR2118b/	22	UAGGAAUGAGAGGCCUCGGGAA	:::.:::: ::::: :::::::	AUCUUUACCCUCCGAAGCCCUU
chr7B:637336386-637337289(-)	834-855	3	osa-miR2118b/osa-miR2118n/zma-miR2118b/ata-miR2118b-5p/	22	UAGGAAUGAGAGGCCUCGGGAA	:::::::: ::::: :::::::	AUCCUUACCCUCCGUAGCCCUU
chr7B:64134020-64134600(-)	490-511	3	osa-miR2118b/osa-miR2118n/zma-miR2118b/ata-miR2118b-5p/	22	UAGGACUGGGAGGCAUCGAGAA	::::: :::::::::::: :::	AUCCUUACCCUCCGUAGCCCUU
chr7B:65165316-65165853(-)	448-470	4	osa-miR2118b/osa-miR2118n/zma-miR2118b/ata-miR2118b-5p/	22	UAGAAAUGGGAGGCAUUGGAGAA	::: ::::::::::::.:: :::	AUCCUUACCCUCCGUAGCC-CUU
chr7B:65770728-65771369(+)	552-574	4	osa-miR2118b/osa-miR2118n/zma-miR2118b/ata-miR2118b-5p/	22	UAGACAUGGGAGGCAUCGGAGAA	::: :::::::::::::: :::	AUCCUUACCCUCCGUAGCC-CUU
chr7B:66502728-66503521(+)	698-719	2	osa-miR2118b/osa-miR2118n/zma-miR2118b/ata-miR2118b-5p/	22	UAGGACUGGGAGGCAUUGGGAA	::::: ::::::::::.:::::	AUCCUUACCCUCCGUAGCCCUU
chr7B:66820381-66821366(+)	876-897	4	osa-miR2118b/osa-miR2118n/zma-miR2118b/ata-miR2118b-5p/	22	UAGAACUGGGAGGCACCGGGAA	::: : ::::::::: ::::::	AUCCUUACCCUCCGUAGCCCUU
chr7D:106962927-106963547(+)	529-551	3.5	osa-miR2118b/osa-miR2118n/zma-miR2118b/ata-miR2118b-5p/	22	UGGGCAUGGGAGGCAUCGGAGAA	:.:: :::::::::::::: :::	AUCCUUACCCUCCGUAGCC-CUU
chr7D:107069962-107070482(+)	431-453	4	osa-miR2118b/osa-miR2118n/zma-miR2118b/ata-miR2118b-5p/	22	UAGGCAUUGGAGGCAUCGGAGAA	:::: :: ::::::::::: :::	AUCCUUACCCUCCGUAGCC-CUU
chr7D:107327921-107328541(+)	550-572	3	osa-miR2118b/osa-miR2118n/zma-miR2118b/ata-miR2118b-5p/	22	UAGGCAUGGGAGGCAUCGGAGAA	:::: :::::::::::::: :::	AUCCUUACCCUCCGUAGCC-CUU
chr7D:137785108-137785649(-)	472-493	3	osa-miR2118b/osa-miR2118n/zma-miR2118b/ata-miR2118b-5p/	22	UAAGCUUGGGAGGCAUCGGGAA	:: : ::::::::::::::::	AUCCUUACCCUCCGUAGCCCUU
chr7D:15023507-15024087(-)	490-511	4	osa-miR2118b/osa-miR2118n/zma-miR2118b/ata-miR2118b-5p/	22	GGGGAGUAGGAGGCAUCGGGAC	.:::.: :::::::::::::	AUCCUUACCCUCCGUAGCCCUU
chr7D:173919967-173920503(+)	467-488	2.5	osa-miR2118b/osa-miR2118n/zma-miR2118b/ata-miR2118b-5p/	22	UAGGGCUGAGAGGCAUCGGGAA	::::. :: :::::::::::::	AUCCUUACCCUCCGUAGCCCUU
chr7D:18805754-18806712(-)	805-826	4	aof-miR2118b/	22	CGGGAAUGGGAGACUUCGGGAA	.:.:::::::: :::::::::	AUCUUUACCCUCCGAAGCCCUU
chr7D:192675652-192676375(-)	614-635	4	osa-miR2118b/osa-miR2118n/zma-miR2118b/ata-miR2118b-5p/	22	UAGGCUUGAGAGGCAUCGGGAU	:::: :: ::::::::::::	AUCCUUACCCUCCGUAGCCCUU
chr7D:192677795-192678476(-)	572-593	4	osa-miR2118b/osa-miR2118n/zma-miR2118b/ata-miR2118b-5p/	22	UAGGUCUGAGAGGCAUCGGGAC	:::: :: ::::::::::::	AUCCUUACCCUCCGUAGCCCUU
chr7D:30481923-30482459(+)	448-469	4	osa-miR2118b/osa-miR2118n/zma-miR2118b/ata-miR2118b-5p/	22	UAGGACUAGGAGGCAUAGGGAA	::::: : :::::::: :::::	AUCCUUACCCUCCGUAGCCCUU
chr7D:35547656-35548222(-)	457-478	4	osa-miR2118b/osa-miR2118n/zma-miR2118b/ata-miR2118b-5p/	22	AGGGAAUGGGAGGCAUCAGGAG	.::::::::::::::: :::.	AUCCUUACCCUCCGUAGCCCUU
chr7D:36464480-36465165(-)	616-637	4	osa-miR2118b/osa-miR2118n/zma-miR2118b/ata-miR2118b-5p/	22	UGGGAGUGGGAGACAUUGGGAA	:.:::.:::::: :::.:::::	AUCCUUACCCUCCGUAGCCCUU
chr7D:39520857-39521710(-)	763-784	4	osa-miR2118b/osa-miR2118n/zma-miR2118b/ata-miR2118b-5p/	22	UAGAAAUGGGAGGCAUUGAGAA	::: ::::::::::::.: :::	AUCCUUACCCUCCGUAGCCCUU
chr7D:39550940-39551623(-)	574-595	4	osa-miR2118b/osa-miR2118n/zma-miR2118b/ata-miR2118b-5p/	22	UAGAAAUGGAAGGCAUUGGGAA	::: ::::: ::::::.:::::	AUCCUUACCCUCCGUAGCCCUU
chr7D:39958416-39959161(+)	636-657	4	osa-miR2118b/osa-miR2118n/zma-miR2118b/ata-miR2118b-5p/	22	UAAGAAUAGGAGGCAUCGGGCA	:: :::: :::::::::::: :	AUCCUUACCCUCCGUAGCCCUU
chr7D:511648878-511649498(-)	530-551	3.5	osa-miR2118b/osa-miR2118n/zma-miR2118b/ata-miR2118b-5p/	22	UAGGAAUUGGAGGGAUCGGGAG	::::::: ::::: :::::::.	AUCCUUACCCUCCGUAGCCCUU
chr7D:539132043-539132686(-)	553-574	3.5	osa-miR2118b/osa-miR2118n/zma-miR2118b/ata-miR2118b-5p/	22	UAGAAAUGGGAGGCAUCGGAAG	::: ::::::::::::::: :.	AUCCUUACCCUCCGUAGCCCUU
chr1A:347633014-347633603(-)	520-541	4	osa-miR2118c/osa-miR2118q/	22	UAGGGAUGAGGGGCGUCGGGAA	::::.::. :.:::.:::::::	AUCCUUAUCCUCCGUAGCCCUU
chr1A:438663588-438664334(+)	637-658	3.5	osa-miR2118c/osa-miR2118q/	22	UGGGCAUCAGAGGCAUCGGGAA	:.:: :: :::::::::::::	AUCCUUAUCCUCCGUAGCCCUU
chr1A:510365524-510366248(-)	633-654	3.5	osa-miR2118c/osa-miR2118q/	22	UGGGAAUAAGAAGCAUCGGGAA	:.:::::: :: ::::::::::	AUCCUUAUCCUCCGUAGCCCUU
chr1A:520433240-520434332(-)	1002-1023	4	osa-miR2118c/osa-miR2118q/	22	UAGGCAUAUGAGGCAUCAGGAA	:::: ::: :::::::: ::::	AUCCUUAUCCUCCGUAGCCCUU
chr1B:374320212-374320664(-)	364-385	4	osa-miR2118c/osa-miR2118q/	22	UAGGGAUGGGCGGCAUUGGGAA	::::.::.:: :::::.:::::	AUCCUUAUCCUCCGUAGCCCUU
chr1B:562166211-562166854(+)	553-574	3.5	osa-miR2118c/osa-miR2118q/	22	UCGAAGUAGGAGGCAUUGGGAA	: : :.::::::::::.:::::	AUCCUUAUCCUCCGUAGCCCUU
chr1B:562357390-562358208(+)	728-749	4	osa-miR2118c/osa-miR2118q/	22	UGGGAAUGGGAUGCAUUGGGAA	:.:::::.::: ::::.:::::	AUCCUUAUCCUCCGUAGCCCUU
chr1B:564291121-564291851(-)	621-642	4	osa-miR2118c/osa-miR2118q/	22	UGGGAGUAGGAGGCAUUGGAAA	:.:::.::::::::::.:: ::	AUCCUUAUCCUCCGUAGCCCUU
chr1B:564445877-564446331(-)	364-385	4	osa-miR2118c/osa-miR2118q/	22	UGGGAGUAGGAGGCAUUGGAAA	:.:::.::::::::::.:: ::	AUCCUUAUCCUCCGUAGCCCUU
chr1B:564890616-564891509(-)	803-824	3.5	osa-miR2118c/osa-miR2118q/	22	UGGGCAUAGGAAGCAUCGGGAA	:.:: :::::: ::::::::::	AUCCUUAUCCUCCGUAGCCCUU
chr1B:592210676-592211359(-)	593-614	4	osa-miR2118c/osa-miR2118q/	22	UCGGGAUGAGAGGCAUUGGGAA	: ::.::. :::::::.:::::	AUCCUUAUCCUCCGUAGCCCUU
chr1B:640481384-640481866(-)	392-413	4	osa-miR2118c/osa-miR2118q/	22	UAGGCAUAGGGGGCAUCAGGAA	:::: :::::.:::::: ::::	AUCCUUAUCCUCCGUAGCCCUU
chr1B:666289892-666290554(-)	637-658	3.5	osa-miR2118c/osa-miR2118q/	22	UAGGUAUGGGAGGCAUAGGGAA	:::: ::.:::::::: :::::	AUCCUUAUCCUCCGUAGCCCUU
chr1D:393480195-393480877(+)	616-637	4	osa-miR2118c/osa-miR2118q/	22	UAGGCAUAAGAGGCACCGGGAA	:::: ::: :::::: ::::::	AUCCUUAUCCUCCGUAGCCCUU
chr1D:415460637-415461218(+)	491-512	4	osa-miR2118c/osa-miR2118q/	22	UCGAAAUAGGAGGCAUCAGGAA	: : ::::::::::::: ::::	AUCCUUAUCCUCCGUAGCCCUU
chr1D:415617247-415617739(+)	404-425	4	osa-miR2118c/osa-miR2118q/	22	UCGAAAUAGAAGGCAUCGGGAA	: : ::::: ::::::::::::	AUCCUUAUCCUCCGUAGCCCUU
chr1D:415620976-415621409(+)	364-385	4	osa-miR2118c/osa-miR2118q/	22	UCGAAAUAGGUGGCAUCGGGAA	: : :::::: :::::::::::	AUCCUUAUCCUCCGUAGCCCUU
chr1D:416875395-416876005(-)	520-541	2.5	osa-miR2118c/osa-miR2118q/	22	UAGGGAUAGGAUGCAUCGGGAA	::::.:::::: ::::::::::	AUCCUUAUCCUCCGUAGCCCUU
chr1D:417624094-417624841(-)	657-678	4	osa-miR2118c/osa-miR2118q/	22	UGGGAGUAGGAGGCAUUGGAAA	:.:::.::::::::::.:: ::	AUCCUUAUCCUCCGUAGCCCUU
chr1D:417768932-417769426(-)	385-406	4	osa-miR2118c/osa-miR2118q/	22	UGGGAGUAGGAGGCAUUGGAAA	:.:::.::::::::::.:: ::	AUCCUUAUCCUCCGUAGCCCUU
chr1D:424596718-424597425(-)	617-638	4	osa-miR2118c/osa-miR2118q/	22	UAGGCAUAUGAGGCAUCAGGAA	:::: ::: :::::::: ::::	AUCCUUAUCCUCCGUAGCCCUU
chr1D:436979148-436979852(-)	637-658	3.5	osa-miR2118c/osa-miR2118q/	22	UAGGAAUGGGCGGCAUUGGGAA	:::::::.:: :::::.:::::	AUCCUUAUCCUCCGUAGCCCUU
chr1D:437547057-437547676(+)	531-552	3.5	osa-miR2118c/osa-miR2118q/	22	UUGGAAUGAGAGGCAUUGGGAA	: :::::. :::::::.:::::	AUCCUUAUCCUCCGUAGCCCUU
chr1D:438028805-438029449(+)	554-575	3.5	osa-miR2118c/osa-miR2118q/	22	UAGGAACGAGAGGCAUUGGGAA	:::::: . :::::::.:::::	AUCCUUAUCCUCCGUAGCCCUU
chr2A:712800315-712801080(+)	656-677	3.5	osa-miR2118c/osa-miR2118q/	22	UAAGAGUAGGAGACAUCGGGAA	:: ::.:::::: :::::::::	AUCCUUAUCCUCCGUAGCCCUU
chr2A:733130152-733130648(-)	406-427	3.5	osa-miR2118c/osa-miR2118q/	22	UAGGAAUGGGAGGUGUCGGGAU	:::::::.:::::..::::::	AUCCUUAUCCUCCGUAGCCCUU
chr2B:690599585-690600207(+)	532-553	1.5	osa-miR2118c/osa-miR2118q/	22	UAAGAGUAGGAGGCAUCGGGAA	:: ::.::::::::::::::::	AUCCUUAUCCUCCGUAGCCCUU
chr2B:690674866-690675593(+)	658-679	4	osa-miR2118c/osa-miR2118q/	22	UAAGAAUAGGAGACAUUGGGAA	:: ::::::::: :::.:::::	AUCCUUAUCCUCCGUAGCCCUU
chr2D:20673791-20674472(-)	593-614	2	osa-miR2118c/osa-miR2118q/	22	UGGGGUUAGGAGGCAUCGGGAA	:.::. ::::::::::::::::	AUCCUUAUCCUCCGUAGCCCUU
chr2D:20869784-20870467(-)	614-635	4	osa-miR2118c/osa-miR2118q/	22	UAGAAUUAGGAGGCGUUGGGAA	::: : ::::::::.:.:::::	AUCCUUAUCCUCCGUAGCCCUU
chr2D:351389781-351390401(-)	530-551	2	osa-miR2118c/osa-miR2118q/	22	UAGGAAUAGGUGGCAUCGGGAA	:::::::::: :::::::::::	AUCCUUAUCCUCCGUAGCCCUU
chr2D:351389781-351390401(-)	530-551	4	aof-miR2118c/	22	UAGGAAUAGGUGGCAUCGGGAA	:::: : :::::::::::.::	UUCCUAACCCACCGUAGCCUUU
chr2D:593735870-593736543(+)	467-488	3.5	osa-miR2118c/osa-miR2118q/	22	UGGGAAGAGGAGGCACCGGGAA	:.:::: :::::::: ::::::	AUCCUUAUCCUCCGUAGCCCUU
chr3A:1114475-1115326(-)	742-763	3.5	osa-miR2118c/osa-miR2118q/	22	UGGGAAUAGGAGGCGUCGGUAA	:.::::::::::::.:::: ::	AUCCUUAUCCUCCGUAGCCCUU
chr3A:28406943-28407544(-)	511-532	4	osa-miR2118c/osa-miR2118q/	22	UAGGAAUCGGAGGCGCCGGGAA	::::::: ::::::. ::::::	AUCCUUAUCCUCCGUAGCCCUU
chr3A:30540367-30540964(-)	488-509	3.5	osa-miR2118c/osa-miR2118q/	22	UGGGGGUAGGAGGCACCGGGAA	:.::..::::::::: ::::::	AUCCUUAUCCUCCGUAGCCCUU
chr3A:33989988-33990631(+)	553-574	3	osa-miR2118c/osa-miR2118q/	22	UAGGAAAAGGAGGCACCGGGAA	:::::: :::::::: ::::::	AUCCUUAUCCUCCGUAGCCCUU
chr3A:579340517-579341200(-)	593-614	4	osa-miR2118c/osa-miR2118q/	22	AGGGAAUGGGAUGCAUCGGGAA	.:::::.::: ::::::::::	AUCCUUAUCCUCCGUAGCCCUU
chr3A:646288418-646288952(+)	446-467	2	osa-miR2118c/osa-miR2118q/	22	UAGGAAUAGGAGGCAUUGGGGA	::::::::::::::::.:::.:	AUCCUUAUCCUCCGUAGCCCUU
chr3A:646294818-646295438(+)	532-553	4	osa-miR2118c/osa-miR2118q/	22	UAGGAAUAGGUGGCAUUGGGGA	:::::::::: :::::.:::.:	AUCCUUAUCCUCCGUAGCCCUU
chr3A:646501533-646501922(+)	280-301	4	osa-miR2118c/osa-miR2118q/	22	UAGGAAUAGGAAGCAUUGGGGA	::::::::::: ::::.:::.:	AUCCUUAUCCUCCGUAGCCCUU
chr3A:646556584-646557233(+)	559-580	4	osa-miR2118c/osa-miR2118q/	22	UAGGAAUAGGAAGCAUUGGGGA	::::::::::: ::::.:::.:	AUCCUUAUCCUCCGUAGCCCUU
chr3A:691248637-691249215(-)	424-446	4	osa-miR2118c/osa-miR2118q/	22	UUGGAAUAGUAGGCAUACGGGAA	: ::::::: :::::: ::::::	AUCCUUAUCCUCCGUA-GCCCUU
chr3A:80695584-80696478(+)	785-806	4	osa-miR2118c/osa-miR2118q/	22	UAGGCCUAGGAGGUAUUGGGAA	:::: :::::::.::.:::::	AUCCUUAUCCUCCGUAGCCCUU
chr3B:115506287-115506993(+)	639-660	4	osa-miR2118c/osa-miR2118q/	22	UAGGCCUAGGAGGUAUUGGGAA	:::: :::::::.::.:::::	AUCCUUAUCCUCCGUAGCCCUU
chr3B:32471024-32471696(-)	563-584	3.5	osa-miR2118c/osa-miR2118q/	22	UAGGAGUUGGAGGCAUCGGAAA	:::::.: ::::::::::: ::	AUCCUUAUCCUCCGUAGCCCUU
chr3B:33952240-33952858(-)	509-530	4	osa-miR2118c/osa-miR2118q/	22	UGAGAGUAGGAGGUAUUGGGAA	:. ::.:::::::.::.:::::	AUCCUUAUCCUCCGUAGCCCUU
chr3B:34115749-34116236(-)	258-279	3	osa-miR2118c/osa-miR2118q/	22	UAGGAGUAGGAGGCAUCGGUAG	:::::.::::::::::::: :.	AUCCUUAUCCUCCGUAGCCCUU
chr3B:36525571-36526086(-)	467-488	4	osa-miR2118c/osa-miR2118q/	22	UGAGAAUAGGAGACAUCGGGAG	:. ::::::::: ::::::::.	AUCCUUAUCCUCCGUAGCCCUU
chr3B:41585935-41586434(-)	430-451	3	osa-miR2118c/osa-miR2118q/	22	UAGGAAAAGGAGGCACCGGGAA	:::::: :::::::: ::::::	AUCCUUAUCCUCCGUAGCCCUU
chr3B:42346092-42346839(+)	657-678	3.5	osa-miR2118c/osa-miR2118q/	22	UAGGCUCGGGAGGCAUCGGGAA	:::: .::::::::::::::	AUCCUUAUCCUCCGUAGCCCUU
chr3B:671355067-671355605(+)	490-511	3.5	osa-miR2118c/osa-miR2118q/	22	UAGGAAUAGGAGGCUUUGGGAG	:::::::::::::: :.::::.	AUCCUUAUCCUCCGUAGCCCUU
chr3B:684048689-684049386(-)	607-628	3	osa-miR2118c/osa-miR2118q/	22	UAGGAUUAUGAGGCGUCGGGAA	::::: :: :::::.:::::::	AUCCUUAUCCUCCGUAGCCCUU
chr3B:684051112-684051985(-)	783-804	2	osa-miR2118c/osa-miR2118q/	22	UAGAAUUAGGAGGCAUCGGGAA	::: : ::::::::::::::::	AUCCUUAUCCUCCGUAGCCCUU
chr3B:684064018-684064803(-)	657-678	3.5	osa-miR2118c/osa-miR2118q/	22	UAGGAUUGCGAGGCGUCGGGAA	::::: :. :::::.:::::::	AUCCUUAUCCUCCGUAGCCCUU
chr3B:684104178-684105109(-)	841-862	3.5	osa-miR2118c/osa-miR2118q/	22	UAGGACUGUGAGGCGUCGGGAA	::::: :. :::::.:::::::	AUCCUUAUCCUCCGUAGCCCUU
chr3B:758345969-758346883(-)	824-845	4	osa-miR2118c/osa-miR2118q/	22	UUGGACUAAGAGGCAUCGGGGA	: ::: :: :::::::::::.:	AUCCUUAUCCUCCGUAGCCCUU
chr3B:758457686-758458138(-)	361-383	4	osa-miR2118c/osa-miR2118q/	22	UUGGACUAGGAGGCAUCAGGGAA	: ::: ::::::::::: :::::	AUCCUUAUCCUCCGUAG-CCCUU
chr3B:759132995-759133603(-)	518-539	4	osa-miR2118c/osa-miR2118q/	22	UUGGAAUAGAAGGCAUUGGGAA	: ::::::: ::::::.:::::	AUCCUUAUCCUCCGUAGCCCUU
chr3B:764127321-764127836(+)	406-427	3.5	osa-miR2118c/osa-miR2118q/	22	UAGGAAUAUGAGACAUCGGGAG	:::::::: ::: ::::::::.	AUCCUUAUCCUCCGUAGCCCUU
chr3B:775632135-775632608(-)	383-404	4	osa-miR2118c/osa-miR2118q/	22	UGGGAGUUGGAGGCAUCGAGAA	:.:::.: :::::::::: :::	AUCCUUAUCCUCCGUAGCCCUU
chr3B:775709168-775709792(-)	534-555	3	aof-miR2118c/	22	UAGGAUUGGGUGGCAUUGGGAA	:::::::::::::::.::.::	UUCCUAACCCACCGUAGCCUUU
chr3B:777656744-777657385(+)	532-553	2.5	osa-miR2118c/osa-miR2118q/	22	UAGGAGUAGGAGGCAUGGGGAA	:::::.:::::::::: :::::	AUCCUUAUCCUCCGUAGCCCUU
chr3B:778142898-778143625(-)	637-658	3	osa-miR2118c/osa-miR2118q/	22	UAGUAUUAGGAGGCAUUGGGAA	::: : ::::::::::.:::::	AUCCUUAUCCUCCGUAGCCCUU
chr3D:16427752-16428477(+)	637-658	3	osa-miR2118c/osa-miR2118q/	22	UAGGAAAAGGAGGCACCGGGAA	:::::: :::::::: ::::::	AUCCUUAUCCUCCGUAGCCCUU
chr3D:24126845-24127516(+)	583-604	1	osa-miR2118c/osa-miR2118q/	22	UAGGAAAAGGAGGCAUCGGGAA	:::::: :::::::::::::::	AUCCUUAUCCUCCGUAGCCCUU
chr3D:24528453-24529428(+)	866-887	3	osa-miR2118c/osa-miR2118q/	22	UAGGAAAAGGAGGCACCGGGAA	:::::: :::::::: ::::::	AUCCUUAUCCUCCGUAGCCCUU
chr3D:38193178-38193903(-)	635-656	3.5	aof-miR2118c/	22	UGGGAAUGAGUGGCAUCGGAAA	.::: :: :::::::::::::	UUCCUAACCCACCGUAGCCUUU
chr3D:574712503-574713164(-)	573-594	3.5	osa-miR2118c/osa-miR2118q/	22	UAGGAAUAUGAGACAUCGGGAG	:::::::: ::: ::::::::.	AUCCUUAUCCUCCGUAGCCCUU
chr4A:632763207-632763890(+)	593-614	3.5	osa-miR2118c/osa-miR2118q/	22	UAGCAAUGGGAGGCACCGGGAA	::: :::.::::::: ::::::	AUCCUUAUCCUCCGUAGCCCUU
chr4A:632785446-632786240(+)	677-698	1.5	osa-miR2118c/osa-miR2118q/	22	UAGCAAUGGGAGGCAUCGGGAA	::: :::.::::::::::::::	AUCCUUAUCCUCCGUAGCCCUU
chr4A:632840389-632840949(+)	470-491	3.5	osa-miR2118c/osa-miR2118q/	22	UAGCAAUGGGAGGCAUCGGAAA	::: :::.::::::::::: ::	AUCCUUAUCCUCCGUAGCCCUU
chr4A:642112958-642114054(-)	987-1008	4	osa-miR2118c/osa-miR2118q/	22	UAGGAAUAAGAGACAUCGGGAU	:::::::: ::: ::::::::	AUCCUUAUCCUCCGUAGCCCUU
chr4A:642881196-642882203(-)	938-959	4	osa-miR2118c/osa-miR2118q/	22	UAGGAAUAAGAGACAUCGGGAU	:::::::: ::: ::::::::	AUCCUUAUCCUCCGUAGCCCUU
chr4A:648590107-648590663(-)	489-510	4	osa-miR2118c/osa-miR2118q/	22	UAGGAAUAGGAGGCAGCAGGAA	::::::::::::::: : ::::	AUCCUUAUCCUCCGUAGCCCUU
chr4A:672287724-672288115(-)	301-322	3.5	osa-miR2118c/osa-miR2118q/	22	UGGGAAUAGGAGACGUCGGGAA	:.:::::::::: :.:::::::	AUCCUUAUCCUCCGUAGCCCUU
chr4A:686927123-686927535(-)	322-343	2	osa-miR2118c/osa-miR2118q/	22	UAGGAUUAGGAGGCAUUGGGAA	::::: ::::::::::.:::::	AUCCUUAUCCUCCGUAGCCCUU
chr4A:688473523-688473977(-)	385-406	4	osa-miR2118c/osa-miR2118q/	22	UGAGAAUUGGAGGCAUUGGGAG	:. :::: ::::::::.::::.	AUCCUUAUCCUCCGUAGCCCUU
chr4A:698082359-698082991(-)	469-490	4	osa-miR2118c/osa-miR2118q/	22	UAGGACUAGGAGGCGUAGGGAA	::::: ::::::::.: :::::	AUCCUUAUCCUCCGUAGCCCUU
chr4A:698090756-698091376(-)	511-532	2.5	osa-miR2118c/osa-miR2118q/	22	UAUGACUGGGAGGCAUCGGGAA	:: :: :.::::::::::::::	AUCCUUAUCCUCCGUAGCCCUU
chr4A:698252999-698253659(+)	572-593	4	osa-miR2118c/osa-miR2118q/	22	UAUGACUAGGAGGCAUAGGGAA	:: :: :::::::::: :::::	AUCCUUAUCCUCCGUAGCCCUU
chr4A:698326158-698326741(+)	474-495	4	osa-miR2118c/osa-miR2118q/	22	UAUGACUAGGAGGCAUAGGGAA	:: :: :::::::::: :::::	AUCCUUAUCCUCCGUAGCCCUU
chr4A:698349709-698350287(+)	490-511	4	osa-miR2118c/osa-miR2118q/	22	UAUGACUAGGAGGCACCGGGAA	:: :: ::::::::: ::::::	AUCCUUAUCCUCCGUAGCCCUU
chr4A:698484409-698485055(+)	558-579	4	osa-miR2118c/osa-miR2118q/	22	UAUGACUAGGAGGCAUAGGGAA	:: :: :::::::::: :::::	AUCCUUAUCCUCCGUAGCCCUU
chr4A:698633441-698634143(+)	614-635	4	osa-miR2118c/osa-miR2118q/	22	UAUGACUAGGAGGCAUAGGGAA	:: :: :::::::::: :::::	AUCCUUAUCCUCCGUAGCCCUU
chr4A:719680833-719681392(-)	469-490	3	osa-miR2118c/osa-miR2118q/	22	AGGGGAUAUGAGGCAUCGGGAA	.::.::: :::::::::::::	AUCCUUAUCCUCCGUAGCCCUU
chr4A:720959510-720960107(+)	530-551	2.5	osa-miR2118c/osa-miR2118q/	22	UGGGAAUAAGAGGCAUUGGGAA	:.:::::: :::::::.:::::	AUCCUUAUCCUCCGUAGCCCUU
chr4A:722047377-722048060(-)	593-614	4	osa-miR2118c/osa-miR2118q/	22	UAUGACUAGGAGGCAUAGGGAA	:: :: :::::::::: :::::	AUCCUUAUCCUCCGUAGCCCUU
chr4A:722057058-722057679(-)	530-551	4	osa-miR2118c/osa-miR2118q/	22	UAUGACUAGGAGGCAUAGGGAA	:: :: :::::::::: :::::	AUCCUUAUCCUCCGUAGCCCUU
chr4A:722125837-722126479(-)	554-575	4	osa-miR2118c/osa-miR2118q/	22	UAUGACUAGGAGGCAUGGGGAA	:: :: :::::::::: :::::	AUCCUUAUCCUCCGUAGCCCUU
chr4A:723798928-723799560(-)	542-563	3.5	osa-miR2118c/osa-miR2118q/	22	UGAGAAUAGGAGGCAUCAGGAA	:. :::::::::::::: ::::	AUCCUUAUCCUCCGUAGCCCUU
chr4A:723849518-723850240(-)	614-635	4	osa-miR2118c/osa-miR2118q/	22	UAGGAAUUGGAAGCAUCGGGAU	::::::: ::: :::::::::	AUCCUUAUCCUCCGUAGCCCUU
chr4B:3583746-3584618(+)	165-186	3.5	osa-miR2118c/osa-miR2118q/	22	UACGAAUGUGAGGCAUUGGGAA	:: ::::. :::::::.:::::	AUCCUUAUCCUCCGUAGCCCUU
chr4D:12550357-12551170(-)	722-743	3	osa-miR2118c/osa-miR2118q/	22	UAAGCAUGGGAGGCAUCGGGAG	:: : ::.:::::::::::::.	AUCCUUAUCCUCCGUAGCCCUU
chr5A:11528072-11528587(-)	448-469	3	osa-miR2118c/osa-miR2118q/	22	UAGGCAUAGAAGGCAUCGGGAA	:::: :::: ::::::::::::	AUCCUUAUCCUCCGUAGCCCUU
chr5A:398983704-398984199(-)	404-425	3.5	osa-miR2118c/osa-miR2118q/	22	UAGGAUUGGGAGGCAUGGGGAA	::::: :.:::::::: :::::	AUCCUUAUCCUCCGUAGCCCUU
chr5A:564329101-564329679(+)	488-509	4	osa-miR2118c/osa-miR2118q/	22	UAGGAAUAGGAGGAAUGGGGAA	::::::::::::: :: :::::	AUCCUUAUCCUCCGUAGCCCUU
chr5A:601151344-601152294(+)	859-880	3	osa-miR2118c/osa-miR2118q/	22	UAGGAAUGGGAGGCAACGGGAG	:::::::.::::::: :::::.	AUCCUUAUCCUCCGUAGCCCUU
chr5A:607623384-607624111(-)	637-658	4	osa-miR2118c/osa-miR2118q/	22	UGGGAAUGAAAGGCAUCGGGAA	:.:::::. ::::::::::::	AUCCUUAUCCUCCGUAGCCCUU
chr5A:631705505-631706249(+)	677-698	4	osa-miR2118c/osa-miR2118q/	22	UGGGCAUGGGAGGCAUGGGGAA	:.:: ::.:::::::: :::::	AUCCUUAUCCUCCGUAGCCCUU
chr5A:641114758-641115502(+)	677-698	4	osa-miR2118c/osa-miR2118q/	22	UAAGAAGAGGAGGCAUCUGGAA	:: ::: :::::::::: ::::	AUCCUUAUCCUCCGUAGCCCUU
chr5B:13464993-13465671(-)	511-533	3	osa-miR2118c/osa-miR2118q/	22	UAUGGAAUAGGAGGCACCGGGAA	:: ::::::::::::: ::::::	AU-CCUUAUCCUCCGUAGCCCUU
chr5B:304269467-304270174(+)	617-638	3.5	osa-miR2118c/osa-miR2118q/	22	UGGGAACAGGAGGCACCGGGAA	:.:::: :::::::: ::::::	AUCCUUAUCCUCCGUAGCCCUU
chr5B:304275928-304276716(+)	679-700	2.5	osa-miR2118c/osa-miR2118q/	22	UGGGAAUAUGAGGCAUUGGGAA	:.:::::: :::::::.:::::	AUCCUUAUCCUCCGUAGCCCUU
chr5B:539303121-539303675(-)	464-485	4	osa-miR2118c/osa-miR2118q/	22	UAGGGCUGGGAGGCAUCAGGAA	::::. :.::::::::: ::::	AUCCUUAUCCUCCGUAGCCCUU
chr5B:544980583-544981122(+)	470-491	4	osa-miR2118c/osa-miR2118q/	22	UAUGACUAGGAGGCAUGGGGAA	:: :: :::::::::: :::::	AUCCUUAUCCUCCGUAGCCCUU
chr5B:547141458-547142097(+)	593-614	2	osa-miR2118c/osa-miR2118q/	22	UCGGAAUAGGAGGCAUUGGGAA	: ::::::::::::::.:::::	AUCCUUAUCCUCCGUAGCCCUU
chr5B:547279050-547279778(+)	638-659	4	osa-miR2118c/osa-miR2118q/	22	UGGGAUUGUGAGGCAUUGGGAA	:.::: :. :::::::.:::::	AUCCUUAUCCUCCGUAGCCCUU
chr5B:547551694-547552235(+)	451-472	3.5	osa-miR2118c/osa-miR2118q/	22	UAGGAAUGUGAGGUAUUGGGAA	:::::::. ::::.::.:::::	AUCCUUAUCCUCCGUAGCCCUU
chr5B:591755812-591756427(+)	525-546	4	osa-miR2118c/osa-miR2118q/	22	UUGGAAUAAGUGGCAUCGGGAA	: :::::: : :::::::::::	AUCCUUAUCCUCCGUAGCCCUU
chr5B:598654687-598655349(+)	553-574	3.5	osa-miR2118c/osa-miR2118q/	22	UAGGAAUAAAAGGCAUCGGGAG	:::::::: :::::::::::.	AUCCUUAUCCUCCGUAGCCCUU
chr5B:599290569-599291189(-)	572-593	3.5	osa-miR2118c/osa-miR2118q/	22	UGAGAAUAGAAGGCAUCGGGAA	:. :::::: ::::::::::::	AUCCUUAUCCUCCGUAGCCCUU
chr5B:611526049-611526793(+)	656-677	3.5	osa-miR2118c/osa-miR2118q/	22	UGUGAAUAGAAGGCAUCGGGAA	:. :::::: ::::::::::::	AUCCUUAUCCUCCGUAGCCCUU
chr5B:633965475-633966200(+)	637-658	4	osa-miR2118c/osa-miR2118q/	22	UGGGGGUGGGAGGCAUAGGGAA	:.::..:.:::::::: :::::	AUCCUUAUCCUCCGUAGCCCUU
chr5B:643939867-643940590(+)	656-677	3	osa-miR2118c/osa-miR2118q/	22	UAGGAAGAGGAGGCAUCUGGAA	:::::: :::::::::: ::::	AUCCUUAUCCUCCGUAGCCCUU
chr5B:677920996-677921889(-)	803-824	3.5	osa-miR2118c/osa-miR2118q/	22	UAGCAAUGGGAGGCACCGGGAA	::: :::.::::::: ::::::	AUCCUUAUCCUCCGUAGCCCUU
chr5B:678155454-678156284(-)	740-761	4	osa-miR2118c/osa-miR2118q/	22	UGGCAAUGGGAGGCACCGGGAA	:.: :::.::::::: ::::::	AUCCUUAUCCUCCGUAGCCCUU
chr5B:678161228-678162061(-)	743-764	4	osa-miR2118c/osa-miR2118q/	22	UGGCAAUGGGAGGCACCGGGAA	:.: :::.::::::: ::::::	AUCCUUAUCCUCCGUAGCCCUU
chr5D:268534055-268534658(+)	513-534	1.5	osa-miR2118c/osa-miR2118q/	22	UGGGAAUAGGAGGCAUUGGGAA	:.::::::::::::::.:::::	AUCCUUAUCCUCCGUAGCCCUU
chr5D:439378499-439379098(+)	511-532	4	aof-miR2118c/	22	UAUGAAUGUGUGGCAUCGGAAA	: :: :: :::::::::::::	UUCCUAACCCACCGUAGCCUUU
chr5D:443016485-443017017(-)	444-465	4	osa-miR2118c/osa-miR2118q/	22	UAGGGCUGGGAGGCAUCAGGAA	::::. :.::::::::: ::::	AUCCUUAUCCUCCGUAGCCCUU
chr5D:446768733-446769456(-)	614-635	3.5	osa-miR2118c/osa-miR2118q/	22	UAGGCCUGAGAGGCAUCGGGAA	:::: :. :::::::::::::	AUCCUUAUCCUCCGUAGCCCUU
chr5D:447977748-447978830(+)	992-1013	2	osa-miR2118c/osa-miR2118q/	22	UCGGAAUAGGAGGCAUUGGGAA	: ::::::::::::::.:::::	AUCCUUAUCCUCCGUAGCCCUU
chr5D:447985731-447986561(+)	742-763	4	osa-miR2118c/osa-miR2118q/	22	UCGGAAUAGGAGGCAUUAGGAA	: ::::::::::::::. ::::	AUCCUUAUCCUCCGUAGCCCUU
chr5D:448866157-448866759(+)	491-512	4	osa-miR2118c/osa-miR2118q/	22	UAUGAAUAAGAUGCAUCGGGAA	:: ::::: :: ::::::::::	AUCCUUAUCCUCCGUAGCCCUU
chr5D:486893476-486894343(+)	777-798	4	osa-miR2118c/osa-miR2118q/	22	UAGGAAUGAAAGGCAUCGGGAG	:::::::. :::::::::::.	AUCCUUAUCCUCCGUAGCCCUU
chr5D:500942664-500943159(-)	406-428	4	osa-miR2118c/osa-miR2118q/	22	UAAGAAUAGGAGGCGUCCGGGAA	:: :::::::::::.:: :::::	AUCCUUAUCCUCCGUAG-CCCUU
chr5D:503882088-503882796(+)	620-641	4	osa-miR2118c/osa-miR2118q/	22	UGGGCAUGGGAGGCAUGGGGAA	:.:: ::.:::::::: :::::	AUCCUUAUCCUCCGUAGCCCUU
chr5D:504037909-504038508(+)	553-574	3.5	osa-miR2118c/osa-miR2118q/	22	UGAGCGUGGGAGGCAUCGGGAA	:. : .:.::::::::::::::	AUCCUUAUCCUCCGUAGCCCUU
chr5D:512895103-512895914(+)	721-742	4	osa-miR2118c/osa-miR2118q/	22	UAAGAAGAGGAGGCAUCUGGAA	:: ::: :::::::::: ::::	AUCCUUAUCCUCCGUAGCCCUU
chr5D:513013945-513014646(+)	592-613	4	osa-miR2118c/osa-miR2118q/	22	UAGGAAGAGGAGGUAUCCGGAA	:::::: ::::::.::: ::::	AUCCUUAUCCUCCGUAGCCCUU
chr6A:24240317-24240857(+)	470-491	4	osa-miR2118c/osa-miR2118q/	22	UGGGAGUAGGAGGCGUCAGGAA	:.:::.::::::::.:: ::::	AUCCUUAUCCUCCGUAGCCCUU
chr6A:7097701-7098445(-)	719-740	3	osa-miR2118c/osa-miR2118q/	22	UGGGAGUAAGAGGUAUCGGGAA	:.:::.:: ::::.::::::::	AUCCUUAUCCUCCGUAGCCCUU
chr6B:124992042-124992725(-)	593-614	3	osa-miR2118c/osa-miR2118q/	22	UAGGAAUAGGAGGCAUCAGGAU	::::::::::::::::: :::	AUCCUUAUCCUCCGUAGCCCUU
chr6B:125353154-125353732(-)	488-509	4	osa-miR2118c/osa-miR2118q/	22	UAGGAGUAGGAGUCGUCGGGAG	:::::.:::::: :.::::::.	AUCCUUAUCCUCCGUAGCCCUU
chr6B:155332721-155333404(+)	593-614	4	osa-miR2118c/osa-miR2118q/	22	UUGGAAUAGGAGGCAUUAGGAA	: ::::::::::::::. ::::	AUCCUUAUCCUCCGUAGCCCUU
chr6B:33476512-33477132(+)	532-553	3.5	osa-miR2118c/osa-miR2118q/	22	UGGGAAUAUGAGGCAUCUGGAA	:.:::::: :::::::: ::::	AUCCUUAUCCUCCGUAGCCCUU
chr6B:42739126-42739668(-)	473-494	3.5	osa-miR2118c/osa-miR2118q/	22	UGAGAAUAGGAGGCAUCAGGAA	:. :::::::::::::: ::::	AUCCUUAUCCUCCGUAGCCCUU
chr6B:716677857-716678849(-)	422-443	3	osa-miR2118c/osa-miR2118q/	22	AGGGAACGGGAGGCAUCGGGAA	.:::: .::::::::::::::	AUCCUUAUCCUCCGUAGCCCUU
chr6D:46910014-46910720(+)	616-637	3	osa-miR2118c/osa-miR2118q/	22	UAGGAAUAGGAGGCAUCAGGAC	::::::::::::::::: :::	AUCCUUAUCCUCCGUAGCCCUU
chr6D:55077096-55078052(-)	887-908	4	osa-miR2118c/osa-miR2118q/	22	UAGGAAUAGGAGCCAUCAGGAA	:::::::::::: :::: ::::	AUCCUUAUCCUCCGUAGCCCUU
chr6D:55313764-55314429(-)	575-596	4	osa-miR2118c/osa-miR2118q/	22	UAGGAAUAGGAGACAUCAGGAA	:::::::::::: :::: ::::	AUCCUUAUCCUCCGUAGCCCUU
chr6D:77756900-77757669(-)	679-700	2.5	osa-miR2118c/osa-miR2118q/	22	AGGGAAUAGGAGGCGUCGGGAA	.::::::::::::.:::::::	AUCCUUAUCCUCCGUAGCCCUU
chr7A:112355390-112356302(+)	823-845	2.5	osa-miR2118c/osa-miR2118q/	22	UAGGAAUGGGAGGCAUCGGAGAA	:::::::.::::::::::: :::	AUCCUUAUCCUCCGUAGCC-CUU
chr7A:12761009-12761797(+)	679-700	3.5	osa-miR2118c/osa-miR2118q/	22	UGAGAAUAGGAGGCAUCUGGAA	:. :::::::::::::: ::::	AUCCUUAUCCUCCGUAGCCCUU
chr7A:15119535-15120036(+)	411-432	3.5	osa-miR2118c/osa-miR2118q/	22	UAGAAAUAGGAUGCAUCGGGAG	::: ::::::: :::::::::.	AUCCUUAUCCUCCGUAGCCCUU
chr7A:15125325-15126029(+)	616-637	2	osa-miR2118c/osa-miR2118q/	22	UAUGAUUAGGAGGCAUCGGGAA	:: :: ::::::::::::::::	AUCCUUAUCCUCCGUAGCCCUU
chr7A:175903476-175904012(+)	469-490	4	osa-miR2118c/osa-miR2118q/	22	UAGGGAUGAGAGGCAUCCGGAA	::::.::. :::::::: ::::	AUCCUUAUCCUCCGUAGCCCUU
chr7A:30864326-30864967(+)	553-574	4	osa-miR2118c/osa-miR2118q/	22	UAUGACUAGGAGGCAUAGGGAA	:: :: :::::::::: :::::	AUCCUUAUCCUCCGUAGCCCUU
chr7A:40705748-40706549(-)	637-658	3.5	osa-miR2118c/osa-miR2118q/	22	AGGGAAUAGGAGACAUCGGGAA	.:::::::::: :::::::::	AUCCUUAUCCUCCGUAGCCCUU
chr7A:42812696-42813400(+)	637-659	2	osa-miR2118c/osa-miR2118q/	22	UAUGGAAUAAGAGGCAUCGGGAA	:: :::::: :::::::::::::	AU-CCUUAUCCUCCGUAGCCCUU
chr7A:581849053-581849652(+)	490-511	4	osa-miR2118c/osa-miR2118q/	22	UAGGAAAAGGGGGCAUCUGGAA	:::::: :::.:::::: ::::	AUCCUUAUCCUCCGUAGCCCUU
chr7A:581946408-581947051(+)	553-574	3	osa-miR2118c/osa-miR2118q/	22	UAGGAAAAGGAGGCAUCUGGAA	:::::: :::::::::: ::::	AUCCUUAUCCUCCGUAGCCCUU
chr7A:616736583-616737099(-)	428-449	3.5	osa-miR2118c/osa-miR2118q/	22	UAGAGAUAAGAGGCAUCGGGAC	::: .::: ::::::::::::	AUCCUUAUCCUCCGUAGCCCUU
chr7A:664098992-664099782(-)	700-721	3	osa-miR2118c/osa-miR2118q/	22	UAAGAAUAGGAUGCAUCGGGAA	:: :::::::: ::::::::::	AUCCUUAUCCUCCGUAGCCCUU
chr7B:11084292-11085082(+)	702-723	2	osa-miR2118c/osa-miR2118q/	22	UGAGAGUAGGAGGCAUCGGGAA	:. ::.::::::::::::::::	AUCCUUAUCCUCCGUAGCCCUU
chr7B:138718112-138718762(+)	581-602	3	osa-miR2118c/osa-miR2118q/	22	UAGGGCUGAGAGGCAUCGGGAA	::::. :. :::::::::::::	AUCCUUAUCCUCCGUAGCCCUU
chr7B:155900321-155900985(-)	555-576	4	osa-miR2118c/osa-miR2118q/	22	UAGGUUUAAGAGGCAUCGGGAU	:::: :: ::::::::::::	AUCCUUAUCCUCCGUAGCCCUU
chr7B:539786935-539787616(+)	572-593	3	osa-miR2118c/osa-miR2118q/	22	UAGGAAAAGGAGGCAUCCGGAA	:::::: :::::::::: ::::	AUCCUUAUCCUCCGUAGCCCUU
chr7B:539859472-539860246(+)	635-656	3	osa-miR2118c/osa-miR2118q/	22	UAGGAAAAGGAGGCAUCUGGAA	:::::: :::::::::: ::::	AUCCUUAUCCUCCGUAGCCCUU
chr7B:539863114-539864091(+)	908-929	3	osa-miR2118c/osa-miR2118q/	22	UAGGAAAAGGAGGCAUCUGGAA	:::::: :::::::::: ::::	AUCCUUAUCCUCCGUAGCCCUU
chr7B:579775586-579776104(+)	430-451	3.5	osa-miR2118c/osa-miR2118q/	22	UAGAGAUAAGAGGCAUCGGGAC	::: .::: ::::::::::::	AUCCUUAUCCUCCGUAGCCCUU
chr7B:581890180-581890842(-)	572-593	4	osa-miR2118c/osa-miR2118q/	22	UAGAAAUGGGAGGCAUCGGAAG	::: :::.::::::::::: :.	AUCCUUAUCCUCCGUAGCCCUU
chr7B:615678374-615678975(-)	532-553	4	osa-miR2118c/osa-miR2118q/	22	UUGGAAUAGGAGGCACCGGGAC	: ::::::::::::: :::::	AUCCUUAUCCUCCGUAGCCCUU
chr7B:616493294-616493937(-)	553-574	3	osa-miR2118c/osa-miR2118q/	22	UUGGUGUGGGAGGCAUCGGGAA	: :: .:.::::::::::::::	AUCCUUAUCCUCCGUAGCCCUU
chr7B:633898656-633899339(-)	574-595	4	osa-miR2118c/osa-miR2118q/	22	UAGGAAUAGGAUGCAUCAGGAA	::::::::::: ::::: ::::	AUCCUUAUCCUCCGUAGCCCUU
chr7B:637336386-637337289(-)	834-855	3.5	osa-miR2118c/osa-miR2118q/	22	UAGGAAUGAGAGGCCUCGGGAA	:::::::. ::::: :::::::	AUCCUUAUCCUCCGUAGCCCUU
chr7B:64134020-64134600(-)	490-511	3.5	osa-miR2118c/osa-miR2118q/	22	UAGGACUGGGAGGCAUCGAGAA	::::: :.:::::::::: :::	AUCCUUAUCCUCCGUAGCCCUU
chr7B:66502728-66503521(+)	698-719	2.5	osa-miR2118c/osa-miR2118q/	22	UAGGACUGGGAGGCAUUGGGAA	::::: :.::::::::.:::::	AUCCUUAUCCUCCGUAGCCCUU
chr7D:106629816-106630623(+)	719-740	4	osa-miR2118c/osa-miR2118q/	22	UAGGACUAGGAGGCAUCGGAGA	::::: ::::::::::::: .:	AUCCUUAUCCUCCGUAGCCCUU
chr7D:106962927-106963547(+)	529-551	4	osa-miR2118c/osa-miR2118q/	22	UGGGCAUGGGAGGCAUCGGAGAA	:.:: ::.::::::::::: :::	AUCCUUAUCCUCCGUAGCC-CUU
chr7D:107069962-107070482(+)	431-453	4	osa-miR2118c/osa-miR2118q/	22	UAGGCAUUGGAGGCAUCGGAGAA	:::: :: ::::::::::: :::	AUCCUUAUCCUCCGUAGCC-CUU
chr7D:107327921-107328541(+)	550-572	3.5	osa-miR2118c/osa-miR2118q/	22	UAGGCAUGGGAGGCAUCGGAGAA	:::: ::.::::::::::: :::	AUCCUUAUCCUCCGUAGCC-CUU
chr7D:137785108-137785649(-)	472-493	3.5	osa-miR2118c/osa-miR2118q/	22	UAAGCUUGGGAGGCAUCGGGAA	:: : :.::::::::::::::	AUCCUUAUCCUCCGUAGCCCUU
chr7D:14904125-14904745(-)	553-574	3.5	osa-miR2118c/osa-miR2118q/	22	UGUGAAUAAGAGGCAUUGGGAA	:. ::::: :::::::.:::::	AUCCUUAUCCUCCGUAGCCCUU
chr7D:15023507-15024087(-)	490-511	3	osa-miR2118c/osa-miR2118q/	22	GGGGAGUAGGAGGCAUCGGGAC	.:::.:::::::::::::::	AUCCUUAUCCUCCGUAGCCCUU
chr7D:173919967-173920503(+)	467-488	3	osa-miR2118c/osa-miR2118q/	22	UAGGGCUGAGAGGCAUCGGGAA	::::. :. :::::::::::::	AUCCUUAUCCUCCGUAGCCCUU
chr7D:30384098-30385022(+)	855-876	4	osa-miR2118c/osa-miR2118q/	22	UAUGACUAGGAGGCAUAGGGAA	:: :: :::::::::: :::::	AUCCUUAUCCUCCGUAGCCCUU
chr7D:30424194-30424814(+)	532-553	4	osa-miR2118c/osa-miR2118q/	22	UAUGAUUAGGAGGCAUAGGGAA	:: :: :::::::::: :::::	AUCCUUAUCCUCCGUAGCCCUU
chr7D:30481923-30482459(+)	448-469	3	osa-miR2118c/osa-miR2118q/	22	UAGGACUAGGAGGCAUAGGGAA	::::: :::::::::: :::::	AUCCUUAUCCUCCGUAGCCCUU
chr7D:36987256-36987771(+)	425-446	3.5	osa-miR2118c/osa-miR2118q/	22	UGGGAUUAGGAAGCAUCGGGAA	:.::: ::::: ::::::::::	AUCCUUAUCCUCCGUAGCCCUU
chr7D:39958416-39959161(+)	636-657	3	osa-miR2118c/osa-miR2118q/	22	UAAGAAUAGGAGGCAUCGGGCA	:: ::::::::::::::::: :	AUCCUUAUCCUCCGUAGCCCUU
chr7D:426778609-426779271(+)	553-574	4	osa-miR2118c/osa-miR2118q/	22	UAAGAAUAGGAGGCAUCGGAAU	:: :::::::::::::::: :	AUCCUUAUCCUCCGUAGCCCUU
chr7D:511648878-511649498(-)	530-551	3.5	osa-miR2118c/osa-miR2118q/	22	UAGGAAUUGGAGGGAUCGGGAG	::::::: ::::: :::::::.	AUCCUUAUCCUCCGUAGCCCUU
chr7D:536500141-536500908(+)	658-679	3.5	osa-miR2118c/osa-miR2118q/	22	UAGGGUUAAGAGGCAUCGGGAC	::::. :: ::::::::::::	AUCCUUAUCCUCCGUAGCCCUU
chr7D:539132043-539132686(-)	553-574	4	osa-miR2118c/osa-miR2118q/	22	UAGAAAUGGGAGGCAUCGGAAG	::: :::.::::::::::: :.	AUCCUUAUCCUCCGUAGCCCUU
chr7D:565301210-565301832(-)	532-553	4	osa-miR2118c/osa-miR2118q/	22	UUGGAAUAGGAGGCACCGGGAC	: ::::::::::::: :::::	AUCCUUAUCCUCCGUAGCCCUU
chr7D:565489234-565489873(-)	530-551	4	osa-miR2118c/osa-miR2118q/	22	UCGGCAUAGGAGGUAUCGGGAU	: :: ::::::::.:::::::	AUCCUUAUCCUCCGUAGCCCUU
chrUn:112565834-112566475(-)	572-593	3.5	osa-miR2118c/osa-miR2118q/	22	UGAGAUUAGGAGGCGUCGGGAA	:. :: ::::::::.:::::::	AUCCUUAUCCUCCGUAGCCCUU
chrUn:21558984-21559627(-)	595-616	4	osa-miR2118c/osa-miR2118q/	22	UAGGCUUAAGAGGCAUUGGGAA	:::: :: :::::::.:::::	AUCCUUAUCCUCCGUAGCCCUU
chrUn:31902228-31902909(-)	593-614	4	osa-miR2118c/osa-miR2118q/	22	AAGGAAAAGGAGGCACCGGGAA	::::: :::::::: ::::::	AUCCUUAUCCUCCGUAGCCCUU
chrUn:339801714-339802546(-)	658-679	3.5	osa-miR2118c/osa-miR2118q/	22	UAGGGUUAGGAGGCAUCGGAAA	::::. ::::::::::::: ::	AUCCUUAUCCUCCGUAGCCCUU
chrUn:48814153-48814898(-)	635-656	3.5	osa-miR2118c/osa-miR2118q/	22	AGGGAAUAGGAGACAUCGGGAA	.:::::::::: :::::::::	AUCCUUAUCCUCCGUAGCCCUU
chrUn:48829883-48830503(-)	511-531	4	osa-miR2118c/osa-miR2118q/	22	UAG-AAUAAGAGGCACCGGGAA	::: :::: :::::: ::::::	AUCCUUAUCCUCCGUAGCCCUU
chrUn:92630812-92631455(-)	553-574	4	osa-miR2118c/osa-miR2118q/	22	UAGGAAUAGGAUGCAUCAGGAA	::::::::::: ::::: ::::	AUCCUUAUCCUCCGUAGCCCUU
chr1A:438663588-438664334(+)	637-658	3.5	osa-miR2118d/zma-miR2118d/sbi-miR2118-3p/ata-miR2118c-3p/ata-miR2118d-3p/	22	UGGGCAUCAGAGGCAUCGGGAA	:.::::: ::::::::.::::	AUCCGUACCCUCCGUAGUCCUU
chr1A:494189370-494189951(-)	462-483	4	osa-miR2118d/zma-miR2118d/sbi-miR2118-3p/ata-miR2118c-3p/ata-miR2118d-3p/	22	UUGGAAUGGGAGGCAUCAGAAA	: :: :::::::::::::: ::	AUCCGUACCCUCCGUAGUCCUU
chr1A:520433240-520434332(-)	1002-1023	2	osa-miR2118d/zma-miR2118d/sbi-miR2118-3p/ata-miR2118c-3p/ata-miR2118d-3p/	22	UAGGCAUAUGAGGCAUCAGGAA	::::::: :::::::::::::	AUCCGUACCCUCCGUAGUCCUU
chr1A:543386158-543386715(-)	488-509	4	osa-miR2118d/zma-miR2118d/sbi-miR2118-3p/ata-miR2118c-3p/ata-miR2118d-3p/	22	UAGGGAUUGGAAGCAUCAGGAA	:::: :: ::: ::::::::::	AUCCGUACCCUCCGUAGUCCUU
chr1A:556782480-556783251(-)	683-704	4	osa-miR2118d/zma-miR2118d/sbi-miR2118-3p/ata-miR2118c-3p/ata-miR2118d-3p/	22	UAGGCAUGGGAAGCACCAGGAA	::::::::::: ::: ::::::	AUCCGUACCCUCCGUAGUCCUU
chr1A:556803809-556804494(+)	595-616	3	osa-miR2118d/zma-miR2118d/sbi-miR2118-3p/ata-miR2118c-3p/ata-miR2118d-3p/	22	UAGGCAUAGGAGGCACCAGGAA	::::::: ::::::: ::::::	AUCCGUACCCUCCGUAGUCCUU
chr1A:556813879-556814602(+)	614-635	3	osa-miR2118d/zma-miR2118d/sbi-miR2118-3p/ata-miR2118c-3p/ata-miR2118d-3p/	22	UAGGCAUAGGAGGCACCAGGAA	::::::: ::::::: ::::::	AUCCGUACCCUCCGUAGUCCUU
chr1A:556815712-556816776(+)	974-995	3	osa-miR2118d/zma-miR2118d/sbi-miR2118-3p/ata-miR2118c-3p/ata-miR2118d-3p/	22	UAGGCAUAGGAGGCACCAGGAA	::::::: ::::::: ::::::	AUCCGUACCCUCCGUAGUCCUU
chr1B:21331620-21332280(+)	572-593	3	osa-miR2118d/zma-miR2118d/sbi-miR2118-3p/ata-miR2118c-3p/ata-miR2118d-3p/	22	UAGGCUUGGGAGGCAUUAGGAC	::::: ::::::::::.::::	AUCCGUACCCUCCGUAGUCCUU
chr1B:31912023-31912622(+)	490-511	4	osa-miR2118d/zma-miR2118d/sbi-miR2118-3p/ata-miR2118c-3p/ata-miR2118d-3p/	22	UAGACAUGGGAGGCAUAGGGAA	::: :::::::::::: .::::	AUCCGUACCCUCCGUAGUCCUU
chr1B:32067452-32068177(+)	635-656	4	osa-miR2118d/zma-miR2118d/sbi-miR2118-3p/ata-miR2118c-3p/ata-miR2118d-3p/	22	UAGACAUGGGAGGCAUAGGGAA	::: :::::::::::: .::::	AUCCGUACCCUCCGUAGUCCUU
chr1B:40601325-40601840(+)	426-448	4	osa-miR2118d/zma-miR2118d/sbi-miR2118-3p/ata-miR2118c-3p/ata-miR2118d-3p/	22	UAAGCUUGGGAGGCAUCGAGGAA	:: :: ::::::::::: :::::	AUCCGUACCCUCCGUAG-UCCUU
chr1B:529430736-529431713(-)	908-929	4	osa-miR2118d/zma-miR2118d/sbi-miR2118-3p/ata-miR2118c-3p/ata-miR2118d-3p/	22	UAGGCAUAAGAGGCACCAGGAA	::::::: :::::: ::::::	AUCCGUACCCUCCGUAGUCCUU
chr1B:549706112-549706669(+)	490-511	4	osa-miR2118d/zma-miR2118d/sbi-miR2118-3p/ata-miR2118c-3p/ata-miR2118d-3p/	22	UAGGCAUGGGAUGCGUCGGGAA	::::::::::: ::.::.::::	AUCCGUACCCUCCGUAGUCCUU
chr1B:573753723-573754323(-)	509-530	2.5	osa-miR2118d/zma-miR2118d/sbi-miR2118-3p/ata-miR2118c-3p/ata-miR2118d-3p/	22	UGGGCAUAUGAGGCAUCAGGAA	:.::::: :::::::::::::	AUCCGUACCCUCCGUAGUCCUU
chr1B:595352719-595353446(-)	637-658	4	osa-miR2118d/zma-miR2118d/sbi-miR2118-3p/ata-miR2118c-3p/ata-miR2118d-3p/	22	UAGGCAUAUGAGGCAGCAGGAA	::::::: :::::: ::::::	AUCCGUACCCUCCGUAGUCCUU
chr1B:612988592-612989109(-)	448-469	4	osa-miR2118d/zma-miR2118d/sbi-miR2118-3p/ata-miR2118c-3p/ata-miR2118d-3p/	22	UAGGAUUUAGAGGCAUCAGGAA	:::: : :::::::::::::	AUCCGUACCCUCCGUAGUCCUU
chr1B:640443419-640444014(-)	486-507	3	osa-miR2118d/zma-miR2118d/sbi-miR2118-3p/ata-miR2118c-3p/ata-miR2118d-3p/	22	UAGGCCUGGGAGGCACCAGGAA	::::: ::::::::: ::::::	AUCCGUACCCUCCGUAGUCCUU
chr1B:640470924-640471796(-)	763-784	4	osa-miR2118d/zma-miR2118d/sbi-miR2118-3p/ata-miR2118c-3p/ata-miR2118d-3p/	22	UAGGCAUAUGAGGCAACAGGAA	::::::: :::::: ::::::	AUCCGUACCCUCCGUAGUCCUU
chr1B:640481384-640481866(-)	392-413	2	osa-miR2118d/zma-miR2118d/sbi-miR2118-3p/ata-miR2118c-3p/ata-miR2118d-3p/	22	UAGGCAUAGGGGGCAUCAGGAA	::::::: ::.:::::::::::	AUCCGUACCCUCCGUAGUCCUU
chr1B:666289892-666290554(-)	637-658	3.5	osa-miR2118d/zma-miR2118d/sbi-miR2118-3p/ata-miR2118c-3p/ata-miR2118d-3p/	22	UAGGUAUGGGAGGCAUAGGGAA	::::.::::::::::: .::::	AUCCGUACCCUCCGUAGUCCUU
chr1D:15531131-15531774(-)	509-530	4	osa-miR2118d/zma-miR2118d/sbi-miR2118-3p/ata-miR2118c-3p/ata-miR2118d-3p/	22	UAGGCUCGGGAGGCAUUAGGAC	::::: :::::::::.::::	AUCCGUACCCUCCGUAGUCCUU
chr1D:413351106-413351726(+)	532-553	4	osa-miR2118d/zma-miR2118d/sbi-miR2118-3p/ata-miR2118c-3p/ata-miR2118d-3p/	22	UAGGCAUAGGAGGCACUAGGAA	::::::: ::::::: .:::::	AUCCGUACCCUCCGUAGUCCUU
chr1D:415460637-415461218(+)	491-512	4	osa-miR2118d/zma-miR2118d/sbi-miR2118-3p/ata-miR2118c-3p/ata-miR2118d-3p/	22	UCGAAAUAGGAGGCAUCAGGAA	: : :: ::::::::::::::	AUCCGUACCCUCCGUAGUCCUU
chr1D:424538057-424538625(-)	478-499	2.5	osa-miR2118d/zma-miR2118d/sbi-miR2118-3p/ata-miR2118c-3p/ata-miR2118d-3p/	22	UGGGCAUAUGAGGCAUCAGGAA	:.::::: :::::::::::::	AUCCGUACCCUCCGUAGUCCUU
chr1D:424596718-424597425(-)	617-638	2	osa-miR2118d/zma-miR2118d/sbi-miR2118-3p/ata-miR2118c-3p/ata-miR2118d-3p/	22	UAGGCAUAUGAGGCAUCAGGAA	::::::: :::::::::::::	AUCCGUACCCUCCGUAGUCCUU
chr1D:439086645-439087391(-)	637-658	4	osa-miR2118d/zma-miR2118d/sbi-miR2118-3p/ata-miR2118c-3p/ata-miR2118d-3p/	22	UAGGCAUAUGAGGCAGCAGGAA	::::::: :::::: ::::::	AUCCGUACCCUCCGUAGUCCUU
chr1D:439113111-439114273(-)	1072-1093	4	osa-miR2118d/zma-miR2118d/sbi-miR2118-3p/ata-miR2118c-3p/ata-miR2118d-3p/	22	UAGGCAUAUGAGGCAGCAGGAA	::::::: :::::: ::::::	AUCCGUACCCUCCGUAGUCCUU
chr1D:447460418-447461082(-)	574-595	4	osa-miR2118d/zma-miR2118d/sbi-miR2118-3p/ata-miR2118c-3p/ata-miR2118d-3p/	22	UAGGAUUUAGAGGCAUCAGGAA	:::: : :::::::::::::	AUCCGUACCCUCCGUAGUCCUU
chr1D:447465705-447466404(-)	629-650	4	osa-miR2118d/zma-miR2118d/sbi-miR2118-3p/ata-miR2118c-3p/ata-miR2118d-3p/	22	UAGGGAUUGGAAGCAUCAGGAA	:::: :: ::: ::::::::::	AUCCGUACCCUCCGUAGUCCUU
chr1D:447521191-447521750(-)	490-511	4	osa-miR2118d/zma-miR2118d/sbi-miR2118-3p/ata-miR2118c-3p/ata-miR2118d-3p/	22	UAGGAUUUAGAGGCAUCAGGAA	:::: : :::::::::::::	AUCCGUACCCUCCGUAGUCCUU
chr1D:464296832-464297349(-)	427-448	3	osa-miR2118d/zma-miR2118d/sbi-miR2118-3p/ata-miR2118c-3p/ata-miR2118d-3p/	22	UAGGCAUAGGAGGCACCAGGAA	::::::: ::::::: ::::::	AUCCGUACCCUCCGUAGUCCUU
chr1D:464316556-464317262(-)	597-618	4	osa-miR2118d/zma-miR2118d/sbi-miR2118-3p/ata-miR2118c-3p/ata-miR2118d-3p/	22	GAGGCAUAGGAGGCACCAGGAA	:::::: ::::::: ::::::	AUCCGUACCCUCCGUAGUCCUU
chr1D:464346605-464347227(+)	532-553	3	osa-miR2118d/zma-miR2118d/sbi-miR2118-3p/ata-miR2118c-3p/ata-miR2118d-3p/	22	UAGGCAUAGGAGGCACCAGGAA	::::::: ::::::: ::::::	AUCCGUACCCUCCGUAGUCCUU
chr1D:464374244-464374907(+)	596-617	3	osa-miR2118d/zma-miR2118d/sbi-miR2118-3p/ata-miR2118c-3p/ata-miR2118d-3p/	22	UAGGCAUAGGAGGCACCAGGAA	::::::: ::::::: ::::::	AUCCGUACCCUCCGUAGUCCUU
chr1D:464389985-464390815(+)	740-761	4	osa-miR2118d/zma-miR2118d/sbi-miR2118-3p/ata-miR2118c-3p/ata-miR2118d-3p/	22	UAGGCAUAUGAGGCACCAGGAA	::::::: :::::: ::::::	AUCCGUACCCUCCGUAGUCCUU
chr1D:490522303-490522863(-)	427-447	3	osa-miR2118d/zma-miR2118d/sbi-miR2118-3p/ata-miR2118c-3p/ata-miR2118d-3p/	22	UAGG-AUGGGUGGCAUCAGGAA	:::: ::::: :::::::::::	AUCCGUACCCUCCGUAGUCCUU
chr2A:19308782-19309920(+)	634-655	4	osa-miR2118d/zma-miR2118d/sbi-miR2118-3p/ata-miR2118c-3p/ata-miR2118d-3p/	22	UAGGCAUGUGAGGCAUUGGGAU	:::::::: :::::::..:::	AUCCGUACCCUCCGUAGUCCUU
chr2A:20956413-20956908(+)	405-426	3.5	osa-miR2118d/zma-miR2118d/sbi-miR2118-3p/ata-miR2118c-3p/ata-miR2118d-3p/	22	UGAGUAUGUGAGGCAUCAGGAG	:. :.::: ::::::::::::.	AUCCGUACCCUCCGUAGUCCUU
chr2D:43418730-43419252(-)	434-455	4	osa-miR2118d/zma-miR2118d/sbi-miR2118-3p/ata-miR2118c-3p/ata-miR2118d-3p/	22	UAGGCCUGGGAGGCAACGGGAA	::::: ::::::::: :.::::	AUCCGUACCCUCCGUAGUCCUU
chr2D:598886546-598886998(-)	362-383	3	osa-miR2118d/zma-miR2118d/sbi-miR2118-3p/ata-miR2118c-3p/ata-miR2118d-3p/	22	UAGGAAUGGGAGGUGUCAGGAA	:::: ::::::::..:::::::	AUCCGUACCCUCCGUAGUCCUU
chr2D:598893208-598893648(-)	350-371	4	osa-miR2118d/zma-miR2118d/sbi-miR2118-3p/ata-miR2118c-3p/ata-miR2118d-3p/	22	UAGGAAUGGGAGGUGUCAGGAU	:::: ::::::::..::::::	AUCCGUACCCUCCGUAGUCCUU
chr3A:23194240-23195007(+)	677-698	3.5	osa-miR2118d/zma-miR2118d/sbi-miR2118-3p/ata-miR2118c-3p/ata-miR2118d-3p/	22	GAGGAAUGAGAGGCAUCAGGAG	::: ::: ::::::::::::.	AUCCGUACCCUCCGUAGUCCUU
chr3A:23307538-23308114(+)	488-509	4	osa-miR2118d/zma-miR2118d/sbi-miR2118-3p/ata-miR2118c-3p/ata-miR2118d-3p/	22	UAGGCUUGAGAGGUAUCAGGAC	::::: :: ::::.:::::::	AUCCGUACCCUCCGUAGUCCUU
chr3A:30144670-30145100(+)	362-383	3.5	osa-miR2118d/zma-miR2118d/sbi-miR2118-3p/ata-miR2118c-3p/ata-miR2118d-3p/	22	UGGGGAUGGGAGGCUUCAGGAA	:.:: ::::::::: :::::::	AUCCGUACCCUCCGUAGUCCUU
chr3A:478201-478842(-)	532-553	2	osa-miR2118d/zma-miR2118d/sbi-miR2118-3p/ata-miR2118c-3p/ata-miR2118d-3p/	22	UCGGCUUGGGAGGCAUCAGGAA	: ::: ::::::::::::::::	AUCCGUACCCUCCGUAGUCCUU
chr3A:643907-644899(-)	800-821	4	osa-miR2118d/zma-miR2118d/sbi-miR2118-3p/ata-miR2118c-3p/ata-miR2118d-3p/	22	UAGACUUGGGAGGCAUCAAGAA	::: : :::::::::::: :::	AUCCGUACCCUCCGUAGUCCUU
chr3A:653166-653697(-)	427-448	4	osa-miR2118d/zma-miR2118d/sbi-miR2118-3p/ata-miR2118c-3p/ata-miR2118d-3p/	22	UAGACUUGGGAGGCAUCAAGAA	::: : :::::::::::: :::	AUCCGUACCCUCCGUAGUCCUU
chr3A:692423-693066(-)	553-574	3	osa-miR2118d/zma-miR2118d/sbi-miR2118-3p/ata-miR2118c-3p/ata-miR2118d-3p/	22	UAGGCCUGGGAGGCAUCAAGAA	::::: :::::::::::: :::	AUCCGUACCCUCCGUAGUCCUU
chr3A:886219-886860(-)	551-572	3	osa-miR2118d/zma-miR2118d/sbi-miR2118-3p/ata-miR2118c-3p/ata-miR2118d-3p/	22	UAGGCUUGGGAGGCAUCAAGAA	::::: :::::::::::: :::	AUCCGUACCCUCCGUAGUCCUU
chr3A:952743-953531(-)	679-700	3	osa-miR2118d/zma-miR2118d/sbi-miR2118-3p/ata-miR2118c-3p/ata-miR2118d-3p/	22	UAGGCCUGGGAGGCAUCAAGAA	::::: :::::::::::: :::	AUCCGUACCCUCCGUAGUCCUU
chr3B:20024349-20024991(-)	533-554	4	osa-miR2118d/zma-miR2118d/sbi-miR2118-3p/ata-miR2118c-3p/ata-miR2118d-3p/	22	GAGGCAUGAGAGGUAUCAGGAC	::::::: ::::.:::::::	AUCCGUACCCUCCGUAGUCCUU
chr3B:20071799-20072379(-)	472-493	3.5	osa-miR2118d/zma-miR2118d/sbi-miR2118-3p/ata-miR2118c-3p/ata-miR2118d-3p/	22	GAGGAAUGAGAGGCAUCAGGAG	::: ::: ::::::::::::.	AUCCGUACCCUCCGUAGUCCUU
chr3B:42346092-42346839(+)	657-678	3	osa-miR2118d/zma-miR2118d/sbi-miR2118-3p/ata-miR2118c-3p/ata-miR2118d-3p/	22	UAGGCUCGGGAGGCAUCGGGAA	::::: ::::::::::.::::	AUCCGUACCCUCCGUAGUCCUU
chr3B:683783443-683784189(-)	656-677	4	osa-miR2118d/zma-miR2118d/sbi-miR2118-3p/ata-miR2118c-3p/ata-miR2118d-3p/	22	UAGGACUGCGAGGCGUCAGGAA	:::: :: :::::.:::::::	AUCCGUACCCUCCGUAGUCCUU
chr3D:13600155-13600964(-)	700-721	4	osa-miR2118d/zma-miR2118d/sbi-miR2118-3p/ata-miR2118c-3p/ata-miR2118d-3p/	22	UAGGCUUGAGAGGUAUCAGGAC	::::: :: ::::.:::::::	AUCCGUACCCUCCGUAGUCCUU
chr3D:13813227-13813910(-)	595-616	3.5	osa-miR2118d/zma-miR2118d/sbi-miR2118-3p/ata-miR2118c-3p/ata-miR2118d-3p/	22	GAGGGAUGAGAGGCAUCAGGAG	::: ::: ::::::::::::.	AUCCGUACCCUCCGUAGUCCUU
chr3D:20035192-20035811(-)	519-540	4	osa-miR2118d/zma-miR2118d/sbi-miR2118-3p/ata-miR2118c-3p/ata-miR2118d-3p/	22	UAGGAAUUGGAGGCAUCAGAAA	:::: :: ::::::::::: ::	AUCCGUACCCUCCGUAGUCCUU
chr3D:20320504-20321145(-)	572-593	4	osa-miR2118d/zma-miR2118d/sbi-miR2118-3p/ata-miR2118c-3p/ata-miR2118d-3p/	22	UAGGAAUUGGAGGCAUCAGAAA	:::: :: ::::::::::: ::	AUCCGUACCCUCCGUAGUCCUU
chr3D:24126845-24127516(+)	583-604	4	osa-miR2118d/zma-miR2118d/sbi-miR2118-3p/ata-miR2118c-3p/ata-miR2118d-3p/	22	UAGGAAAAGGAGGCAUCGGGAA	:::: : :::::::::.::::	AUCCGUACCCUCCGUAGUCCUU
chr3D:24221036-24221657(+)	531-552	4	osa-miR2118d/zma-miR2118d/sbi-miR2118-3p/ata-miR2118c-3p/ata-miR2118d-3p/	22	UCGAAUUGGGAGGCAUCAGGAA	: : ::::::::::::::::	AUCCGUACCCUCCGUAGUCCUU
chr3D:24614504-24615103(+)	509-530	3.5	osa-miR2118d/zma-miR2118d/sbi-miR2118-3p/ata-miR2118c-3p/ata-miR2118d-3p/	22	UGGAAUUGGGAGGCAUCAGGAA	:.: ::::::::::::::::	AUCCGUACCCUCCGUAGUCCUU
chr4A:628005382-628006403(+)	931-952	4	osa-miR2118d/zma-miR2118d/sbi-miR2118-3p/ata-miR2118c-3p/ata-miR2118d-3p/	22	UAGGCUUGAGAGGCAUCAGAAA	::::: :: :::::::::: ::	AUCCGUACCCUCCGUAGUCCUU
chr4A:632785446-632786240(+)	677-698	3	osa-miR2118d/zma-miR2118d/sbi-miR2118-3p/ata-miR2118c-3p/ata-miR2118d-3p/	22	UAGCAAUGGGAGGCAUCGGGAA	::: ::::::::::::.::::	AUCCGUACCCUCCGUAGUCCUU
chr4A:644034402-644034964(+)	472-493	4	osa-miR2118d/zma-miR2118d/sbi-miR2118-3p/ata-miR2118c-3p/ata-miR2118d-3p/	22	UAGGCAUGGAAGGCACCAGGAA	::::::::: ::::: ::::::	AUCCGUACCCUCCGUAGUCCUU
chr4A:648590107-648590663(-)	489-510	4	osa-miR2118d/zma-miR2118d/sbi-miR2118-3p/ata-miR2118c-3p/ata-miR2118d-3p/	22	UAGGAAUAGGAGGCAGCAGGAA	:::: :: ::::::: ::::::	AUCCGUACCCUCCGUAGUCCUU
chr4A:666505382-666505934(-)	443-464	3	osa-miR2118d/zma-miR2118d/sbi-miR2118-3p/ata-miR2118c-3p/ata-miR2118d-3p/	22	UAGGCCUGAGAGGCAUCAGGGA	::::: :: :::::::::::.:	AUCCGUACCCUCCGUAGUCCUU
chr4A:666934566-666935331(+)	656-677	4	osa-miR2118d/zma-miR2118d/sbi-miR2118-3p/ata-miR2118c-3p/ata-miR2118d-3p/	22	UUGGCUUGAGAGGCAUCAGGGA	: ::: :: :::::::::::.:	AUCCGUACCCUCCGUAGUCCUU
chr4A:687348265-687349095(-)	742-763	4	osa-miR2118d/zma-miR2118d/sbi-miR2118-3p/ata-miR2118c-3p/ata-miR2118d-3p/	22	UAGGCUUGAAAGGCAUCAGGAA	::::: :: ::::::::::::	AUCCGUACCCUCCGUAGUCCUU
chr4A:688964727-688965366(-)	551-572	4	osa-miR2118d/zma-miR2118d/sbi-miR2118-3p/ata-miR2118c-3p/ata-miR2118d-3p/	22	UGGGAACCGGAGGCAUCAGGAG	:.:: : :::::::::::::.	AUCCGUACCCUCCGUAGUCCUU
chr4A:694944767-694945452(-)	595-616	4	osa-miR2118d/zma-miR2118d/sbi-miR2118-3p/ata-miR2118c-3p/ata-miR2118d-3p/	22	UAGGAAUUAGAGGCAUCAGGAC	:::: :: ::::::::::::	AUCCGUACCCUCCGUAGUCCUU
chr4A:698090756-698091376(-)	511-532	4	osa-miR2118d/zma-miR2118d/sbi-miR2118-3p/ata-miR2118c-3p/ata-miR2118d-3p/	22	UAUGACUGGGAGGCAUCGGGAA	:: : :::::::::::.::::	AUCCGUACCCUCCGUAGUCCUU
chr4A:723798928-723799560(-)	542-563	3.5	osa-miR2118d/zma-miR2118d/sbi-miR2118-3p/ata-miR2118c-3p/ata-miR2118d-3p/	22	UGAGAAUAGGAGGCAUCAGGAA	:. : :: ::::::::::::::	AUCCGUACCCUCCGUAGUCCUU
chr4B:22904940-22905583(-)	553-575	2.5	osa-miR2118d/zma-miR2118d/sbi-miR2118-3p/ata-miR2118c-3p/ata-miR2118d-3p/	22	UGGGCAUGGGAGGCAUCCAGGAA	:.::::::::::::::: :::::	AUCCGUACCCUCCGUAG-UCCUU
chr4B:22906597-22907323(-)	638-659	4	osa-miR2118d/zma-miR2118d/sbi-miR2118-3p/ata-miR2118c-3p/ata-miR2118d-3p/	22	UAAGCAUGGGAGGCAUAGGGAA	:: ::::::::::::: .::::	AUCCGUACCCUCCGUAGUCCUU
chr4B:35183613-35184168(-)	488-509	3.5	osa-miR2118d/zma-miR2118d/sbi-miR2118-3p/ata-miR2118c-3p/ata-miR2118d-3p/	22	UGGGCAUGGGAGGCCUUAGGAA	:.:::::::::::: :.:::::	AUCCGUACCCUCCGUAGUCCUU
chr4B:35210441-35211187(-)	656-677	2.5	osa-miR2118d/zma-miR2118d/sbi-miR2118-3p/ata-miR2118c-3p/ata-miR2118d-3p/	22	UGGGCAUGAGAGGCAUUAGGAA	:.:::::: :::::::.:::::	AUCCGUACCCUCCGUAGUCCUU
chr4D:12550357-12551170(-)	722-743	2.5	osa-miR2118d/zma-miR2118d/sbi-miR2118-3p/ata-miR2118c-3p/ata-miR2118d-3p/	22	UAAGCAUGGGAGGCAUCGGGAG	:: ::::::::::::::.:::.	AUCCGUACCCUCCGUAGUCCUU
chr5A:11528072-11528587(-)	448-469	4	osa-miR2118d/zma-miR2118d/sbi-miR2118-3p/ata-miR2118c-3p/ata-miR2118d-3p/	22	UAGGCAUAGAAGGCAUCGGGAA	::::::: : :::::::.::::	AUCCGUACCCUCCGUAGUCCUU
chr5A:17390169-17390813(+)	575-596	4	osa-miR2118d/zma-miR2118d/sbi-miR2118-3p/ata-miR2118c-3p/ata-miR2118d-3p/	22	UAGGCAUAGAAGGCGUCAGGAA	::::::: : ::::.:::::::	AUCCGUACCCUCCGUAGUCCUU
chr5A:17436955-17437617(+)	574-595	4	osa-miR2118d/zma-miR2118d/sbi-miR2118-3p/ata-miR2118c-3p/ata-miR2118d-3p/	22	UUGGCAUAGGAGGCUUCAGGAA	: ::::: :::::: :::::::	AUCCGUACCCUCCGUAGUCCUU
chr5A:554752513-554753029(+)	427-449	3	osa-miR2118d/zma-miR2118d/sbi-miR2118-3p/ata-miR2118c-3p/ata-miR2118d-3p/	22	UAGGCAUGGAAGGCAUACAGGAA	::::::::: :::::: ::::::	AUCCGUACCCUCCGUA-GUCCUU
chr5A:554852452-554853154(+)	592-614	3	osa-miR2118d/zma-miR2118d/sbi-miR2118-3p/ata-miR2118c-3p/ata-miR2118d-3p/	22	UAGGCAUUGGAGGCAUACAGGAA	::::::: :::::::: ::::::	AUCCGUACCCUCCGUA-GUCCUU
chr5A:559089641-559090199(-)	470-491	4	osa-miR2118d/zma-miR2118d/sbi-miR2118-3p/ata-miR2118c-3p/ata-miR2118d-3p/	22	UAGGACUGGGAGGCACCAGGAA	:::: ::::::::: ::::::	AUCCGUACCCUCCGUAGUCCUU
chr5A:631705505-631706249(+)	677-698	3.5	osa-miR2118d/zma-miR2118d/sbi-miR2118-3p/ata-miR2118c-3p/ata-miR2118d-3p/	22	UGGGCAUGGGAGGCAUGGGGAA	:.:::::::::::::: .::::	AUCCGUACCCUCCGUAGUCCUU
chr5B:13698453-13699096(-)	553-574	3	osa-miR2118d/zma-miR2118d/sbi-miR2118-3p/ata-miR2118c-3p/ata-miR2118d-3p/	22	UAGGCAUAGGAGGCACCAGGAA	::::::: ::::::: ::::::	AUCCGUACCCUCCGUAGUCCUU
chr5B:13814598-13815389(-)	701-722	2.5	osa-miR2118d/zma-miR2118d/sbi-miR2118-3p/ata-miR2118c-3p/ata-miR2118d-3p/	22	UGAGCAUGAGAGGCAUCAGGAA	:. ::::: :::::::::::::	AUCCGUACCCUCCGUAGUCCUU
chr5B:14248496-14249096(-)	488-509	4	osa-miR2118d/zma-miR2118d/sbi-miR2118-3p/ata-miR2118c-3p/ata-miR2118d-3p/	22	UAGACAUGGAAGGCAUCAGGAU	::: ::::: :::::::::::	AUCCGUACCCUCCGUAGUCCUU
chr5B:533991030-533991998(+)	739-761	3	osa-miR2118d/zma-miR2118d/sbi-miR2118-3p/ata-miR2118c-3p/ata-miR2118d-3p/	22	UAGGCAUUGGAGGCAUACAGGAA	::::::: :::::::: ::::::	AUCCGUACCCUCCGUA-GUCCUU
chr5B:534033052-534033689(+)	527-549	3.5	osa-miR2118d/zma-miR2118d/sbi-miR2118-3p/ata-miR2118c-3p/ata-miR2118d-3p/	22	UAGGCAUUGGAGGCAUACAGGAG	::::::: :::::::: :::::.	AUCCGUACCCUCCGUA-GUCCUU
chr5B:539303121-539303675(-)	464-485	2	osa-miR2118d/zma-miR2118d/sbi-miR2118-3p/ata-miR2118c-3p/ata-miR2118d-3p/	22	UAGGGCUGGGAGGCAUCAGGAA	:::: ::::::::::::::::	AUCCGUACCCUCCGUAGUCCUU
chr5B:545089784-545090518(-)	686-707	4	osa-miR2118d/zma-miR2118d/sbi-miR2118-3p/ata-miR2118c-3p/ata-miR2118d-3p/	22	UAGGCCUGAGAGGCAUCAGAAA	::::: :: :::::::::: ::	AUCCGUACCCUCCGUAGUCCUU
chr5B:547911026-547911737(+)	644-665	4	osa-miR2118d/zma-miR2118d/sbi-miR2118-3p/ata-miR2118c-3p/ata-miR2118d-3p/	22	UAGGCAUGGGAAGCAUUAGGAU	::::::::::: ::::.::::	AUCCGUACCCUCCGUAGUCCUU
chr5B:554775900-554776438(-)	448-469	4	osa-miR2118d/zma-miR2118d/sbi-miR2118-3p/ata-miR2118c-3p/ata-miR2118d-3p/	22	UCGGCAUGGAGGGCAUCAGGAA	: ::::::: .:::::::::::	AUCCGUACCCUCCGUAGUCCUU
chr5B:592203543-592204228(+)	593-614	4	osa-miR2118d/zma-miR2118d/sbi-miR2118-3p/ata-miR2118c-3p/ata-miR2118d-3p/	22	UUGGCAUGAGCGGCAUCAGGAA	: :::::: : :::::::::::	AUCCGUACCCUCCGUAGUCCUU
chr5B:634088395-634088995(+)	490-511	4	osa-miR2118d/zma-miR2118d/sbi-miR2118-3p/ata-miR2118c-3p/ata-miR2118d-3p/	22	UGGGUAUGGAAGGCAUCAGGGA	:.::.:::: ::::::::::.:	AUCCGUACCCUCCGUAGUCCUU
chr5B:672165192-672165792(-)	510-531	2	osa-miR2118d/zma-miR2118d/sbi-miR2118-3p/ata-miR2118c-3p/ata-miR2118d-3p/	22	UAGGUGUGCGAGGCAUCAGGAA	::::..:: :::::::::::::	AUCCGUACCCUCCGUAGUCCUU
chr5B:674495940-674496447(+)	417-438	2.5	osa-miR2118d/zma-miR2118d/sbi-miR2118-3p/ata-miR2118c-3p/ata-miR2118d-3p/	22	UAGGCGUGUGAGGCAUCAGGAU	:::::.:: ::::::::::::	AUCCGUACCCUCCGUAGUCCUU
chr5B:704980722-704981319(+)	488-509	4	osa-miR2118d/zma-miR2118d/sbi-miR2118-3p/ata-miR2118c-3p/ata-miR2118d-3p/	22	UAGGCAUUGAAGGCAUUAGGAA	::::::: : ::::::.:::::	AUCCGUACCCUCCGUAGUCCUU
chr5D:438834302-438835134(+)	741-763	3	osa-miR2118d/zma-miR2118d/sbi-miR2118-3p/ata-miR2118c-3p/ata-miR2118d-3p/	22	UAGGCAUUGGAGGCAUACAGGAA	::::::: :::::::: ::::::	AUCCGUACCCUCCGUA-GUCCUU
chr5D:438839117-438839569(+)	361-383	4	osa-miR2118d/zma-miR2118d/sbi-miR2118-3p/ata-miR2118c-3p/ata-miR2118d-3p/	22	UAGGUGUUGGAGGCAUCCAGGAA	::::..: ::::::::: :::::	AUCCGUACCCUCCGUAG-UCCUU
chr5D:438926893-438927513(+)	510-532	3.5	osa-miR2118d/zma-miR2118d/sbi-miR2118-3p/ata-miR2118c-3p/ata-miR2118d-3p/	22	UAGGCAUUGGAGGCAUACAGGAG	::::::: :::::::: :::::.	AUCCGUACCCUCCGUA-GUCCUU
chr5D:443016485-443017017(-)	444-465	2	osa-miR2118d/zma-miR2118d/sbi-miR2118-3p/ata-miR2118c-3p/ata-miR2118d-3p/	22	UAGGGCUGGGAGGCAUCAGGAA	:::: ::::::::::::::::	AUCCGUACCCUCCGUAGUCCUU
chr5D:446768733-446769456(-)	614-635	3	osa-miR2118d/zma-miR2118d/sbi-miR2118-3p/ata-miR2118c-3p/ata-miR2118d-3p/	22	UAGGCCUGAGAGGCAUCGGGAA	::::: :: ::::::::.::::	AUCCGUACCCUCCGUAGUCCUU
chr5D:447985731-447986561(+)	742-763	4	osa-miR2118d/zma-miR2118d/sbi-miR2118-3p/ata-miR2118c-3p/ata-miR2118d-3p/	22	UCGGAAUAGGAGGCAUUAGGAA	: :: :: ::::::::.:::::	AUCCGUACCCUCCGUAGUCCUU
chr5D:451688049-451688816(-)	677-698	3	osa-miR2118d/zma-miR2118d/sbi-miR2118-3p/ata-miR2118c-3p/ata-miR2118d-3p/	22	UAGGAAGGAGAGGCAUCAGGAA	:::: : : :::::::::::::	AUCCGUACCCUCCGUAGUCCUU
chr5D:454083189-454083761(-)	482-503	3.5	osa-miR2118d/zma-miR2118d/sbi-miR2118-3p/ata-miR2118c-3p/ata-miR2118d-3p/	22	UGGGCAUGGAGGGCAUCAGGAA	:.::::::: .:::::::::::	AUCCGUACCCUCCGUAGUCCUU
chr5D:482603180-482603905(+)	637-658	4	osa-miR2118d/zma-miR2118d/sbi-miR2118-3p/ata-miR2118c-3p/ata-miR2118d-3p/	22	UUGGCAUGAGCGGCAUCAGGAA	: :::::: : :::::::::::	AUCCGUACCCUCCGUAGUCCUU
chr5D:503877178-503878122(+)	835-856	4	osa-miR2118d/zma-miR2118d/sbi-miR2118-3p/ata-miR2118c-3p/ata-miR2118d-3p/	22	UGGGCGUGGGAGGCAUGGGGAA	:.:::.:::::::::: .::::	AUCCGUACCCUCCGUAGUCCUU
chr5D:503882088-503882796(+)	620-641	3.5	osa-miR2118d/zma-miR2118d/sbi-miR2118-3p/ata-miR2118c-3p/ata-miR2118d-3p/	22	UGGGCAUGGGAGGCAUGGGGAA	:.:::::::::::::: .::::	AUCCGUACCCUCCGUAGUCCUU
chr5D:504037909-504038508(+)	553-574	3	osa-miR2118d/zma-miR2118d/sbi-miR2118-3p/ata-miR2118c-3p/ata-miR2118d-3p/	22	UGAGCGUGGGAGGCAUCGGGAA	:. ::.:::::::::::.::::	AUCCGUACCCUCCGUAGUCCUU
chr5D:504193153-504193878(+)	616-637	4	osa-miR2118d/zma-miR2118d/sbi-miR2118-3p/ata-miR2118c-3p/ata-miR2118d-3p/	22	UGGGCGUGGGAGGCAUGGGGAA	:.:::.:::::::::: .::::	AUCCGUACCCUCCGUAGUCCUU
chr5D:504930257-504930900(+)	595-616	3.5	osa-miR2118d/zma-miR2118d/sbi-miR2118-3p/ata-miR2118c-3p/ata-miR2118d-3p/	22	UGGGCAUGGAAGGCAUCAGGGA	:.::::::: ::::::::::.:	AUCCGUACCCUCCGUAGUCCUU
chr6A:17695597-17696324(-)	637-658	4	osa-miR2118d/zma-miR2118d/sbi-miR2118-3p/ata-miR2118c-3p/ata-miR2118d-3p/	22	UAAGCAUGGGAGGUACCAGGAA	:: ::::::::::.: ::::::	AUCCGUACCCUCCGUAGUCCUU
chr6A:17706192-17706896(-)	595-616	3	osa-miR2118d/zma-miR2118d/sbi-miR2118-3p/ata-miR2118c-3p/ata-miR2118d-3p/	22	UAAGCAUGGGAGGUGUCAGGAA	:: ::::::::::..:::::::	AUCCGUACCCUCCGUAGUCCUU
chr6A:24240317-24240857(+)	470-491	4	osa-miR2118d/zma-miR2118d/sbi-miR2118-3p/ata-miR2118c-3p/ata-miR2118d-3p/	22	UGGGAGUAGGAGGCGUCAGGAA	:.:: .: ::::::.:::::::	AUCCGUACCCUCCGUAGUCCUU
chr6A:54182004-54182750(+)	656-677	4	osa-miR2118d/zma-miR2118d/sbi-miR2118-3p/ata-miR2118c-3p/ata-miR2118d-3p/	22	UAGGCUUGAGAGCCAUCAGGAA	::::: :: ::: :::::::::	AUCCGUACCCUCCGUAGUCCUU
chr6A:558959710-558960376(-)	557-578	4	osa-miR2118d/zma-miR2118d/sbi-miR2118-3p/ata-miR2118c-3p/ata-miR2118d-3p/	22	UAGGCAUGAGAGGCAUGGGGAA	:::::::: ::::::: .::::	AUCCGUACCCUCCGUAGUCCUU
chr6A:588597241-588597903(-)	574-595	3.5	osa-miR2118d/zma-miR2118d/sbi-miR2118-3p/ata-miR2118c-3p/ata-miR2118d-3p/	22	UGGGCAUGGAAGGCAUUAGGAA	:.::::::: ::::::.:::::	AUCCGUACCCUCCGUAGUCCUU
chr6A:7060205-7060743(+)	447-469	4	osa-miR2118d/zma-miR2118d/sbi-miR2118-3p/ata-miR2118c-3p/ata-miR2118d-3p/	22	UAGGCUUGAGAGGCAAUCAGGAA	::::: :: :::::: :::::::	AUCCGUACCCUCCGU-AGUCCUU
chr6B:100298575-100299113(-)	448-469	4	osa-miR2118d/zma-miR2118d/sbi-miR2118-3p/ata-miR2118c-3p/ata-miR2118d-3p/	22	UCGGCUUGGGAGGCAUUGGGAA	: ::: ::::::::::..::::	AUCCGUACCCUCCGUAGUCCUU
chr6B:102066838-102067335(+)	469-490	3	osa-miR2118d/zma-miR2118d/sbi-miR2118-3p/ata-miR2118c-3p/ata-miR2118d-3p/	22	UAGGCAUAGGAGGCACCAGGAA	::::::: ::::::: ::::::	AUCCGUACCCUCCGUAGUCCUU
chr6B:10616675-10617339(+)	574-595	4	osa-miR2118d/zma-miR2118d/sbi-miR2118-3p/ata-miR2118c-3p/ata-miR2118d-3p/	22	UAGGCAUGGGAGACAUAAGGAA	:::::::::::: ::: :::::	AUCCGUACCCUCCGUAGUCCUU
chr6B:124992042-124992725(-)	593-614	3	osa-miR2118d/zma-miR2118d/sbi-miR2118-3p/ata-miR2118c-3p/ata-miR2118d-3p/	22	UAGGAAUAGGAGGCAUCAGGAU	:::: :: :::::::::::::	AUCCGUACCCUCCGUAGUCCUU
chr6B:155198869-155199344(+)	385-406	4	osa-miR2118d/zma-miR2118d/sbi-miR2118-3p/ata-miR2118c-3p/ata-miR2118d-3p/	22	UAGGAUUUGGAGGCAUUAGGAA	:::: : ::::::::.:::::	AUCCGUACCCUCCGUAGUCCUU
chr6B:155332721-155333404(+)	593-614	4	osa-miR2118d/zma-miR2118d/sbi-miR2118-3p/ata-miR2118c-3p/ata-miR2118d-3p/	22	UUGGAAUAGGAGGCAUUAGGAA	: :: :: ::::::::.:::::	AUCCGUACCCUCCGUAGUCCUU
chr6B:29994289-29994993(-)	616-637	4	osa-miR2118d/zma-miR2118d/sbi-miR2118-3p/ata-miR2118c-3p/ata-miR2118d-3p/	22	UAUGCAUGGGAGGCGUCGGGAU	:: :::::::::::.::.:::	AUCCGUACCCUCCGUAGUCCUU
chr6B:30069958-30070578(-)	530-551	3	osa-miR2118d/zma-miR2118d/sbi-miR2118-3p/ata-miR2118c-3p/ata-miR2118d-3p/	22	UAAGCAUGGGAGGUGUCAGGAA	:: ::::::::::..:::::::	AUCCGUACCCUCCGUAGUCCUU
chr6B:30129142-30129959(-)	727-748	3.5	osa-miR2118d/zma-miR2118d/sbi-miR2118-3p/ata-miR2118c-3p/ata-miR2118d-3p/	22	UGAGCAUGGGAGGCAUCAUGAA	:. ::::::::::::::: :::	AUCCGUACCCUCCGUAGUCCUU
chr6B:30145596-30146374(-)	670-691	3.5	osa-miR2118d/zma-miR2118d/sbi-miR2118-3p/ata-miR2118c-3p/ata-miR2118d-3p/	22	UGAGCAUGGGAGGCAUCAAGAA	:. ::::::::::::::: :::	AUCCGUACCCUCCGUAGUCCUU
chr6B:42487152-42487814(+)	553-574	2.5	osa-miR2118d/zma-miR2118d/sbi-miR2118-3p/ata-miR2118c-3p/ata-miR2118d-3p/	22	UGAGCUUGGGAGGCAUCAGGAA	:. :: ::::::::::::::::	AUCCGUACCCUCCGUAGUCCUU
chr6B:42739126-42739668(-)	473-494	3.5	osa-miR2118d/zma-miR2118d/sbi-miR2118-3p/ata-miR2118c-3p/ata-miR2118d-3p/	22	UGAGAAUAGGAGGCAUCAGGAA	:. : :: ::::::::::::::	AUCCGUACCCUCCGUAGUCCUU
chr6B:623338670-623339564(-)	784-805	3	osa-miR2118d/zma-miR2118d/sbi-miR2118-3p/ata-miR2118c-3p/ata-miR2118d-3p/	22	UAGGGAUGAGAGGUAUCAGGAA	:::: ::: ::::.::::::::	AUCCGUACCCUCCGUAGUCCUU
chr6B:623356887-623357550(-)	574-594	4	osa-miR2118d/zma-miR2118d/sbi-miR2118-3p/ata-miR2118c-3p/ata-miR2118d-3p/	22	UAGGCUUGAGAGGCAU-AGGAA	::::: :: ::::::: :::::	AUCCGUACCCUCCGUAGUCCUU
chr6B:623441573-623442235(-)	553-574	3	osa-miR2118d/zma-miR2118d/sbi-miR2118-3p/ata-miR2118c-3p/ata-miR2118d-3p/	22	UAGGCAUGAGAGGCAUGAGGAA	:::::::: ::::::: :::::	AUCCGUACCCUCCGUAGUCCUU
chr6B:665671031-665671775(-)	635-656	3	osa-miR2118d/zma-miR2118d/sbi-miR2118-3p/ata-miR2118c-3p/ata-miR2118d-3p/	22	UAGGCAUAGAAGGCAUCAGGAA	::::::: : ::::::::::::	AUCCGUACCCUCCGUAGUCCUU
chr6B:715178013-715178718(-)	617-638	3.5	osa-miR2118d/zma-miR2118d/sbi-miR2118-3p/ata-miR2118c-3p/ata-miR2118d-3p/	22	UAGCUUUGGGAGGCAUUAGGAA	::: . ::::::::::.:::::	AUCCGUACCCUCCGUAGUCCUU
chr6D:17132618-17133402(-)	611-632	3	osa-miR2118d/zma-miR2118d/sbi-miR2118-3p/ata-miR2118c-3p/ata-miR2118d-3p/	22	UAAGCAUGGGAGGUGUCAGGAA	:: ::::::::::..:::::::	AUCCGUACCCUCCGUAGUCCUU
chr6D:17136953-17137719(-)	676-697	3.5	osa-miR2118d/zma-miR2118d/sbi-miR2118-3p/ata-miR2118c-3p/ata-miR2118d-3p/	22	UGAGCAUGGGAGGCAUCAAGAA	:. ::::::::::::::: :::	AUCCGUACCCUCCGUAGUCCUU
chr6D:17156869-17157599(-)	622-643	3.5	osa-miR2118d/zma-miR2118d/sbi-miR2118-3p/ata-miR2118c-3p/ata-miR2118d-3p/	22	UGAGCAUGGGAGGCAUCAAGAA	:. ::::::::::::::: :::	AUCCGUACCCUCCGUAGUCCUU
chr6D:17165429-17165946(-)	427-448	3.5	osa-miR2118d/zma-miR2118d/sbi-miR2118-3p/ata-miR2118c-3p/ata-miR2118d-3p/	22	UGAGCAUGGGAGGCAUCAAGAA	:. ::::::::::::::: :::	AUCCGUACCCUCCGUAGUCCUU
chr6D:413348801-413349442(-)	532-553	4	osa-miR2118d/zma-miR2118d/sbi-miR2118-3p/ata-miR2118c-3p/ata-miR2118d-3p/	22	UAGGCUUGAGAGGCAUGAGGAA	::::: :: ::::::: :::::	AUCCGUACCCUCCGUAGUCCUU
chr6D:468951213-468951796(-)	493-514	2.5	osa-miR2118d/zma-miR2118d/sbi-miR2118-3p/ata-miR2118c-3p/ata-miR2118d-3p/	22	UAGGUUUGGGAGGCAUUAGGAA	::::. ::::::::::.:::::	AUCCGUACCCUCCGUAGUCCUU
chr6D:468992548-468993252(-)	614-635	3	osa-miR2118d/zma-miR2118d/sbi-miR2118-3p/ata-miR2118c-3p/ata-miR2118d-3p/	22	UAGGCAUAGAAGGCAUCAGGAA	::::::: : ::::::::::::	AUCCGUACCCUCCGUAGUCCUU
chr6D:46910014-46910720(+)	616-637	3	osa-miR2118d/zma-miR2118d/sbi-miR2118-3p/ata-miR2118c-3p/ata-miR2118d-3p/	22	UAGGAAUAGGAGGCAUCAGGAC	:::: :: :::::::::::::	AUCCGUACCCUCCGUAGUCCUU
chr6D:55077096-55078052(-)	887-908	4	osa-miR2118d/zma-miR2118d/sbi-miR2118-3p/ata-miR2118c-3p/ata-miR2118d-3p/	22	UAGGAAUAGGAGCCAUCAGGAA	:::: :: :::: :::::::::	AUCCGUACCCUCCGUAGUCCUU
chr6D:55313764-55314429(-)	575-596	4	osa-miR2118d/zma-miR2118d/sbi-miR2118-3p/ata-miR2118c-3p/ata-miR2118d-3p/	22	UAGGAAUAGGAGACAUCAGGAA	:::: :: :::: :::::::::	AUCCGUACCCUCCGUAGUCCUU
chr6D:80605905-80606612(+)	617-638	4	osa-miR2118d/zma-miR2118d/sbi-miR2118-3p/ata-miR2118c-3p/ata-miR2118d-3p/	22	UAGGAUUCAGAGGCAUCAGGAA	:::: : :::::::::::::	AUCCGUACCCUCCGUAGUCCUU
chr6D:81110163-81110806(+)	553-574	4	osa-miR2118d/zma-miR2118d/sbi-miR2118-3p/ata-miR2118c-3p/ata-miR2118d-3p/	22	UAGGAUUUGGAGGCAUUAGGAA	:::: : ::::::::.:::::	AUCCGUACCCUCCGUAGUCCUU
chr6D:81171628-81172506(+)	790-811	4	osa-miR2118d/zma-miR2118d/sbi-miR2118-3p/ata-miR2118c-3p/ata-miR2118d-3p/	22	UUGGAAUUGGAGGCAUUAGGAA	: :: :: ::::::::.:::::	AUCCGUACCCUCCGUAGUCCUU
chr6D:81212090-81212935(+)	818-839	4	osa-miR2118d/zma-miR2118d/sbi-miR2118-3p/ata-miR2118c-3p/ata-miR2118d-3p/	22	UUGGAAUUGGAGGCAUUAGGAA	: :: :: ::::::::.:::::	AUCCGUACCCUCCGUAGUCCUU
chr7A:112140559-112141137(-)	487-509	4	osa-miR2118d/zma-miR2118d/sbi-miR2118-3p/ata-miR2118c-3p/ata-miR2118d-3p/	22	UAGACCUGGGAGGCAUCAGAGAA	::: : ::::::::::::: :::	AUCCGUACCCUCCGUAGUC-CUU
chr7A:112338052-112339027(+)	865-887	2	osa-miR2118d/zma-miR2118d/sbi-miR2118-3p/ata-miR2118c-3p/ata-miR2118d-3p/	22	UAGGCAUGGGAGGCAUCAGAGAA	::::::::::::::::::: :::	AUCCGUACCCUCCGUAGUC-CUU
chr7A:112355390-112356302(+)	823-845	4	osa-miR2118d/zma-miR2118d/sbi-miR2118-3p/ata-miR2118c-3p/ata-miR2118d-3p/	22	UAGGAAUGGGAGGCAUCGGAGAA	:::: ::::::::::::.: :::	AUCCGUACCCUCCGUAGUC-CUU
chr7A:112690368-112691076(+)	638-660	4	osa-miR2118d/zma-miR2118d/sbi-miR2118-3p/ata-miR2118c-3p/ata-miR2118d-3p/	22	UAGGCAUGGGAGGCAUUGGAGAA	::::::::::::::::..: :::	AUCCGUACCCUCCGUAGUC-CUU
chr7A:175903476-175904012(+)	469-490	4	osa-miR2118d/zma-miR2118d/sbi-miR2118-3p/ata-miR2118c-3p/ata-miR2118d-3p/	22	UAGGGAUGAGAGGCAUCCGGAA	:::: ::: :::::::: ::::	AUCCGUACCCUCCGUAGUCCUU
chr7A:36930359-36930958(+)	511-532	3	osa-miR2118d/zma-miR2118d/sbi-miR2118-3p/ata-miR2118c-3p/ata-miR2118d-3p/	22	UAGGCUUGGAAGGCAUCAGGAA	::::: ::: ::::::::::::	AUCCGUACCCUCCGUAGUCCUU
chr7A:54931537-54932113(+)	467-488	4	osa-miR2118d/zma-miR2118d/sbi-miR2118-3p/ata-miR2118c-3p/ata-miR2118d-3p/	22	UAGGCUUGGGAGGCAUUGGGGA	::::: ::::::::::..::.:	AUCCGUACCCUCCGUAGUCCUU
chr7A:647303083-647303684(-)	511-532	3	osa-miR2118d/zma-miR2118d/sbi-miR2118-3p/ata-miR2118c-3p/ata-miR2118d-3p/	22	UAGGCAUGAGAGGUAUUAGGAA	:::::::: ::::.::.:::::	AUCCGUACCCUCCGUAGUCCUU
chr7A:648741182-648741699(+)	448-469	4	osa-miR2118d/zma-miR2118d/sbi-miR2118-3p/ata-miR2118c-3p/ata-miR2118d-3p/	22	UCAGCAUGCGAGGCAUCAGGAU	: ::::: ::::::::::::	AUCCGUACCCUCCGUAGUCCUU
chr7A:652519104-652520053(-)	840-861	4	osa-miR2118d/zma-miR2118d/sbi-miR2118-3p/ata-miR2118c-3p/ata-miR2118d-3p/	22	UCGGCAUGGGAGGUAUUAGGAU	: :::::::::::.::.::::	AUCCGUACCCUCCGUAGUCCUU
chr7A:690067896-690068558(-)	572-593	4	osa-miR2118d/zma-miR2118d/sbi-miR2118-3p/ata-miR2118c-3p/ata-miR2118d-3p/	22	UAGACAUGGGAAGCAUUAGGAA	::: ::::::: ::::.:::::	AUCCGUACCCUCCGUAGUCCUU
chr7A:690071495-690072202(-)	616-637	2.5	osa-miR2118d/zma-miR2118d/sbi-miR2118-3p/ata-miR2118c-3p/ata-miR2118d-3p/	22	UAGAUAUGGGAGGCAUUAGGAA	::: .:::::::::::.:::::	AUCCGUACCCUCCGUAGUCCUU
chr7B:138718112-138718762(+)	581-602	4	osa-miR2118d/zma-miR2118d/sbi-miR2118-3p/ata-miR2118c-3p/ata-miR2118d-3p/	22	UAGGGCUGAGAGGCAUCGGGAA	:::: :: ::::::::.::::	AUCCGUACCCUCCGUAGUCCUU
chr7B:155896542-155897141(-)	511-532	3	osa-miR2118d/zma-miR2118d/sbi-miR2118-3p/ata-miR2118c-3p/ata-miR2118d-3p/	22	UAGGCUUGAGAGGCAUCAGGAU	::::: :: ::::::::::::	AUCCGUACCCUCCGUAGUCCUU
chr7B:412818208-412818893(+)	595-616	2.5	osa-miR2118d/zma-miR2118d/sbi-miR2118-3p/ata-miR2118c-3p/ata-miR2118d-3p/	22	UGGGCAUAAGAGGCAUCAGGAA	:.::::: :::::::::::::	AUCCGUACCCUCCGUAGUCCUU
chr7B:610097043-610097781(+)	648-669	3.5	osa-miR2118d/zma-miR2118d/sbi-miR2118-3p/ata-miR2118c-3p/ata-miR2118d-3p/	22	UAGGAGUGGUAGGCAUCAGGAA	:::: .::: ::::::::::::	AUCCGUACCCUCCGUAGUCCUU
chr7B:612321743-612322300(+)	488-509	2	osa-miR2118d/zma-miR2118d/sbi-miR2118-3p/ata-miR2118c-3p/ata-miR2118d-3p/	22	UCGGCAUGAGAGGCAUCAGGAA	: :::::: :::::::::::::	AUCCGUACCCUCCGUAGUCCUU
chr7B:614344642-614345454(+)	764-785	4	osa-miR2118d/zma-miR2118d/sbi-miR2118-3p/ata-miR2118c-3p/ata-miR2118d-3p/	22	UUGGCUUGAGAGGCAUCAGGAC	: ::: :: ::::::::::::	AUCCGUACCCUCCGUAGUCCUU
chr7B:614418264-614419052(+)	679-700	4	osa-miR2118d/zma-miR2118d/sbi-miR2118-3p/ata-miR2118c-3p/ata-miR2118d-3p/	22	UUGACUUGGGAGGCAUCAGGAC	: : : :::::::::::::::	AUCCGUACCCUCCGUAGUCCUU
chr7B:616284062-616284792(-)	621-642	4	osa-miR2118d/zma-miR2118d/sbi-miR2118-3p/ata-miR2118c-3p/ata-miR2118d-3p/	22	UUGGCAUGAGAGGUAUCAGGAC	: :::::: ::::.:::::::	AUCCGUACCCUCCGUAGUCCUU
chr7B:616398538-616399389(-)	742-763	4	osa-miR2118d/zma-miR2118d/sbi-miR2118-3p/ata-miR2118c-3p/ata-miR2118d-3p/	22	UUGGCAUGAGAGGUAUCAGGAC	: :::::: ::::.:::::::	AUCCGUACCCUCCGUAGUCCUU
chr7B:616493294-616493937(-)	553-574	3	osa-miR2118d/zma-miR2118d/sbi-miR2118-3p/ata-miR2118c-3p/ata-miR2118d-3p/	22	UUGGUGUGGGAGGCAUCGGGAA	: ::..:::::::::::.::::	AUCCGUACCCUCCGUAGUCCUU
chr7B:633898656-633899339(-)	574-595	4	osa-miR2118d/zma-miR2118d/sbi-miR2118-3p/ata-miR2118c-3p/ata-miR2118d-3p/	22	UAGGAAUAGGAUGCAUCAGGAA	:::: :: ::: ::::::::::	AUCCGUACCCUCCGUAGUCCUU
chr7B:65770728-65771369(+)	552-574	4	osa-miR2118d/zma-miR2118d/sbi-miR2118-3p/ata-miR2118c-3p/ata-miR2118d-3p/	22	UAGACAUGGGAGGCAUCGGAGAA	::: :::::::::::::.: :::	AUCCGUACCCUCCGUAGUC-CUU
chr7B:66502728-66503521(+)	698-719	4	osa-miR2118d/zma-miR2118d/sbi-miR2118-3p/ata-miR2118c-3p/ata-miR2118d-3p/	22	UAGGACUGGGAGGCAUUGGGAA	:::: ::::::::::..::::	AUCCGUACCCUCCGUAGUCCUU
chr7B:675961594-675962434(-)	731-752	3.5	osa-miR2118d/zma-miR2118d/sbi-miR2118-3p/ata-miR2118c-3p/ata-miR2118d-3p/	22	UAGGUUUGAGAGGCAUUAGGAA	::::. :: :::::::.:::::	AUCCGUACCCUCCGUAGUCCUU
chr7B:677639408-677640308(+)	812-833	4	osa-miR2118d/zma-miR2118d/sbi-miR2118-3p/ata-miR2118c-3p/ata-miR2118d-3p/	22	UGGAUUUGGGAGGCAUUAGGAA	:.: . ::::::::::.:::::	AUCCGUACCCUCCGUAGUCCUU
chr7B:677662465-677663281(+)	724-745	2	osa-miR2118d/zma-miR2118d/sbi-miR2118-3p/ata-miR2118c-3p/ata-miR2118d-3p/	22	UAGGCUUGGGAGGCAUUAGGAA	::::: ::::::::::.:::::	AUCCGUACCCUCCGUAGUCCUU
chr7B:677767285-677767967(+)	594-615	3.5	osa-miR2118d/zma-miR2118d/sbi-miR2118-3p/ata-miR2118c-3p/ata-miR2118d-3p/	22	UAGAUUUGGGAGGCAUUAGGAA	::: . ::::::::::.:::::	AUCCGUACCCUCCGUAGUCCUU
chr7B:68317837-68318478(+)	574-595	4	osa-miR2118d/zma-miR2118d/sbi-miR2118-3p/ata-miR2118c-3p/ata-miR2118d-3p/	22	UGGGAGUGGGAGGUAUUAGGAA	:.:: .:::::::.::.:::::	AUCCGUACCCUCCGUAGUCCUU
chr7D:106796871-106797386(-)	446-467	3	osa-miR2118d/zma-miR2118d/sbi-miR2118-3p/ata-miR2118c-3p/ata-miR2118d-3p/	22	UAGACCUGGGAGGCAUCAGGGA	::: : ::::::::::::::.:	AUCCGUACCCUCCGUAGUCCUU
chr7D:106918175-106918963(+)	678-700	2	osa-miR2118d/zma-miR2118d/sbi-miR2118-3p/ata-miR2118c-3p/ata-miR2118d-3p/	22	UAGGCAUGGGAGGCAUCAGAGAA	::::::::::::::::::: :::	AUCCGUACCCUCCGUAGUC-CUU
chr7D:106962927-106963547(+)	529-551	3.5	osa-miR2118d/zma-miR2118d/sbi-miR2118-3p/ata-miR2118c-3p/ata-miR2118d-3p/	22	UGGGCAUGGGAGGCAUCGGAGAA	:.:::::::::::::::.: :::	AUCCGUACCCUCCGUAGUC-CUU
chr7D:107069962-107070482(+)	431-453	4	osa-miR2118d/zma-miR2118d/sbi-miR2118-3p/ata-miR2118c-3p/ata-miR2118d-3p/	22	UAGGCAUUGGAGGCAUCGGAGAA	::::::: :::::::::.: :::	AUCCGUACCCUCCGUAGUC-CUU
chr7D:107327921-107328541(+)	550-572	3	osa-miR2118d/zma-miR2118d/sbi-miR2118-3p/ata-miR2118c-3p/ata-miR2118d-3p/	22	UAGGCAUGGGAGGCAUCGGAGAA	:::::::::::::::::.: :::	AUCCGUACCCUCCGUAGUC-CUU
chr7D:121787464-121787939(+)	427-448	4	osa-miR2118d/zma-miR2118d/sbi-miR2118-3p/ata-miR2118c-3p/ata-miR2118d-3p/	22	UAUGAAUGGGAAGCAUCAGGAA	:: : :::::: ::::::::::	AUCCGUACCCUCCGUAGUCCUU
chr7D:137785108-137785649(-)	472-493	3	osa-miR2118d/zma-miR2118d/sbi-miR2118-3p/ata-miR2118c-3p/ata-miR2118d-3p/	22	UAAGCUUGGGAGGCAUCGGGAA	:: :: :::::::::::.::::	AUCCGUACCCUCCGUAGUCCUU
chr7D:173919967-173920503(+)	467-488	4	osa-miR2118d/zma-miR2118d/sbi-miR2118-3p/ata-miR2118c-3p/ata-miR2118d-3p/	22	UAGGGCUGAGAGGCAUCGGGAA	:::: :: ::::::::.::::	AUCCGUACCCUCCGUAGUCCUU
chr7D:192675652-192676375(-)	614-635	4	osa-miR2118d/zma-miR2118d/sbi-miR2118-3p/ata-miR2118c-3p/ata-miR2118d-3p/	22	UAGGCUUGAGAGGCAUCGGGAU	::::: :: ::::::::.:::	AUCCGUACCCUCCGUAGUCCUU
chr7D:35547656-35548222(-)	457-478	3	osa-miR2118d/zma-miR2118d/sbi-miR2118-3p/ata-miR2118c-3p/ata-miR2118d-3p/	22	AGGGAAUGGGAGGCAUCAGGAG	.:: ::::::::::::::::.	AUCCGUACCCUCCGUAGUCCUU
chr7D:36822943-36823813(+)	761-782	4	osa-miR2118d/zma-miR2118d/sbi-miR2118-3p/ata-miR2118c-3p/ata-miR2118d-3p/	22	UAGGCUUGAGAGGCAUCCGGAA	::::: :: :::::::: ::::	AUCCGUACCCUCCGUAGUCCUU
chr7D:39018175-39018863(+)	598-619	3	osa-miR2118d/zma-miR2118d/sbi-miR2118-3p/ata-miR2118c-3p/ata-miR2118d-3p/	22	UAGGCAUGAGAGGCACCAGGAA	:::::::: :::::: ::::::	AUCCGUACCCUCCGUAGUCCUU
chr7D:44300522-44301015(+)	405-426	4	osa-miR2118d/zma-miR2118d/sbi-miR2118-3p/ata-miR2118c-3p/ata-miR2118d-3p/	22	UUGGAAUGGGAGGAAUCAGGAA	: :: :::::::: ::::::::	AUCCGUACCCUCCGUAGUCCUU
chr7D:52054877-52055517(+)	551-572	3	osa-miR2118d/zma-miR2118d/sbi-miR2118-3p/ata-miR2118c-3p/ata-miR2118d-3p/	22	UAGGCUUGAGAGGCAUCAGGGA	::::: :: :::::::::::.:	AUCCGUACCCUCCGUAGUCCUU
chr7D:53271509-53272003(-)	406-427	4	osa-miR2118d/zma-miR2118d/sbi-miR2118-3p/ata-miR2118c-3p/ata-miR2118d-3p/	22	UAGGUGUGAGAGGCAUUAGGGA	::::..:: :::::::.:::.:	AUCCGUACCCUCCGUAGUCCUU
chr7D:562642404-562642900(+)	406-427	4	osa-miR2118d/zma-miR2118d/sbi-miR2118-3p/ata-miR2118c-3p/ata-miR2118d-3p/	22	UCGGCAUGAGAGGUAUCAGGAC	: :::::: ::::.:::::::	AUCCGUACCCUCCGUAGUCCUU
chr7D:563306850-563307489(+)	530-551	3	osa-miR2118d/zma-miR2118d/sbi-miR2118-3p/ata-miR2118c-3p/ata-miR2118d-3p/	22	UUGGCAUGGGAGGUAUCAGGAC	: :::::::::::.:::::::	AUCCGUACCCUCCGUAGUCCUU
chr7D:596948698-596949383(-)	595-616	3.5	osa-miR2118d/zma-miR2118d/sbi-miR2118-3p/ata-miR2118c-3p/ata-miR2118d-3p/	22	UAGAUCUGGGAGGCAUUAGGAA	::: . ::::::::::.:::::	AUCCGUACCCUCCGUAGUCCUU
chr7D:596985062-596985829(-)	679-700	3.5	osa-miR2118d/zma-miR2118d/sbi-miR2118-3p/ata-miR2118c-3p/ata-miR2118d-3p/	22	UAGGUUUGAGAGGCAUUAGGAA	::::. :: :::::::.:::::	AUCCGUACCCUCCGUAGUCCUU
chr7D:597122522-597123102(-)	490-511	2.5	osa-miR2118d/zma-miR2118d/sbi-miR2118-3p/ata-miR2118c-3p/ata-miR2118d-3p/	22	UAGAUAUGGGAGGCAUUAGGAA	::: .:::::::::::.:::::	AUCCGUACCCUCCGUAGUCCUU
chr7D:597160279-597160813(-)	425-446	3.5	osa-miR2118d/zma-miR2118d/sbi-miR2118-3p/ata-miR2118c-3p/ata-miR2118d-3p/	22	UAGAUUUGGGAGGCAUUAGGAA	::: . ::::::::::.:::::	AUCCGUACCCUCCGUAGUCCUU
chr7D:597178437-597178975(-)	469-490	2.5	osa-miR2118d/zma-miR2118d/sbi-miR2118-3p/ata-miR2118c-3p/ata-miR2118d-3p/	22	UAGAUAUGGGAGGCAUUAGGAA	::: .:::::::::::.:::::	AUCCGUACCCUCCGUAGUCCUU
chr7D:598147516-598148201(-)	616-637	3.5	osa-miR2118d/zma-miR2118d/sbi-miR2118-3p/ata-miR2118c-3p/ata-miR2118d-3p/	22	UAGAUUUGGGAGGCAUUAGGAA	::: . ::::::::::.:::::	AUCCGUACCCUCCGUAGUCCUU
chr7D:598181457-598182181(-)	656-677	3.5	osa-miR2118d/zma-miR2118d/sbi-miR2118-3p/ata-miR2118c-3p/ata-miR2118d-3p/	22	UAGGUUUGAGAGGCAUUAGGAA	::::. :: :::::::.:::::	AUCCGUACCCUCCGUAGUCCUU
chr7D:598261035-598261783(-)	679-700	3.5	osa-miR2118d/zma-miR2118d/sbi-miR2118-3p/ata-miR2118c-3p/ata-miR2118d-3p/	22	UAGAUUUGGGAGGCAUUAGGAA	::: . ::::::::::.:::::	AUCCGUACCCUCCGUAGUCCUU
chr7D:598497314-598497944(+)	509-530	3.5	osa-miR2118d/zma-miR2118d/sbi-miR2118-3p/ata-miR2118c-3p/ata-miR2118d-3p/	22	UAGAUUUGGGAGGCAUUAGGAA	::: . ::::::::::.:::::	AUCCGUACCCUCCGUAGUCCUU
chr7D:598523375-598524209(+)	742-763	3.5	osa-miR2118d/zma-miR2118d/sbi-miR2118-3p/ata-miR2118c-3p/ata-miR2118d-3p/	22	UAGAUUUGGGAGGCAUUAGGAA	::: . ::::::::::.:::::	AUCCGUACCCUCCGUAGUCCUU
chrUn:70302439-70302963(+)	436-457	4	osa-miR2118d/zma-miR2118d/sbi-miR2118-3p/ata-miR2118c-3p/ata-miR2118d-3p/	22	UAUGCAUAGGAGGCACCAGGAA	:: :::: ::::::: ::::::	AUCCGUACCCUCCGUAGUCCUU
chrUn:92630812-92631455(-)	553-574	4	osa-miR2118d/zma-miR2118d/sbi-miR2118-3p/ata-miR2118c-3p/ata-miR2118d-3p/	22	UAGGAAUAGGAUGCAUCAGGAA	:::: :: ::: ::::::::::	AUCCGUACCCUCCGUAGUCCUU
chr1A:438341063-438341850(-)	699-720	4	osa-miR2118e/osa-miR2118r/	22	UAGGCUUUGGAGGCAUUUGGAA	::::: : ::::::::: ::::	AUCCGUACCCUCCGUAACCCUU
chr1A:494189370-494189951(-)	462-483	4	zma-miR2118e/	22	UUGGAAUGGGAGGCAUCAGAAA	: ::::::::::.:::::: ::	AUCCUUACCCUCUGUAGUCCUU
chr1A:504410695-504411416(+)	631-652	2.5	osa-miR2118e/osa-miR2118r/	22	UGGGCAUGGGAUGCAUUGGGAA	:.::::::::: ::::::::::	AUCCGUACCCUCCGUAACCCUU
chr1A:520433240-520434332(-)	1002-1023	4	zma-miR2118e/	22	UAGGCAUAUGAGGCAUCAGGAA	:::: :: :::.:::::::::	AUCCUUACCCUCUGUAGUCCUU
chr1A:534413893-534415075(+)	1092-1113	4	zma-miR2118e/	22	UUGGAAUGAGAGACAUUGGGAA	: :::::: :::::::..::::	AUCCUUACCCUCUGUAGUCCUU
chr1A:534432641-534433347(+)	616-637	4	zma-miR2118e/	22	UUGGAAUGAGAGACAUUGGGAA	: :::::: :::::::..::::	AUCCUUACCCUCUGUAGUCCUU
chr1B:21331620-21332280(+)	572-593	4	osa-miR2118e/osa-miR2118r/	22	UAGGCUUGGGAGGCAUUAGGAC	::::: ::::::::::: :::	AUCCGUACCCUCCGUAACCCUU
chr1B:31311553-31312362(+)	700-721	3	zma-miR2118e/	22	UAGGAAUGGGAAACAUUAGGAA	::::::::::: ::::.:::::	AUCCUUACCCUCUGUAGUCCUU
chr1B:31912023-31912622(+)	490-511	3	osa-miR2118e/osa-miR2118r/	22	UAGACAUGGGAGGCAUAGGGAA	::: :::::::::::: :::::	AUCCGUACCCUCCGUAACCCUU
chr1B:31971061-31971557(+)	406-427	4	osa-miR2118e/osa-miR2118r/	22	UAGACAUGGGAGGUAUAGGGAA	::: :::::::::.:: :::::	AUCCGUACCCUCCGUAACCCUU
chr1B:32067452-32068177(+)	635-656	3	osa-miR2118e/osa-miR2118r/	22	UAGACAUGGGAGGCAUAGGGAA	::: :::::::::::: :::::	AUCCGUACCCUCCGUAACCCUU
chr1B:374320212-374320664(-)	364-385	3	osa-miR2118e/osa-miR2118r/	22	UAGGGAUGGGCGGCAUUGGGAA	:::: ::::: :::::::::::	AUCCGUACCCUCCGUAACCCUU
chr1B:398065858-398066625(-)	658-679	4	zma-miR2118e/	22	UAGGCUUGUGAGACAUCGGGAA	:::: :: ::::::::.::::	AUCCUUACCCUCUGUAGUCCUU
chr1B:453498508-453499085(-)	489-510	4	osa-miR2118e/osa-miR2118r/	22	UAGGCUUUGGAGGCAUUUGGAA	::::: : ::::::::: ::::	AUCCGUACCCUCCGUAACCCUU
chr1B:562357390-562358208(+)	728-749	3.5	osa-miR2118e/osa-miR2118r/	22	UGGGAAUGGGAUGCAUUGGGAA	:.:: :::::: ::::::::::	AUCCGUACCCUCCGUAACCCUU
chr1B:592051642-592052437(-)	707-728	4	osa-miR2118e/osa-miR2118r/	22	UAGGAAUGAGCGGCAUUGGGAA	:::: ::: : :::::::::::	AUCCGUACCCUCCGUAACCCUU
chr1B:592210676-592211359(-)	593-614	3	osa-miR2118e/osa-miR2118r/	22	UCGGGAUGAGAGGCAUUGGGAA	: :: ::: :::::::::::::	AUCCGUACCCUCCGUAACCCUU
chr1B:599314650-599315379(-)	639-660	4	zma-miR2118e/	22	UAUGAAUGGGAGAUAUCAGAAA	:: ::::::::::.::::: ::	AUCCUUACCCUCUGUAGUCCUU
chr1B:612988592-612989109(-)	448-469	4	zma-miR2118e/	22	UAGGAUUUAGAGGCAUCAGGAA	::::: : :::.:::::::::	AUCCUUACCCUCUGUAGUCCUU
chr1B:640481384-640481866(-)	392-413	4	zma-miR2118e/	22	UAGGCAUAGGGGGCAUCAGGAA	:::: :: ::.:.:::::::::	AUCCUUACCCUCUGUAGUCCUU
chr1B:666289892-666290554(-)	637-658	2.5	osa-miR2118e/osa-miR2118r/	22	UAGGUAUGGGAGGCAUAGGGAA	::::.::::::::::: :::::	AUCCGUACCCUCCGUAACCCUU
chr1B:666306356-666307016(-)	551-572	4	osa-miR2118e/osa-miR2118r/	22	UAGGCAUGGGAAGCAUAGGGAA	::::::::::: :::: :::::	AUCCGUACCCUCCGUAACCCUU
chr1D:15605638-15606323(-)	532-553	4	osa-miR2118e/osa-miR2118r/	22	UAGGCUUGGGAGGCAUUCGGAU	::::: ::::::::::: :::	AUCCGUACCCUCCGUAACCCUU
chr1D:296515191-296515874(-)	574-595	4	zma-miR2118e/	22	UAGGCUUGUGAGACAUCGGGAA	:::: :: ::::::::.::::	AUCCUUACCCUCUGUAGUCCUU
chr1D:296631130-296631729(-)	509-530	4	zma-miR2118e/	22	UAGGCCUGUGAGACAUCGGGAA	:::: :: ::::::::.::::	AUCCUUACCCUCUGUAGUCCUU
chr1D:415460637-415461218(+)	491-512	4	zma-miR2118e/	22	UCGAAAUAGGAGGCAUCAGGAA	: : ::: ::::.:::::::::	AUCCUUACCCUCUGUAGUCCUU
chr1D:418644279-418645104(-)	756-777	4	osa-miR2118e/osa-miR2118r/	22	UGAGAGUGAGAGGCAUUGGGAA	:. : .:: :::::::::::::	AUCCGUACCCUCCGUAACCCUU
chr1D:424596718-424597425(-)	617-638	4	zma-miR2118e/	22	UAGGCAUAUGAGGCAUCAGGAA	:::: :: :::.:::::::::	AUCCUUACCCUCUGUAGUCCUU
chr1D:436979148-436979852(-)	637-658	3	osa-miR2118e/osa-miR2118r/	22	UAGGAAUGGGCGGCAUUGGGAA	:::: ::::: :::::::::::	AUCCGUACCCUCCGUAACCCUU
chr1D:437547057-437547676(+)	531-552	3	osa-miR2118e/osa-miR2118r/	22	UUGGAAUGAGAGGCAUUGGGAA	: :: ::: :::::::::::::	AUCCGUACCCUCCGUAACCCUU
chr1D:438028805-438029449(+)	554-575	3	osa-miR2118e/osa-miR2118r/	22	UAGGAACGAGAGGCAUUGGGAA	:::: : : :::::::::::::	AUCCGUACCCUCCGUAACCCUU
chr1D:447460418-447461082(-)	574-595	4	zma-miR2118e/	22	UAGGAUUUAGAGGCAUCAGGAA	::::: : :::.:::::::::	AUCCUUACCCUCUGUAGUCCUU
chr1D:447521191-447521750(-)	490-511	4	zma-miR2118e/	22	UAGGAUUUAGAGGCAUCAGGAA	::::: : :::.:::::::::	AUCCUUACCCUCUGUAGUCCUU
chr1D:490522303-490522863(-)	427-447	4	zma-miR2118e/	22	UAGGA-UGGGUGGCAUCAGGAA	::::: :::: :.:::::::::	AUCCUUACCCUCUGUAGUCCUU
chr2A:19290799-19291698(+)	811-832	4	osa-miR2118e/osa-miR2118r/	22	CAGGCCUGCGAGGCAUUGGGAU	:::: :: ::::::::::::	AUCCGUACCCUCCGUAACCCUU
chr2A:19308782-19309920(+)	634-655	2	osa-miR2118e/osa-miR2118r/	22	UAGGCAUGUGAGGCAUUGGGAU	:::::::: ::::::::::::	AUCCGUACCCUCCGUAACCCUU
chr2A:20804647-20805120(-)	385-406	3.5	osa-miR2118e/osa-miR2118r/	22	UGAGCAUGUGAGGUAUUGGGAA	:. ::::: ::::.::::::::	AUCCGUACCCUCCGUAACCCUU
chr2A:712800315-712801080(+)	656-677	3.5	zma-miR2118e/	22	UAAGAGUAGGAGACAUCGGGAA	:: ::.: :::::::::.::::	AUCCUUACCCUCUGUAGUCCUU
chr2B:30023887-30024410(+)	433-454	2.5	osa-miR2118e/osa-miR2118r/	22	CGGGCAUGGGAGGCAUUGGGAU	.:::::::::::::::::::	AUCCGUACCCUCCGUAACCCUU
chr2B:690674866-690675593(+)	658-679	4	zma-miR2118e/	22	UAAGAAUAGGAGACAUUGGGAA	:: :::: ::::::::..::::	AUCCUUACCCUCUGUAGUCCUU
chr2B:736965953-736966573(+)	511-532	4	zma-miR2118e/	22	UAGGACUGGGAGACAUCGGUAA	::::: :::::::::::.: ::	AUCCUUACCCUCUGUAGUCCUU
chr2D:598886546-598886998(-)	362-383	3	zma-miR2118e/	22	UAGGAAUGGGAGGUGUCAGGAA	::::::::::::...:::::::	AUCCUUACCCUCUGUAGUCCUU
chr2D:598893208-598893648(-)	350-371	4	zma-miR2118e/	22	UAGGAAUGGGAGGUGUCAGGAU	::::::::::::...::::::	AUCCUUACCCUCUGUAGUCCUU
chr2D:606085383-606085961(+)	488-509	3	zma-miR2118e/	22	UAGGACUGGGAGACAUCAGUAA	::::: ::::::::::::: ::	AUCCUUACCCUCUGUAGUCCUU
chr2D:91233074-91233757(+)	574-595	4	zma-miR2118e/	22	UAGAAAUGGGAGAUAUUGGGAA	::: :::::::::.::..::::	AUCCUUACCCUCUGUAGUCCUU
chr3A:23194240-23195007(+)	677-698	3.5	zma-miR2118e/	22	GAGGAAUGAGAGGCAUCAGGAG	::::::: :::.::::::::.	AUCCUUACCCUCUGUAGUCCUU
chr3A:28441608-28442289(-)	593-614	3.5	zma-miR2118e/	22	UAGGAGUUGGAGUCAUCAGGAA	:::::.: :::: :::::::::	AUCCUUACCCUCUGUAGUCCUU
chr3A:30144670-30145100(+)	362-383	4	zma-miR2118e/	22	UGGGGAUGGGAGGCUUCAGGAA	:.::.:::::::.: :::::::	AUCCUUACCCUCUGUAGUCCUU
chr3A:32878100-32878992(+)	845-866	2	zma-miR2118e/	22	UAGGAAGAGGAGACAUCAGGAA	:::::: ::::::::::::::	AUCCUUACCCUCUGUAGUCCUU
chr3A:478201-478842(-)	532-553	4	zma-miR2118e/	22	UCGGCUUGGGAGGCAUCAGGAA	: :: ::::::.:::::::::	AUCCUUACCCUCUGUAGUCCUU
chr3A:646288418-646288952(+)	446-467	3	osa-miR2118e/osa-miR2118r/	22	UAGGAAUAGGAGGCAUUGGGGA	:::: :: ::::::::::::.:	AUCCGUACCCUCCGUAACCCUU
chr3A:709700940-709701644(-)	595-616	3	zma-miR2118e/	22	UAGGAAUAUGAGACAUCAGGAC	::::::: ::::::::::::	AUCCUUACCCUCUGUAGUCCUU
chr3A:710261365-710262163(-)	708-729	1.5	zma-miR2118e/	22	UAGGAAUGUGAGACAUCAGGAG	:::::::: ::::::::::::.	AUCCUUACCCUCUGUAGUCCUU
chr3A:80695584-80696478(+)	785-806	3	osa-miR2118e/osa-miR2118r/	22	UAGGCCUAGGAGGUAUUGGGAA	::::: : :::::.::::::::	AUCCGUACCCUCCGUAACCCUU
chr3B:115506287-115506993(+)	639-660	3	osa-miR2118e/osa-miR2118r/	22	UAGGCCUAGGAGGUAUUGGGAA	::::: : :::::.::::::::	AUCCGUACCCUCCGUAACCCUU
chr3B:20071799-20072379(-)	472-493	3.5	zma-miR2118e/	22	GAGGAAUGAGAGGCAUCAGGAG	::::::: :::.::::::::.	AUCCUUACCCUCUGUAGUCCUU
chr3B:36525571-36526086(-)	467-488	4	zma-miR2118e/	22	UGAGAAUAGGAGACAUCGGGAG	:. :::: :::::::::.:::.	AUCCUUACCCUCUGUAGUCCUU
chr3B:42346092-42346839(+)	657-678	4	osa-miR2118e/osa-miR2118r/	22	UAGGCUCGGGAGGCAUCGGGAA	::::: ::::::::: :::::	AUCCGUACCCUCCGUAACCCUU
chr3B:683783443-683784189(-)	656-677	4	zma-miR2118e/	22	UAGGACUGCGAGGCGUCAGGAA	::::: :: :::.:.:::::::	AUCCUUACCCUCUGUAGUCCUU
chr3B:763936579-763937474(+)	805-826	3	zma-miR2118e/	22	UGGGAAUAUGAGACAUCAGGAG	:.::::: ::::::::::::.	AUCCUUACCCUCUGUAGUCCUU
chr3B:764127321-764127836(+)	406-427	3.5	zma-miR2118e/	22	UAGGAAUAUGAGACAUCGGGAG	::::::: ::::::::.:::.	AUCCUUACCCUCUGUAGUCCUU
chr3B:764185717-764186234(+)	448-469	2	zma-miR2118e/	22	UGGGAAUAGGAGACAUCAGGAG	:.::::: :::::::::::::.	AUCCUUACCCUCUGUAGUCCUU
chr3B:764234889-764235572(+)	595-616	2.5	zma-miR2118e/	22	UAGGAAUAUGAGACAUCAGGAG	::::::: ::::::::::::.	AUCCUUACCCUCUGUAGUCCUU
chr3B:764272719-764273383(+)	574-595	3	zma-miR2118e/	22	UGGGAAUAUGAGACAUCAGGAG	:.::::: ::::::::::::.	AUCCUUACCCUCUGUAGUCCUU
chr3B:764346650-764347354(+)	616-637	3.5	zma-miR2118e/	22	UGGGAAUGAGAGACAUCAGAAA	:.:::::: :::::::::: ::	AUCCUUACCCUCUGUAGUCCUU
chr3B:764363420-764364262(+)	752-773	3.5	zma-miR2118e/	22	UAGGAGUAGGAGACAUCAGAAA	:::::.: ::::::::::: ::	AUCCUUACCCUCUGUAGUCCUU
chr3B:764426243-764426756(+)	425-446	2	zma-miR2118e/	22	UGGGAAUAGGAGACAUCAGGAG	:.::::: :::::::::::::.	AUCCUUACCCUCUGUAGUCCUU
chr3B:773140273-773140769(-)	427-448	4	osa-miR2118e/osa-miR2118r/	22	UAGGCUUGGAAGGCAUUGGGAU	::::: ::: :::::::::::	AUCCGUACCCUCCGUAACCCUU
chr3B:775709168-775709792(-)	534-555	4	osa-miR2118e/osa-miR2118r/	22	UAGGAUUGGGUGGCAUUGGGAA	:::: :::: :::::::::::	AUCCGUACCCUCCGUAACCCUU
chr3D:13813227-13813910(-)	595-616	4	zma-miR2118e/	22	GAGGGAUGAGAGGCAUCAGGAG	:::.::: :::.::::::::.	AUCCUUACCCUCUGUAGUCCUU
chr3D:20035192-20035811(-)	519-540	4	zma-miR2118e/	22	UAGGAAUUGGAGGCAUCAGAAA	::::::: ::::.:::::: ::	AUCCUUACCCUCUGUAGUCCUU
chr3D:20320504-20321145(-)	572-593	4	zma-miR2118e/	22	UAGGAAUUGGAGGCAUCAGAAA	::::::: ::::.:::::: ::	AUCCUUACCCUCUGUAGUCCUU
chr3D:20815494-20816114(-)	532-553	3.5	zma-miR2118e/	22	UAGGAGUUGGAGUCAUCAGGAA	:::::.: :::: :::::::::	AUCCUUACCCUCUGUAGUCCUU
chr3D:23732801-23733591(+)	700-721	2	zma-miR2118e/	22	UAGGAAAAGGAGACAUCAGGAA	:::::: ::::::::::::::	AUCCUUACCCUCUGUAGUCCUU
chr3D:24126845-24127516(+)	583-604	4	zma-miR2118e/	22	UAGGAAAAGGAGGCAUCGGGAA	:::::: ::::.::::.::::	AUCCUUACCCUCUGUAGUCCUU
chr3D:24614504-24615103(+)	509-530	3.5	zma-miR2118e/	22	UGGAAUUGGGAGGCAUCAGGAA	:.: : ::::::.:::::::::	AUCCUUACCCUCUGUAGUCCUU
chr3D:3530826-3531275(-)	341-362	3	zma-miR2118e/	22	UAGGAUUGGGAGACAUCAAGAA	::::: :::::::::::: :::	AUCCUUACCCUCUGUAGUCCUU
chr3D:572486330-572486971(-)	550-572	4	osa-miR2118e/osa-miR2118r/	22	UACGAAUGGGAGGCAUAUGGGAA	:: : ::::::::::: ::::::	AUCCGUACCCUCCGUA-ACCCUU
chr3D:574441510-574442083(-)	506-527	2.5	zma-miR2118e/	22	UAGGAAUAUGAGACAUCAGGAG	::::::: ::::::::::::.	AUCCUUACCCUCUGUAGUCCUU
chr3D:574503475-574504118(-)	553-574	3.5	zma-miR2118e/	22	UGGGAAUAGGAGACAUCAGAAA	:.::::: ::::::::::: ::	AUCCUUACCCUCUGUAGUCCUU
chr3D:574522041-574522724(-)	595-616	4	zma-miR2118e/	22	UGGGAAUAGGAGCCAUCAGGAG	:.::::: :::: ::::::::.	AUCCUUACCCUCUGUAGUCCUU
chr3D:574531505-574532146(-)	551-572	3	zma-miR2118e/	22	UGGGAAUACGAGACAUCAGGAG	:.::::: ::::::::::::.	AUCCUUACCCUCUGUAGUCCUU
chr3D:574712503-574713164(-)	573-594	3.5	zma-miR2118e/	22	UAGGAAUAUGAGACAUCGGGAG	::::::: ::::::::.:::.	AUCCUUACCCUCUGUAGUCCUU
chr3D:575329247-575329898(-)	563-584	3	zma-miR2118e/	22	UGGGAAUAUGAGACAUCAGGAG	:.::::: ::::::::::::.	AUCCUUACCCUCUGUAGUCCUU
chr3D:575347921-575348769(-)	739-760	3	zma-miR2118e/	22	UGGGAAUAUGAGACAUCAGGAG	:.::::: ::::::::::::.	AUCCUUACCCUCUGUAGUCCUU
chr4A:632785446-632786240(+)	677-698	3	zma-miR2118e/	22	UAGCAAUGGGAGGCAUCGGGAA	::: ::::::::.::::.::::	AUCCUUACCCUCUGUAGUCCUU
chr4A:632785446-632786240(+)	677-698	4	osa-miR2118e/osa-miR2118r/	22	UAGCAAUGGGAGGCAUCGGGAA	::: ::::::::::: :::::	AUCCGUACCCUCCGUAACCCUU
chr4A:642112958-642114054(-)	987-1008	4	zma-miR2118e/	22	UAGGAAUAAGAGACAUCGGGAU	::::::: ::::::::.:::	AUCCUUACCCUCUGUAGUCCUU
chr4A:642115747-642116304(-)	467-488	2.5	zma-miR2118e/	22	UAGGAAUCAGAGACAUCAGGAG	::::::: ::::::::::::.	AUCCUUACCCUCUGUAGUCCUU
chr4A:642407149-642408126(-)	868-889	2.5	zma-miR2118e/	22	UAGGAAUUAGAGACAUCAGGAG	::::::: ::::::::::::.	AUCCUUACCCUCUGUAGUCCUU
chr4A:642598636-642599444(+)	699-720	1.5	zma-miR2118e/	22	UAGGAAUCGGAGACAUCAGGAG	::::::: :::::::::::::.	AUCCUUACCCUCUGUAGUCCUU
chr4A:642674844-642675695(-)	761-782	3.5	zma-miR2118e/	22	UGGGAAUGGAAGACAUUAGGAA	:.::::::: ::::::.:::::	AUCCUUACCCUCUGUAGUCCUU
chr4A:642689742-642690320(-)	469-490	2.5	zma-miR2118e/	22	UAGGAAUUAGAGACAUCAGGAG	::::::: ::::::::::::.	AUCCUUACCCUCUGUAGUCCUU
chr4A:642852622-642853223(-)	511-532	3.5	zma-miR2118e/	22	UGGGAAUGGAAGACAUUAGGAA	:.::::::: ::::::.:::::	AUCCUUACCCUCUGUAGUCCUU
chr4A:642881196-642882203(-)	938-959	4	zma-miR2118e/	22	UAGGAAUAAGAGACAUCGGGAU	::::::: ::::::::.:::	AUCCUUACCCUCUGUAGUCCUU
chr4A:643146501-643147164(+)	531-552	3.5	zma-miR2118e/	22	UAGGAUUUAGAGACAUCAGGAG	::::: : ::::::::::::.	AUCCUUACCCUCUGUAGUCCUU
chr4A:643153440-643153932(-)	404-425	3	osa-miR2118e/osa-miR2118r/	22	UAGGCAUGGAAGGCGUUGGGAA	::::::::: ::::.:::::::	AUCCGUACCCUCCGUAACCCUU
chr4A:648590107-648590663(-)	489-510	4	zma-miR2118e/	22	UAGGAAUAGGAGGCAGCAGGAA	::::::: ::::.:: ::::::	AUCCUUACCCUCUGUAGUCCUU
chr4A:667092208-667092908(+)	610-631	4	osa-miR2118e/osa-miR2118r/	22	UAGGCUUGAGAGGUAUUGGGGA	::::: :: ::::.::::::.:	AUCCGUACCCUCCGUAACCCUU
chr4A:672174575-672175291(-)	607-628	3.5	zma-miR2118e/	22	UGAGAACGGGAGACAUCGGGAA	:. ::: ::::::::::.::::	AUCCUUACCCUCUGUAGUCCUU
chr4A:672265817-672266446(-)	520-541	3.5	zma-miR2118e/	22	UGAGAACGGGAGACAUCGGGAA	:. ::: ::::::::::.::::	AUCCUUACCCUCUGUAGUCCUU
chr4A:672287724-672288115(-)	301-322	3.5	zma-miR2118e/	22	UGGGAAUAGGAGACGUCGGGAA	:.::::: ::::::.::.::::	AUCCUUACCCUCUGUAGUCCUU
chr4A:686927123-686927535(-)	322-343	3	osa-miR2118e/osa-miR2118r/	22	UAGGAUUAGGAGGCAUUGGGAA	:::: : ::::::::::::::	AUCCGUACCCUCCGUAACCCUU
chr4A:687051910-687052612(-)	614-635	2.5	osa-miR2118e/osa-miR2118r/	22	UGGGCAUUGGAGGUAUUGGGAA	:.::::: :::::.::::::::	AUCCGUACCCUCCGUAACCCUU
chr4A:688473523-688473977(-)	385-406	4	osa-miR2118e/osa-miR2118r/	22	UGAGAAUUGGAGGCAUUGGGAG	:. : :: :::::::::::::.	AUCCGUACCCUCCGUAACCCUU
chr4A:688964727-688965366(-)	551-572	4	zma-miR2118e/	22	UGGGAACCGGAGGCAUCAGGAG	:.:::: ::::.::::::::.	AUCCUUACCCUCUGUAGUCCUU
chr4A:694944767-694945452(-)	595-616	4	zma-miR2118e/	22	UAGGAAUUAGAGGCAUCAGGAC	::::::: :::.::::::::	AUCCUUACCCUCUGUAGUCCUU
chr4A:698090756-698091376(-)	511-532	4	zma-miR2118e/	22	UAUGACUGGGAGGCAUCGGGAA	:: :: ::::::.::::.::::	AUCCUUACCCUCUGUAGUCCUU
chr4A:713943699-713944340(+)	532-553	4	zma-miR2118e/	22	CAGGAAUGGGAGACUUCGGGAA	::::::::::::: ::.::::	AUCCUUACCCUCUGUAGUCCUU
chr4A:720959510-720960107(+)	530-551	3.5	osa-miR2118e/osa-miR2118r/	22	UGGGAAUAAGAGGCAUUGGGAA	:.:: :: :::::::::::::	AUCCGUACCCUCCGUAACCCUU
chr4A:722650622-722651221(-)	530-551	4	zma-miR2118e/	22	UGAGAUUAGGAGACAUCAGGAG	:. :: : :::::::::::::.	AUCCUUACCCUCUGUAGUCCUU
chr4A:723798928-723799560(-)	542-563	3.5	zma-miR2118e/	22	UGAGAAUAGGAGGCAUCAGGAA	:. :::: ::::.:::::::::	AUCCUUACCCUCUGUAGUCCUU
chr4B:10479944-10480703(+)	650-671	4	osa-miR2118e/osa-miR2118r/	22	UAGAAAUGGGAGGCCUUGGGAA	::: ::::::::: :::::::	AUCCGUACCCUCCGUAACCCUU
chr4B:22906597-22907323(-)	638-659	3	osa-miR2118e/osa-miR2118r/	22	UAAGCAUGGGAGGCAUAGGGAA	:: ::::::::::::: :::::	AUCCGUACCCUCCGUAACCCUU
chr4B:35210441-35211187(-)	656-677	3.5	osa-miR2118e/osa-miR2118r/	22	UGGGCAUGAGAGGCAUUAGGAA	:.:::::: :::::::: ::::	AUCCGUACCCUCCGUAACCCUU
chr4B:3583746-3584618(+)	165-186	3	osa-miR2118e/osa-miR2118r/	22	UACGAAUGUGAGGCAUUGGGAA	:: : ::: :::::::::::::	AUCCGUACCCUCCGUAACCCUU
chr4D:12550357-12551170(-)	722-743	3.5	osa-miR2118e/osa-miR2118r/	22	UAAGCAUGGGAGGCAUCGGGAG	:: ::::::::::::: ::::.	AUCCGUACCCUCCGUAACCCUU
chr5A:11748195-11748688(-)	424-445	4	osa-miR2118e/osa-miR2118r/	22	UAGGAAUGAGAGGGAUUGGGAA	:::: ::: :::: ::::::::	AUCCGUACCCUCCGUAACCCUU
chr5A:12206411-12207110(-)	551-572	3.5	zma-miR2118e/	22	UGGGCAUGAGAGACAUUAGGAA	:.:: ::: :::::::.:::::	AUCCUUACCCUCUGUAGUCCUU
chr5A:398983704-398984199(-)	404-425	4	osa-miR2118e/osa-miR2118r/	22	UAGGAUUGGGAGGCAUGGGGAA	:::: :::::::::: :::::	AUCCGUACCCUCCGUAACCCUU
chr5A:559089641-559090199(-)	470-491	4	zma-miR2118e/	22	UAGGACUGGGAGGCACCAGGAA	::::: ::::::.:: ::::::	AUCCUUACCCUCUGUAGUCCUU
chr5A:566615549-566616234(+)	595-616	4	osa-miR2118e/osa-miR2118r/	22	UAGGAUUGUGAGGUAUUGGGAA	:::: :: ::::.::::::::	AUCCGUACCCUCCGUAACCCUU
chr5A:606251053-606251693(-)	550-571	3.5	zma-miR2118e/	22	CGGGAACGAGAGACAUCAGGAA	.:::: : :::::::::::::	AUCCUUACCCUCUGUAGUCCUU
chr5A:631705505-631706249(+)	677-698	2.5	osa-miR2118e/osa-miR2118r/	22	UGGGCAUGGGAGGCAUGGGGAA	:.:::::::::::::: :::::	AUCCGUACCCUCCGUAACCCUU
chr5A:631722187-631722975(+)	679-700	4	osa-miR2118e/osa-miR2118r/	22	UGAGCGUGGGAGGCAUGGGGAA	:. ::.:::::::::: :::::	AUCCGUACCCUCCGUAACCCUU
chr5A:631739829-631740615(+)	698-719	4	osa-miR2118e/osa-miR2118r/	22	UGGACGUGGGAGGCAUGGGGAA	:.: :.:::::::::: :::::	AUCCGUACCCUCCGUAACCCUU
chr5B:14649150-14649593(-)	334-355	4	zma-miR2118e/	22	UAGGCACGGAAGACAUCAGGAA	:::: : :: ::::::::::::	AUCCUUACCCUCUGUAGUCCUU
chr5B:304275928-304276716(+)	679-700	3.5	osa-miR2118e/osa-miR2118r/	22	UGGGAAUAUGAGGCAUUGGGAA	:.:: :: :::::::::::::	AUCCGUACCCUCCGUAACCCUU
chr5B:523365202-523365751(-)	440-461	4	osa-miR2118e/osa-miR2118r/	22	UAGGAUUGGGAGGCAAUGGGAA	:::: ::::::::: ::::::	AUCCGUACCCUCCGUAACCCUU
chr5B:539303121-539303675(-)	464-485	2.5	zma-miR2118e/	22	UAGGGCUGGGAGGCAUCAGGAA	::::. ::::::.:::::::::	AUCCUUACCCUCUGUAGUCCUU
chr5B:539307256-539307941(-)	595-616	3.5	zma-miR2118e/	22	UAGGGUUGGGAGACCUCAGGAA	::::. :::::::: :::::::	AUCCUUACCCUCUGUAGUCCUU
chr5B:547141458-547142097(+)	593-614	3	osa-miR2118e/osa-miR2118r/	22	UCGGAAUAGGAGGCAUUGGGAA	: :: :: ::::::::::::::	AUCCGUACCCUCCGUAACCCUU
chr5B:547279050-547279778(+)	638-659	3.5	osa-miR2118e/osa-miR2118r/	22	UGGGAUUGUGAGGCAUUGGGAA	:.:: :: :::::::::::::	AUCCGUACCCUCCGUAACCCUU
chr5B:547529308-547529951(+)	553-574	4	osa-miR2118e/osa-miR2118r/	22	UAGGAUUGUGAGGUAUUGGGAA	:::: :: ::::.::::::::	AUCCGUACCCUCCGUAACCCUU
chr5B:547551694-547552235(+)	451-472	3	osa-miR2118e/osa-miR2118r/	22	UAGGAAUGUGAGGUAUUGGGAA	:::: ::: ::::.::::::::	AUCCGUACCCUCCGUAACCCUU
chr5B:547554219-547555113(+)	805-826	4	zma-miR2118e/	22	UAGGAUUGUGAGAUAUUAGGAA	::::: :: ::::.::.:::::	AUCCUUACCCUCUGUAGUCCUU
chr5B:547561324-547562238(+)	806-827	4	zma-miR2118e/	22	UAGGAUUGUGAGAUAUUAGGAA	::::: :: ::::.::.:::::	AUCCUUACCCUCUGUAGUCCUU
chr5B:596448051-596448514(+)	373-394	2.5	zma-miR2118e/	22	UGGGAAUGGAAGACAUCAGGAA	:.::::::: ::::::::::::	AUCCUUACCCUCUGUAGUCCUU
chr5B:596491983-596492664(+)	572-593	3.5	zma-miR2118e/	22	CGGGAACGAGAGACAUCAGGAA	.:::: : :::::::::::::	AUCCUUACCCUCUGUAGUCCUU
chr5B:596502052-596502987(+)	826-847	2.5	zma-miR2118e/	22	UGGGAAUAAGAGACAUCAGGAA	:.::::: :::::::::::::	AUCCUUACCCUCUGUAGUCCUU
chr5B:596691169-596691792(+)	514-535	3.5	zma-miR2118e/	22	CGGGAACGAGAGACAUCAGGAA	.:::: : :::::::::::::	AUCCUUACCCUCUGUAGUCCUU
chr5B:633965475-633966200(+)	637-658	4	osa-miR2118e/osa-miR2118r/	22	UGGGGGUGGGAGGCAUAGGGAA	:.:: .:::::::::: :::::	AUCCGUACCCUCCGUAACCCUU
chr5B:634447608-634448335(-)	637-658	4	osa-miR2118e/osa-miR2118r/	22	UAGGCCUGGAAGGUAUUGGGAA	::::: ::: :::.::::::::	AUCCGUACCCUCCGUAACCCUU
chr5B:672165192-672165792(-)	510-531	3.5	zma-miR2118e/	22	UAGGUGUGCGAGGCAUCAGGAA	:::: .:: :::.:::::::::	AUCCUUACCCUCUGUAGUCCUU
chr5B:672172667-672173248(-)	472-493	3.5	zma-miR2118e/	22	UAGGUCUGAGAGACAUCAGGAG	:::: :: ::::::::::::.	AUCCUUACCCUCUGUAGUCCUU
chr5D:268534055-268534658(+)	513-534	2.5	osa-miR2118e/osa-miR2118r/	22	UGGGAAUAGGAGGCAUUGGGAA	:.:: :: ::::::::::::::	AUCCGUACCCUCCGUAACCCUU
chr5D:443016485-443017017(-)	444-465	2.5	zma-miR2118e/	22	UAGGGCUGGGAGGCAUCAGGAA	::::. ::::::.:::::::::	AUCCUUACCCUCUGUAGUCCUU
chr5D:44427270-44427766(+)	406-427	4	zma-miR2118e/	22	UAGAAAUGGGAGUCGUCAGGAA	::: :::::::: :.:::::::	AUCCUUACCCUCUGUAGUCCUU
chr5D:446768733-446769456(-)	614-635	4	osa-miR2118e/osa-miR2118r/	22	UAGGCCUGAGAGGCAUCGGGAA	::::: :: ::::::: :::::	AUCCGUACCCUCCGUAACCCUU
chr5D:447977748-447978830(+)	992-1013	3	osa-miR2118e/osa-miR2118r/	22	UCGGAAUAGGAGGCAUUGGGAA	: :: :: ::::::::::::::	AUCCGUACCCUCCGUAACCCUU
chr5D:447985731-447986561(+)	742-763	4	zma-miR2118e/	22	UCGGAAUAGGAGGCAUUAGGAA	: ::::: ::::.:::.:::::	AUCCUUACCCUCUGUAGUCCUU
chr5D:451688049-451688816(-)	677-698	3	zma-miR2118e/	22	UAGGAAGGAGAGGCAUCAGGAA	:::::: : :::.:::::::::	AUCCUUACCCUCUGUAGUCCUU
chr5D:484667267-484668185(-)	809-830	4	zma-miR2118e/	22	CCGGAAGGAGAGACAUCAGGAA	:::: : :::::::::::::	AUCCUUACCCUCUGUAGUCCUU
chr5D:484704329-484705157(-)	719-740	2.5	zma-miR2118e/	22	CGGGAAUGAGAGACAUCAGGAA	.:::::: :::::::::::::	AUCCUUACCCUCUGUAGUCCUU
chr5D:484815425-484815961(-)	446-467	3.5	zma-miR2118e/	22	CGGGAACGAGAGACAUCAGGAA	.:::: : :::::::::::::	AUCCUUACCCUCUGUAGUCCUU
chr5D:503807326-503807988(+)	595-616	4	osa-miR2118e/osa-miR2118r/	22	UGGGCGUGGGAGGCAUGGGGGA	:.:::.:::::::::: :::.:	AUCCGUACCCUCCGUAACCCUU
chr5D:503855991-503856550(+)	511-532	3.5	osa-miR2118e/osa-miR2118r/	22	UGGACAUGGGAGGCAUGGGGAA	:.: :::::::::::: :::::	AUCCGUACCCUCCGUAACCCUU
chr5D:503877178-503878122(+)	835-856	3	osa-miR2118e/osa-miR2118r/	22	UGGGCGUGGGAGGCAUGGGGAA	:.:::.:::::::::: :::::	AUCCGUACCCUCCGUAACCCUU
chr5D:503882088-503882796(+)	620-641	2.5	osa-miR2118e/osa-miR2118r/	22	UGGGCAUGGGAGGCAUGGGGAA	:.:::::::::::::: :::::	AUCCGUACCCUCCGUAACCCUU
chr5D:504037909-504038508(+)	553-574	4	osa-miR2118e/osa-miR2118r/	22	UGAGCGUGGGAGGCAUCGGGAA	:. ::.:::::::::: :::::	AUCCGUACCCUCCGUAACCCUU
chr5D:504102786-504103598(+)	764-785	3.5	osa-miR2118e/osa-miR2118r/	22	UGGGCAUGGGAGGCAUGGGGGA	:.:::::::::::::: :::.:	AUCCGUACCCUCCGUAACCCUU
chr5D:504191592-504192441(+)	740-761	3.5	osa-miR2118e/osa-miR2118r/	22	UCGGCGUGGGAGGCAUGGGGAA	: :::.:::::::::: :::::	AUCCGUACCCUCCGUAACCCUU
chr5D:504193153-504193878(+)	616-637	3	osa-miR2118e/osa-miR2118r/	22	UGGGCGUGGGAGGCAUGGGGAA	:.:::.:::::::::: :::::	AUCCGUACCCUCCGUAACCCUU
chr5D:504485526-504486043(+)	427-448	3.5	osa-miR2118e/osa-miR2118r/	22	UGGUCAUGGGAGGCAUGGGGAA	:.: :::::::::::: :::::	AUCCGUACCCUCCGUAACCCUU
chr5D:504571973-504572467(+)	404-425	4	osa-miR2118e/osa-miR2118r/	22	UGAGCGUGGGAGGCAUGGGGAA	:. ::.:::::::::: :::::	AUCCGUACCCUCCGUAACCCUU
chr6A:17671334-17671975(-)	551-572	4	zma-miR2118e/	22	UAAGCAUGGGAGAUGUCAGGAA	:: : ::::::::..:::::::	AUCCUUACCCUCUGUAGUCCUU
chr6A:22790655-22791329(+)	467-488	4	zma-miR2118e/	22	UCAGAAUAGGAGACAUCAGGAU	: :::: :::::::::::::	AUCCUUACCCUCUGUAGUCCUU
chr6A:24200942-24201518(+)	509-530	3.5	zma-miR2118e/	22	UGAGGAUAGGAGACAUCAGGAG	:. :.:: :::::::::::::.	AUCCUUACCCUCUGUAGUCCUU
chr6A:24240317-24240857(+)	470-491	4	zma-miR2118e/	22	UGGGAGUAGGAGGCGUCAGGAA	:.:::.: ::::.:.:::::::	AUCCUUACCCUCUGUAGUCCUU
chr6A:558959710-558960376(-)	557-578	3	osa-miR2118e/osa-miR2118r/	22	UAGGCAUGAGAGGCAUGGGGAA	:::::::: ::::::: :::::	AUCCGUACCCUCCGUAACCCUU
chr6A:592621525-592622318(+)	684-705	4	zma-miR2118e/	22	UAGGACUGGGAGACAUCGGUAA	::::: :::::::::::.: ::	AUCCUUACCCUCUGUAGUCCUU
chr6A:97091809-97092431(+)	532-553	2	zma-miR2118e/	22	UAGGAUUGGGAGACAUUAGGAA	::::: ::::::::::.:::::	AUCCUUACCCUCUGUAGUCCUU
chr6A:97354939-97355643(+)	614-635	3	zma-miR2118e/	22	UAGGAUUUGGAGACAUUAGGAA	::::: : ::::::::.:::::	AUCCUUACCCUCUGUAGUCCUU
chr6A:97575802-97576568(+)	741-762	3	zma-miR2118e/	22	UAGGAUUCGGAGACAUUAGGAA	::::: : ::::::::.:::::	AUCCUUACCCUCUGUAGUCCUU
chr6A:97580459-97581248(+)	701-722	4	zma-miR2118e/	22	UAGGAUUGGAAGACAUUAGGAA	::::: ::: ::::::.:::::	AUCCUUACCCUCUGUAGUCCUU
chr6B:100298575-100299113(-)	448-469	2	osa-miR2118e/osa-miR2118r/	22	UCGGCUUGGGAGGCAUUGGGAA	: ::: ::::::::::::::::	AUCCGUACCCUCCGUAACCCUU
chr6B:102078704-102079303(+)	532-553	4	zma-miR2118e/	22	UAGGCAUAGAAGACAUCAGGAA	:::: :: : ::::::::::::	AUCCUUACCCUCUGUAGUCCUU
chr6B:10616675-10617339(+)	574-595	3	zma-miR2118e/	22	UAGGCAUGGGAGACAUAAGGAA	:::: ::::::::::: :::::	AUCCUUACCCUCUGUAGUCCUU
chr6B:124992042-124992725(-)	593-614	3	zma-miR2118e/	22	UAGGAAUAGGAGGCAUCAGGAU	::::::: ::::.::::::::	AUCCUUACCCUCUGUAGUCCUU
chr6B:125341631-125342421(-)	700-721	4	zma-miR2118e/	22	UAGGAAUAGGAGCCAUCAGGAU	::::::: :::: ::::::::	AUCCUUACCCUCUGUAGUCCUU
chr6B:154275047-154275901(+)	785-806	3	zma-miR2118e/	22	UAGGAUUUGGAGACAUUAGGAA	::::: : ::::::::.:::::	AUCCUUACCCUCUGUAGUCCUU
chr6B:154397420-154398168(+)	658-679	2.5	zma-miR2118e/	22	UAGGAUUUGGAGACAUCAGGAG	::::: : :::::::::::::.	AUCCUUACCCUCUGUAGUCCUU
chr6B:154833141-154834043(+)	740-761	2	zma-miR2118e/	22	UAGGAAUCGGAGACAUUAGGAA	::::::: ::::::::.:::::	AUCCUUACCCUCUGUAGUCCUU
chr6B:155196046-155196802(+)	666-687	2	zma-miR2118e/	22	UAGGAAUUGGAGACAUUAGGAA	::::::: ::::::::.:::::	AUCCUUACCCUCUGUAGUCCUU
chr6B:155198869-155199344(+)	385-406	4	zma-miR2118e/	22	UAGGAUUUGGAGGCAUUAGGAA	::::: : ::::.:::.:::::	AUCCUUACCCUCUGUAGUCCUU
chr6B:155332721-155333404(+)	593-614	4	zma-miR2118e/	22	UUGGAAUAGGAGGCAUUAGGAA	: ::::: ::::.:::.:::::	AUCCUUACCCUCUGUAGUCCUU
chr6B:15805629-15806517(+)	742-763	3.5	zma-miR2118e/	22	AGGGAAUAGGAGACGUCAGGAA	.::::: ::::::.:::::::	AUCCUUACCCUCUGUAGUCCUU
chr6B:30115619-30116219(-)	490-511	3.5	zma-miR2118e/	22	UGAGCAUGGGAGACGUCAGGAA	:. : :::::::::.:::::::	AUCCUUACCCUCUGUAGUCCUU
chr6B:39209341-39210081(+)	650-671	3.5	zma-miR2118e/	22	UGAGAAUAGGAGACAUCAGGAU	:. :::: :::::::::::::	AUCCUUACCCUCUGUAGUCCUU
chr6B:39293675-39294313(+)	550-571	4	zma-miR2118e/	22	UCAGAAUAGGAGACAUCAGGAU	: :::: :::::::::::::	AUCCUUACCCUCUGUAGUCCUU
chr6B:39303128-39304195(+)	977-998	4	zma-miR2118e/	22	UCAGAAUAGGAGACAUCAGGAU	: :::: :::::::::::::	AUCCUUACCCUCUGUAGUCCUU
chr6B:42739126-42739668(-)	473-494	3.5	zma-miR2118e/	22	UGAGAAUAGGAGGCAUCAGGAA	:. :::: ::::.:::::::::	AUCCUUACCCUCUGUAGUCCUU
chr6B:623338670-623339564(-)	784-805	3.5	zma-miR2118e/	22	UAGGGAUGAGAGGUAUCAGGAA	::::.::: :::..::::::::	AUCCUUACCCUCUGUAGUCCUU
chr6B:665517009-665517734(-)	637-658	4	zma-miR2118e/	22	UAGGCAUAGGAGACAUCAAGAA	:::: :: :::::::::: :::	AUCCUUACCCUCUGUAGUCCUU
chr6B:94001761-94002341(-)	491-512	3.5	osa-miR2118e/osa-miR2118r/	22	GGGGCUUGUGAGGCAUUGGGAA	.::: :: :::::::::::::	AUCCGUACCCUCCGUAACCCUU
chr6D:25470325-25471090(-)	656-676	4	zma-miR2118e/	22	UAG-AAUAGGAGACGUCAGGAU	::: ::: ::::::.::::::	AUCCUUACCCUCUGUAGUCCUU
chr6D:25488441-25489059(-)	493-513	3	zma-miR2118e/	22	UAG-AAUAGGAGACAUCAGGAU	::: ::: :::::::::::::	AUCCUUACCCUCUGUAGUCCUU
chr6D:430398454-430399319(-)	777-798	3	zma-miR2118e/	22	UAGGAUUGGGAGACAUCGGGGA	::::: :::::::::::.::.:	AUCCUUACCCUCUGUAGUCCUU
chr6D:445989618-445990299(+)	593-614	4	zma-miR2118e/	22	UAGGACUGGGAGACAUCGGUAA	::::: :::::::::::.: ::	AUCCUUACCCUCUGUAGUCCUU
chr6D:468951213-468951796(-)	493-514	3.5	osa-miR2118e/osa-miR2118r/	22	UAGGUUUGGGAGGCAUUAGGAA	::::. ::::::::::: ::::	AUCCGUACCCUCCGUAACCCUU
chr6D:468951213-468951796(-)	493-514	4	zma-miR2118e/	22	UAGGUUUGGGAGGCAUUAGGAA	:::: ::::::.:::.:::::	AUCCUUACCCUCUGUAGUCCUU
chr6D:46910014-46910720(+)	616-637	3	zma-miR2118e/	22	UAGGAAUAGGAGGCAUCAGGAC	::::::: ::::.::::::::	AUCCUUACCCUCUGUAGUCCUU
chr6D:55077096-55078052(-)	887-908	3	zma-miR2118e/	22	UAGGAAUAGGAGCCAUCAGGAA	::::::: :::: :::::::::	AUCCUUACCCUCUGUAGUCCUU
chr6D:55313764-55314429(-)	575-596	1	zma-miR2118e/	22	UAGGAAUAGGAGACAUCAGGAA	::::::: ::::::::::::::	AUCCUUACCCUCUGUAGUCCUU
chr6D:80599152-80599751(+)	509-530	2	zma-miR2118e/	22	UAGGAUUGGGAGACAUUAGGAA	::::: ::::::::::.:::::	AUCCUUACCCUCUGUAGUCCUU
chr6D:80605905-80606612(+)	617-638	4	zma-miR2118e/	22	UAGGAUUCAGAGGCAUCAGGAA	::::: : :::.:::::::::	AUCCUUACCCUCUGUAGUCCUU
chr6D:81110163-81110806(+)	553-574	4	zma-miR2118e/	22	UAGGAUUUGGAGGCAUUAGGAA	::::: : ::::.:::.:::::	AUCCUUACCCUCUGUAGUCCUU
chr6D:81171628-81172506(+)	790-811	4	zma-miR2118e/	22	UUGGAAUUGGAGGCAUUAGGAA	: ::::: ::::.:::.:::::	AUCCUUACCCUCUGUAGUCCUU
chr6D:81212090-81212935(+)	818-839	4	zma-miR2118e/	22	UUGGAAUUGGAGGCAUUAGGAA	: ::::: ::::.:::.:::::	AUCCUUACCCUCUGUAGUCCUU
chr7A:107527132-107527803(-)	583-604	3	zma-miR2118e/	22	UAGGAAUGGGAGACAUGGGGAA	:::::::::::::::: .::::	AUCCUUACCCUCUGUAGUCCUU
chr7A:109162053-109162841(+)	721-742	3.5	zma-miR2118e/	22	UGAGAAUGGGAGAUAUCGGGAA	:. ::::::::::.:::.::::	AUCCUUACCCUCUGUAGUCCUU
chr7A:112338052-112339027(+)	865-887	4	zma-miR2118e/	22	UAGGCAUGGGAGGCAUCAGAGAA	:::: :::::::.:::::: :::	AUCCUUACCCUCUGUAGUC-CUU
chr7A:112355390-112356302(+)	823-845	4	zma-miR2118e/	22	UAGGAAUGGGAGGCAUCGGAGAA	::::::::::::.::::.: :::	AUCCUUACCCUCUGUAGUC-CUU
chr7A:112690368-112691076(+)	638-660	2	osa-miR2118e/osa-miR2118r/	22	UAGGCAUGGGAGGCAUUGGAGAA	::::::::::::::::::: :::	AUCCGUACCCUCCGUAACC-CUU
chr7A:115320826-115321803(+)	907-929	4	zma-miR2118e/	22	UGGGAGUAGGAGACAUCCAGGAA	:.:::.: ::::::::: :::::	AUCCUUACCCUCUGUAG-UCCUU
chr7A:32038043-32039014(+)	862-883	4	zma-miR2118e/	22	CAGGAACUGGAGACAUCAGGGA	::::: ::::::::::::.:	AUCCUUACCCUCUGUAGUCCUU
chr7A:35774103-35774681(+)	490-511	4	zma-miR2118e/	22	AGGGAAUUGGAGACAUCGGGAG	.::::: :::::::::.:::.	AUCCUUACCCUCUGUAGUCCUU
chr7A:37919415-37919993(+)	488-509	4	zma-miR2118e/	22	UAGGAUUGGAAGACAUUAGGAA	::::: ::: ::::::.:::::	AUCCUUACCCUCUGUAGUCCUU
chr7A:40705748-40706549(-)	637-658	3.5	zma-miR2118e/	22	AGGGAAUAGGAGACAUCGGGAA	.::::: :::::::::.::::	AUCCUUACCCUCUGUAGUCCUU
chr7A:42637468-42638254(+)	698-719	3	zma-miR2118e/	22	UAGGAAUGGGAGACAUCGAGAA	:::::::::::::::::. :::	AUCCUUACCCUCUGUAGUCCUU
chr7A:42690314-42691259(+)	847-868	3.5	zma-miR2118e/	22	AGGGAAUGAGAGACAUCGGGAA	.:::::: ::::::::.::::	AUCCUUACCCUCUGUAGUCCUU
chr7A:54931537-54932113(+)	467-488	2	osa-miR2118e/osa-miR2118r/	22	UAGGCUUGGGAGGCAUUGGGGA	::::: ::::::::::::::.:	AUCCGUACCCUCCGUAACCCUU
chr7A:647303083-647303684(-)	511-532	4	osa-miR2118e/osa-miR2118r/	22	UAGGCAUGAGAGGUAUUAGGAA	:::::::: ::::.::: ::::	AUCCGUACCCUCCGUAACCCUU
chr7A:650606318-650606982(+)	595-616	4	osa-miR2118e/osa-miR2118r/	22	UUGGCUUGAGAGGCAUUGGGAC	: ::: :: ::::::::::::	AUCCGUACCCUCCGUAACCCUU
chr7A:690071495-690072202(-)	616-637	3.5	osa-miR2118e/osa-miR2118r/	22	UAGAUAUGGGAGGCAUUAGGAA	::: .:::::::::::: ::::	AUCCGUACCCUCCGUAACCCUU
chr7A:690071495-690072202(-)	616-637	4	zma-miR2118e/	22	UAGAUAUGGGAGGCAUUAGGAA	::: :::::::.:::.:::::	AUCCUUACCCUCUGUAGUCCUU
chr7A:75000701-75001408(+)	661-682	4	zma-miR2118e/	22	UGAGAGUAGGAGACAUCAGGAU	:. ::.: :::::::::::::	AUCCUUACCCUCUGUAGUCCUU
chr7B:11203074-11203859(+)	658-679	4	zma-miR2118e/	22	UGAGAGUAGGAGACGUCAGGAA	:. ::.: ::::::.:::::::	AUCCUUACCCUCUGUAGUCCUU
chr7B:610097043-610097781(+)	648-669	3.5	zma-miR2118e/	22	UAGGAGUGGUAGGCAUCAGGAA	:::::.::: ::.:::::::::	AUCCUUACCCUCUGUAGUCCUU
chr7B:612321743-612322300(+)	488-509	4	zma-miR2118e/	22	UCGGCAUGAGAGGCAUCAGGAA	: :: ::: :::.:::::::::	AUCCUUACCCUCUGUAGUCCUU
chr7B:616493294-616493937(-)	553-574	4	osa-miR2118e/osa-miR2118r/	22	UUGGUGUGGGAGGCAUCGGGAA	: ::..:::::::::: :::::	AUCCGUACCCUCCGUAACCCUU
chr7B:616715024-616715558(-)	446-467	3.5	osa-miR2118e/osa-miR2118r/	22	UAAGCAUGAGAGGUAUUGGGAG	:: ::::: ::::.:::::::.	AUCCGUACCCUCCGUAACCCUU
chr7B:633898656-633899339(-)	574-595	4	zma-miR2118e/	22	UAGGAAUAGGAUGCAUCAGGAA	::::::: ::: .:::::::::	AUCCUUACCCUCUGUAGUCCUU
chr7B:65165316-65165853(-)	448-470	4	osa-miR2118e/osa-miR2118r/	22	UAGAAAUGGGAGGCAUUGGAGAA	::: :::::::::::::: :::	AUCCGUACCCUCCGUAACC-CUU
chr7B:66502728-66503521(+)	698-719	2	osa-miR2118e/osa-miR2118r/	22	UAGGACUGGGAGGCAUUGGGAA	:::: ::::::::::::::::	AUCCGUACCCUCCGUAACCCUU
chr7B:66502728-66503521(+)	698-719	4	zma-miR2118e/	22	UAGGACUGGGAGGCAUUGGGAA	::::: ::::::.:::..::::	AUCCUUACCCUCUGUAGUCCUU
chr7B:677662465-677663281(+)	724-745	3	osa-miR2118e/osa-miR2118r/	22	UAGGCUUGGGAGGCAUUAGGAA	::::: ::::::::::: ::::	AUCCGUACCCUCCGUAACCCUU
chr7B:677662465-677663281(+)	724-745	4	zma-miR2118e/	22	UAGGCUUGGGAGGCAUUAGGAA	:::: ::::::.:::.:::::	AUCCUUACCCUCUGUAGUCCUU
chr7D:106173948-106174547(-)	510-532	4	zma-miR2118e/	22	UAGGCAUGGAAGACAUCAGAGAA	:::: :::: ::::::::: :::	AUCCUUACCCUCUGUAGUC-CUU
chr7D:106918175-106918963(+)	678-700	4	zma-miR2118e/	22	UAGGCAUGGGAGGCAUCAGAGAA	:::: :::::::.:::::: :::	AUCCUUACCCUCUGUAGUC-CUU
chr7D:107327921-107328541(+)	550-572	4	osa-miR2118e/osa-miR2118r/	22	UAGGCAUGGGAGGCAUCGGAGAA	:::::::::::::::: :: :::	AUCCGUACCCUCCGUAACC-CUU
chr7D:109488652-109489708(+)	946-968	4	zma-miR2118e/	22	UGGGAGUAGGAGACAUCCAGGAA	:.:::.: ::::::::: :::::	AUCCUUACCCUCUGUAG-UCCUU
chr7D:109535374-109536080(+)	615-637	4	zma-miR2118e/	22	UGGGAGUAGGAGACAUCCAGGAA	:.:::.: ::::::::: :::::	AUCCUUACCCUCUGUAG-UCCUU
chr7D:109587471-109587923(+)	361-383	4	zma-miR2118e/	22	UGGGAGGGGGAGACAUCCAGGAA	:.:::. :::::::::: :::::	AUCCUUACCCUCUGUAG-UCCUU
chr7D:109857135-109858051(+)	825-847	3.5	zma-miR2118e/	22	UGGGAAGGGGAGACAUCCAGGAA	:.:::: :::::::::: :::::	AUCCUUACCCUCUGUAG-UCCUU
chr7D:111218759-111219819(+)	972-993	2	zma-miR2118e/	22	UAAGAAUAGGAGACAUCAGGAA	:: :::: ::::::::::::::	AUCCUUACCCUCUGUAGUCCUU
chr7D:121787464-121787939(+)	427-448	4	zma-miR2118e/	22	UAUGAAUGGGAAGCAUCAGGAA	:: :::::::: .:::::::::	AUCCUUACCCUCUGUAGUCCUU
chr7D:13408639-13409194(+)	446-467	2.5	zma-miR2118e/	22	UGAGAAUAGGAGACAUCAGGAA	:. :::: ::::::::::::::	AUCCUUACCCUCUGUAGUCCUU
chr7D:13744477-13745269(+)	596-617	3	zma-miR2118e/	22	UACGAAUAGGAGACGUCAGGAA	:: :::: ::::::.:::::::	AUCCUUACCCUCUGUAGUCCUU
chr7D:137785108-137785649(-)	472-493	4	osa-miR2118e/osa-miR2118r/	22	UAAGCUUGGGAGGCAUCGGGAA	:: :: :::::::::: :::::	AUCCGUACCCUCCGUAACCCUU
chr7D:14021907-14022581(+)	584-605	3	zma-miR2118e/	22	UAAGAAUGGGAGACCUCAGGAA	:: ::::::::::: :::::::	AUCCUUACCCUCUGUAGUCCUU
chr7D:35547656-35548222(-)	457-478	3	zma-miR2118e/	22	AGGGAAUGGGAGGCAUCAGGAG	.::::::::::.::::::::.	AUCCUUACCCUCUGUAGUCCUU
chr7D:36464480-36465165(-)	616-637	3	zma-miR2118e/	22	UGGGAGUGGGAGACAUUGGGAA	:.:::.::::::::::..::::	AUCCUUACCCUCUGUAGUCCUU
chr7D:36464480-36465165(-)	616-637	4	osa-miR2118e/osa-miR2118r/	22	UGGGAGUGGGAGACAUUGGGAA	:.:: .:::::: :::::::::	AUCCGUACCCUCCGUAACCCUU
chr7D:38074527-38075265(+)	629-650	3.5	zma-miR2118e/	22	CGGGAAUUGGAGACAUCAGGAC	.::::: :::::::::::::	AUCCUUACCCUCUGUAGUCCUU
chr7D:38258011-38258988(+)	929-950	3	zma-miR2118e/	22	UAGGAAUCAGAGACAUCAGGAU	::::::: ::::::::::::	AUCCUUACCCUCUGUAGUCCUU
chr7D:38498905-38499361(+)	364-385	2.5	zma-miR2118e/	22	UAGGAAUUAGAGACAUCAGGAG	::::::: ::::::::::::.	AUCCUUACCCUCUGUAGUCCUU
chr7D:38631536-38632116(+)	490-511	3	zma-miR2118e/	22	UGGGAAUACGAGACAUCAGGAG	:.::::: ::::::::::::.	AUCCUUACCCUCUGUAGUCCUU
chr7D:38651568-38652230(+)	572-593	2.5	zma-miR2118e/	22	UAGGAAUUAGAGACAUCAGGAG	::::::: ::::::::::::.	AUCCUUACCCUCUGUAGUCCUU
chr7D:39520857-39521710(-)	763-784	4	osa-miR2118e/osa-miR2118r/	22	UAGAAAUGGGAGGCAUUGAGAA	::: ::::::::::::: :::	AUCCGUACCCUCCGUAACCCUU
chr7D:39550940-39551623(-)	574-595	4	osa-miR2118e/osa-miR2118r/	22	UAGAAAUGGAAGGCAUUGGGAA	::: :::: ::::::::::::	AUCCGUACCCUCCGUAACCCUU
chr7D:39953212-39954170(+)	868-889	4	zma-miR2118e/	22	UAAGAACAGGAGACGUCAGGAA	:: ::: ::::::.:::::::	AUCCUUACCCUCUGUAGUCCUU
chr7D:43075456-43076121(+)	556-577	4	zma-miR2118e/	22	UAGGAAUCGGGGACAUCCGGAA	::::::: ::.:::::: ::::	AUCCUUACCCUCUGUAGUCCUU
chr7D:44300522-44301015(+)	405-426	4	zma-miR2118e/	22	UUGGAAUGGGAGGAAUCAGGAA	: ::::::::::. ::::::::	AUCCUUACCCUCUGUAGUCCUU
chr7D:51828084-51828893(+)	719-740	4	zma-miR2118e/	22	UAUGAAUAGGAGACAACAGGAA	:: :::: ::::::: ::::::	AUCCUUACCCUCUGUAGUCCUU
chr7D:52408633-52409402(+)	679-700	4	osa-miR2118e/osa-miR2118r/	22	UAGGCUUGAGAGGUAUUGGGGA	::::: :: ::::.::::::.:	AUCCGUACCCUCCGUAACCCUU
chr7D:55529433-55530410(-)	868-889	4	zma-miR2118e/	22	UGAGAGCGGGAGACAUCGGGAA	:. ::. ::::::::::.::::	AUCCUUACCCUCUGUAGUCCUU
chr7D:55647312-55648025(-)	604-625	3.5	zma-miR2118e/	22	UGAGAAUGGGAGACGUCGGGAA	:. :::::::::::.::.::::	AUCCUUACCCUCUGUAGUCCUU
chr7D:597122522-597123102(-)	490-511	3.5	osa-miR2118e/osa-miR2118r/	22	UAGAUAUGGGAGGCAUUAGGAA	::: .:::::::::::: ::::	AUCCGUACCCUCCGUAACCCUU
chr7D:597122522-597123102(-)	490-511	4	zma-miR2118e/	22	UAGAUAUGGGAGGCAUUAGGAA	::: :::::::.:::.:::::	AUCCUUACCCUCUGUAGUCCUU
chr7D:597178437-597178975(-)	469-490	3.5	osa-miR2118e/osa-miR2118r/	22	UAGAUAUGGGAGGCAUUAGGAA	::: .:::::::::::: ::::	AUCCGUACCCUCCGUAACCCUU
chr7D:597178437-597178975(-)	469-490	4	zma-miR2118e/	22	UAGAUAUGGGAGGCAUUAGGAA	::: :::::::.:::.:::::	AUCCUUACCCUCUGUAGUCCUU
chr7D:69201783-69202531(+)	658-679	4	zma-miR2118e/	22	UGCGAGUAGGAGACAUCAGGAC	:. ::.: :::::::::::::	AUCCUUACCCUCUGUAGUCCUU
chrUn:179807748-179808347(-)	502-524	4	osa-miR2118e/osa-miR2118r/	22	UAGGCUUGGAAGGCAAUUGGGAA	::::: ::: ::::: :::::::	AUCCGUACCCUCCGU-AACCCUU
chrUn:21558984-21559627(-)	595-616	3	osa-miR2118e/osa-miR2118r/	22	UAGGCUUAAGAGGCAUUGGGAA	::::: : :::::::::::::	AUCCGUACCCUCCGUAACCCUU
chrUn:21754250-21755027(-)	687-708	3	osa-miR2118e/osa-miR2118r/	22	UAGGCUUGGGAGGCAAUGGGAA	::::: ::::::::: ::::::	AUCCGUACCCUCCGUAACCCUU
chrUn:24237900-24238455(-)	467-488	3.5	osa-miR2118e/osa-miR2118r/	22	UGAGCAUGUGAGGUAUUGGGAA	:. ::::: ::::.::::::::	AUCCGUACCCUCCGUAACCCUU
chrUn:310084446-310085398(-)	807-829	4	zma-miR2118e/	22	UAGGCAUGGAAGACAUCAGAGAA	:::: :::: ::::::::: :::	AUCCUUACCCUCUGUAGUC-CUU
chrUn:32002483-32003181(+)	512-533	3.5	zma-miR2118e/	22	UGAGAACAGGAGACAUCAGGAA	:. ::: ::::::::::::::	AUCCUUACCCUCUGUAGUCCUU
chrUn:374381158-374382115(-)	597-618	3.5	zma-miR2118e/	22	UUGGGUUGGGAGACAUCAGGAC	: ::. :::::::::::::::	AUCCUUACCCUCUGUAGUCCUU
chrUn:48814153-48814898(-)	635-656	3.5	zma-miR2118e/	22	AGGGAAUAGGAGACAUCGGGAA	.::::: :::::::::.::::	AUCCUUACCCUCUGUAGUCCUU
chrUn:92630812-92631455(-)	553-574	4	zma-miR2118e/	22	UAGGAAUAGGAUGCAUCAGGAA	::::::: ::: .:::::::::	AUCCUUACCCUCUGUAGUCCUU
chrUn:93716864-93717440(+)	467-488	3	zma-miR2118e/	22	UGAGAAUAGGAGACAUCAGGAG	:. :::: :::::::::::::.	AUCCUUACCCUCUGUAGUCCUU
chr1A:22984566-22985320(-)	687-708	4	osa-miR2118f/osa-miR2118j/osa-miR2118m/bdi-miR2118b/	22	UAGAAAUGAGAGGAAUCAGGAA	::: :::: :::: ::::::::	AUCCUUACCCUCCGUAGUCCUU
chr1A:437233084-437233851(-)	656-677	4	osa-miR2118f/osa-miR2118j/osa-miR2118m/bdi-miR2118b/	22	UAGGAUUUGGAUGCAUCAGGAA	::::: : ::: ::::::::::	AUCCUUACCCUCCGUAGUCCUU
chr1A:494189370-494189951(-)	462-483	3	osa-miR2118f/osa-miR2118j/osa-miR2118m/bdi-miR2118b/	22	UUGGAAUGGGAGGCAUCAGAAA	: ::::::::::::::::: ::	AUCCUUACCCUCCGUAGUCCUU
chr1A:504410695-504411416(+)	631-652	3.5	zma-miR2118f/	22	UGGGCAUGGGAUGCAUUGGGAA	:.:::::::.: ::::::::::	AUCCGUACCUUCCGUAACCCUU
chr1A:520433240-520434332(-)	1002-1023	3	osa-miR2118f/osa-miR2118j/osa-miR2118m/bdi-miR2118b/	22	UAGGCAUAUGAGGCAUCAGGAA	:::: :: :::::::::::::	AUCCUUACCCUCCGUAGUCCUU
chr1A:543386158-543386715(-)	488-509	3.5	osa-miR2118f/osa-miR2118j/osa-miR2118m/bdi-miR2118b/	22	UAGGGAUUGGAAGCAUCAGGAA	::::.:: ::: ::::::::::	AUCCUUACCCUCCGUAGUCCUU
chr1A:556803809-556804494(+)	595-616	4	osa-miR2118f/osa-miR2118j/osa-miR2118m/bdi-miR2118b/	22	UAGGCAUAGGAGGCACCAGGAA	:::: :: ::::::: ::::::	AUCCUUACCCUCCGUAGUCCUU
chr1A:556813879-556814602(+)	614-635	4	osa-miR2118f/osa-miR2118j/osa-miR2118m/bdi-miR2118b/	22	UAGGCAUAGGAGGCACCAGGAA	:::: :: ::::::: ::::::	AUCCUUACCCUCCGUAGUCCUU
chr1A:556815712-556816776(+)	974-995	4	osa-miR2118f/osa-miR2118j/osa-miR2118m/bdi-miR2118b/	22	UAGGCAUAGGAGGCACCAGGAA	:::: :: ::::::: ::::::	AUCCUUACCCUCCGUAGUCCUU
chr1B:21331620-21332280(+)	572-593	4	osa-miR2118f/osa-miR2118j/osa-miR2118m/bdi-miR2118b/	22	UAGGCUUGGGAGGCAUUAGGAC	:::: ::::::::::.::::	AUCCUUACCCUCCGUAGUCCUU
chr1B:31912023-31912622(+)	490-511	4	zma-miR2118f/	22	UAGACAUGGGAGGCAUAGGGAA	::: :::::.:::::: :::::	AUCCGUACCUUCCGUAACCCUU
chr1B:32067452-32068177(+)	635-656	4	zma-miR2118f/	22	UAGACAUGGGAGGCAUAGGGAA	::: :::::.:::::: :::::	AUCCGUACCUUCCGUAACCCUU
chr1B:374320212-374320664(-)	364-385	4	zma-miR2118f/	22	UAGGGAUGGGCGGCAUUGGGAA	:::: ::::. :::::::::::	AUCCGUACCUUCCGUAACCCUU
chr1B:566022243-566022863(+)	530-551	3.5	osa-miR2118f/osa-miR2118j/osa-miR2118m/bdi-miR2118b/	22	GGGGAAUGGGAGGCAUCAAGAA	.:::::::::::::::: :::	AUCCUUACCCUCCGUAGUCCUU
chr1B:573753723-573754323(-)	509-530	3.5	osa-miR2118f/osa-miR2118j/osa-miR2118m/bdi-miR2118b/	22	UGGGCAUAUGAGGCAUCAGGAA	:.:: :: :::::::::::::	AUCCUUACCCUCCGUAGUCCUU
chr1B:592210676-592211359(-)	593-614	4	zma-miR2118f/	22	UCGGGAUGAGAGGCAUUGGGAA	: :: ::: .::::::::::::	AUCCGUACCUUCCGUAACCCUU
chr1B:612988592-612989109(-)	448-469	3	osa-miR2118f/osa-miR2118j/osa-miR2118m/bdi-miR2118b/	22	UAGGAUUUAGAGGCAUCAGGAA	::::: : :::::::::::::	AUCCUUACCCUCCGUAGUCCUU
chr1B:640443419-640444014(-)	486-507	4	osa-miR2118f/osa-miR2118j/osa-miR2118m/bdi-miR2118b/	22	UAGGCCUGGGAGGCACCAGGAA	:::: ::::::::: ::::::	AUCCUUACCCUCCGUAGUCCUU
chr1B:640481384-640481866(-)	392-413	3	osa-miR2118f/osa-miR2118j/osa-miR2118m/bdi-miR2118b/	22	UAGGCAUAGGGGGCAUCAGGAA	:::: :: ::.:::::::::::	AUCCUUACCCUCCGUAGUCCUU
chr1B:666289892-666290554(-)	637-658	3.5	zma-miR2118f/	22	UAGGUAUGGGAGGCAUAGGGAA	::::.::::.:::::: :::::	AUCCGUACCUUCCGUAACCCUU
chr1B:666289892-666290554(-)	637-658	4	osa-miR2118f/osa-miR2118j/osa-miR2118m/bdi-miR2118b/	22	UAGGUAUGGGAGGCAUAGGGAA	:::: ::::::::::: .::::	AUCCUUACCCUCCGUAGUCCUU
chr1D:415460637-415461218(+)	491-512	3	osa-miR2118f/osa-miR2118j/osa-miR2118m/bdi-miR2118b/	22	UCGAAAUAGGAGGCAUCAGGAA	: : ::: ::::::::::::::	AUCCUUACCCUCCGUAGUCCUU
chr1D:416093898-416094887(+)	880-901	4	osa-miR2118f/osa-miR2118j/osa-miR2118m/bdi-miR2118b/	22	UGGGAAUGGGAUGCAUUAGGAG	:.::::::::: ::::.::::.	AUCCUUACCCUCCGUAGUCCUU
chr1D:424538057-424538625(-)	478-499	3.5	osa-miR2118f/osa-miR2118j/osa-miR2118m/bdi-miR2118b/	22	UGGGCAUAUGAGGCAUCAGGAA	:.:: :: :::::::::::::	AUCCUUACCCUCCGUAGUCCUU
chr1D:424596718-424597425(-)	617-638	3	osa-miR2118f/osa-miR2118j/osa-miR2118m/bdi-miR2118b/	22	UAGGCAUAUGAGGCAUCAGGAA	:::: :: :::::::::::::	AUCCUUACCCUCCGUAGUCCUU
chr1D:436979148-436979852(-)	637-658	4	osa-miR2118f/osa-miR2118j/osa-miR2118m/bdi-miR2118b/	22	UAGGAAUGGGCGGCAUUGGGAA	:::::::::: :::::..::::	AUCCUUACCCUCCGUAGUCCUU
chr1D:436979148-436979852(-)	637-658	4	zma-miR2118f/	22	UAGGAAUGGGCGGCAUUGGGAA	:::: ::::. :::::::::::	AUCCGUACCUUCCGUAACCCUU
chr1D:437547057-437547676(+)	531-552	4	osa-miR2118f/osa-miR2118j/osa-miR2118m/bdi-miR2118b/	22	UUGGAAUGAGAGGCAUUGGGAA	: :::::: :::::::..::::	AUCCUUACCCUCCGUAGUCCUU
chr1D:437547057-437547676(+)	531-552	4	zma-miR2118f/	22	UUGGAAUGAGAGGCAUUGGGAA	: :: ::: .::::::::::::	AUCCGUACCUUCCGUAACCCUU
chr1D:438028805-438029449(+)	554-575	4	osa-miR2118f/osa-miR2118j/osa-miR2118m/bdi-miR2118b/	22	UAGGAACGAGAGGCAUUGGGAA	:::::: : :::::::..::::	AUCCUUACCCUCCGUAGUCCUU
chr1D:438028805-438029449(+)	554-575	4	zma-miR2118f/	22	UAGGAACGAGAGGCAUUGGGAA	:::: : : .::::::::::::	AUCCGUACCUUCCGUAACCCUU
chr1D:439125865-439126685(-)	711-732	4	osa-miR2118f/osa-miR2118j/osa-miR2118m/bdi-miR2118b/	22	UAGGAAUAUGAGGCACCAGGAA	::::::: :::::: ::::::	AUCCUUACCCUCCGUAGUCCUU
chr1D:447460418-447461082(-)	574-595	3	osa-miR2118f/osa-miR2118j/osa-miR2118m/bdi-miR2118b/	22	UAGGAUUUAGAGGCAUCAGGAA	::::: : :::::::::::::	AUCCUUACCCUCCGUAGUCCUU
chr1D:447465705-447466404(-)	629-650	3.5	osa-miR2118f/osa-miR2118j/osa-miR2118m/bdi-miR2118b/	22	UAGGGAUUGGAAGCAUCAGGAA	::::.:: ::: ::::::::::	AUCCUUACCCUCCGUAGUCCUU
chr1D:447521191-447521750(-)	490-511	3	osa-miR2118f/osa-miR2118j/osa-miR2118m/bdi-miR2118b/	22	UAGGAUUUAGAGGCAUCAGGAA	::::: : :::::::::::::	AUCCUUACCCUCCGUAGUCCUU
chr1D:464296832-464297349(-)	427-448	4	osa-miR2118f/osa-miR2118j/osa-miR2118m/bdi-miR2118b/	22	UAGGCAUAGGAGGCACCAGGAA	:::: :: ::::::: ::::::	AUCCUUACCCUCCGUAGUCCUU
chr1D:464346605-464347227(+)	532-553	4	osa-miR2118f/osa-miR2118j/osa-miR2118m/bdi-miR2118b/	22	UAGGCAUAGGAGGCACCAGGAA	:::: :: ::::::: ::::::	AUCCUUACCCUCCGUAGUCCUU
chr1D:464374244-464374907(+)	596-617	4	osa-miR2118f/osa-miR2118j/osa-miR2118m/bdi-miR2118b/	22	UAGGCAUAGGAGGCACCAGGAA	:::: :: ::::::: ::::::	AUCCUUACCCUCCGUAGUCCUU
chr1D:490522303-490522863(-)	427-447	3	osa-miR2118f/osa-miR2118j/osa-miR2118m/bdi-miR2118b/	22	UAGGA-UGGGUGGCAUCAGGAA	::::: :::: :::::::::::	AUCCUUACCCUCCGUAGUCCUU
chr2A:19308782-19309920(+)	634-655	3	zma-miR2118f/	22	UAGGCAUGUGAGGCAUUGGGAU	:::::::: .:::::::::::	AUCCGUACCUUCCGUAACCCUU
chr2A:20956413-20956908(+)	405-426	4	osa-miR2118f/osa-miR2118j/osa-miR2118m/bdi-miR2118b/	22	UGAGUAUGUGAGGCAUCAGGAG	:. : ::: ::::::::::::.	AUCCUUACCCUCCGUAGUCCUU
chr2A:31889637-31890362(-)	635-656	4	osa-miR2118f/osa-miR2118j/osa-miR2118m/bdi-miR2118b/	22	UCGGAAUGGGAGGCAACAGGGA	: ::::::::::::: ::::.:	AUCCUUACCCUCCGUAGUCCUU
chr2A:733130152-733130648(-)	406-427	4	osa-miR2118f/osa-miR2118j/osa-miR2118m/bdi-miR2118b/	22	UAGGAAUGGGAGGUGUCGGGAU	:::::::::::::..::.:::	AUCCUUACCCUCCGUAGUCCUU
chr2B:2697037-2697599(+)	472-493	4	osa-miR2118f/osa-miR2118j/osa-miR2118m/bdi-miR2118b/	22	UAGGAACGAGAGGUAUUAGGAA	:::::: : ::::.::.:::::	AUCCUUACCCUCCGUAGUCCUU
chr2B:30023887-30024410(+)	433-454	3.5	zma-miR2118f/	22	CGGGCAUGGGAGGCAUUGGGAU	.:::::::.:::::::::::	AUCCGUACCUUCCGUAACCCUU
chr2B:647711577-647712262(-)	595-616	4	osa-miR2118f/osa-miR2118j/osa-miR2118m/bdi-miR2118b/	22	UUGGAUUUGGAGGCAUUAGGAA	: ::: : ::::::::.:::::	AUCCUUACCCUCCGUAGUCCUU
chr2B:690599585-690600207(+)	532-553	3.5	osa-miR2118f/osa-miR2118j/osa-miR2118m/bdi-miR2118b/	22	UAAGAGUAGGAGGCAUCGGGAA	:: ::.: :::::::::.::::	AUCCUUACCCUCCGUAGUCCUU
chr2D:20673791-20674472(-)	593-614	4	osa-miR2118f/osa-miR2118j/osa-miR2118m/bdi-miR2118b/	22	UGGGGUUAGGAGGCAUCGGGAA	:.::. : :::::::::.::::	AUCCUUACCCUCCGUAGUCCUU
chr2D:21426356-21426889(-)	446-467	4	osa-miR2118f/osa-miR2118j/osa-miR2118m/bdi-miR2118b/	22	UAGGACUGAGAGGCGUUAGGAA	::::: :: :::::.:.:::::	AUCCUUACCCUCCGUAGUCCUU
chr2D:351389781-351390401(-)	530-551	4	osa-miR2118f/osa-miR2118j/osa-miR2118m/bdi-miR2118b/	22	UAGGAAUAGGUGGCAUCGGGAA	::::::: :: ::::::.::::	AUCCUUACCCUCCGUAGUCCUU
chr2D:598886546-598886998(-)	362-383	2	osa-miR2118f/osa-miR2118j/osa-miR2118m/bdi-miR2118b/	22	UAGGAAUGGGAGGUGUCAGGAA	:::::::::::::..:::::::	AUCCUUACCCUCCGUAGUCCUU
chr2D:598893208-598893648(-)	350-371	3	osa-miR2118f/osa-miR2118j/osa-miR2118m/bdi-miR2118b/	22	UAGGAAUGGGAGGUGUCAGGAU	:::::::::::::..::::::	AUCCUUACCCUCCGUAGUCCUU
chr2D:6932604-6933353(-)	659-680	4	osa-miR2118f/osa-miR2118j/osa-miR2118m/bdi-miR2118b/	22	UAGGAACGAGAGGUAUUAGGAA	:::::: : ::::.::.:::::	AUCCUUACCCUCCGUAGUCCUU
chr2D:6948036-6948679(-)	553-574	4	osa-miR2118f/osa-miR2118j/osa-miR2118m/bdi-miR2118b/	22	UAGGAACGAGAGGUAUUAGGAA	:::::: : ::::.::.:::::	AUCCUUACCCUCCGUAGUCCUU
chr3A:14080005-14080479(-)	365-386	3.5	osa-miR2118f/osa-miR2118j/osa-miR2118m/bdi-miR2118b/	22	UGGGAAUAGGAGGCUUCAGGAA	:.::::: :::::: :::::::	AUCCUUACCCUCCGUAGUCCUU
chr3A:23194240-23195007(+)	677-698	2.5	osa-miR2118f/osa-miR2118j/osa-miR2118m/bdi-miR2118b/	22	GAGGAAUGAGAGGCAUCAGGAG	::::::: ::::::::::::.	AUCCUUACCCUCCGUAGUCCUU
chr3A:27853925-27854569(-)	575-596	3.5	osa-miR2118f/osa-miR2118j/osa-miR2118m/bdi-miR2118b/	22	UAGGAGUUGGAGGCAUCAGAAA	:::::.: ::::::::::: ::	AUCCUUACCCUCCGUAGUCCUU
chr3A:28441608-28442289(-)	593-614	3.5	osa-miR2118f/osa-miR2118j/osa-miR2118m/bdi-miR2118b/	22	UAGGAGUUGGAGUCAUCAGGAA	:::::.: :::: :::::::::	AUCCUUACCCUCCGUAGUCCUU
chr3A:30144670-30145100(+)	362-383	3	osa-miR2118f/osa-miR2118j/osa-miR2118m/bdi-miR2118b/	22	UGGGGAUGGGAGGCUUCAGGAA	:.::.::::::::: :::::::	AUCCUUACCCUCCGUAGUCCUU
chr3A:32878100-32878992(+)	845-866	4	osa-miR2118f/osa-miR2118j/osa-miR2118m/bdi-miR2118b/	22	UAGGAAGAGGAGACAUCAGGAA	:::::: :::: :::::::::	AUCCUUACCCUCCGUAGUCCUU
chr3A:478201-478842(-)	532-553	3	osa-miR2118f/osa-miR2118j/osa-miR2118m/bdi-miR2118b/	22	UCGGCUUGGGAGGCAUCAGGAA	: :: ::::::::::::::::	AUCCUUACCCUCCGUAGUCCUU
chr3A:646288418-646288952(+)	446-467	4	osa-miR2118f/osa-miR2118j/osa-miR2118m/bdi-miR2118b/	22	UAGGAAUAGGAGGCAUUGGGGA	::::::: ::::::::..::.:	AUCCUUACCCUCCGUAGUCCUU
chr3A:646288418-646288952(+)	446-467	4	zma-miR2118f/	22	UAGGAAUAGGAGGCAUUGGGGA	:::: :: :.::::::::::.:	AUCCGUACCUUCCGUAACCCUU
chr3A:654398707-654399453(-)	677-698	4	osa-miR2118f/osa-miR2118j/osa-miR2118m/bdi-miR2118b/	22	UAGGACUGCGAGGUGUCAGGAA	::::: :: ::::..:::::::	AUCCUUACCCUCCGUAGUCCUU
chr3A:692423-693066(-)	553-574	4	osa-miR2118f/osa-miR2118j/osa-miR2118m/bdi-miR2118b/	22	UAGGCCUGGGAGGCAUCAAGAA	:::: :::::::::::: :::	AUCCUUACCCUCCGUAGUCCUU
chr3A:705642494-705643105(+)	501-523	4	zma-miR2118f/	22	UAAGAAUGGAAGGCAUAUGGGAA	:: : ::::::::::: ::::::	AUCCGUACCUUCCGUA-ACCCUU
chr3A:706117639-706118319(+)	591-613	4	osa-miR2118f/osa-miR2118j/osa-miR2118m/bdi-miR2118b/	22	UAGGAAUCGGAGGCAUAUAGGAA	::::::: :::::::: .:::::	AUCCUUACCCUCCGUA-GUCCUU
chr3A:710261365-710262163(-)	708-729	3.5	osa-miR2118f/osa-miR2118j/osa-miR2118m/bdi-miR2118b/	22	UAGGAAUGUGAGACAUCAGGAG	:::::::: ::: ::::::::.	AUCCUUACCCUCCGUAGUCCUU
chr3A:80695584-80696478(+)	785-806	4	zma-miR2118f/	22	UAGGCCUAGGAGGUAUUGGGAA	::::: : :.:::.::::::::	AUCCGUACCUUCCGUAACCCUU
chr3A:886219-886860(-)	551-572	4	osa-miR2118f/osa-miR2118j/osa-miR2118m/bdi-miR2118b/	22	UAGGCUUGGGAGGCAUCAAGAA	:::: :::::::::::: :::	AUCCUUACCCUCCGUAGUCCUU
chr3A:952743-953531(-)	679-700	4	osa-miR2118f/osa-miR2118j/osa-miR2118m/bdi-miR2118b/	22	UAGGCCUGGGAGGCAUCAAGAA	:::: :::::::::::: :::	AUCCUUACCCUCCGUAGUCCUU
chr3B:115506287-115506993(+)	639-660	4	zma-miR2118f/	22	UAGGCCUAGGAGGUAUUGGGAA	::::: : :.:::.::::::::	AUCCGUACCUUCCGUAACCCUU
chr3B:20071799-20072379(-)	472-493	2.5	osa-miR2118f/osa-miR2118j/osa-miR2118m/bdi-miR2118b/	22	GAGGAAUGAGAGGCAUCAGGAG	::::::: ::::::::::::.	AUCCUUACCCUCCGUAGUCCUU
chr3B:34115749-34116236(-)	397-418	4	osa-miR2118f/osa-miR2118j/osa-miR2118m/bdi-miR2118b/	22	UAGGAGUAGGAGGCAUCAGUAG	:::::.: ::::::::::: :.	AUCCUUACCCUCCGUAGUCCUU
chr3B:41153000-41153620(-)	530-551	3.5	osa-miR2118f/osa-miR2118j/osa-miR2118m/bdi-miR2118b/	22	UGGAAUUGGGGGGCAUCAGGAA	:.: : ::::.:::::::::::	AUCCUUACCCUCCGUAGUCCUU
chr3B:41187359-41187978(-)	531-552	4	osa-miR2118f/osa-miR2118j/osa-miR2118m/bdi-miR2118b/	22	UAAGAUUGGGAGGCAACAGGAA	:: :: ::::::::: ::::::	AUCCUUACCCUCCGUAGUCCUU
chr3B:42346092-42346839(+)	657-678	4	osa-miR2118f/osa-miR2118j/osa-miR2118m/bdi-miR2118b/	22	UAGGCUCGGGAGGCAUCGGGAA	:::: ::::::::::.::::	AUCCUUACCCUCCGUAGUCCUU
chr3B:42550625-42551268(+)	553-574	4	osa-miR2118f/osa-miR2118j/osa-miR2118m/bdi-miR2118b/	22	UAGGAAAAGGAGGCAGCAGGAA	:::::: ::::::: ::::::	AUCCUUACCCUCCGUAGUCCUU
chr3B:683783443-683784189(-)	656-677	3	osa-miR2118f/osa-miR2118j/osa-miR2118m/bdi-miR2118b/	22	UAGGACUGCGAGGCGUCAGGAA	::::: :: :::::.:::::::	AUCCUUACCCUCCGUAGUCCUU
chr3B:684051112-684051985(-)	783-804	4	osa-miR2118f/osa-miR2118j/osa-miR2118m/bdi-miR2118b/	22	UAGAAUUAGGAGGCAUCGGGAA	::: : : :::::::::.::::	AUCCUUACCCUCCGUAGUCCUU
chr3B:684064018-684064803(-)	657-678	4	osa-miR2118f/osa-miR2118j/osa-miR2118m/bdi-miR2118b/	22	UAGGAUUGCGAGGCGUCGGGAA	::::: :: :::::.::.::::	AUCCUUACCCUCCGUAGUCCUU
chr3B:684104178-684105109(-)	841-862	4	osa-miR2118f/osa-miR2118j/osa-miR2118m/bdi-miR2118b/	22	UAGGACUGUGAGGCGUCGGGAA	::::: :: :::::.::.::::	AUCCUUACCCUCCGUAGUCCUU
chr3B:758457686-758458138(-)	362-383	4	osa-miR2118f/osa-miR2118j/osa-miR2118m/bdi-miR2118b/	22	UUGGACUAGGAGGCAUCAGGGA	: ::: : ::::::::::::.:	AUCCUUACCCUCCGUAGUCCUU
chr3B:759132995-759133603(-)	518-539	3	zma-miR2118f/	22	UUGGAAUAGAAGGCAUUGGGAA	: :: :: ::::::::::::::	AUCCGUACCUUCCGUAACCCUU
chr3B:760446681-760447362(+)	614-635	4	osa-miR2118f/osa-miR2118j/osa-miR2118m/bdi-miR2118b/	22	UUGGAAUGGGAGGUGUUAGGAA	: :::::::::::..:.:::::	AUCCUUACCCUCCGUAGUCCUU
chr3B:762831487-762832240(+)	664-686	3.5	osa-miR2118f/osa-miR2118j/osa-miR2118m/bdi-miR2118b/	22	UGGGAAUGGGAGGCAUUAAGGAA	:.::::::::::::::.: ::::	AUCCUUACCCUCCGUAGU-CCUU
chr3B:764185717-764186234(+)	448-469	4	osa-miR2118f/osa-miR2118j/osa-miR2118m/bdi-miR2118b/	22	UGGGAAUAGGAGACAUCAGGAG	:.::::: :::: ::::::::.	AUCCUUACCCUCCGUAGUCCUU
chr3B:764426243-764426756(+)	425-446	4	osa-miR2118f/osa-miR2118j/osa-miR2118m/bdi-miR2118b/	22	UGGGAAUAGGAGACAUCAGGAG	:.::::: :::: ::::::::.	AUCCUUACCCUCCGUAGUCCUU
chr3B:773140273-773140769(-)	427-448	2	zma-miR2118f/	22	UAGGCUUGGAAGGCAUUGGGAU	::::: :::::::::::::::	AUCCGUACCUUCCGUAACCCUU
chr3B:777812000-777812474(+)	383-404	3.5	osa-miR2118f/osa-miR2118j/osa-miR2118m/bdi-miR2118b/	22	UAGGAGUAGGAGGCAUGAGGAA	:::::.: :::::::: :::::	AUCCUUACCCUCCGUAGUCCUU
chr3D:13813227-13813910(-)	595-616	3	osa-miR2118f/osa-miR2118j/osa-miR2118m/bdi-miR2118b/	22	GAGGGAUGAGAGGCAUCAGGAG	:::.::: ::::::::::::.	AUCCUUACCCUCCGUAGUCCUU
chr3D:20035192-20035811(-)	519-540	3	osa-miR2118f/osa-miR2118j/osa-miR2118m/bdi-miR2118b/	22	UAGGAAUUGGAGGCAUCAGAAA	::::::: ::::::::::: ::	AUCCUUACCCUCCGUAGUCCUU
chr3D:20320504-20321145(-)	572-593	3	osa-miR2118f/osa-miR2118j/osa-miR2118m/bdi-miR2118b/	22	UAGGAAUUGGAGGCAUCAGAAA	::::::: ::::::::::: ::	AUCCUUACCCUCCGUAGUCCUU
chr3D:20815494-20816114(-)	532-553	3.5	osa-miR2118f/osa-miR2118j/osa-miR2118m/bdi-miR2118b/	22	UAGGAGUUGGAGUCAUCAGGAA	:::::.: :::: :::::::::	AUCCUUACCCUCCGUAGUCCUU
chr3D:20895270-20895995(-)	637-658	3.5	osa-miR2118f/osa-miR2118j/osa-miR2118m/bdi-miR2118b/	22	UAGGAGUUGGAAGCAUCAGGAA	:::::.: ::: ::::::::::	AUCCUUACCCUCCGUAGUCCUU
chr3D:23732801-23733591(+)	700-721	4	osa-miR2118f/osa-miR2118j/osa-miR2118m/bdi-miR2118b/	22	UAGGAAAAGGAGACAUCAGGAA	:::::: :::: :::::::::	AUCCUUACCCUCCGUAGUCCUU
chr3D:24126845-24127516(+)	583-604	3	osa-miR2118f/osa-miR2118j/osa-miR2118m/bdi-miR2118b/	22	UAGGAAAAGGAGGCAUCGGGAA	:::::: :::::::::.::::	AUCCUUACCCUCCGUAGUCCUU
chr3D:24221036-24221657(+)	531-553	4	osa-miR2118f/osa-miR2118j/osa-miR2118m/bdi-miR2118b/	22	CUCGAAUUGGGAGGCAUCAGGAA	:::: :::::::::::::::	AUCCUUA-CCCUCCGUAGUCCUU
chr3D:24614504-24615103(+)	509-530	2.5	osa-miR2118f/osa-miR2118j/osa-miR2118m/bdi-miR2118b/	22	UGGAAUUGGGAGGCAUCAGGAA	:.: : ::::::::::::::::	AUCCUUACCCUCCGUAGUCCUU
chr3D:25109512-25110197(+)	595-616	4	osa-miR2118f/osa-miR2118j/osa-miR2118m/bdi-miR2118b/	22	UAGGAAAAGGAGGCACCAGGAA	:::::: ::::::: ::::::	AUCCUUACCCUCCGUAGUCCUU
chr3D:535552518-535553077(+)	511-532	3.5	osa-miR2118f/osa-miR2118j/osa-miR2118m/bdi-miR2118b/	22	AGGGAAUAUGAGGCAUCAGGAA	.::::: :::::::::::::	AUCCUUACCCUCCGUAGUCCUU
chr3D:573149084-573149641(+)	448-469	4	osa-miR2118f/osa-miR2118j/osa-miR2118m/bdi-miR2118b/	22	UAGGAAUGGGAGGCAUCUUGAA	::::::::::::::::: :::	AUCCUUACCCUCCGUAGUCCUU
chr3D:574522041-574522724(-)	595-616	4	osa-miR2118f/osa-miR2118j/osa-miR2118m/bdi-miR2118b/	22	UGGGAAUAGGAGCCAUCAGGAG	:.::::: :::: ::::::::.	AUCCUUACCCUCCGUAGUCCUU
chr3D:579225445-579226063(-)	530-551	4	zma-miR2118f/	22	UAGGCUUGGAAGACAUUGGGAU	::::: :::::: ::::::::	AUCCGUACCUUCCGUAACCCUU
chr3D:580427003-580427686(-)	593-614	4	osa-miR2118f/osa-miR2118j/osa-miR2118m/bdi-miR2118b/	22	UAGGAAUGGGUGGCAUCAUGAA	:::::::::: ::::::: :::	AUCCUUACCCUCCGUAGUCCUU
chr3D:580906936-580907552(-)	488-509	3.5	osa-miR2118f/osa-miR2118j/osa-miR2118m/bdi-miR2118b/	22	UAGGAGUAGGAGGCAUGAGGAA	:::::.: :::::::: :::::	AUCCUUACCCUCCGUAGUCCUU
chr3D:580998499-580998991(-)	364-385	3.5	osa-miR2118f/osa-miR2118j/osa-miR2118m/bdi-miR2118b/	22	UAGGAGUAGGAGGCAUGAGGAA	:::::.: :::::::: :::::	AUCCUUACCCUCCGUAGUCCUU
chr3D:581076329-581076891(-)	472-493	3.5	osa-miR2118f/osa-miR2118j/osa-miR2118m/bdi-miR2118b/	22	UAGGAGUAGGAGGCAUGAGGAA	:::::.: :::::::: :::::	AUCCUUACCCUCCGUAGUCCUU
chr4A:541884018-541884729(-)	602-623	4	osa-miR2118f/osa-miR2118j/osa-miR2118m/bdi-miR2118b/	22	UAGGAUUGAGAGGAAUCAGGAA	::::: :: :::: ::::::::	AUCCUUACCCUCCGUAGUCCUU
chr4A:597741235-597741834(-)	509-530	4	osa-miR2118f/osa-miR2118j/osa-miR2118m/bdi-miR2118b/	22	UAGAAAUGAGAGGCCUCAGGAA	::: :::: ::::: :::::::	AUCCUUACCCUCCGUAGUCCUU
chr4A:632763207-632763890(+)	593-614	4	osa-miR2118f/osa-miR2118j/osa-miR2118m/bdi-miR2118b/	22	UAGCAAUGGGAGGCACCGGGAA	::: ::::::::::: :.::::	AUCCUUACCCUCCGUAGUCCUU
chr4A:632785446-632786240(+)	677-698	2	osa-miR2118f/osa-miR2118j/osa-miR2118m/bdi-miR2118b/	22	UAGCAAUGGGAGGCAUCGGGAA	::: :::::::::::::.::::	AUCCUUACCCUCCGUAGUCCUU
chr4A:632840389-632840949(+)	470-491	4	osa-miR2118f/osa-miR2118j/osa-miR2118m/bdi-miR2118b/	22	UAGCAAUGGGAGGCAUCGGAAA	::: :::::::::::::.: ::	AUCCUUACCCUCCGUAGUCCUU
chr4A:642555649-642556311(-)	574-595	4	zma-miR2118f/	22	UAGGAAUGCAAGGUGUUGGGAA	:::: ::: ::::..:::::::	AUCCGUACCUUCCGUAACCCUU
chr4A:642598636-642599444(+)	699-720	3.5	osa-miR2118f/osa-miR2118j/osa-miR2118m/bdi-miR2118b/	22	UAGGAAUCGGAGACAUCAGGAG	::::::: :::: ::::::::.	AUCCUUACCCUCCGUAGUCCUU
chr4A:643153440-643153932(-)	404-425	1	zma-miR2118f/	22	UAGGCAUGGAAGGCGUUGGGAA	::::::::::::::.:::::::	AUCCGUACCUUCCGUAACCCUU
chr4A:643953433-643953984(+)	463-484	3	zma-miR2118f/	22	UAGGCAUGGAAGACGUUGGGAA	:::::::::::: :.:::::::	AUCCGUACCUUCCGUAACCCUU
chr4A:645656249-645656892(-)	553-574	3	zma-miR2118f/	22	UAGAAAUGAAAGGCAUUGGGAA	::: ::: :::::::::::::	AUCCGUACCUUCCGUAACCCUU
chr4A:648590107-648590663(-)	489-510	3	osa-miR2118f/osa-miR2118j/osa-miR2118m/bdi-miR2118b/	22	UAGGAAUAGGAGGCAGCAGGAA	::::::: ::::::: ::::::	AUCCUUACCCUCCGUAGUCCUU
chr4A:666505382-666505934(-)	443-464	4	osa-miR2118f/osa-miR2118j/osa-miR2118m/bdi-miR2118b/	22	UAGGCCUGAGAGGCAUCAGGGA	:::: :: :::::::::::.:	AUCCUUACCCUCCGUAGUCCUU
chr4A:686636623-686637306(-)	593-614	4	osa-miR2118f/osa-miR2118j/osa-miR2118m/bdi-miR2118b/	22	UGGGAAUUGGAGGCAUCAGAAG	:.::::: ::::::::::: :.	AUCCUUACCCUCCGUAGUCCUU
chr4A:686927123-686927535(-)	322-343	4	osa-miR2118f/osa-miR2118j/osa-miR2118m/bdi-miR2118b/	22	UAGGAUUAGGAGGCAUUGGGAA	::::: : ::::::::..::::	AUCCUUACCCUCCGUAGUCCUU
chr4A:686927123-686927535(-)	322-343	4	zma-miR2118f/	22	UAGGAUUAGGAGGCAUUGGGAA	:::: : :.::::::::::::	AUCCGUACCUUCCGUAACCCUU
chr4A:687051910-687052612(-)	614-635	3.5	zma-miR2118f/	22	UGGGCAUUGGAGGUAUUGGGAA	:.::::: :.:::.::::::::	AUCCGUACCUUCCGUAACCCUU
chr4A:688964727-688965366(-)	551-572	3	osa-miR2118f/osa-miR2118j/osa-miR2118m/bdi-miR2118b/	22	UGGGAACCGGAGGCAUCAGGAG	:.:::: :::::::::::::.	AUCCUUACCCUCCGUAGUCCUU
chr4A:694944767-694945452(-)	595-616	3	osa-miR2118f/osa-miR2118j/osa-miR2118m/bdi-miR2118b/	22	UAGGAAUUAGAGGCAUCAGGAC	::::::: ::::::::::::	AUCCUUACCCUCCGUAGUCCUU
chr4A:698090756-698091376(-)	511-532	3	osa-miR2118f/osa-miR2118j/osa-miR2118m/bdi-miR2118b/	22	UAUGACUGGGAGGCAUCGGGAA	:: :: :::::::::::.::::	AUCCUUACCCUCCGUAGUCCUU
chr4A:718481962-718482454(-)	426-446	4	osa-miR2118f/osa-miR2118j/osa-miR2118m/bdi-miR2118b/	22	UAUGAAUGGGAGGCA-CAGGGA	:: :::::::::::: ::::.:	AUCCUUACCCUCCGUAGUCCUU
chr4A:723798928-723799560(-)	542-563	2.5	osa-miR2118f/osa-miR2118j/osa-miR2118m/bdi-miR2118b/	22	UGAGAAUAGGAGGCAUCAGGAA	:. :::: ::::::::::::::	AUCCUUACCCUCCGUAGUCCUU
chr4B:10452475-10453139(+)	574-595	4	osa-miR2118f/osa-miR2118j/osa-miR2118m/bdi-miR2118b/	22	UAGAAAUGCGAGGCUUCAGGAA	::: :::: ::::: :::::::	AUCCUUACCCUCCGUAGUCCUU
chr4B:22904940-22905583(-)	553-575	3.5	osa-miR2118f/osa-miR2118j/osa-miR2118m/bdi-miR2118b/	22	UGGGCAUGGGAGGCAUCCAGGAA	:.:: :::::::::::: :::::	AUCCUUACCCUCCGUAG-UCCUU
chr4B:22906597-22907323(-)	638-659	4	zma-miR2118f/	22	UAAGCAUGGGAGGCAUAGGGAA	:: ::::::.:::::: :::::	AUCCGUACCUUCCGUAACCCUU
chr4B:35210441-35211187(-)	656-677	3.5	osa-miR2118f/osa-miR2118j/osa-miR2118m/bdi-miR2118b/	22	UGGGCAUGAGAGGCAUUAGGAA	:.:: ::: :::::::.:::::	AUCCUUACCCUCCGUAGUCCUU
chr4B:3583746-3584618(+)	165-186	4	osa-miR2118f/osa-miR2118j/osa-miR2118m/bdi-miR2118b/	22	UACGAAUGUGAGGCAUUGGGAA	:: ::::: :::::::..::::	AUCCUUACCCUCCGUAGUCCUU
chr4B:3583746-3584618(+)	165-186	4	zma-miR2118f/	22	UACGAAUGUGAGGCAUUGGGAA	:: : ::: .::::::::::::	AUCCGUACCUUCCGUAACCCUU
chr4D:12550357-12551170(-)	722-743	3.5	osa-miR2118f/osa-miR2118j/osa-miR2118m/bdi-miR2118b/	22	UAAGCAUGGGAGGCAUCGGGAG	:: : ::::::::::::.:::.	AUCCUUACCCUCCGUAGUCCUU
chr5A:11528072-11528587(-)	448-469	3	zma-miR2118f/	22	UAGGCAUAGAAGGCAUCGGGAA	::::::: :::::::: :::::	AUCCGUACCUUCCGUAACCCUU
chr5A:398983704-398984199(-)	404-425	4	osa-miR2118f/osa-miR2118j/osa-miR2118m/bdi-miR2118b/	22	UAGGAUUGGGAGGCAUGGGGAA	::::: :::::::::: .::::	AUCCUUACCCUCCGUAGUCCUU
chr5A:554752513-554753029(+)	427-449	4	osa-miR2118f/osa-miR2118j/osa-miR2118m/bdi-miR2118b/	22	UAGGCAUGGAAGGCAUACAGGAA	:::: :::: :::::: ::::::	AUCCUUACCCUCCGUA-GUCCUU
chr5A:554852452-554853154(+)	592-614	4	osa-miR2118f/osa-miR2118j/osa-miR2118m/bdi-miR2118b/	22	UAGGCAUUGGAGGCAUACAGGAA	:::: :: :::::::: ::::::	AUCCUUACCCUCCGUA-GUCCUU
chr5A:559089641-559090199(-)	470-491	3	osa-miR2118f/osa-miR2118j/osa-miR2118m/bdi-miR2118b/	22	UAGGACUGGGAGGCACCAGGAA	::::: ::::::::: ::::::	AUCCUUACCCUCCGUAGUCCUU
chr5A:567702033-567702529(+)	406-427	4	osa-miR2118f/osa-miR2118j/osa-miR2118m/bdi-miR2118b/	22	UAUGAAUGAGAUGCAUCAGGAA	:: ::::: :: ::::::::::	AUCCUUACCCUCCGUAGUCCUU
chr5A:601151344-601152294(+)	859-880	3.5	osa-miR2118f/osa-miR2118j/osa-miR2118m/bdi-miR2118b/	22	UAGGAAUGGGAGGCAACGGGAG	::::::::::::::: :.:::.	AUCCUUACCCUCCGUAGUCCUU
chr5A:601196260-601196984(+)	635-656	3.5	osa-miR2118f/osa-miR2118j/osa-miR2118m/bdi-miR2118b/	22	UAAGAAUGGUAGGCAUCAGGAG	:: :::::: :::::::::::.	AUCCUUACCCUCCGUAGUCCUU
chr5A:601750444-601751150(+)	616-637	3.5	osa-miR2118f/osa-miR2118j/osa-miR2118m/bdi-miR2118b/	22	UGGGAAUGAGUGGCAUCAGGAA	:.:::::: : :::::::::::	AUCCUUACCCUCCGUAGUCCUU
chr5A:631705505-631706249(+)	677-698	3.5	zma-miR2118f/	22	UGGGCAUGGGAGGCAUGGGGAA	:.:::::::.:::::: :::::	AUCCGUACCUUCCGUAACCCUU
chr5B:13698453-13699096(-)	553-574	4	osa-miR2118f/osa-miR2118j/osa-miR2118m/bdi-miR2118b/	22	UAGGCAUAGGAGGCACCAGGAA	:::: :: ::::::: ::::::	AUCCUUACCCUCCGUAGUCCUU
chr5B:13814598-13815389(-)	701-722	3.5	osa-miR2118f/osa-miR2118j/osa-miR2118m/bdi-miR2118b/	22	UGAGCAUGAGAGGCAUCAGGAA	:. : ::: :::::::::::::	AUCCUUACCCUCCGUAGUCCUU
chr5B:14945045-14945729(-)	615-636	4	osa-miR2118f/osa-miR2118j/osa-miR2118m/bdi-miR2118b/	22	UAGGAAGGUGAGGUGUCAGGAA	:::::: : ::::..:::::::	AUCCUUACCCUCCGUAGUCCUU
chr5B:16050381-16051001(-)	551-572	4	zma-miR2118f/	22	UAGGCUUGGAAGGUAUUAGGAA	::::: :::::::.::: ::::	AUCCGUACCUUCCGUAACCCUU
chr5B:16414135-16414711(-)	488-509	3	zma-miR2118f/	22	UGGGUAUGGAAGGCAUUCGGAA	:.::.:::::::::::: ::::	AUCCGUACCUUCCGUAACCCUU
chr5B:533991030-533991998(+)	739-761	4	osa-miR2118f/osa-miR2118j/osa-miR2118m/bdi-miR2118b/	22	UAGGCAUUGGAGGCAUACAGGAA	:::: :: :::::::: ::::::	AUCCUUACCCUCCGUA-GUCCUU
chr5B:539303121-539303675(-)	464-485	1.5	osa-miR2118f/osa-miR2118j/osa-miR2118m/bdi-miR2118b/	22	UAGGGCUGGGAGGCAUCAGGAA	::::. ::::::::::::::::	AUCCUUACCCUCCGUAGUCCUU
chr5B:547141458-547142097(+)	593-614	4	osa-miR2118f/osa-miR2118j/osa-miR2118m/bdi-miR2118b/	22	UCGGAAUAGGAGGCAUUGGGAA	: ::::: ::::::::..::::	AUCCUUACCCUCCGUAGUCCUU
chr5B:547141458-547142097(+)	593-614	4	zma-miR2118f/	22	UCGGAAUAGGAGGCAUUGGGAA	: :: :: :.::::::::::::	AUCCGUACCUUCCGUAACCCUU
chr5B:547551694-547552235(+)	451-472	4	osa-miR2118f/osa-miR2118j/osa-miR2118m/bdi-miR2118b/	22	UAGGAAUGUGAGGUAUUGGGAA	:::::::: ::::.::..::::	AUCCUUACCCUCCGUAGUCCUU
chr5B:547551694-547552235(+)	451-472	4	zma-miR2118f/	22	UAGGAAUGUGAGGUAUUGGGAA	:::: ::: .:::.::::::::	AUCCGUACCUUCCGUAACCCUU
chr5B:548469516-548470222(+)	679-700	4	osa-miR2118f/osa-miR2118j/osa-miR2118m/bdi-miR2118b/	22	UAUGAAUGGGACGCAUCAGGGA	:: :::::::: ::::::::.:	AUCCUUACCCUCCGUAGUCCUU
chr5B:599841579-599842055(-)	386-407	4	zma-miR2118f/	22	UGAGGAUGGAAGGCGUUGGGAG	:. : :::::::::.::::::.	AUCCGUACCUUCCGUAACCCUU
chr5B:611687678-611688445(-)	658-679	4	osa-miR2118f/osa-miR2118j/osa-miR2118m/bdi-miR2118b/	22	UGAGAAUGGAAGGCAUCAGGAG	:. :::::: :::::::::::.	AUCCUUACCCUCCGUAGUCCUU
chr5B:634447608-634448335(-)	637-658	2	zma-miR2118f/	22	UAGGCCUGGAAGGUAUUGGGAA	::::: :::::::.::::::::	AUCCGUACCUUCCGUAACCCUU
chr5B:643939867-643940590(+)	656-677	4	osa-miR2118f/osa-miR2118j/osa-miR2118m/bdi-miR2118b/	22	UAGGAAGAGGAGGCAUCUGGAA	:::::: ::::::::: ::::	AUCCUUACCCUCCGUAGUCCUU
chr5B:672165192-672165792(-)	510-531	2.5	osa-miR2118f/osa-miR2118j/osa-miR2118m/bdi-miR2118b/	22	UAGGUGUGCGAGGCAUCAGGAA	:::: .:: :::::::::::::	AUCCUUACCCUCCGUAGUCCUU
chr5B:674495940-674496447(+)	417-438	3.5	osa-miR2118f/osa-miR2118j/osa-miR2118m/bdi-miR2118b/	22	UAGGCGUGUGAGGCAUCAGGAU	:::: .:: ::::::::::::	AUCCUUACCCUCCGUAGUCCUU
chr5B:677920996-677921889(-)	803-824	4	osa-miR2118f/osa-miR2118j/osa-miR2118m/bdi-miR2118b/	22	UAGCAAUGGGAGGCACCGGGAA	::: ::::::::::: :.::::	AUCCUUACCCUCCGUAGUCCUU
chr5B:678023033-678023735(-)	635-656	4	osa-miR2118f/osa-miR2118j/osa-miR2118m/bdi-miR2118b/	22	UAGCAAUGGGAGGCACCAGGAU	::: ::::::::::: :::::	AUCCUUACCCUCCGUAGUCCUU
chr5B:704980722-704981319(+)	488-509	3	zma-miR2118f/	22	UAGGCAUUGAAGGCAUUAGGAA	::::::: ::::::::: ::::	AUCCGUACCUUCCGUAACCCUU
chr5D:268534055-268534658(+)	513-534	3.5	osa-miR2118f/osa-miR2118j/osa-miR2118m/bdi-miR2118b/	22	UGGGAAUAGGAGGCAUUGGGAA	:.::::: ::::::::..::::	AUCCUUACCCUCCGUAGUCCUU
chr5D:268534055-268534658(+)	513-534	3.5	zma-miR2118f/	22	UGGGAAUAGGAGGCAUUGGGAA	:.:: :: :.::::::::::::	AUCCGUACCUUCCGUAACCCUU
chr5D:432065748-432066389(+)	553-574	4	osa-miR2118f/osa-miR2118j/osa-miR2118m/bdi-miR2118b/	22	UAGGAUCGGGAGGCAACAGGAA	::::: :::::::: ::::::	AUCCUUACCCUCCGUAGUCCUU
chr5D:434563979-434564705(+)	657-678	3.5	osa-miR2118f/osa-miR2118j/osa-miR2118m/bdi-miR2118b/	22	UGGGAAUGUGAGGCAACAGGAA	:.:::::: :::::: ::::::	AUCCUUACCCUCCGUAGUCCUU
chr5D:438834302-438835134(+)	741-763	4	osa-miR2118f/osa-miR2118j/osa-miR2118m/bdi-miR2118b/	22	UAGGCAUUGGAGGCAUACAGGAA	:::: :: :::::::: ::::::	AUCCUUACCCUCCGUA-GUCCUU
chr5D:439490432-439491098(+)	599-620	3.5	osa-miR2118f/osa-miR2118j/osa-miR2118m/bdi-miR2118b/	22	AAGGAGUUGGAGGCAUCAGGAC	::::.: :::::::::::::	AUCCUUACCCUCCGUAGUCCUU
chr5D:439554726-439555591(+)	775-796	4	osa-miR2118f/osa-miR2118j/osa-miR2118m/bdi-miR2118b/	22	UAUGAAUGAGAGGCAUCAGAAA	:: ::::: :::::::::: ::	AUCCUUACCCUCCGUAGUCCUU
chr5D:443016485-443017017(-)	444-465	1.5	osa-miR2118f/osa-miR2118j/osa-miR2118m/bdi-miR2118b/	22	UAGGGCUGGGAGGCAUCAGGAA	::::. ::::::::::::::::	AUCCUUACCCUCCGUAGUCCUU
chr5D:44427270-44427766(+)	406-427	4	osa-miR2118f/osa-miR2118j/osa-miR2118m/bdi-miR2118b/	22	UAGAAAUGGGAGUCGUCAGGAA	::: :::::::: :.:::::::	AUCCUUACCCUCCGUAGUCCUU
chr5D:44617182-44617886(-)	595-616	4	zma-miR2118f/	22	UAAGCAUGGAAGGCAUCGGGGA	:: ::::::::::::: :::.:	AUCCGUACCUUCCGUAACCCUU
chr5D:446768733-446769456(-)	614-635	4	osa-miR2118f/osa-miR2118j/osa-miR2118m/bdi-miR2118b/	22	UAGGCCUGAGAGGCAUCGGGAA	:::: :: ::::::::.::::	AUCCUUACCCUCCGUAGUCCUU
chr5D:447977748-447978830(+)	992-1013	4	osa-miR2118f/osa-miR2118j/osa-miR2118m/bdi-miR2118b/	22	UCGGAAUAGGAGGCAUUGGGAA	: ::::: ::::::::..::::	AUCCUUACCCUCCGUAGUCCUU
chr5D:447977748-447978830(+)	992-1013	4	zma-miR2118f/	22	UCGGAAUAGGAGGCAUUGGGAA	: :: :: :.::::::::::::	AUCCGUACCUUCCGUAACCCUU
chr5D:447985731-447986561(+)	742-763	3	osa-miR2118f/osa-miR2118j/osa-miR2118m/bdi-miR2118b/	22	UCGGAAUAGGAGGCAUUAGGAA	: ::::: ::::::::.:::::	AUCCUUACCCUCCGUAGUCCUU
chr5D:451688049-451688816(-)	677-698	2	osa-miR2118f/osa-miR2118j/osa-miR2118m/bdi-miR2118b/	22	UAGGAAGGAGAGGCAUCAGGAA	:::::: : :::::::::::::	AUCCUUACCCUCCGUAGUCCUU
chr5D:482416909-482417448(+)	449-470	3.5	osa-miR2118f/osa-miR2118j/osa-miR2118m/bdi-miR2118b/	22	UGGGAAUGAGUGGCAUCAGGAA	:.:::::: : :::::::::::	AUCCUUACCCUCCGUAGUCCUU
chr5D:482762019-482762786(-)	677-698	3.5	osa-miR2118f/osa-miR2118j/osa-miR2118m/bdi-miR2118b/	22	UGGCAAUGGGAGGUGUCAGGAA	:.: :::::::::..:::::::	AUCCUUACCCUCCGUAGUCCUU
chr5D:487343091-487343627(-)	446-467	3.5	zma-miR2118f/	22	UGAGGAUGGAAGGCGUUGGGAA	:. : :::::::::.:::::::	AUCCGUACCUUCCGUAACCCUU
chr5D:495789266-495789825(+)	469-490	3.5	osa-miR2118f/osa-miR2118j/osa-miR2118m/bdi-miR2118b/	22	UAGGAGUGAGAUGCAUCAGGAA	:::::.:: :: ::::::::::	AUCCUUACCCUCCGUAGUCCUU
chr5D:500972830-500973537(-)	616-638	4	osa-miR2118f/osa-miR2118j/osa-miR2118m/bdi-miR2118b/	22	UAAGAAUAGGAGGCAUCAUGGAA	:: :::: :::::::::: ::::	AUCCUUACCCUCCGUAGU-CCUU
chr5D:503877178-503878122(+)	835-856	4	zma-miR2118f/	22	UGGGCGUGGGAGGCAUGGGGAA	:.:::.:::.:::::: :::::	AUCCGUACCUUCCGUAACCCUU
chr5D:503882088-503882796(+)	620-641	3.5	zma-miR2118f/	22	UGGGCAUGGGAGGCAUGGGGAA	:.:::::::.:::::: :::::	AUCCGUACCUUCCGUAACCCUU
chr5D:504037909-504038508(+)	553-574	4	osa-miR2118f/osa-miR2118j/osa-miR2118m/bdi-miR2118b/	22	UGAGCGUGGGAGGCAUCGGGAA	:. : .:::::::::::.::::	AUCCUUACCCUCCGUAGUCCUU
chr5D:504193153-504193878(+)	616-637	4	zma-miR2118f/	22	UGGGCGUGGGAGGCAUGGGGAA	:.:::.:::.:::::: :::::	AUCCGUACCUUCCGUAACCCUU
chr6A:17706192-17706896(-)	595-616	4	osa-miR2118f/osa-miR2118j/osa-miR2118m/bdi-miR2118b/	22	UAAGCAUGGGAGGUGUCAGGAA	:: : ::::::::..:::::::	AUCCUUACCCUCCGUAGUCCUU
chr6A:24240317-24240857(+)	470-491	3	osa-miR2118f/osa-miR2118j/osa-miR2118m/bdi-miR2118b/	22	UGGGAGUAGGAGGCGUCAGGAA	:.:::.: ::::::.:::::::	AUCCUUACCCUCCGUAGUCCUU
chr6A:53849104-53849740(-)	548-569	4	zma-miR2118f/	22	UAGGCUUAGAAGGCAUAGGGAA	::::: : :::::::: :::::	AUCCGUACCUUCCGUAACCCUU
chr6A:558959710-558960376(-)	557-578	4	zma-miR2118f/	22	UAGGCAUGAGAGGCAUGGGGAA	:::::::: .:::::: :::::	AUCCGUACCUUCCGUAACCCUU
chr6A:588597241-588597903(-)	574-595	2.5	zma-miR2118f/	22	UGGGCAUGGAAGGCAUUAGGAA	:.::::::::::::::: ::::	AUCCGUACCUUCCGUAACCCUU
chr6A:97091809-97092431(+)	532-553	4	osa-miR2118f/osa-miR2118j/osa-miR2118m/bdi-miR2118b/	22	UAGGAUUGGGAGACAUUAGGAA	::::: :::::: :::.:::::	AUCCUUACCCUCCGUAGUCCUU
chr6B:100298575-100299113(-)	448-469	3	zma-miR2118f/	22	UCGGCUUGGGAGGCAUUGGGAA	: ::: :::.::::::::::::	AUCCGUACCUUCCGUAACCCUU
chr6B:102066838-102067335(+)	469-490	4	osa-miR2118f/osa-miR2118j/osa-miR2118m/bdi-miR2118b/	22	UAGGCAUAGGAGGCACCAGGAA	:::: :: ::::::: ::::::	AUCCUUACCCUCCGUAGUCCUU
chr6B:102259081-102259701(+)	511-532	4	zma-miR2118f/	22	UAGGCUUAGAAGGCAUAGGGAA	::::: : :::::::: :::::	AUCCGUACCUUCCGUAACCCUU
chr6B:124992042-124992725(-)	593-614	2	osa-miR2118f/osa-miR2118j/osa-miR2118m/bdi-miR2118b/	22	UAGGAAUAGGAGGCAUCAGGAU	::::::: :::::::::::::	AUCCUUACCCUCCGUAGUCCUU
chr6B:125341631-125342421(-)	700-721	4	osa-miR2118f/osa-miR2118j/osa-miR2118m/bdi-miR2118b/	22	UAGGAAUAGGAGCCAUCAGGAU	::::::: :::: ::::::::	AUCCUUACCCUCCGUAGUCCUU
chr6B:13822715-13823442(-)	637-658	4	osa-miR2118f/osa-miR2118j/osa-miR2118m/bdi-miR2118b/	22	UAGGAUUGAGAGGCAUCCGGAA	::::: :: :::::::: ::::	AUCCUUACCCUCCGUAGUCCUU
chr6B:143745967-143746586(+)	530-552	4	osa-miR2118f/osa-miR2118j/osa-miR2118m/bdi-miR2118b/	22	UAUGAAUGGAAGGCACUCAGGAA	:: :::::: ::::: :::::::	AUCCUUACCCUCCGU-AGUCCUU
chr6B:154833141-154834043(+)	740-761	4	osa-miR2118f/osa-miR2118j/osa-miR2118m/bdi-miR2118b/	22	UAGGAAUCGGAGACAUUAGGAA	::::::: :::: :::.:::::	AUCCUUACCCUCCGUAGUCCUU
chr6B:155196046-155196802(+)	666-687	4	osa-miR2118f/osa-miR2118j/osa-miR2118m/bdi-miR2118b/	22	UAGGAAUUGGAGACAUUAGGAA	::::::: :::: :::.:::::	AUCCUUACCCUCCGUAGUCCUU
chr6B:155198869-155199344(+)	385-406	3	osa-miR2118f/osa-miR2118j/osa-miR2118m/bdi-miR2118b/	22	UAGGAUUUGGAGGCAUUAGGAA	::::: : ::::::::.:::::	AUCCUUACCCUCCGUAGUCCUU
chr6B:155332721-155333404(+)	593-614	3	osa-miR2118f/osa-miR2118j/osa-miR2118m/bdi-miR2118b/	22	UUGGAAUAGGAGGCAUUAGGAA	: ::::: ::::::::.:::::	AUCCUUACCCUCCGUAGUCCUU
chr6B:30069958-30070578(-)	530-551	4	osa-miR2118f/osa-miR2118j/osa-miR2118m/bdi-miR2118b/	22	UAAGCAUGGGAGGUGUCAGGAA	:: : ::::::::..:::::::	AUCCUUACCCUCCGUAGUCCUU
chr6B:42739126-42739668(-)	473-494	2.5	osa-miR2118f/osa-miR2118j/osa-miR2118m/bdi-miR2118b/	22	UGAGAAUAGGAGGCAUCAGGAA	:. :::: ::::::::::::::	AUCCUUACCCUCCGUAGUCCUU
chr6B:623338670-623339564(-)	784-805	2.5	osa-miR2118f/osa-miR2118j/osa-miR2118m/bdi-miR2118b/	22	UAGGGAUGAGAGGUAUCAGGAA	::::.::: ::::.::::::::	AUCCUUACCCUCCGUAGUCCUU
chr6B:623441573-623442235(-)	553-574	4	osa-miR2118f/osa-miR2118j/osa-miR2118m/bdi-miR2118b/	22	UAGGCAUGAGAGGCAUGAGGAA	:::: ::: ::::::: :::::	AUCCUUACCCUCCGUAGUCCUU
chr6B:648044706-648045473(-)	719-740	4	osa-miR2118f/osa-miR2118j/osa-miR2118m/bdi-miR2118b/	22	UAGGAGUUGGAAGCAUCAGGAG	:::::.: ::: :::::::::.	AUCCUUACCCUCCGUAGUCCUU
chr6B:665671031-665671775(-)	635-656	4	osa-miR2118f/osa-miR2118j/osa-miR2118m/bdi-miR2118b/	22	UAGGCAUAGAAGGCAUCAGGAA	:::: :: : ::::::::::::	AUCCUUACCCUCCGUAGUCCUU
chr6B:715178013-715178718(-)	617-638	4	osa-miR2118f/osa-miR2118j/osa-miR2118m/bdi-miR2118b/	22	UAGCUUUGGGAGGCAUUAGGAA	::: ::::::::::.:::::	AUCCUUACCCUCCGUAGUCCUU
chr6B:716677857-716678849(-)	422-443	3.5	osa-miR2118f/osa-miR2118j/osa-miR2118m/bdi-miR2118b/	22	AGGGAACGGGAGGCAUCGGGAA	.:::: ::::::::::.::::	AUCCUUACCCUCCGUAGUCCUU
chr6D:17132618-17133402(-)	611-632	4	osa-miR2118f/osa-miR2118j/osa-miR2118m/bdi-miR2118b/	22	UAAGCAUGGGAGGUGUCAGGAA	:: : ::::::::..:::::::	AUCCUUACCCUCCGUAGUCCUU
chr6D:440505307-440505803(-)	406-427	4	zma-miR2118f/	22	UAGGCAUGGAAGGCACUAGGAA	::::::::::::::: : ::::	AUCCGUACCUUCCGUAACCCUU
chr6D:461698762-461699549(-)	699-720	3	zma-miR2118f/	22	UAGGCAUAGAAGGCAUUGGAAA	::::::: ::::::::::: ::	AUCCGUACCUUCCGUAACCCUU
chr6D:468951213-468951796(-)	493-514	3	osa-miR2118f/osa-miR2118j/osa-miR2118m/bdi-miR2118b/	22	UAGGUUUGGGAGGCAUUAGGAA	:::: ::::::::::.:::::	AUCCUUACCCUCCGUAGUCCUU
chr6D:468992548-468993252(-)	614-635	4	osa-miR2118f/osa-miR2118j/osa-miR2118m/bdi-miR2118b/	22	UAGGCAUAGAAGGCAUCAGGAA	:::: :: : ::::::::::::	AUCCUUACCCUCCGUAGUCCUU
chr6D:46910014-46910720(+)	616-637	2	osa-miR2118f/osa-miR2118j/osa-miR2118m/bdi-miR2118b/	22	UAGGAAUAGGAGGCAUCAGGAC	::::::: :::::::::::::	AUCCUUACCCUCCGUAGUCCUU
chr6D:55077096-55078052(-)	887-908	3	osa-miR2118f/osa-miR2118j/osa-miR2118m/bdi-miR2118b/	22	UAGGAAUAGGAGCCAUCAGGAA	::::::: :::: :::::::::	AUCCUUACCCUCCGUAGUCCUU
chr6D:55313764-55314429(-)	575-596	3	osa-miR2118f/osa-miR2118j/osa-miR2118m/bdi-miR2118b/	22	UAGGAAUAGGAGACAUCAGGAA	::::::: :::: :::::::::	AUCCUUACCCUCCGUAGUCCUU
chr6D:68841430-68842021(+)	500-522	4	osa-miR2118f/osa-miR2118j/osa-miR2118m/bdi-miR2118b/	22	UAUGAAUGGAAGGCAUUCAGGAA	:: :::::: :::::: ::::::	AUCCUUACCCUCCGUA-GUCCUU
chr6D:80599152-80599751(+)	509-530	4	osa-miR2118f/osa-miR2118j/osa-miR2118m/bdi-miR2118b/	22	UAGGAUUGGGAGACAUUAGGAA	::::: :::::: :::.:::::	AUCCUUACCCUCCGUAGUCCUU
chr6D:80605905-80606612(+)	617-638	3	osa-miR2118f/osa-miR2118j/osa-miR2118m/bdi-miR2118b/	22	UAGGAUUCAGAGGCAUCAGGAA	::::: : :::::::::::::	AUCCUUACCCUCCGUAGUCCUU
chr6D:81110163-81110806(+)	553-574	3	osa-miR2118f/osa-miR2118j/osa-miR2118m/bdi-miR2118b/	22	UAGGAUUUGGAGGCAUUAGGAA	::::: : ::::::::.:::::	AUCCUUACCCUCCGUAGUCCUU
chr6D:81120470-81121029(+)	469-490	4	osa-miR2118f/osa-miR2118j/osa-miR2118m/bdi-miR2118b/	22	UAGGAUUUGGAGGCAUUAGGGA	::::: : ::::::::.:::.:	AUCCUUACCCUCCGUAGUCCUU
chr6D:81171628-81172506(+)	790-811	3	osa-miR2118f/osa-miR2118j/osa-miR2118m/bdi-miR2118b/	22	UUGGAAUUGGAGGCAUUAGGAA	: ::::: ::::::::.:::::	AUCCUUACCCUCCGUAGUCCUU
chr6D:81212090-81212935(+)	818-839	3	osa-miR2118f/osa-miR2118j/osa-miR2118m/bdi-miR2118b/	22	UUGGAAUUGGAGGCAUUAGGAA	: ::::: ::::::::.:::::	AUCCUUACCCUCCGUAGUCCUU
chr7A:112338052-112339027(+)	865-887	3	osa-miR2118f/osa-miR2118j/osa-miR2118m/bdi-miR2118b/	22	UAGGCAUGGGAGGCAUCAGAGAA	:::: :::::::::::::: :::	AUCCUUACCCUCCGUAGUC-CUU
chr7A:112355390-112356302(+)	823-845	3	osa-miR2118f/osa-miR2118j/osa-miR2118m/bdi-miR2118b/	22	UAGGAAUGGGAGGCAUCGGAGAA	:::::::::::::::::.: :::	AUCCUUACCCUCCGUAGUC-CUU
chr7A:112690368-112691076(+)	638-660	2.5	zma-miR2118f/	22	UAGGCAUGGGAGGCAUUGGAGAA	:::::::::.::::::::: :::	AUCCGUACCUUCCGUAACC-CUU
chr7A:138152858-138153593(-)	647-668	4	zma-miR2118f/	22	UAGGAUUGAAAGGCGUUGGGAA	:::: :: :::::.:::::::	AUCCGUACCUUCCGUAACCCUU
chr7A:15125325-15126029(+)	616-637	4	osa-miR2118f/osa-miR2118j/osa-miR2118m/bdi-miR2118b/	22	UAUGAUUAGGAGGCAUCGGGAA	:: :: : :::::::::.::::	AUCCUUACCCUCCGUAGUCCUU
chr7A:175903476-175904012(+)	469-490	3.5	osa-miR2118f/osa-miR2118j/osa-miR2118m/bdi-miR2118b/	22	UAGGGAUGAGAGGCAUCCGGAA	::::.::: :::::::: ::::	AUCCUUACCCUCCGUAGUCCUU
chr7A:36930359-36930958(+)	511-532	4	osa-miR2118f/osa-miR2118j/osa-miR2118m/bdi-miR2118b/	22	UAGGCUUGGAAGGCAUCAGGAA	:::: ::: ::::::::::::	AUCCUUACCCUCCGUAGUCCUU
chr7A:38709166-38709977(+)	742-763	3.5	zma-miR2118f/	22	UGGAGAUGGAAGGUAUUGGGAA	:.: ::::::::.::::::::	AUCCGUACCUUCCGUAACCCUU
chr7A:38938827-38939487(+)	551-572	2.5	zma-miR2118f/	22	UGGAAAUGGAAGGCAUUGGGAA	:.: :::::::::::::::::	AUCCGUACCUUCCGUAACCCUU
chr7A:39307775-39308397(-)	532-553	4	zma-miR2118f/	22	UAGAAAUGGAAGACAUUGGGAA	::: ::::::: :::::::::	AUCCGUACCUUCCGUAACCCUU
chr7A:42812696-42813400(+)	637-659	4	osa-miR2118f/osa-miR2118j/osa-miR2118m/bdi-miR2118b/	22	UAUGGAAUAAGAGGCAUCGGGAA	:: ::::: ::::::::.::::	AU-CCUUACCCUCCGUAGUCCUU
chr7A:54931537-54932113(+)	467-488	3	zma-miR2118f/	22	UAGGCUUGGGAGGCAUUGGGGA	::::: :::.::::::::::.:	AUCCGUACCUUCCGUAACCCUU
chr7A:581946408-581947051(+)	553-574	4	osa-miR2118f/osa-miR2118j/osa-miR2118m/bdi-miR2118b/	22	UAGGAAAAGGAGGCAUCUGGAA	:::::: ::::::::: ::::	AUCCUUACCCUCCGUAGUCCUU
chr7A:647303083-647303684(-)	511-532	4	osa-miR2118f/osa-miR2118j/osa-miR2118m/bdi-miR2118b/	22	UAGGCAUGAGAGGUAUUAGGAA	:::: ::: ::::.::.:::::	AUCCUUACCCUCCGUAGUCCUU
chr7A:652534050-652534734(-)	636-657	4	osa-miR2118f/osa-miR2118j/osa-miR2118m/bdi-miR2118b/	22	UUGGAAGGGGAGGUAUCAGGAU	: :::: ::::::.:::::::	AUCCUUACCCUCCGUAGUCCUU
chr7A:690071495-690072202(-)	616-637	3	osa-miR2118f/osa-miR2118j/osa-miR2118m/bdi-miR2118b/	22	UAGAUAUGGGAGGCAUUAGGAA	::: :::::::::::.:::::	AUCCUUACCCUCCGUAGUCCUU
chr7B:11084292-11085082(+)	702-723	4	osa-miR2118f/osa-miR2118j/osa-miR2118m/bdi-miR2118b/	22	UGAGAGUAGGAGGCAUCGGGAA	:. ::.: :::::::::.::::	AUCCUUACCCUCCGUAGUCCUU
chr7B:138661193-138661750(+)	469-490	4	osa-miR2118f/osa-miR2118j/osa-miR2118m/bdi-miR2118b/	22	UAGGACUAGGAGGCAUCAAGAA	::::: : :::::::::: :::	AUCCUUACCCUCCGUAGUCCUU
chr7B:138718112-138718762(+)	581-602	3.5	osa-miR2118f/osa-miR2118j/osa-miR2118m/bdi-miR2118b/	22	UAGGGCUGAGAGGCAUCGGGAA	::::. :: ::::::::.::::	AUCCUUACCCUCCGUAGUCCUU
chr7B:155896542-155897141(-)	511-532	4	osa-miR2118f/osa-miR2118j/osa-miR2118m/bdi-miR2118b/	22	UAGGCUUGAGAGGCAUCAGGAU	:::: :: ::::::::::::	AUCCUUACCCUCCGUAGUCCUU
chr7B:412818208-412818893(+)	595-616	3.5	osa-miR2118f/osa-miR2118j/osa-miR2118m/bdi-miR2118b/	22	UGGGCAUAAGAGGCAUCAGGAA	:.:: :: :::::::::::::	AUCCUUACCCUCCGUAGUCCUU
chr7B:539786935-539787616(+)	572-593	4	osa-miR2118f/osa-miR2118j/osa-miR2118m/bdi-miR2118b/	22	UAGGAAAAGGAGGCAUCCGGAA	:::::: ::::::::: ::::	AUCCUUACCCUCCGUAGUCCUU
chr7B:539859472-539860246(+)	635-656	4	osa-miR2118f/osa-miR2118j/osa-miR2118m/bdi-miR2118b/	22	UAGGAAAAGGAGGCAUCUGGAA	:::::: ::::::::: ::::	AUCCUUACCCUCCGUAGUCCUU
chr7B:539863114-539864091(+)	908-929	4	osa-miR2118f/osa-miR2118j/osa-miR2118m/bdi-miR2118b/	22	UAGGAAAAGGAGGCAUCUGGAA	:::::: ::::::::: ::::	AUCCUUACCCUCCGUAGUCCUU
chr7B:609419191-609420008(+)	729-750	3.5	osa-miR2118f/osa-miR2118j/osa-miR2118m/bdi-miR2118b/	22	UGGGAGUGAGAGGUAUCAGGAG	:.:::.:: ::::.:::::::.	AUCCUUACCCUCCGUAGUCCUU
chr7B:610097043-610097781(+)	648-669	2.5	osa-miR2118f/osa-miR2118j/osa-miR2118m/bdi-miR2118b/	22	UAGGAGUGGUAGGCAUCAGGAA	:::::.::: ::::::::::::	AUCCUUACCCUCCGUAGUCCUU
chr7B:612321743-612322300(+)	488-509	3	osa-miR2118f/osa-miR2118j/osa-miR2118m/bdi-miR2118b/	22	UCGGCAUGAGAGGCAUCAGGAA	: :: ::: :::::::::::::	AUCCUUACCCUCCGUAGUCCUU
chr7B:616493294-616493937(-)	553-574	3.5	osa-miR2118f/osa-miR2118j/osa-miR2118m/bdi-miR2118b/	22	UUGGUGUGGGAGGCAUCGGGAA	: :: .:::::::::::.::::	AUCCUUACCCUCCGUAGUCCUU
chr7B:633898656-633899339(-)	574-595	3	osa-miR2118f/osa-miR2118j/osa-miR2118m/bdi-miR2118b/	22	UAGGAAUAGGAUGCAUCAGGAA	::::::: ::: ::::::::::	AUCCUUACCCUCCGUAGUCCUU
chr7B:633926854-633927495(-)	551-572	4	osa-miR2118f/osa-miR2118j/osa-miR2118m/bdi-miR2118b/	22	UAGGAAUAGGGUGCAUCAGGAA	::::::: ::. ::::::::::	AUCCUUACCCUCCGUAGUCCUU
chr7B:637336386-637337289(-)	834-855	4	osa-miR2118f/osa-miR2118j/osa-miR2118m/bdi-miR2118b/	22	UAGGAAUGAGAGGCCUCGGGAA	:::::::: ::::: ::.::::	AUCCUUACCCUCCGUAGUCCUU
chr7B:64134020-64134600(-)	490-511	4	osa-miR2118f/osa-miR2118j/osa-miR2118m/bdi-miR2118b/	22	UAGGACUGGGAGGCAUCGAGAA	::::: :::::::::::. :::	AUCCUUACCCUCCGUAGUCCUU
chr7B:65144627-65145186(+)	469-490	4	osa-miR2118f/osa-miR2118j/osa-miR2118m/bdi-miR2118b/	22	UAGGACUAGGAGGCAUCAGAAA	::::: : ::::::::::: ::	AUCCUUACCCUCCGUAGUCCUU
chr7B:66502728-66503521(+)	698-719	3	osa-miR2118f/osa-miR2118j/osa-miR2118m/bdi-miR2118b/	22	UAGGACUGGGAGGCAUUGGGAA	::::: ::::::::::..::::	AUCCUUACCCUCCGUAGUCCUU
chr7B:66502728-66503521(+)	698-719	3	zma-miR2118f/	22	UAGGACUGGGAGGCAUUGGGAA	:::: :::.::::::::::::	AUCCGUACCUUCCGUAACCCUU
chr7B:675961594-675962434(-)	731-752	4	osa-miR2118f/osa-miR2118j/osa-miR2118m/bdi-miR2118b/	22	UAGGUUUGAGAGGCAUUAGGAA	:::: :: :::::::.:::::	AUCCUUACCCUCCGUAGUCCUU
chr7B:677662465-677663281(+)	724-745	3	osa-miR2118f/osa-miR2118j/osa-miR2118m/bdi-miR2118b/	22	UAGGCUUGGGAGGCAUUAGGAA	:::: ::::::::::.:::::	AUCCUUACCCUCCGUAGUCCUU
chr7B:677662465-677663281(+)	724-745	4	zma-miR2118f/	22	UAGGCUUGGGAGGCAUUAGGAA	::::: :::.::::::: ::::	AUCCGUACCUUCCGUAACCCUU
chr7B:677767285-677767967(+)	594-615	4	osa-miR2118f/osa-miR2118j/osa-miR2118m/bdi-miR2118b/	22	UAGAUUUGGGAGGCAUUAGGAA	::: ::::::::::.:::::	AUCCUUACCCUCCGUAGUCCUU
chr7B:67816369-67816949(+)	469-491	4	zma-miR2118f/	22	UAGGAAUGGAAGGCGUUAGGGAA	:::: :::::::::.:: :::::	AUCCGUACCUUCCGUAA-CCCUU
chr7B:68317837-68318478(+)	574-595	3	osa-miR2118f/osa-miR2118j/osa-miR2118m/bdi-miR2118b/	22	UGGGAGUGGGAGGUAUUAGGAA	:.:::.:::::::.::.:::::	AUCCUUACCCUCCGUAGUCCUU
chr7D:106796871-106797386(-)	446-467	4	osa-miR2118f/osa-miR2118j/osa-miR2118m/bdi-miR2118b/	22	UAGACCUGGGAGGCAUCAGGGA	::: ::::::::::::::.:	AUCCUUACCCUCCGUAGUCCUU
chr7D:106918175-106918963(+)	678-700	3	osa-miR2118f/osa-miR2118j/osa-miR2118m/bdi-miR2118b/	22	UAGGCAUGGGAGGCAUCAGAGAA	:::: :::::::::::::: :::	AUCCUUACCCUCCGUAGUC-CUU
chr7D:107327921-107328541(+)	550-572	4	osa-miR2118f/osa-miR2118j/osa-miR2118m/bdi-miR2118b/	22	UAGGCAUGGGAGGCAUCGGAGAA	:::: ::::::::::::.: :::	AUCCUUACCCUCCGUAGUC-CUU
chr7D:107583309-107583889(+)	490-511	3.5	osa-miR2118f/osa-miR2118j/osa-miR2118m/bdi-miR2118b/	22	UAGAAGUCGGAGGCAUCAGGGA	::: :.: ::::::::::::.:	AUCCUUACCCUCCGUAGUCCUU
chr7D:108401940-108402478(+)	469-490	4	zma-miR2118f/	22	UAGGACUGGAAGGCACUGGGAA	:::: ::::::::: ::::::	AUCCGUACCUUCCGUAACCCUU
chr7D:109017157-109017884(+)	658-679	4	osa-miR2118f/osa-miR2118j/osa-miR2118m/bdi-miR2118b/	22	UUGGAUUGGGAGGUAUUAGGAA	: ::: :::::::.::.:::::	AUCCUUACCCUCCGUAGUCCUU
chr7D:111218759-111219819(+)	972-993	4	osa-miR2118f/osa-miR2118j/osa-miR2118m/bdi-miR2118b/	22	UAAGAAUAGGAGACAUCAGGAA	:: :::: :::: :::::::::	AUCCUUACCCUCCGUAGUCCUU
chr7D:121787464-121787939(+)	427-448	3	osa-miR2118f/osa-miR2118j/osa-miR2118m/bdi-miR2118b/	22	UAUGAAUGGGAAGCAUCAGGAA	:: :::::::: ::::::::::	AUCCUUACCCUCCGUAGUCCUU
chr7D:137785108-137785649(-)	472-493	4	osa-miR2118f/osa-miR2118j/osa-miR2118m/bdi-miR2118b/	22	UAAGCUUGGGAGGCAUCGGGAA	:: : :::::::::::.::::	AUCCUUACCCUCCGUAGUCCUU
chr7D:138175266-138175809(-)	455-476	4	zma-miR2118f/	22	UAGGCUUGAAAGGCAUCGGGAA	::::: :: ::::::: :::::	AUCCGUACCUUCCGUAACCCUU
chr7D:173919967-173920503(+)	467-488	3.5	osa-miR2118f/osa-miR2118j/osa-miR2118m/bdi-miR2118b/	22	UAGGGCUGAGAGGCAUCGGGAA	::::. :: ::::::::.::::	AUCCUUACCCUCCGUAGUCCUU
chr7D:32078052-32078712(-)	551-572	3	zma-miR2118f/	22	UAGAAAUGGAAGGUAUUGGGAA	::: ::::::::.::::::::	AUCCGUACCUUCCGUAACCCUU
chr7D:35547656-35548222(-)	457-478	2	osa-miR2118f/osa-miR2118j/osa-miR2118m/bdi-miR2118b/	22	AGGGAAUGGGAGGCAUCAGGAG	.:::::::::::::::::::.	AUCCUUACCCUCCGUAGUCCUU
chr7D:36852879-36853695(+)	698-719	3	zma-miR2118f/	22	UAGGCUUGGAAGGCACUGGGAA	::::: ::::::::: ::::::	AUCCGUACCUUCCGUAACCCUU
chr7D:37422379-37422999(+)	511-532	3.5	zma-miR2118f/	22	UGGGCUUGGAAGGCAUCGGGAA	:.::: :::::::::: :::::	AUCCGUACCUUCCGUAACCCUU
chr7D:39018175-39018863(+)	598-619	4	osa-miR2118f/osa-miR2118j/osa-miR2118m/bdi-miR2118b/	22	UAGGCAUGAGAGGCACCAGGAA	:::: ::: :::::: ::::::	AUCCUUACCCUCCGUAGUCCUU
chr7D:39550940-39551623(-)	574-595	2	zma-miR2118f/	22	UAGAAAUGGAAGGCAUUGGGAA	::: :::::::::::::::::	AUCCGUACCUUCCGUAACCCUU
chr7D:39592123-39592617(-)	404-425	3	zma-miR2118f/	22	UAGAAAUGGAAGGUAUUGGGAA	::: ::::::::.::::::::	AUCCGUACCUUCCGUAACCCUU
chr7D:39719056-39719760(+)	614-635	3	zma-miR2118f/	22	UAGAAAUGAAAGGCAUUGGGAA	::: ::: :::::::::::::	AUCCGUACCUUCCGUAACCCUU
chr7D:426778609-426779271(+)	554-574	4	osa-miR2118f/osa-miR2118j/osa-miR2118m/bdi-miR2118b/	22	UAAGAAUAGGAGGCAUC-GGAA	:: :::: ::::::::: ::::	AUCCUUACCCUCCGUAGUCCUU
chr7D:44300522-44301015(+)	405-426	3	osa-miR2118f/osa-miR2118j/osa-miR2118m/bdi-miR2118b/	22	UUGGAAUGGGAGGAAUCAGGAA	: ::::::::::: ::::::::	AUCCUUACCCUCCGUAGUCCUU
chr7D:52054877-52055517(+)	551-572	4	osa-miR2118f/osa-miR2118j/osa-miR2118m/bdi-miR2118b/	22	UAGGCUUGAGAGGCAUCAGGGA	:::: :: :::::::::::.:	AUCCUUACCCUCCGUAGUCCUU
chr7D:53331313-53331952(-)	551-572	4	osa-miR2118f/osa-miR2118j/osa-miR2118m/bdi-miR2118b/	22	UAGGAUUGAGAGGCAUUAGGGA	::::: :: :::::::.:::.:	AUCCUUACCCUCCGUAGUCCUU
chr7D:563306850-563307489(+)	530-551	4	osa-miR2118f/osa-miR2118j/osa-miR2118m/bdi-miR2118b/	22	UUGGCAUGGGAGGUAUCAGGAC	: :: ::::::::.:::::::	AUCCUUACCCUCCGUAGUCCUU
chr7D:596948698-596949383(-)	595-616	4	osa-miR2118f/osa-miR2118j/osa-miR2118m/bdi-miR2118b/	22	UAGAUCUGGGAGGCAUUAGGAA	::: ::::::::::.:::::	AUCCUUACCCUCCGUAGUCCUU
chr7D:596985062-596985829(-)	679-700	4	osa-miR2118f/osa-miR2118j/osa-miR2118m/bdi-miR2118b/	22	UAGGUUUGAGAGGCAUUAGGAA	:::: :: :::::::.:::::	AUCCUUACCCUCCGUAGUCCUU
chr7D:597122522-597123102(-)	490-511	3	osa-miR2118f/osa-miR2118j/osa-miR2118m/bdi-miR2118b/	22	UAGAUAUGGGAGGCAUUAGGAA	::: :::::::::::.:::::	AUCCUUACCCUCCGUAGUCCUU
chr7D:597160279-597160813(-)	425-446	4	osa-miR2118f/osa-miR2118j/osa-miR2118m/bdi-miR2118b/	22	UAGAUUUGGGAGGCAUUAGGAA	::: ::::::::::.:::::	AUCCUUACCCUCCGUAGUCCUU
chr7D:597178437-597178975(-)	469-490	3	osa-miR2118f/osa-miR2118j/osa-miR2118m/bdi-miR2118b/	22	UAGAUAUGGGAGGCAUUAGGAA	::: :::::::::::.:::::	AUCCUUACCCUCCGUAGUCCUU
chr7D:598147516-598148201(-)	616-637	4	osa-miR2118f/osa-miR2118j/osa-miR2118m/bdi-miR2118b/	22	UAGAUUUGGGAGGCAUUAGGAA	::: ::::::::::.:::::	AUCCUUACCCUCCGUAGUCCUU
chr7D:598181457-598182181(-)	656-677	4	osa-miR2118f/osa-miR2118j/osa-miR2118m/bdi-miR2118b/	22	UAGGUUUGAGAGGCAUUAGGAA	:::: :: :::::::.:::::	AUCCUUACCCUCCGUAGUCCUU
chr7D:598261035-598261783(-)	679-700	4	osa-miR2118f/osa-miR2118j/osa-miR2118m/bdi-miR2118b/	22	UAGAUUUGGGAGGCAUUAGGAA	::: ::::::::::.:::::	AUCCUUACCCUCCGUAGUCCUU
chr7D:598497314-598497944(+)	509-530	4	osa-miR2118f/osa-miR2118j/osa-miR2118m/bdi-miR2118b/	22	UAGAUUUGGGAGGCAUUAGGAA	::: ::::::::::.:::::	AUCCUUACCCUCCGUAGUCCUU
chr7D:598523375-598524209(+)	742-763	4	osa-miR2118f/osa-miR2118j/osa-miR2118m/bdi-miR2118b/	22	UAGAUUUGGGAGGCAUUAGGAA	::: ::::::::::.:::::	AUCCUUACCCUCCGUAGUCCUU
chrUn:179807748-179808347(-)	502-524	3	zma-miR2118f/	22	UAGGCUUGGAAGGCAAUUGGGAA	::::: ::::::::: :::::::	AUCCGUACCUUCCGU-AACCCUU
chrUn:21558984-21559627(-)	595-616	4	zma-miR2118f/	22	UAGGCUUAAGAGGCAUUGGGAA	::::: : .::::::::::::	AUCCGUACCUUCCGUAACCCUU
chrUn:21754250-21755027(-)	687-708	4	zma-miR2118f/	22	UAGGCUUGGGAGGCAAUGGGAA	::::: :::.::::: ::::::	AUCCGUACCUUCCGUAACCCUU
chrUn:450660568-450661316(+)	658-679	3	zma-miR2118f/	22	UAGAAAUGAAAGGCAUUGGGAA	::: ::: :::::::::::::	AUCCGUACCUUCCGUAACCCUU
chrUn:92630812-92631455(-)	553-574	3	osa-miR2118f/osa-miR2118j/osa-miR2118m/bdi-miR2118b/	22	UAGGAAUAGGAUGCAUCAGGAA	::::::: ::: ::::::::::	AUCCUUACCCUCCGUAGUCCUU
chr1A:380495433-380495883(-)	362-383	4	zma-miR2118g/	22	UAGGAUUAGGAUGCGUCAGGAA	::::: ::::: ::.:::::::	AUCCUUAUCCUCCGUAGUCCUU
chr1A:437233084-437233851(-)	656-677	4	zma-miR2118g/	22	UAGGAUUUGGAUGCAUCAGGAA	::::: : ::: ::::::::::	AUCCUUAUCCUCCGUAGUCCUU
chr1A:437727113-437727628(-)	404-425	4	zma-miR2118g/	22	UAGGAUUAGAAGGCGUCAGGAA	::::: ::: ::::.:::::::	AUCCUUAUCCUCCGUAGUCCUU
chr1A:494189370-494189951(-)	462-483	3.5	zma-miR2118g/	22	UUGGAAUGGGAGGCAUCAGAAA	: :::::.::::::::::: ::	AUCCUUAUCCUCCGUAGUCCUU
chr1A:513460254-513460843(+)	499-520	3.5	osa-miR2118g/zma-miR2118c/	22	UGGGAAUGAGAUGCAUUAGGAA	:.:::::: :: ::::::::::	AUCCUUACCCUCCGUAAUCCUU
chr1A:513570615-513571277(+)	572-593	3.5	osa-miR2118g/zma-miR2118c/	22	UGGGAAUGGGAUGCGUUAGGAA	:.::::::::: ::.:::::::	AUCCUUACCCUCCGUAAUCCUU
chr1A:513621626-513622261(+)	490-511	3.5	osa-miR2118g/zma-miR2118c/	22	UGGGAAUGAGAUGCAUUAGGAA	:.:::::: :: ::::::::::	AUCCUUACCCUCCGUAAUCCUU
chr1A:520433240-520434332(-)	1002-1023	2	zma-miR2118g/	22	UAGGCAUAUGAGGCAUCAGGAA	:::: ::: :::::::::::::	AUCCUUAUCCUCCGUAGUCCUU
chr1A:543386158-543386715(-)	488-509	3.5	zma-miR2118g/	22	UAGGGAUUGGAAGCAUCAGGAA	::::.:: ::: ::::::::::	AUCCUUAUCCUCCGUAGUCCUU
chr1A:556803809-556804494(+)	595-616	3	zma-miR2118g/	22	UAGGCAUAGGAGGCACCAGGAA	:::: :::::::::: ::::::	AUCCUUAUCCUCCGUAGUCCUU
chr1A:556813879-556814602(+)	614-635	3	zma-miR2118g/	22	UAGGCAUAGGAGGCACCAGGAA	:::: :::::::::: ::::::	AUCCUUAUCCUCCGUAGUCCUU
chr1A:556815712-556816776(+)	974-995	3	zma-miR2118g/	22	UAGGCAUAGGAGGCACCAGGAA	:::: :::::::::: ::::::	AUCCUUAUCCUCCGUAGUCCUU
chr1B:21331620-21332280(+)	572-593	3	osa-miR2118g/zma-miR2118c/	22	UAGGCUUGGGAGGCAUUAGGAC	:::: :::::::::::::::	AUCCUUACCCUCCGUAAUCCUU
chr1B:31311553-31312362(+)	700-721	4	osa-miR2118g/zma-miR2118c/	22	UAGGAAUGGGAAACAUUAGGAA	::::::::::: :::::::::	AUCCUUACCCUCCGUAAUCCUU
chr1B:374320212-374320664(-)	364-385	3.5	osa-miR2118g/zma-miR2118c/	22	UAGGGAUGGGCGGCAUUGGGAA	::::.::::: ::::::.::::	AUCCUUACCCUCCGUAAUCCUU
chr1B:453318529-453319189(-)	572-593	4	zma-miR2118g/	22	UAGGAUUAGAAGGCGUCAGGAA	::::: ::: ::::.:::::::	AUCCUUAUCCUCCGUAGUCCUU
chr1B:453511240-453511984(-)	635-656	4	osa-miR2118g/zma-miR2118c/	22	UAGGAUUUGGAGGCAUUCGGAA	::::: : ::::::::: ::::	AUCCUUACCCUCCGUAAUCCUU
chr1B:529430736-529431713(-)	908-929	4	zma-miR2118g/	22	UAGGCAUAAGAGGCACCAGGAA	:::: ::: :::::: ::::::	AUCCUUAUCCUCCGUAGUCCUU
chr1B:562357390-562358208(+)	728-749	3.5	osa-miR2118g/zma-miR2118c/	22	UGGGAAUGGGAUGCAUUGGGAA	:.::::::::: :::::.::::	AUCCUUACCCUCCGUAAUCCUU
chr1B:562372755-562373549(+)	685-706	3.5	osa-miR2118g/zma-miR2118c/	22	UGGGAAUGAGAUGCAUUAGGAA	:.:::::: :: ::::::::::	AUCCUUACCCUCCGUAAUCCUU
chr1B:566022243-566022863(+)	530-551	4	zma-miR2118g/	22	GGGGAAUGGGAGGCAUCAAGAA	.:::::.:::::::::: :::	AUCCUUAUCCUCCGUAGUCCUU
chr1B:573753723-573754323(-)	509-530	2.5	zma-miR2118g/	22	UGGGCAUAUGAGGCAUCAGGAA	:.:: ::: :::::::::::::	AUCCUUAUCCUCCGUAGUCCUU
chr1B:592051642-592052437(-)	707-728	4	osa-miR2118g/zma-miR2118c/	22	UAGGAAUGAGCGGCAUUGGGAA	:::::::: : ::::::.::::	AUCCUUACCCUCCGUAAUCCUU
chr1B:592210676-592211359(-)	593-614	3.5	osa-miR2118g/zma-miR2118c/	22	UCGGGAUGAGAGGCAUUGGGAA	: ::.::: ::::::::.::::	AUCCUUACCCUCCGUAAUCCUU
chr1B:595352719-595353446(-)	637-658	4	zma-miR2118g/	22	UAGGCAUAUGAGGCAGCAGGAA	:::: ::: :::::: ::::::	AUCCUUAUCCUCCGUAGUCCUU
chr1B:595442838-595443561(-)	635-656	4	zma-miR2118g/	22	UAGGAAUAUGAGGUACCAGGAA	:::::::: ::::.: ::::::	AUCCUUAUCCUCCGUAGUCCUU
chr1B:612988592-612989109(-)	448-469	3	zma-miR2118g/	22	UAGGAUUUAGAGGCAUCAGGAA	::::: : :::::::::::::	AUCCUUAUCCUCCGUAGUCCUU
chr1B:640470924-640471796(-)	763-784	4	zma-miR2118g/	22	UAGGCAUAUGAGGCAACAGGAA	:::: ::: :::::: ::::::	AUCCUUAUCCUCCGUAGUCCUU
chr1B:640481384-640481866(-)	392-413	2	zma-miR2118g/	22	UAGGCAUAGGGGGCAUCAGGAA	:::: :::::.:::::::::::	AUCCUUAUCCUCCGUAGUCCUU
chr1B:666289892-666290554(-)	637-658	4	osa-miR2118g/zma-miR2118c/	22	UAGGUAUGGGAGGCAUAGGGAA	:::: ::::::::::: .::::	AUCCUUACCCUCCGUAAUCCUU
chr1D:15531131-15531774(-)	509-530	4	osa-miR2118g/zma-miR2118c/	22	UAGGCUCGGGAGGCAUUAGGAC	:::: ::::::::::::::	AUCCUUACCCUCCGUAAUCCUU
chr1D:15624125-15624751(-)	538-559	3.5	osa-miR2118g/zma-miR2118c/	22	UGGGAUUGAGAGGCAUUAGGAU	:.::: :: ::::::::::::	AUCCUUACCCUCCGUAAUCCUU
chr1D:413351106-413351726(+)	532-553	4	osa-miR2118g/zma-miR2118c/	22	UAGGCAUAGGAGGCACUAGGAA	:::: :: ::::::: ::::::	AUCCUUACCCUCCGUAAUCCUU
chr1D:413351106-413351726(+)	532-553	4	zma-miR2118g/	22	UAGGCAUAGGAGGCACUAGGAA	:::: :::::::::: .:::::	AUCCUUAUCCUCCGUAGUCCUU
chr1D:415460637-415461218(+)	491-512	2	zma-miR2118g/	22	UCGAAAUAGGAGGCAUCAGGAA	: : ::::::::::::::::::	AUCCUUAUCCUCCGUAGUCCUU
chr1D:416037693-416038446(+)	644-665	3.5	osa-miR2118g/zma-miR2118c/	22	UGGGAAUGAGAUGCAUUAGGAA	:.:::::: :: ::::::::::	AUCCUUACCCUCCGUAAUCCUU
chr1D:416093898-416094887(+)	880-901	3	osa-miR2118g/zma-miR2118c/	22	UGGGAAUGGGAUGCAUUAGGAG	:.::::::::: :::::::::.	AUCCUUACCCUCCGUAAUCCUU
chr1D:416096690-416097380(+)	579-600	3.5	osa-miR2118g/zma-miR2118c/	22	UGGGAAUGAGAUGCAUUAGGAA	:.:::::: :: ::::::::::	AUCCUUACCCUCCGUAAUCCUU
chr1D:416875395-416876005(-)	520-541	3.5	zma-miR2118g/	22	UAGGGAUAGGAUGCAUCGGGAA	::::.:::::: :::::.::::	AUCCUUAUCCUCCGUAGUCCUU
chr1D:418644279-418645104(-)	756-777	4	osa-miR2118g/zma-miR2118c/	22	UGAGAGUGAGAGGCAUUGGGAA	:. ::.:: ::::::::.::::	AUCCUUACCCUCCGUAAUCCUU
chr1D:424538057-424538625(-)	478-499	2.5	zma-miR2118g/	22	UGGGCAUAUGAGGCAUCAGGAA	:.:: ::: :::::::::::::	AUCCUUAUCCUCCGUAGUCCUU
chr1D:424596718-424597425(-)	617-638	2	zma-miR2118g/	22	UAGGCAUAUGAGGCAUCAGGAA	:::: ::: :::::::::::::	AUCCUUAUCCUCCGUAGUCCUU
chr1D:436979148-436979852(-)	637-658	3	osa-miR2118g/zma-miR2118c/	22	UAGGAAUGGGCGGCAUUGGGAA	:::::::::: ::::::.::::	AUCCUUACCCUCCGUAAUCCUU
chr1D:437547057-437547676(+)	531-552	3	osa-miR2118g/zma-miR2118c/	22	UUGGAAUGAGAGGCAUUGGGAA	: :::::: ::::::::.::::	AUCCUUACCCUCCGUAAUCCUU
chr1D:438028805-438029449(+)	554-575	3	osa-miR2118g/zma-miR2118c/	22	UAGGAACGAGAGGCAUUGGGAA	:::::: : ::::::::.::::	AUCCUUACCCUCCGUAAUCCUU
chr1D:439086645-439087391(-)	637-658	4	zma-miR2118g/	22	UAGGCAUAUGAGGCAGCAGGAA	:::: ::: :::::: ::::::	AUCCUUAUCCUCCGUAGUCCUU
chr1D:439113111-439114273(-)	1072-1093	4	zma-miR2118g/	22	UAGGCAUAUGAGGCAGCAGGAA	:::: ::: :::::: ::::::	AUCCUUAUCCUCCGUAGUCCUU
chr1D:439125865-439126685(-)	711-732	3	zma-miR2118g/	22	UAGGAAUAUGAGGCACCAGGAA	:::::::: :::::: ::::::	AUCCUUAUCCUCCGUAGUCCUU
chr1D:447318701-447319218(-)	427-448	4	osa-miR2118g/zma-miR2118c/	22	UAGGAUUUAGAGGCAUUAGGAU	::::: : ::::::::::::	AUCCUUACCCUCCGUAAUCCUU
chr1D:447460418-447461082(-)	574-595	3	zma-miR2118g/	22	UAGGAUUUAGAGGCAUCAGGAA	::::: : :::::::::::::	AUCCUUAUCCUCCGUAGUCCUU
chr1D:447465705-447466404(-)	629-650	3.5	zma-miR2118g/	22	UAGGGAUUGGAAGCAUCAGGAA	::::.:: ::: ::::::::::	AUCCUUAUCCUCCGUAGUCCUU
chr1D:447521191-447521750(-)	490-511	3	zma-miR2118g/	22	UAGGAUUUAGAGGCAUCAGGAA	::::: : :::::::::::::	AUCCUUAUCCUCCGUAGUCCUU
chr1D:464296832-464297349(-)	427-448	3	zma-miR2118g/	22	UAGGCAUAGGAGGCACCAGGAA	:::: :::::::::: ::::::	AUCCUUAUCCUCCGUAGUCCUU
chr1D:464316556-464317262(-)	597-618	4	zma-miR2118g/	22	GAGGCAUAGGAGGCACCAGGAA	::: :::::::::: ::::::	AUCCUUAUCCUCCGUAGUCCUU
chr1D:464346605-464347227(+)	532-553	3	zma-miR2118g/	22	UAGGCAUAGGAGGCACCAGGAA	:::: :::::::::: ::::::	AUCCUUAUCCUCCGUAGUCCUU
chr1D:464374244-464374907(+)	596-617	3	zma-miR2118g/	22	UAGGCAUAGGAGGCACCAGGAA	:::: :::::::::: ::::::	AUCCUUAUCCUCCGUAGUCCUU
chr1D:464389985-464390815(+)	740-761	4	zma-miR2118g/	22	UAGGCAUAUGAGGCACCAGGAA	:::: ::: :::::: ::::::	AUCCUUAUCCUCCGUAGUCCUU
chr1D:490522303-490522863(-)	427-447	3.5	zma-miR2118g/	22	UAGGA-UGGGUGGCAUCAGGAA	::::: :.:: :::::::::::	AUCCUUAUCCUCCGUAGUCCUU
chr2A:19308782-19309920(+)	634-655	4	osa-miR2118g/zma-miR2118c/	22	UAGGCAUGUGAGGCAUUGGGAU	:::: ::: ::::::::.:::	AUCCUUACCCUCCGUAAUCCUU
chr2A:19843095-19843755(+)	551-572	4	osa-miR2118g/zma-miR2118c/	22	UGGGGAUGAGAGGUGUUAGGAA	:.::.::: ::::..:::::::	AUCCUUACCCUCCGUAAUCCUU
chr2A:20891190-20891831(+)	532-553	4	osa-miR2118g/zma-miR2118c/	22	UGAGGAUGGGGGGUAUUAGGAA	:. :.:::::.::.::::::::	AUCCUUACCCUCCGUAAUCCUU
chr2B:2697037-2697599(+)	472-493	3	osa-miR2118g/zma-miR2118c/	22	UAGGAACGAGAGGUAUUAGGAA	:::::: : ::::.::::::::	AUCCUUACCCUCCGUAAUCCUU
chr2B:647711577-647712262(-)	595-616	3	osa-miR2118g/zma-miR2118c/	22	UUGGAUUUGGAGGCAUUAGGAA	: ::: : ::::::::::::::	AUCCUUACCCUCCGUAAUCCUU
chr2B:647711577-647712262(-)	595-616	4	zma-miR2118g/	22	UUGGAUUUGGAGGCAUUAGGAA	: ::: : ::::::::.:::::	AUCCUUAUCCUCCGUAGUCCUU
chr2B:690599585-690600207(+)	532-553	2.5	zma-miR2118g/	22	UAAGAGUAGGAGGCAUCGGGAA	:: ::.:::::::::::.::::	AUCCUUAUCCUCCGUAGUCCUU
chr2D:20673791-20674472(-)	593-614	3	zma-miR2118g/	22	UGGGGUUAGGAGGCAUCGGGAA	:.::. :::::::::::.::::	AUCCUUAUCCUCCGUAGUCCUU
chr2D:21426356-21426889(-)	446-467	3	osa-miR2118g/zma-miR2118c/	22	UAGGACUGAGAGGCGUUAGGAA	::::: :: :::::.:::::::	AUCCUUACCCUCCGUAAUCCUU
chr2D:351389781-351390401(-)	530-551	3	zma-miR2118g/	22	UAGGAAUAGGUGGCAUCGGGAA	:::::::::: ::::::.::::	AUCCUUAUCCUCCGUAGUCCUU
chr2D:598886546-598886998(-)	362-383	2.5	zma-miR2118g/	22	UAGGAAUGGGAGGUGUCAGGAA	:::::::.:::::..:::::::	AUCCUUAUCCUCCGUAGUCCUU
chr2D:598886546-598886998(-)	362-383	4	osa-miR2118g/zma-miR2118c/	22	UAGGAAUGGGAGGUGUCAGGAA	:::::::::::::..: :::::	AUCCUUACCCUCCGUAAUCCUU
chr2D:598893208-598893648(-)	350-371	3.5	zma-miR2118g/	22	UAGGAAUGGGAGGUGUCAGGAU	:::::::.:::::..::::::	AUCCUUAUCCUCCGUAGUCCUU
chr2D:6932604-6933353(-)	659-680	3	osa-miR2118g/zma-miR2118c/	22	UAGGAACGAGAGGUAUUAGGAA	:::::: : ::::.::::::::	AUCCUUACCCUCCGUAAUCCUU
chr2D:6948036-6948679(-)	553-574	3	osa-miR2118g/zma-miR2118c/	22	UAGGAACGAGAGGUAUUAGGAA	:::::: : ::::.::::::::	AUCCUUACCCUCCGUAAUCCUU
chr3A:14080005-14080479(-)	365-386	2.5	zma-miR2118g/	22	UGGGAAUAGGAGGCUUCAGGAA	:.:::::::::::: :::::::	AUCCUUAUCCUCCGUAGUCCUU
chr3A:23194240-23195007(+)	677-698	3	zma-miR2118g/	22	GAGGAAUGAGAGGCAUCAGGAG	::::::. ::::::::::::.	AUCCUUAUCCUCCGUAGUCCUU
chr3A:27853925-27854569(-)	575-596	3.5	zma-miR2118g/	22	UAGGAGUUGGAGGCAUCAGAAA	:::::.: ::::::::::: ::	AUCCUUAUCCUCCGUAGUCCUU
chr3A:28441608-28442289(-)	593-614	3.5	zma-miR2118g/	22	UAGGAGUUGGAGUCAUCAGGAA	:::::.: :::: :::::::::	AUCCUUAUCCUCCGUAGUCCUU
chr3A:30144670-30145100(+)	362-383	3.5	zma-miR2118g/	22	UGGGGAUGGGAGGCUUCAGGAA	:.::.::.:::::: :::::::	AUCCUUAUCCUCCGUAGUCCUU
chr3A:32878100-32878992(+)	845-866	3	zma-miR2118g/	22	UAGGAAGAGGAGACAUCAGGAA	:::::: ::::: :::::::::	AUCCUUAUCCUCCGUAGUCCUU
chr3A:33989988-33990631(+)	553-574	4	zma-miR2118g/	22	UAGGAAAAGGAGGCACCGGGAA	:::::: :::::::: :.::::	AUCCUUAUCCUCCGUAGUCCUU
chr3A:34441136-34441833(+)	607-628	4	zma-miR2118g/	22	UAUGAAAAGGAGGCACCAGGAA	:: ::: :::::::: ::::::	AUCCUUAUCCUCCGUAGUCCUU
chr3A:478201-478842(-)	532-553	3.5	zma-miR2118g/	22	UCGGCUUGGGAGGCAUCAGGAA	: :: :.::::::::::::::	AUCCUUAUCCUCCGUAGUCCUU
chr3A:646288418-646288952(+)	446-467	3	osa-miR2118g/zma-miR2118c/	22	UAGGAAUAGGAGGCAUUGGGGA	::::::: :::::::::.::.:	AUCCUUACCCUCCGUAAUCCUU
chr3A:646288418-646288952(+)	446-467	3	zma-miR2118g/	22	UAGGAAUAGGAGGCAUUGGGGA	::::::::::::::::..::.:	AUCCUUAUCCUCCGUAGUCCUU
chr3A:691330474-691331033(-)	468-490	3.5	zma-miR2118g/	22	UGGGAAUAGUAGGCAUCCAGGAA	:.::::::: ::::::: :::::	AUCCUUAUCCUCCGUAG-UCCUU
chr3A:691457416-691458337(-)	811-833	4	zma-miR2118g/	22	UUGGAAUAGUAGGCAUCCAGGAA	: ::::::: ::::::: :::::	AUCCUUAUCCUCCGUAG-UCCUU
chr3A:691590112-691590801(-)	598-620	3.5	zma-miR2118g/	22	UGGGAAUAGUAGGCAUCCAGGAA	:.::::::: ::::::: :::::	AUCCUUAUCCUCCGUAG-UCCUU
chr3A:691631234-691631797(-)	445-467	3.5	zma-miR2118g/	22	UGGGAAUAGUAGGCAUCCAGGAA	:.::::::: ::::::: :::::	AUCCUUAUCCUCCGUAG-UCCUU
chr3A:706117639-706118319(+)	591-613	3	osa-miR2118g/zma-miR2118c/	22	UAGGAAUCGGAGGCAUAUAGGAA	::::::: :::::::: ::::::	AUCCUUACCCUCCGUA-AUCCUU
chr3A:706117639-706118319(+)	591-613	4	zma-miR2118g/	22	UAGGAAUCGGAGGCAUAUAGGAA	::::::: :::::::: .:::::	AUCCUUAUCCUCCGUA-GUCCUU
chr3A:709700940-709701644(-)	595-616	4	zma-miR2118g/	22	UAGGAAUAUGAGACAUCAGGAC	:::::::: ::: ::::::::	AUCCUUAUCCUCCGUAGUCCUU
chr3A:710261365-710262163(-)	708-729	4	zma-miR2118g/	22	UAGGAAUGUGAGACAUCAGGAG	:::::::. ::: ::::::::.	AUCCUUAUCCUCCGUAGUCCUU
chr3B:20071799-20072379(-)	472-493	3	zma-miR2118g/	22	GAGGAAUGAGAGGCAUCAGGAG	::::::. ::::::::::::.	AUCCUUAUCCUCCGUAGUCCUU
chr3B:34115749-34116236(-)	258-279	4	zma-miR2118g/	22	UAGGAGUAGGAGGCAUCGGUAG	:::::.:::::::::::.: :.	AUCCUUAUCCUCCGUAGUCCUU
chr3B:34115749-34116236(-)	397-418	3	zma-miR2118g/	22	UAGGAGUAGGAGGCAUCAGUAG	:::::.::::::::::::: :.	AUCCUUAUCCUCCGUAGUCCUU
chr3B:41153000-41153620(-)	530-551	4	zma-miR2118g/	22	UGGAAUUGGGGGGCAUCAGGAA	:.: : :.::.:::::::::::	AUCCUUAUCCUCCGUAGUCCUU
chr3B:41585935-41586434(-)	430-451	4	zma-miR2118g/	22	UAGGAAAAGGAGGCACCGGGAA	:::::: :::::::: :.::::	AUCCUUAUCCUCCGUAGUCCUU
chr3B:42550625-42551268(+)	553-574	3	zma-miR2118g/	22	UAGGAAAAGGAGGCAGCAGGAA	:::::: :::::::: ::::::	AUCCUUAUCCUCCGUAGUCCUU
chr3B:5535661-5536640(-)	382-403	4	osa-miR2118g/zma-miR2118c/	22	UAGGAAUAGGAGGCAAUAGGGA	::::::: ::::::: ::::.:	AUCCUUACCCUCCGUAAUCCUU
chr3B:5535661-5536640(-)	382-403	4	zma-miR2118g/	22	UAGGAAUAGGAGGCAAUAGGGA	::::::::::::::: .:::.:	AUCCUUAUCCUCCGUAGUCCUU
chr3B:683783443-683784189(-)	656-677	3.5	zma-miR2118g/	22	UAGGACUGCGAGGCGUCAGGAA	::::: :. :::::.:::::::	AUCCUUAUCCUCCGUAGUCCUU
chr3B:684048689-684049386(-)	607-628	4	zma-miR2118g/	22	UAGGAUUAUGAGGCGUCGGGAA	::::: :: :::::.::.::::	AUCCUUAUCCUCCGUAGUCCUU
chr3B:684051112-684051985(-)	783-804	3	zma-miR2118g/	22	UAGAAUUAGGAGGCAUCGGGAA	::: : :::::::::::.::::	AUCCUUAUCCUCCGUAGUCCUU
chr3B:736935989-736936904(-)	826-848	4	zma-miR2118g/	22	UUGGAAUAGUAGGCAUACAGGAA	: ::::::: :::::: ::::::	AUCCUUAUCCUCCGUA-GUCCUU
chr3B:737435612-737436085(-)	382-404	3.5	zma-miR2118g/	22	UGGGAAUAGAAGGCAUCCAGGAA	:.::::::: ::::::: :::::	AUCCUUAUCCUCCGUAG-UCCUU
chr3B:737559767-737560585(-)	708-730	4	zma-miR2118g/	22	UUGGAAUAGUAGGCAUCCAGGAA	: ::::::: ::::::: :::::	AUCCUUAUCCUCCGUAG-UCCUU
chr3B:758231247-758231915(-)	577-599	4	zma-miR2118g/	22	UUGGACUAGGAGGCAUUCAGGAA	: ::: :::::::::: ::::::	AUCCUUAUCCUCCGUA-GUCCUU
chr3B:758457686-758458138(-)	362-383	3	zma-miR2118g/	22	UUGGACUAGGAGGCAUCAGGGA	: ::: ::::::::::::::.:	AUCCUUAUCCUCCGUAGUCCUU
chr3B:760446681-760447362(+)	614-635	3	osa-miR2118g/zma-miR2118c/	22	UUGGAAUGGGAGGUGUUAGGAA	: :::::::::::..:::::::	AUCCUUACCCUCCGUAAUCCUU
chr3B:760471119-760471867(-)	658-679	4	osa-miR2118g/zma-miR2118c/	22	UAGGAAUGAGAGGUAUUUGGAA	:::::::: ::::.::: ::::	AUCCUUACCCUCCGUAAUCCUU
chr3B:762831487-762832240(+)	664-686	2.5	osa-miR2118g/zma-miR2118c/	22	UGGGAAUGGGAGGCAUUAAGGAA	:.:::::::::::::::: ::::	AUCCUUACCCUCCGUAAU-CCUU
chr3B:762831487-762832240(+)	664-686	4	zma-miR2118g/	22	UGGGAAUGGGAGGCAUUAAGGAA	:.:::::.::::::::.: ::::	AUCCUUAUCCUCCGUAGU-CCUU
chr3B:763068441-763069059(+)	509-530	3.5	osa-miR2118g/zma-miR2118c/	22	UGUGAAUGGGAGGCAUUCGGAA	:. :::::::::::::: ::::	AUCCUUACCCUCCGUAAUCCUU
chr3B:763110332-763110826(+)	406-427	3.5	osa-miR2118g/zma-miR2118c/	22	UGGGAACGGGAGGCAUUUGGAA	:.:::: :::::::::: ::::	AUCCUUACCCUCCGUAAUCCUU
chr3B:763936579-763937474(+)	805-826	4	zma-miR2118g/	22	UGGGAAUAUGAGACAUCAGGAG	:.:::::: ::: ::::::::.	AUCCUUAUCCUCCGUAGUCCUU
chr3B:764185717-764186234(+)	448-469	3	zma-miR2118g/	22	UGGGAAUAGGAGACAUCAGGAG	:.:::::::::: ::::::::.	AUCCUUAUCCUCCGUAGUCCUU
chr3B:764234889-764235572(+)	595-616	3.5	zma-miR2118g/	22	UAGGAAUAUGAGACAUCAGGAG	:::::::: ::: ::::::::.	AUCCUUAUCCUCCGUAGUCCUU
chr3B:764272719-764273383(+)	574-595	4	zma-miR2118g/	22	UGGGAAUAUGAGACAUCAGGAG	:.:::::: ::: ::::::::.	AUCCUUAUCCUCCGUAGUCCUU
chr3B:764426243-764426756(+)	425-446	3	zma-miR2118g/	22	UGGGAAUAGGAGACAUCAGGAG	:.:::::::::: ::::::::.	AUCCUUAUCCUCCGUAGUCCUU
chr3B:775709168-775709792(-)	534-555	4	osa-miR2118g/zma-miR2118c/	22	UAGGAUUGGGUGGCAUUGGGAA	::::: :::: ::::::.::::	AUCCUUACCCUCCGUAAUCCUU
chr3B:777656744-777657385(+)	532-553	3.5	zma-miR2118g/	22	UAGGAGUAGGAGGCAUGGGGAA	:::::.:::::::::: .::::	AUCCUUAUCCUCCGUAGUCCUU
chr3B:777658851-777659344(+)	405-426	3.5	zma-miR2118g/	22	UUGGAGUAGGAGGCAUGAGGAA	: :::.:::::::::: :::::	AUCCUUAUCCUCCGUAGUCCUU
chr3B:777812000-777812474(+)	383-404	2.5	zma-miR2118g/	22	UAGGAGUAGGAGGCAUGAGGAA	:::::.:::::::::: :::::	AUCCUUAUCCUCCGUAGUCCUU
chr3B:777812000-777812474(+)	383-404	3.5	osa-miR2118g/zma-miR2118c/	22	UAGGAGUAGGAGGCAUGAGGAA	:::::.: :::::::: :::::	AUCCUUACCCUCCGUAAUCCUU
chr3B:778142898-778143625(-)	637-658	4	osa-miR2118g/zma-miR2118c/	22	UAGUAUUAGGAGGCAUUGGGAA	::: : : :::::::::.::::	AUCCUUACCCUCCGUAAUCCUU
chr3B:778142898-778143625(-)	637-658	4	zma-miR2118g/	22	UAGUAUUAGGAGGCAUUGGGAA	::: : ::::::::::..::::	AUCCUUAUCCUCCGUAGUCCUU
chr3D:13813227-13813910(-)	595-616	3.5	zma-miR2118g/	22	GAGGGAUGAGAGGCAUCAGGAG	:::.::. ::::::::::::.	AUCCUUAUCCUCCGUAGUCCUU
chr3D:16427752-16428477(+)	637-658	4	zma-miR2118g/	22	UAGGAAAAGGAGGCACCGGGAA	:::::: :::::::: :.::::	AUCCUUAUCCUCCGUAGUCCUU
chr3D:20035192-20035811(-)	519-540	3	zma-miR2118g/	22	UAGGAAUUGGAGGCAUCAGAAA	::::::: ::::::::::: ::	AUCCUUAUCCUCCGUAGUCCUU
chr3D:20320504-20321145(-)	572-593	3	zma-miR2118g/	22	UAGGAAUUGGAGGCAUCAGAAA	::::::: ::::::::::: ::	AUCCUUAUCCUCCGUAGUCCUU
chr3D:20815494-20816114(-)	532-553	3.5	zma-miR2118g/	22	UAGGAGUUGGAGUCAUCAGGAA	:::::.: :::: :::::::::	AUCCUUAUCCUCCGUAGUCCUU
chr3D:20895270-20895995(-)	637-658	3.5	zma-miR2118g/	22	UAGGAGUUGGAAGCAUCAGGAA	:::::.: ::: ::::::::::	AUCCUUAUCCUCCGUAGUCCUU
chr3D:23732801-23733591(+)	700-721	3	zma-miR2118g/	22	UAGGAAAAGGAGACAUCAGGAA	:::::: ::::: :::::::::	AUCCUUAUCCUCCGUAGUCCUU
chr3D:24126845-24127516(+)	583-604	2	zma-miR2118g/	22	UAGGAAAAGGAGGCAUCGGGAA	:::::: ::::::::::.::::	AUCCUUAUCCUCCGUAGUCCUU
chr3D:24528453-24529428(+)	866-887	4	zma-miR2118g/	22	UAGGAAAAGGAGGCACCGGGAA	:::::: :::::::: :.::::	AUCCUUAUCCUCCGUAGUCCUU
chr3D:24614504-24615103(+)	509-530	3	zma-miR2118g/	22	UGGAAUUGGGAGGCAUCAGGAA	:.: : :.::::::::::::::	AUCCUUAUCCUCCGUAGUCCUU
chr3D:25109512-25110197(+)	595-616	3	zma-miR2118g/	22	UAGGAAAAGGAGGCACCAGGAA	:::::: :::::::: ::::::	AUCCUUAUCCUCCGUAGUCCUU
chr3D:535552518-535553077(+)	511-532	2.5	zma-miR2118g/	22	AGGGAAUAUGAGGCAUCAGGAA	.:::::: :::::::::::::	AUCCUUAUCCUCCGUAGUCCUU
chr3D:572437047-572437816(-)	679-700	3.5	osa-miR2118g/zma-miR2118c/	22	UGUGAAUGGGAGGCAUUUGGAA	:. :::::::::::::: ::::	AUCCUUACCCUCCGUAAUCCUU
chr3D:572486330-572486971(-)	550-572	4	osa-miR2118g/zma-miR2118c/	22	UACGAAUGGGAGGCAUAUGGGAA	:: ::::::::::::: :.::::	AUCCUUACCCUCCGUA-AUCCUU
chr3D:573442288-573443015(+)	636-658	3.5	osa-miR2118g/zma-miR2118c/	22	UGGGAAUGGCAGGCAUUAAGGAA	:.::::::: :::::::: ::::	AUCCUUACCCUCCGUAAU-CCUU
chr3D:574441510-574442083(-)	506-527	3.5	zma-miR2118g/	22	UAGGAAUAUGAGACAUCAGGAG	:::::::: ::: ::::::::.	AUCCUUAUCCUCCGUAGUCCUU
chr3D:574522041-574522724(-)	595-616	3	zma-miR2118g/	22	UGGGAAUAGGAGCCAUCAGGAG	:.:::::::::: ::::::::.	AUCCUUAUCCUCCGUAGUCCUU
chr3D:574531505-574532146(-)	551-572	4	zma-miR2118g/	22	UGGGAAUACGAGACAUCAGGAG	:.:::::: ::: ::::::::.	AUCCUUAUCCUCCGUAGUCCUU
chr3D:575329247-575329898(-)	563-584	4	zma-miR2118g/	22	UGGGAAUAUGAGACAUCAGGAG	:.:::::: ::: ::::::::.	AUCCUUAUCCUCCGUAGUCCUU
chr3D:575347921-575348769(-)	739-760	4	zma-miR2118g/	22	UGGGAAUAUGAGACAUCAGGAG	:.:::::: ::: ::::::::.	AUCCUUAUCCUCCGUAGUCCUU
chr3D:580906936-580907552(-)	488-509	2.5	zma-miR2118g/	22	UAGGAGUAGGAGGCAUGAGGAA	:::::.:::::::::: :::::	AUCCUUAUCCUCCGUAGUCCUU
chr3D:580906936-580907552(-)	488-509	3.5	osa-miR2118g/zma-miR2118c/	22	UAGGAGUAGGAGGCAUGAGGAA	:::::.: :::::::: :::::	AUCCUUACCCUCCGUAAUCCUU
chr3D:580998499-580998991(-)	364-385	2.5	zma-miR2118g/	22	UAGGAGUAGGAGGCAUGAGGAA	:::::.:::::::::: :::::	AUCCUUAUCCUCCGUAGUCCUU
chr3D:580998499-580998991(-)	364-385	3.5	osa-miR2118g/zma-miR2118c/	22	UAGGAGUAGGAGGCAUGAGGAA	:::::.: :::::::: :::::	AUCCUUACCCUCCGUAAUCCUU
chr3D:581010305-581010818(-)	425-446	3.5	zma-miR2118g/	22	UAGGAGGAGGAGGCAUGAGGAA	:::::. ::::::::: :::::	AUCCUUAUCCUCCGUAGUCCUU
chr3D:581076329-581076891(-)	472-493	2.5	zma-miR2118g/	22	UAGGAGUAGGAGGCAUGAGGAA	:::::.:::::::::: :::::	AUCCUUAUCCUCCGUAGUCCUU
chr3D:581076329-581076891(-)	472-493	3.5	osa-miR2118g/zma-miR2118c/	22	UAGGAGUAGGAGGCAUGAGGAA	:::::.: :::::::: :::::	AUCCUUACCCUCCGUAAUCCUU
chr4A:632785446-632786240(+)	677-698	2.5	zma-miR2118g/	22	UAGCAAUGGGAGGCAUCGGGAA	::: :::.:::::::::.::::	AUCCUUAUCCUCCGUAGUCCUU
chr4A:632785446-632786240(+)	677-698	4	osa-miR2118g/zma-miR2118c/	22	UAGCAAUGGGAGGCAUCGGGAA	::: :::::::::::: .::::	AUCCUUACCCUCCGUAAUCCUU
chr4A:642598636-642599444(+)	699-720	3.5	zma-miR2118g/	22	UAGGAAUCGGAGACAUCAGGAG	::::::: :::: ::::::::.	AUCCUUAUCCUCCGUAGUCCUU
chr4A:644661399-644661989(-)	500-521	4	zma-miR2118g/	22	UAGGACUAGGAAGCAUCAGGAU	::::: ::::: :::::::::	AUCCUUAUCCUCCGUAGUCCUU
chr4A:644712002-644712391(-)	299-320	4	zma-miR2118g/	22	UAGGACUAGGAAGCAUCAGGAU	::::: ::::: :::::::::	AUCCUUAUCCUCCGUAGUCCUU
chr4A:645071119-645071634(-)	425-446	4	zma-miR2118g/	22	UAGGAUUAGGAAGCAUCAGGAU	::::: ::::: :::::::::	AUCCUUAUCCUCCGUAGUCCUU
chr4A:645107796-645108502(-)	616-637	4	zma-miR2118g/	22	UAGGACUAGGAAGCAUCAGGAU	::::: ::::: :::::::::	AUCCUUAUCCUCCGUAGUCCUU
chr4A:648590107-648590663(-)	489-510	2	zma-miR2118g/	22	UAGGAAUAGGAGGCAGCAGGAA	::::::::::::::: ::::::	AUCCUUAUCCUCCGUAGUCCUU
chr4A:686636623-686637306(-)	593-614	4	zma-miR2118g/	22	UGGGAAUUGGAGGCAUCAGAAG	:.::::: ::::::::::: :.	AUCCUUAUCCUCCGUAGUCCUU
chr4A:686927123-686927535(-)	322-343	3	osa-miR2118g/zma-miR2118c/	22	UAGGAUUAGGAGGCAUUGGGAA	::::: : :::::::::.::::	AUCCUUACCCUCCGUAAUCCUU
chr4A:686927123-686927535(-)	322-343	3	zma-miR2118g/	22	UAGGAUUAGGAGGCAUUGGGAA	::::: ::::::::::..::::	AUCCUUAUCCUCCGUAGUCCUU
chr4A:688473523-688473977(-)	385-406	4	osa-miR2118g/zma-miR2118c/	22	UGAGAAUUGGAGGCAUUGGGAG	:. :::: :::::::::.:::.	AUCCUUACCCUCCGUAAUCCUU
chr4A:688964727-688965366(-)	551-572	3	zma-miR2118g/	22	UGGGAACCGGAGGCAUCAGGAG	:.:::: :::::::::::::.	AUCCUUAUCCUCCGUAGUCCUU
chr4A:694944767-694945452(-)	595-616	3	zma-miR2118g/	22	UAGGAAUUAGAGGCAUCAGGAC	::::::: ::::::::::::	AUCCUUAUCCUCCGUAGUCCUU
chr4A:698090756-698091376(-)	511-532	3.5	zma-miR2118g/	22	UAUGACUGGGAGGCAUCGGGAA	:: :: :.:::::::::.::::	AUCCUUAUCCUCCGUAGUCCUU
chr4A:719680833-719681392(-)	469-490	4	zma-miR2118g/	22	AGGGGAUAUGAGGCAUCGGGAA	.::.::: ::::::::.::::	AUCCUUAUCCUCCGUAGUCCUU
chr4A:720959510-720960107(+)	530-551	3.5	osa-miR2118g/zma-miR2118c/	22	UGGGAAUAAGAGGCAUUGGGAA	:.::::: ::::::::.::::	AUCCUUACCCUCCGUAAUCCUU
chr4A:720959510-720960107(+)	530-551	3.5	zma-miR2118g/	22	UGGGAAUAAGAGGCAUUGGGAA	:.:::::: :::::::..::::	AUCCUUAUCCUCCGUAGUCCUU
chr4A:723798928-723799560(-)	542-563	1.5	zma-miR2118g/	22	UGAGAAUAGGAGGCAUCAGGAA	:. :::::::::::::::::::	AUCCUUAUCCUCCGUAGUCCUU
chr4B:10479944-10480703(+)	650-671	4	osa-miR2118g/zma-miR2118c/	22	UAGAAAUGGGAGGCCUUGGGAA	::: :::::::::: ::.::::	AUCCUUACCCUCCGUAAUCCUU
chr4B:22904940-22905583(-)	553-575	4	zma-miR2118g/	22	UGGGCAUGGGAGGCAUCCAGGAA	:.:: ::.::::::::: :::::	AUCCUUAUCCUCCGUAG-UCCUU
chr4B:35183613-35184168(-)	488-509	3.5	osa-miR2118g/zma-miR2118c/	22	UGGGCAUGGGAGGCCUUAGGAA	:.:: ::::::::: :::::::	AUCCUUACCCUCCGUAAUCCUU
chr4B:35210441-35211187(-)	656-677	2.5	osa-miR2118g/zma-miR2118c/	22	UGGGCAUGAGAGGCAUUAGGAA	:.:: ::: :::::::::::::	AUCCUUACCCUCCGUAAUCCUU
chr4B:35210441-35211187(-)	656-677	4	zma-miR2118g/	22	UGGGCAUGAGAGGCAUUAGGAA	:.:: ::. :::::::.:::::	AUCCUUAUCCUCCGUAGUCCUU
chr4B:3583746-3584618(+)	165-186	3	osa-miR2118g/zma-miR2118c/	22	UACGAAUGUGAGGCAUUGGGAA	:: ::::: ::::::::.::::	AUCCUUACCCUCCGUAAUCCUU
chr4D:12550357-12551170(-)	722-743	4	zma-miR2118g/	22	UAAGCAUGGGAGGCAUCGGGAG	:: : ::.:::::::::.:::.	AUCCUUAUCCUCCGUAGUCCUU
chr5A:11528072-11528587(-)	448-469	4	zma-miR2118g/	22	UAGGCAUAGAAGGCAUCGGGAA	:::: :::: :::::::.::::	AUCCUUAUCCUCCGUAGUCCUU
chr5A:11748195-11748688(-)	424-445	4	osa-miR2118g/zma-miR2118c/	22	UAGGAAUGAGAGGGAUUGGGAA	:::::::: :::: :::.::::	AUCCUUACCCUCCGUAAUCCUU
chr5A:17390169-17390813(+)	575-596	4	zma-miR2118g/	22	UAGGCAUAGAAGGCGUCAGGAA	:::: :::: ::::.:::::::	AUCCUUAUCCUCCGUAGUCCUU
chr5A:17436955-17437617(+)	574-595	4	zma-miR2118g/	22	UUGGCAUAGGAGGCUUCAGGAA	: :: ::::::::: :::::::	AUCCUUAUCCUCCGUAGUCCUU
chr5A:34664053-34664715(+)	572-593	4	osa-miR2118g/zma-miR2118c/	22	UAGAAAUGGGAGGUGUUAGGGA	::: :::::::::..:::::.:	AUCCUUACCCUCCGUAAUCCUU
chr5A:398983704-398984199(-)	404-425	4	osa-miR2118g/zma-miR2118c/	22	UAGGAUUGGGAGGCAUGGGGAA	::::: :::::::::: .::::	AUCCUUACCCUCCGUAAUCCUU
chr5A:554852452-554853154(+)	592-614	4	zma-miR2118g/	22	UAGGCAUUGGAGGCAUACAGGAA	:::: :: :::::::: ::::::	AUCCUUAUCCUCCGUA-GUCCUU
chr5A:555181455-555182223(+)	656-677	4	zma-miR2118g/	22	UAGGAUUAGGAGGCAUGAGGGA	::::: :::::::::: :::.:	AUCCUUAUCCUCCGUAGUCCUU
chr5A:559089641-559090199(-)	470-491	3.5	zma-miR2118g/	22	UAGGACUGGGAGGCACCAGGAA	::::: :.::::::: ::::::	AUCCUUAUCCUCCGUAGUCCUU
chr5A:566615549-566616234(+)	595-616	4	osa-miR2118g/zma-miR2118c/	22	UAGGAUUGUGAGGUAUUGGGAA	::::: :: ::::.:::.::::	AUCCUUACCCUCCGUAAUCCUU
chr5A:601151344-601152294(+)	859-880	4	zma-miR2118g/	22	UAGGAAUGGGAGGCAACGGGAG	:::::::.::::::: :.:::.	AUCCUUAUCCUCCGUAGUCCUU
chr5A:601196260-601196984(+)	635-656	4	zma-miR2118g/	22	UAAGAAUGGUAGGCAUCAGGAG	:: ::::.: :::::::::::.	AUCCUUAUCCUCCGUAGUCCUU
chr5A:601750444-601751150(+)	616-637	4	zma-miR2118g/	22	UGGGAAUGAGUGGCAUCAGGAA	:.:::::. : :::::::::::	AUCCUUAUCCUCCGUAGUCCUU
chr5A:641114758-641115502(+)	677-698	4	zma-miR2118g/	22	UAAGAAGAGGAGGCAUCUGGAA	:: ::: :::::::::: ::::	AUCCUUAUCCUCCGUAGUCCUU
chr5B:13464993-13465671(-)	511-533	4	zma-miR2118g/	22	UAUGGAAUAGGAGGCACCGGGAA	:: ::::::::::::: :.::::	AU-CCUUAUCCUCCGUAGUCCUU
chr5B:13698453-13699096(-)	553-574	3	zma-miR2118g/	22	UAGGCAUAGGAGGCACCAGGAA	:::: :::::::::: ::::::	AUCCUUAUCCUCCGUAGUCCUU
chr5B:13814598-13815389(-)	701-722	4	zma-miR2118g/	22	UGAGCAUGAGAGGCAUCAGGAA	:. : ::. :::::::::::::	AUCCUUAUCCUCCGUAGUCCUU
chr5B:304275928-304276716(+)	679-700	3.5	osa-miR2118g/zma-miR2118c/	22	UGGGAAUAUGAGGCAUUGGGAA	:.::::: ::::::::.::::	AUCCUUACCCUCCGUAAUCCUU
chr5B:304275928-304276716(+)	679-700	3.5	zma-miR2118g/	22	UGGGAAUAUGAGGCAUUGGGAA	:.:::::: :::::::..::::	AUCCUUAUCCUCCGUAGUCCUU
chr5B:523365202-523365751(-)	440-461	4	osa-miR2118g/zma-miR2118c/	22	UAGGAUUGGGAGGCAAUGGGAA	::::: ::::::::: :.::::	AUCCUUACCCUCCGUAAUCCUU
chr5B:533991030-533991998(+)	739-761	4	zma-miR2118g/	22	UAGGCAUUGGAGGCAUACAGGAA	:::: :: :::::::: ::::::	AUCCUUAUCCUCCGUA-GUCCUU
chr5B:539303121-539303675(-)	464-485	2	zma-miR2118g/	22	UAGGGCUGGGAGGCAUCAGGAA	::::. :.::::::::::::::	AUCCUUAUCCUCCGUAGUCCUU
chr5B:539303121-539303675(-)	464-485	3.5	osa-miR2118g/zma-miR2118c/	22	UAGGGCUGGGAGGCAUCAGGAA	::::. :::::::::: :::::	AUCCUUACCCUCCGUAAUCCUU
chr5B:547141458-547142097(+)	593-614	3	osa-miR2118g/zma-miR2118c/	22	UCGGAAUAGGAGGCAUUGGGAA	: ::::: :::::::::.::::	AUCCUUACCCUCCGUAAUCCUU
chr5B:547141458-547142097(+)	593-614	3	zma-miR2118g/	22	UCGGAAUAGGAGGCAUUGGGAA	: ::::::::::::::..::::	AUCCUUAUCCUCCGUAGUCCUU
chr5B:547279050-547279778(+)	638-659	3.5	osa-miR2118g/zma-miR2118c/	22	UGGGAUUGUGAGGCAUUGGGAA	:.::: :: ::::::::.::::	AUCCUUACCCUCCGUAAUCCUU
chr5B:547529308-547529951(+)	553-574	4	osa-miR2118g/zma-miR2118c/	22	UAGGAUUGUGAGGUAUUGGGAA	::::: :: ::::.:::.::::	AUCCUUACCCUCCGUAAUCCUU
chr5B:547551694-547552235(+)	451-472	3	osa-miR2118g/zma-miR2118c/	22	UAGGAAUGUGAGGUAUUGGGAA	:::::::: ::::.:::.::::	AUCCUUACCCUCCGUAAUCCUU
chr5B:547911026-547911737(+)	644-665	4	osa-miR2118g/zma-miR2118c/	22	UAGGCAUGGGAAGCAUUAGGAU	:::: :::::: :::::::::	AUCCUUACCCUCCGUAAUCCUU
chr5B:591476110-591476634(+)	476-497	4	zma-miR2118g/	22	UUGGAAUAAGCGGCAUCAGGAA	: :::::: : :::::::::::	AUCCUUAUCCUCCGUAGUCCUU
chr5B:596502052-596502987(+)	826-847	3.5	zma-miR2118g/	22	UGGGAAUAAGAGACAUCAGGAA	:.:::::: ::: :::::::::	AUCCUUAUCCUCCGUAGUCCUU
chr5B:636933656-636934213(+)	490-511	4	zma-miR2118g/	22	UUGGAUUAGGAGGCAUGAGGAA	: ::: :::::::::: :::::	AUCCUUAUCCUCCGUAGUCCUU
chr5B:643939867-643940590(+)	656-677	3	zma-miR2118g/	22	UAGGAAGAGGAGGCAUCUGGAA	:::::: :::::::::: ::::	AUCCUUAUCCUCCGUAGUCCUU
chr5B:672165192-672165792(-)	510-531	3	zma-miR2118g/	22	UAGGUGUGCGAGGCAUCAGGAA	:::: .:. :::::::::::::	AUCCUUAUCCUCCGUAGUCCUU
chr5B:674495940-674496447(+)	417-438	4	zma-miR2118g/	22	UAGGCGUGUGAGGCAUCAGGAU	:::: .:. ::::::::::::	AUCCUUAUCCUCCGUAGUCCUU
chr5B:704980722-704981319(+)	488-509	4	osa-miR2118g/zma-miR2118c/	22	UAGGCAUUGAAGGCAUUAGGAA	:::: :: : ::::::::::::	AUCCUUACCCUCCGUAAUCCUU
chr5D:268534055-268534658(+)	513-534	2.5	osa-miR2118g/zma-miR2118c/	22	UGGGAAUAGGAGGCAUUGGGAA	:.::::: :::::::::.::::	AUCCUUACCCUCCGUAAUCCUU
chr5D:268534055-268534658(+)	513-534	2.5	zma-miR2118g/	22	UGGGAAUAGGAGGCAUUGGGAA	:.::::::::::::::..::::	AUCCUUAUCCUCCGUAGUCCUU
chr5D:434563979-434564705(+)	657-678	4	zma-miR2118g/	22	UGGGAAUGUGAGGCAACAGGAA	:.:::::. :::::: ::::::	AUCCUUAUCCUCCGUAGUCCUU
chr5D:438834302-438835134(+)	741-763	4	zma-miR2118g/	22	UAGGCAUUGGAGGCAUACAGGAA	:::: :: :::::::: ::::::	AUCCUUAUCCUCCGUA-GUCCUU
chr5D:443016485-443017017(-)	444-465	2	zma-miR2118g/	22	UAGGGCUGGGAGGCAUCAGGAA	::::. :.::::::::::::::	AUCCUUAUCCUCCGUAGUCCUU
chr5D:443016485-443017017(-)	444-465	3.5	osa-miR2118g/zma-miR2118c/	22	UAGGGCUGGGAGGCAUCAGGAA	::::. :::::::::: :::::	AUCCUUACCCUCCGUAAUCCUU
chr5D:44414178-44414716(+)	448-469	3.5	osa-miR2118g/zma-miR2118c/	22	UGGAAAUGGGAGGUGUUAGGAA	:.: :::::::::..:::::::	AUCCUUACCCUCCGUAAUCCUU
chr5D:447977748-447978830(+)	992-1013	3	osa-miR2118g/zma-miR2118c/	22	UCGGAAUAGGAGGCAUUGGGAA	: ::::: :::::::::.::::	AUCCUUACCCUCCGUAAUCCUU
chr5D:447977748-447978830(+)	992-1013	3	zma-miR2118g/	22	UCGGAAUAGGAGGCAUUGGGAA	: ::::::::::::::..::::	AUCCUUAUCCUCCGUAGUCCUU
chr5D:447985731-447986561(+)	742-763	2	osa-miR2118g/zma-miR2118c/	22	UCGGAAUAGGAGGCAUUAGGAA	: ::::: ::::::::::::::	AUCCUUACCCUCCGUAAUCCUU
chr5D:447985731-447986561(+)	742-763	2	zma-miR2118g/	22	UCGGAAUAGGAGGCAUUAGGAA	: ::::::::::::::.:::::	AUCCUUAUCCUCCGUAGUCCUU
chr5D:451688049-451688816(-)	677-698	2.5	zma-miR2118g/	22	UAGGAAGGAGAGGCAUCAGGAA	:::::: . :::::::::::::	AUCCUUAUCCUCCGUAGUCCUU
chr5D:451688049-451688816(-)	677-698	4	osa-miR2118g/zma-miR2118c/	22	UAGGAAGGAGAGGCAUCAGGAA	:::::: : ::::::: :::::	AUCCUUACCCUCCGUAAUCCUU
chr5D:482012874-482013578(+)	595-616	4	zma-miR2118g/	22	UUGGAAUAAGCGGCAUCAGGAA	: :::::: : :::::::::::	AUCCUUAUCCUCCGUAGUCCUU
chr5D:482416909-482417448(+)	449-470	4	zma-miR2118g/	22	UGGGAAUGAGUGGCAUCAGGAA	:.:::::. : :::::::::::	AUCCUUAUCCUCCGUAGUCCUU
chr5D:482762019-482762786(-)	677-698	4	zma-miR2118g/	22	UGGCAAUGGGAGGUGUCAGGAA	:.: :::.:::::..:::::::	AUCCUUAUCCUCCGUAGUCCUU
chr5D:495789266-495789825(+)	469-490	4	zma-miR2118g/	22	UAGGAGUGAGAUGCAUCAGGAA	:::::.:. :: ::::::::::	AUCCUUAUCCUCCGUAGUCCUU
chr5D:500972830-500973537(-)	616-638	3	zma-miR2118g/	22	UAAGAAUAGGAGGCAUCAUGGAA	:: ::::::::::::::: ::::	AUCCUUAUCCUCCGUAGU-CCUU
chr5D:512895103-512895914(+)	721-742	4	zma-miR2118g/	22	UAAGAAGAGGAGGCAUCUGGAA	:: ::: :::::::::: ::::	AUCCUUAUCCUCCGUAGUCCUU
chr5D:513013945-513014646(+)	592-613	4	zma-miR2118g/	22	UAGGAAGAGGAGGUAUCCGGAA	:::::: ::::::.::: ::::	AUCCUUAUCCUCCGUAGUCCUU
chr6A:24240317-24240857(+)	470-491	2	zma-miR2118g/	22	UGGGAGUAGGAGGCGUCAGGAA	:.:::.::::::::.:::::::	AUCCUUAUCCUCCGUAGUCCUU
chr6A:560635448-560636066(+)	530-551	3.5	osa-miR2118g/zma-miR2118c/	22	UGGGAAUGAGCGGCAUUAGGAA	:.:::::: : :::::::::::	AUCCUUACCCUCCGUAAUCCUU
chr6A:588597241-588597903(-)	574-595	3.5	osa-miR2118g/zma-miR2118c/	22	UGGGCAUGGAAGGCAUUAGGAA	:.:: :::: ::::::::::::	AUCCUUACCCUCCGUAAUCCUU
chr6A:7097701-7098445(-)	719-740	4	zma-miR2118g/	22	UGGGAGUAAGAGGUAUCGGGAA	:.:::.:: ::::.:::.::::	AUCCUUAUCCUCCGUAGUCCUU
chr6A:97091809-97092431(+)	532-553	3	osa-miR2118g/zma-miR2118c/	22	UAGGAUUGGGAGACAUUAGGAA	::::: :::::: :::::::::	AUCCUUACCCUCCGUAAUCCUU
chr6A:97354939-97355643(+)	614-635	4	osa-miR2118g/zma-miR2118c/	22	UAGGAUUUGGAGACAUUAGGAA	::::: : :::: :::::::::	AUCCUUACCCUCCGUAAUCCUU
chr6A:97575802-97576568(+)	741-762	4	osa-miR2118g/zma-miR2118c/	22	UAGGAUUCGGAGACAUUAGGAA	::::: : :::: :::::::::	AUCCUUACCCUCCGUAAUCCUU
chr6B:100298575-100299113(-)	448-469	4	osa-miR2118g/zma-miR2118c/	22	UCGGCUUGGGAGGCAUUGGGAA	: :: :::::::::::.::::	AUCCUUACCCUCCGUAAUCCUU
chr6B:102066838-102067335(+)	469-490	3	zma-miR2118g/	22	UAGGCAUAGGAGGCACCAGGAA	:::: :::::::::: ::::::	AUCCUUAUCCUCCGUAGUCCUU
chr6B:124992042-124992725(-)	593-614	1	zma-miR2118g/	22	UAGGAAUAGGAGGCAUCAGGAU	:::::::::::::::::::::	AUCCUUAUCCUCCGUAGUCCUU
chr6B:124992042-124992725(-)	593-614	4	osa-miR2118g/zma-miR2118c/	22	UAGGAAUAGGAGGCAUCAGGAU	::::::: :::::::: ::::	AUCCUUACCCUCCGUAAUCCUU
chr6B:125341631-125342421(-)	700-721	3	zma-miR2118g/	22	UAGGAAUAGGAGCCAUCAGGAU	:::::::::::: ::::::::	AUCCUUAUCCUCCGUAGUCCUU
chr6B:125346311-125347057(-)	679-700	3.5	zma-miR2118g/	22	UAGAAAUAGGAGCCAUCAGGAG	::: :::::::: ::::::::.	AUCCUUAUCCUCCGUAGUCCUU
chr6B:125360533-125361112(-)	491-512	3.5	zma-miR2118g/	22	UAGGAAUAGGAGUCGUCAGGAG	:::::::::::: :.::::::.	AUCCUUAUCCUCCGUAGUCCUU
chr6B:154275047-154275901(+)	785-806	4	osa-miR2118g/zma-miR2118c/	22	UAGGAUUUGGAGACAUUAGGAA	::::: : :::: :::::::::	AUCCUUACCCUCCGUAAUCCUU
chr6B:154833141-154834043(+)	740-761	3	osa-miR2118g/zma-miR2118c/	22	UAGGAAUCGGAGACAUUAGGAA	::::::: :::: :::::::::	AUCCUUACCCUCCGUAAUCCUU
chr6B:154833141-154834043(+)	740-761	4	zma-miR2118g/	22	UAGGAAUCGGAGACAUUAGGAA	::::::: :::: :::.:::::	AUCCUUAUCCUCCGUAGUCCUU
chr6B:155196046-155196802(+)	666-687	3	osa-miR2118g/zma-miR2118c/	22	UAGGAAUUGGAGACAUUAGGAA	::::::: :::: :::::::::	AUCCUUACCCUCCGUAAUCCUU
chr6B:155196046-155196802(+)	666-687	4	zma-miR2118g/	22	UAGGAAUUGGAGACAUUAGGAA	::::::: :::: :::.:::::	AUCCUUAUCCUCCGUAGUCCUU
chr6B:155198869-155199344(+)	385-406	2	osa-miR2118g/zma-miR2118c/	22	UAGGAUUUGGAGGCAUUAGGAA	::::: : ::::::::::::::	AUCCUUACCCUCCGUAAUCCUU
chr6B:155198869-155199344(+)	385-406	3	zma-miR2118g/	22	UAGGAUUUGGAGGCAUUAGGAA	::::: : ::::::::.:::::	AUCCUUAUCCUCCGUAGUCCUU
chr6B:155332721-155333404(+)	593-614	2	osa-miR2118g/zma-miR2118c/	22	UUGGAAUAGGAGGCAUUAGGAA	: ::::: ::::::::::::::	AUCCUUACCCUCCGUAAUCCUU
chr6B:155332721-155333404(+)	593-614	2	zma-miR2118g/	22	UUGGAAUAGGAGGCAUUAGGAA	: ::::::::::::::.:::::	AUCCUUAUCCUCCGUAGUCCUU
chr6B:33476512-33477132(+)	532-553	3.5	zma-miR2118g/	22	UGGGAAUAUGAGGCAUCUGGAA	:.:::::: :::::::: ::::	AUCCUUAUCCUCCGUAGUCCUU
chr6B:42739126-42739668(-)	473-494	1.5	zma-miR2118g/	22	UGAGAAUAGGAGGCAUCAGGAA	:. :::::::::::::::::::	AUCCUUAUCCUCCGUAGUCCUU
chr6B:623338670-623339564(-)	784-805	3	zma-miR2118g/	22	UAGGGAUGAGAGGUAUCAGGAA	::::.::. ::::.::::::::	AUCCUUAUCCUCCGUAGUCCUU
chr6B:623441573-623442235(-)	553-574	4	osa-miR2118g/zma-miR2118c/	22	UAGGCAUGAGAGGCAUGAGGAA	:::: ::: ::::::: :::::	AUCCUUACCCUCCGUAAUCCUU
chr6B:648044706-648045473(-)	719-740	4	zma-miR2118g/	22	UAGGAGUUGGAAGCAUCAGGAG	:::::.: ::: :::::::::.	AUCCUUAUCCUCCGUAGUCCUU
chr6B:665671031-665671775(-)	635-656	3	zma-miR2118g/	22	UAGGCAUAGAAGGCAUCAGGAA	:::: :::: ::::::::::::	AUCCUUAUCCUCCGUAGUCCUU
chr6B:715178013-715178718(-)	617-638	3	osa-miR2118g/zma-miR2118c/	22	UAGCUUUGGGAGGCAUUAGGAA	::: ::::::::::::::::	AUCCUUACCCUCCGUAAUCCUU
chr6B:716677857-716678849(-)	422-443	4	zma-miR2118g/	22	AGGGAACGGGAGGCAUCGGGAA	.:::: .:::::::::.::::	AUCCUUAUCCUCCGUAGUCCUU
chr6D:25488441-25489059(-)	493-513	4	zma-miR2118g/	22	UAG-AAUAGGAGACAUCAGGAU	::: :::::::: ::::::::	AUCCUUAUCCUCCGUAGUCCUU
chr6D:429804028-429804480(-)	362-383	4	zma-miR2118g/	22	UAGGACUAGGAAGCAUCAGGAU	::::: ::::: :::::::::	AUCCUUAUCCUCCGUAGUCCUU
chr6D:468951213-468951796(-)	493-514	2	osa-miR2118g/zma-miR2118c/	22	UAGGUUUGGGAGGCAUUAGGAA	:::: ::::::::::::::::	AUCCUUACCCUCCGUAAUCCUU
chr6D:468951213-468951796(-)	493-514	3.5	zma-miR2118g/	22	UAGGUUUGGGAGGCAUUAGGAA	:::: :.::::::::.:::::	AUCCUUAUCCUCCGUAGUCCUU
chr6D:468992548-468993252(-)	614-635	3	zma-miR2118g/	22	UAGGCAUAGAAGGCAUCAGGAA	:::: :::: ::::::::::::	AUCCUUAUCCUCCGUAGUCCUU
chr6D:46910014-46910720(+)	616-637	1	zma-miR2118g/	22	UAGGAAUAGGAGGCAUCAGGAC	:::::::::::::::::::::	AUCCUUAUCCUCCGUAGUCCUU
chr6D:46910014-46910720(+)	616-637	4	osa-miR2118g/zma-miR2118c/	22	UAGGAAUAGGAGGCAUCAGGAC	::::::: :::::::: ::::	AUCCUUACCCUCCGUAAUCCUU
chr6D:55077096-55078052(-)	887-908	2	zma-miR2118g/	22	UAGGAAUAGGAGCCAUCAGGAA	:::::::::::: :::::::::	AUCCUUAUCCUCCGUAGUCCUU
chr6D:55313764-55314429(-)	575-596	2	zma-miR2118g/	22	UAGGAAUAGGAGACAUCAGGAA	:::::::::::: :::::::::	AUCCUUAUCCUCCGUAGUCCUU
chr6D:55318444-55319169(-)	637-658	4	zma-miR2118g/	22	UAGGAAUAAGAGCCAUCAGGAC	:::::::: ::: ::::::::	AUCCUUAUCCUCCGUAGUCCUU
chr6D:68841430-68842021(+)	500-522	4	osa-miR2118g/zma-miR2118c/	22	UAUGAAUGGAAGGCAUUCAGGAA	:: :::::: ::::::: :::::	AUCCUUACCCUCCGUAA-UCCUU
chr6D:77756900-77757669(-)	679-700	3.5	zma-miR2118g/	22	AGGGAAUAGGAGGCGUCGGGAA	.::::::::::::.::.::::	AUCCUUAUCCUCCGUAGUCCUU
chr6D:80599152-80599751(+)	509-530	3	osa-miR2118g/zma-miR2118c/	22	UAGGAUUGGGAGACAUUAGGAA	::::: :::::: :::::::::	AUCCUUACCCUCCGUAAUCCUU
chr6D:80605905-80606612(+)	617-638	3	zma-miR2118g/	22	UAGGAUUCAGAGGCAUCAGGAA	::::: : :::::::::::::	AUCCUUAUCCUCCGUAGUCCUU
chr6D:81110163-81110806(+)	553-574	2	osa-miR2118g/zma-miR2118c/	22	UAGGAUUUGGAGGCAUUAGGAA	::::: : ::::::::::::::	AUCCUUACCCUCCGUAAUCCUU
chr6D:81110163-81110806(+)	553-574	3	zma-miR2118g/	22	UAGGAUUUGGAGGCAUUAGGAA	::::: : ::::::::.:::::	AUCCUUAUCCUCCGUAGUCCUU
chr6D:81120470-81121029(+)	469-490	3	osa-miR2118g/zma-miR2118c/	22	UAGGAUUUGGAGGCAUUAGGGA	::::: : ::::::::::::.:	AUCCUUACCCUCCGUAAUCCUU
chr6D:81120470-81121029(+)	469-490	4	zma-miR2118g/	22	UAGGAUUUGGAGGCAUUAGGGA	::::: : ::::::::.:::.:	AUCCUUAUCCUCCGUAGUCCUU
chr6D:81171628-81172506(+)	790-811	2	osa-miR2118g/zma-miR2118c/	22	UUGGAAUUGGAGGCAUUAGGAA	: ::::: ::::::::::::::	AUCCUUACCCUCCGUAAUCCUU
chr6D:81171628-81172506(+)	790-811	3	zma-miR2118g/	22	UUGGAAUUGGAGGCAUUAGGAA	: ::::: ::::::::.:::::	AUCCUUAUCCUCCGUAGUCCUU
chr6D:81212090-81212935(+)	818-839	2	osa-miR2118g/zma-miR2118c/	22	UUGGAAUUGGAGGCAUUAGGAA	: ::::: ::::::::::::::	AUCCUUACCCUCCGUAAUCCUU
chr6D:81212090-81212935(+)	818-839	3	zma-miR2118g/	22	UUGGAAUUGGAGGCAUUAGGAA	: ::::: ::::::::.:::::	AUCCUUAUCCUCCGUAGUCCUU
chr7A:112338052-112339027(+)	865-887	3.5	zma-miR2118g/	22	UAGGCAUGGGAGGCAUCAGAGAA	:::: ::.::::::::::: :::	AUCCUUAUCCUCCGUAGUC-CUU
chr7A:112355390-112356302(+)	823-845	3.5	zma-miR2118g/	22	UAGGAAUGGGAGGCAUCGGAGAA	:::::::.:::::::::.: :::	AUCCUUAUCCUCCGUAGUC-CUU
chr7A:112690368-112691076(+)	638-660	4	osa-miR2118g/zma-miR2118c/	22	UAGGCAUGGGAGGCAUUGGAGAA	:::: ::::::::::::.: :::	AUCCUUACCCUCCGUAAUC-CUU
chr7A:12761009-12761797(+)	679-700	3.5	zma-miR2118g/	22	UGAGAAUAGGAGGCAUCUGGAA	:. :::::::::::::: ::::	AUCCUUAUCCUCCGUAGUCCUU
chr7A:14671183-14671889(-)	637-659	4	zma-miR2118g/	22	UGGGGAUUAGGAGGCAUCAAGAA	:.::.:: ::::::::::: :::	AUCCUUA-UCCUCCGUAGUCCUU
chr7A:15125325-15126029(+)	616-637	3	zma-miR2118g/	22	UAUGAUUAGGAGGCAUCGGGAA	:: :: :::::::::::.::::	AUCCUUAUCCUCCGUAGUCCUU
chr7A:175903476-175904012(+)	469-490	4	zma-miR2118g/	22	UAGGGAUGAGAGGCAUCCGGAA	::::.::. :::::::: ::::	AUCCUUAUCCUCCGUAGUCCUU
chr7A:38357904-38358735(+)	762-783	3.5	osa-miR2118g/zma-miR2118c/	22	UGGGAUUGGAAGGCAUUAGGAA	:.::: ::: ::::::::::::	AUCCUUACCCUCCGUAAUCCUU
chr7A:42812696-42813400(+)	637-659	3	zma-miR2118g/	22	UAUGGAAUAAGAGGCAUCGGGAA	:: :::::: ::::::::.::::	AU-CCUUAUCCUCCGUAGUCCUU
chr7A:461898592-461899330(+)	628-649	4	zma-miR2118g/	22	UGGGGAUAAGAGGUGUCAGGAA	:.::.::: ::::..:::::::	AUCCUUAUCCUCCGUAGUCCUU
chr7A:54931537-54932113(+)	467-488	4	osa-miR2118g/zma-miR2118c/	22	UAGGCUUGGGAGGCAUUGGGGA	:::: :::::::::::.::.:	AUCCUUACCCUCCGUAAUCCUU
chr7A:581849053-581849652(+)	490-511	4	zma-miR2118g/	22	UAGGAAAAGGGGGCAUCUGGAA	:::::: :::.:::::: ::::	AUCCUUAUCCUCCGUAGUCCUU
chr7A:581946408-581947051(+)	553-574	3	zma-miR2118g/	22	UAGGAAAAGGAGGCAUCUGGAA	:::::: :::::::::: ::::	AUCCUUAUCCUCCGUAGUCCUU
chr7A:624822198-624822694(-)	427-448	3.5	zma-miR2118g/	22	UGGGAAUAGGAGGUAGCAGGAA	:.:::::::::::.: ::::::	AUCCUUAUCCUCCGUAGUCCUU
chr7A:624937200-624937734(-)	425-446	4	zma-miR2118g/	22	UGGGAGUAGGAGGUAGCAGGAA	:.:::.:::::::.: ::::::	AUCCUUAUCCUCCGUAGUCCUU
chr7A:647303083-647303684(-)	511-532	3	osa-miR2118g/zma-miR2118c/	22	UAGGCAUGAGAGGUAUUAGGAA	:::: ::: ::::.::::::::	AUCCUUACCCUCCGUAAUCCUU
chr7A:652519104-652520053(-)	840-861	4	osa-miR2118g/zma-miR2118c/	22	UCGGCAUGGGAGGUAUUAGGAU	: :: ::::::::.:::::::	AUCCUUACCCUCCGUAAUCCUU
chr7A:664098992-664099782(-)	700-721	4	zma-miR2118g/	22	UAAGAAUAGGAUGCAUCGGGAA	:: :::::::: :::::.::::	AUCCUUAUCCUCCGUAGUCCUU
chr7A:690067896-690068558(-)	572-593	4	osa-miR2118g/zma-miR2118c/	22	UAGACAUGGGAAGCAUUAGGAA	::: :::::: ::::::::::	AUCCUUACCCUCCGUAAUCCUU
chr7A:690071495-690072202(-)	616-637	2	osa-miR2118g/zma-miR2118c/	22	UAGAUAUGGGAGGCAUUAGGAA	::: :::::::::::::::::	AUCCUUACCCUCCGUAAUCCUU
chr7A:690071495-690072202(-)	616-637	3.5	zma-miR2118g/	22	UAGAUAUGGGAGGCAUUAGGAA	::: ::.::::::::.:::::	AUCCUUAUCCUCCGUAGUCCUU
chr7B:11084292-11085082(+)	702-723	3	zma-miR2118g/	22	UGAGAGUAGGAGGCAUCGGGAA	:. ::.:::::::::::.::::	AUCCUUAUCCUCCGUAGUCCUU
chr7B:138661193-138661750(+)	469-490	3	zma-miR2118g/	22	UAGGACUAGGAGGCAUCAAGAA	::::: :::::::::::: :::	AUCCUUAUCCUCCGUAGUCCUU
chr7B:138718112-138718762(+)	581-602	4	zma-miR2118g/	22	UAGGGCUGAGAGGCAUCGGGAA	::::. :. ::::::::.::::	AUCCUUAUCCUCCGUAGUCCUU
chr7B:412818208-412818893(+)	595-616	2.5	zma-miR2118g/	22	UGGGCAUAAGAGGCAUCAGGAA	:.:: ::: :::::::::::::	AUCCUUAUCCUCCGUAGUCCUU
chr7B:539786935-539787616(+)	572-593	3	zma-miR2118g/	22	UAGGAAAAGGAGGCAUCCGGAA	:::::: :::::::::: ::::	AUCCUUAUCCUCCGUAGUCCUU
chr7B:539859472-539860246(+)	635-656	3	zma-miR2118g/	22	UAGGAAAAGGAGGCAUCUGGAA	:::::: :::::::::: ::::	AUCCUUAUCCUCCGUAGUCCUU
chr7B:539863114-539864091(+)	908-929	3	zma-miR2118g/	22	UAGGAAAAGGAGGCAUCUGGAA	:::::: :::::::::: ::::	AUCCUUAUCCUCCGUAGUCCUU
chr7B:58537158-58537718(-)	406-427	4	zma-miR2118g/	22	UAGGAAUAGGAUGCAUCAAGAA	::::::::::: :::::: :::	AUCCUUAUCCUCCGUAGUCCUU
chr7B:585958827-585959298(-)	383-404	3.5	osa-miR2118g/zma-miR2118c/	22	UGGGAAUGGGAGGUAGUAGGAA	:.:::::::::::.: ::::::	AUCCUUACCCUCCGUAAUCCUU
chr7B:585983570-585984211(-)	551-572	4	zma-miR2118g/	22	UGGGAGUAGGAGGUAGCAGGAA	:.:::.:::::::.: ::::::	AUCCUUAUCCUCCGUAGUCCUU
chr7B:610097043-610097781(+)	648-669	3	zma-miR2118g/	22	UAGGAGUGGUAGGCAUCAGGAA	:::::.:.: ::::::::::::	AUCCUUAUCCUCCGUAGUCCUU
chr7B:612321743-612322300(+)	488-509	3.5	zma-miR2118g/	22	UCGGCAUGAGAGGCAUCAGGAA	: :: ::. :::::::::::::	AUCCUUAUCCUCCGUAGUCCUU
chr7B:616493294-616493937(-)	553-574	4	zma-miR2118g/	22	UUGGUGUGGGAGGCAUCGGGAA	: :: .:.:::::::::.::::	AUCCUUAUCCUCCGUAGUCCUU
chr7B:633898656-633899339(-)	574-595	2	zma-miR2118g/	22	UAGGAAUAGGAUGCAUCAGGAA	::::::::::: ::::::::::	AUCCUUAUCCUCCGUAGUCCUU
chr7B:633926854-633927495(-)	551-572	3	zma-miR2118g/	22	UAGGAAUAGGGUGCAUCAGGAA	::::::::::. ::::::::::	AUCCUUAUCCUCCGUAGUCCUU
chr7B:65144627-65145186(+)	469-490	3	zma-miR2118g/	22	UAGGACUAGGAGGCAUCAGAAA	::::: ::::::::::::: ::	AUCCUUAUCCUCCGUAGUCCUU
chr7B:65165316-65165853(-)	448-470	4	osa-miR2118g/zma-miR2118c/	22	UAGAAAUGGGAGGCAUUGGAGAA	::: :::::::::::::.: :::	AUCCUUACCCUCCGUAAUC-CUU
chr7B:66413514-66414302(+)	721-742	4	zma-miR2118g/	22	UAGAACUAGGAGGCACCAGGAA	::: : ::::::::: ::::::	AUCCUUAUCCUCCGUAGUCCUU
chr7B:66502728-66503521(+)	698-719	2	osa-miR2118g/zma-miR2118c/	22	UAGGACUGGGAGGCAUUGGGAA	::::: :::::::::::.::::	AUCCUUACCCUCCGUAAUCCUU
chr7B:66502728-66503521(+)	698-719	3.5	zma-miR2118g/	22	UAGGACUGGGAGGCAUUGGGAA	::::: :.::::::::..::::	AUCCUUAUCCUCCGUAGUCCUU
chr7B:675961594-675962434(-)	731-752	3	osa-miR2118g/zma-miR2118c/	22	UAGGUUUGAGAGGCAUUAGGAA	:::: :: :::::::::::::	AUCCUUACCCUCCGUAAUCCUU
chr7B:677639408-677640308(+)	812-833	3.5	osa-miR2118g/zma-miR2118c/	22	UGGAUUUGGGAGGCAUUAGGAA	:.: ::::::::::::::::	AUCCUUACCCUCCGUAAUCCUU
chr7B:677662465-677663281(+)	724-745	2	osa-miR2118g/zma-miR2118c/	22	UAGGCUUGGGAGGCAUUAGGAA	:::: ::::::::::::::::	AUCCUUACCCUCCGUAAUCCUU
chr7B:677662465-677663281(+)	724-745	3.5	zma-miR2118g/	22	UAGGCUUGGGAGGCAUUAGGAA	:::: :.::::::::.:::::	AUCCUUAUCCUCCGUAGUCCUU
chr7B:677767285-677767967(+)	594-615	3	osa-miR2118g/zma-miR2118c/	22	UAGAUUUGGGAGGCAUUAGGAA	::: ::::::::::::::::	AUCCUUACCCUCCGUAAUCCUU
chr7B:67816369-67816949(+)	470-491	4	osa-miR2118g/zma-miR2118c/	22	UAGGAAUGGAAGGCGUUAGGGA	::::::::: ::::.:::::.:	AUCCUUACCCUCCGUAAUCCUU
chr7B:68317837-68318478(+)	574-595	2	osa-miR2118g/zma-miR2118c/	22	UGGGAGUGGGAGGUAUUAGGAA	:.:::.:::::::.::::::::	AUCCUUACCCUCCGUAAUCCUU
chr7D:101437200-101437726(-)	409-430	4	zma-miR2118g/	22	UAGGAAUAGGAUGCAUCAAGAA	::::::::::: :::::: :::	AUCCUUAUCCUCCGUAGUCCUU
chr7D:106918175-106918963(+)	678-700	3.5	zma-miR2118g/	22	UAGGCAUGGGAGGCAUCAGAGAA	:::: ::.::::::::::: :::	AUCCUUAUCCUCCGUAGUC-CUU
chr7D:107583309-107583889(+)	490-511	3.5	zma-miR2118g/	22	UAGAAGUCGGAGGCAUCAGGGA	::: :.: ::::::::::::.:	AUCCUUAUCCUCCGUAGUCCUU
chr7D:108614787-108615382(+)	547-568	4	osa-miR2118g/zma-miR2118c/	22	UAGGAAUGGCAGGCGUUAGGGA	::::::::: ::::.:::::.:	AUCCUUACCCUCCGUAAUCCUU
chr7D:109017157-109017884(+)	658-679	3	osa-miR2118g/zma-miR2118c/	22	UUGGAUUGGGAGGUAUUAGGAA	: ::: :::::::.::::::::	AUCCUUACCCUCCGUAAUCCUU
chr7D:111218759-111219819(+)	972-993	3	zma-miR2118g/	22	UAAGAAUAGGAGACAUCAGGAA	:: ::::::::: :::::::::	AUCCUUAUCCUCCGUAGUCCUU
chr7D:121787464-121787939(+)	427-448	3.5	zma-miR2118g/	22	UAUGAAUGGGAAGCAUCAGGAA	:: ::::.::: ::::::::::	AUCCUUAUCCUCCGUAGUCCUU
chr7D:13408639-13409194(+)	446-467	3.5	zma-miR2118g/	22	UGAGAAUAGGAGACAUCAGGAA	:. ::::::::: :::::::::	AUCCUUAUCCUCCGUAGUCCUU
chr7D:13744477-13745269(+)	596-617	4	zma-miR2118g/	22	UACGAAUAGGAGACGUCAGGAA	:: ::::::::: :.:::::::	AUCCUUAUCCUCCGUAGUCCUU
chr7D:15023507-15024087(-)	490-511	4	zma-miR2118g/	22	GGGGAGUAGGAGGCAUCGGGAC	.:::.:::::::::::.:::	AUCCUUAUCCUCCGUAGUCCUU
chr7D:15161804-15162415(-)	532-553	3.5	zma-miR2118g/	22	AGGGAAUAGAAGGCAUCAGGAA	.::::::: ::::::::::::	AUCCUUAUCCUCCGUAGUCCUU
chr7D:15494000-15494683(-)	595-616	3.5	zma-miR2118g/	22	CAGGGUUAGGAGGUAUCAGGAA	:::. :::::::.::::::::	AUCCUUAUCCUCCGUAGUCCUU
chr7D:173919967-173920503(+)	467-488	4	zma-miR2118g/	22	UAGGGCUGAGAGGCAUCGGGAA	::::. :. ::::::::.::::	AUCCUUAUCCUCCGUAGUCCUU
chr7D:30481923-30482459(+)	448-469	4	zma-miR2118g/	22	UAGGACUAGGAGGCAUAGGGAA	::::: :::::::::: .::::	AUCCUUAUCCUCCGUAGUCCUU
chr7D:35547656-35548222(-)	457-478	2.5	zma-miR2118g/	22	AGGGAAUGGGAGGCAUCAGGAG	.:::::.:::::::::::::.	AUCCUUAUCCUCCGUAGUCCUU
chr7D:35547656-35548222(-)	457-478	4	osa-miR2118g/zma-miR2118c/	22	AGGGAAUGGGAGGCAUCAGGAG	.:::::::::::::: ::::.	AUCCUUACCCUCCGUAAUCCUU
chr7D:36464480-36465165(-)	616-637	4	osa-miR2118g/zma-miR2118c/	22	UGGGAGUGGGAGACAUUGGGAA	:.:::.:::::: ::::.::::	AUCCUUACCCUCCGUAAUCCUU
chr7D:38631536-38632116(+)	490-511	4	zma-miR2118g/	22	UGGGAAUACGAGACAUCAGGAG	:.:::::: ::: ::::::::.	AUCCUUAUCCUCCGUAGUCCUU
chr7D:39254830-39255326(-)	406-427	4	osa-miR2118g/zma-miR2118c/	22	UAGGAUUGGGAAGCAUUAGGAU	::::: ::::: :::::::::	AUCCUUACCCUCCGUAAUCCUU
chr7D:39256490-39257042(-)	462-483	4	zma-miR2118g/	22	UAGGACUAGGAAGCAUCAGGAU	::::: ::::: :::::::::	AUCCUUAUCCUCCGUAGUCCUU
chr7D:39498921-39499563(-)	551-572	4	zma-miR2118g/	22	UAGGACUAGGAAGCAUCAGGAU	::::: ::::: :::::::::	AUCCUUAUCCUCCGUAGUCCUU
chr7D:39500287-39500834(-)	457-478	4	zma-miR2118g/	22	UAGGACUAGGAAGCAUCAGGAU	::::: ::::: :::::::::	AUCCUUAUCCUCCGUAGUCCUU
chr7D:39504441-39504913(-)	382-403	4	zma-miR2118g/	22	UAGGACUAGGAAGCAUCAGGAU	::::: ::::: :::::::::	AUCCUUAUCCUCCGUAGUCCUU
chr7D:39520857-39521710(-)	763-784	4	osa-miR2118g/zma-miR2118c/	22	UAGAAAUGGGAGGCAUUGAGAA	::: :::::::::::::. :::	AUCCUUACCCUCCGUAAUCCUU
chr7D:39550940-39551623(-)	574-595	4	osa-miR2118g/zma-miR2118c/	22	UAGAAAUGGAAGGCAUUGGGAA	::: ::::: :::::::.::::	AUCCUUACCCUCCGUAAUCCUU
chr7D:39958416-39959161(+)	636-657	4	zma-miR2118g/	22	UAAGAAUAGGAGGCAUCGGGCA	:: ::::::::::::::.:: :	AUCCUUAUCCUCCGUAGUCCUU
chr7D:41433994-41434845(-)	763-784	4	zma-miR2118g/	22	GAGGAAUACGAGGCAGCAGGAA	::::::: :::::: ::::::	AUCCUUAUCCUCCGUAGUCCUU
chr7D:426778609-426779271(+)	554-574	3	zma-miR2118g/	22	UAAGAAUAGGAGGCAUC-GGAA	:: :::::::::::::: ::::	AUCCUUAUCCUCCGUAGUCCUU
chr7D:44300522-44301015(+)	405-426	3.5	zma-miR2118g/	22	UUGGAAUGGGAGGAAUCAGGAA	: :::::.::::: ::::::::	AUCCUUAUCCUCCGUAGUCCUU
chr7D:511338020-511338535(-)	425-446	4	zma-miR2118g/	22	UAGGAAUAGGAGUCACCAGGAA	:::::::::::: :: ::::::	AUCCUUAUCCUCCGUAGUCCUU
chr7D:53271509-53272003(-)	406-427	3.5	osa-miR2118g/zma-miR2118c/	22	UAGGUGUGAGAGGCAUUAGGGA	:::: .:: :::::::::::.:	AUCCUUACCCUCCGUAAUCCUU
chr7D:53331313-53331952(-)	551-572	3	osa-miR2118g/zma-miR2118c/	22	UAGGAUUGAGAGGCAUUAGGGA	::::: :: :::::::::::.:	AUCCUUACCCUCCGUAAUCCUU
chr7D:541967814-541968455(-)	551-572	3.5	zma-miR2118g/	22	UGGGAAUAGGAGGUAGCAGGAA	:.:::::::::::.: ::::::	AUCCUUAUCCUCCGUAGUCCUU
chr7D:541970990-541971612(-)	532-553	4	zma-miR2118g/	22	UGGGAGUAGGAGGUAGCAGGAA	:.:::.:::::::.: ::::::	AUCCUUAUCCUCCGUAGUCCUU
chr7D:541972365-541973132(-)	721-742	4	zma-miR2118g/	22	UGGGAGUAGGAGGUAGCAGGAA	:.:::.:::::::.: ::::::	AUCCUUAUCCUCCGUAGUCCUU
chr7D:596948698-596949383(-)	595-616	3	osa-miR2118g/zma-miR2118c/	22	UAGAUCUGGGAGGCAUUAGGAA	::: ::::::::::::::::	AUCCUUACCCUCCGUAAUCCUU
chr7D:596985062-596985829(-)	679-700	3	osa-miR2118g/zma-miR2118c/	22	UAGGUUUGAGAGGCAUUAGGAA	:::: :: :::::::::::::	AUCCUUACCCUCCGUAAUCCUU
chr7D:597122522-597123102(-)	490-511	2	osa-miR2118g/zma-miR2118c/	22	UAGAUAUGGGAGGCAUUAGGAA	::: :::::::::::::::::	AUCCUUACCCUCCGUAAUCCUU
chr7D:597122522-597123102(-)	490-511	3.5	zma-miR2118g/	22	UAGAUAUGGGAGGCAUUAGGAA	::: ::.::::::::.:::::	AUCCUUAUCCUCCGUAGUCCUU
chr7D:597160279-597160813(-)	425-446	3	osa-miR2118g/zma-miR2118c/	22	UAGAUUUGGGAGGCAUUAGGAA	::: ::::::::::::::::	AUCCUUACCCUCCGUAAUCCUU
chr7D:597178437-597178975(-)	469-490	2	osa-miR2118g/zma-miR2118c/	22	UAGAUAUGGGAGGCAUUAGGAA	::: :::::::::::::::::	AUCCUUACCCUCCGUAAUCCUU
chr7D:597178437-597178975(-)	469-490	3.5	zma-miR2118g/	22	UAGAUAUGGGAGGCAUUAGGAA	::: ::.::::::::.:::::	AUCCUUAUCCUCCGUAGUCCUU
chr7D:598147516-598148201(-)	616-637	3	osa-miR2118g/zma-miR2118c/	22	UAGAUUUGGGAGGCAUUAGGAA	::: ::::::::::::::::	AUCCUUACCCUCCGUAAUCCUU
chr7D:598181457-598182181(-)	656-677	3	osa-miR2118g/zma-miR2118c/	22	UAGGUUUGAGAGGCAUUAGGAA	:::: :: :::::::::::::	AUCCUUACCCUCCGUAAUCCUU
chr7D:598261035-598261783(-)	679-700	3	osa-miR2118g/zma-miR2118c/	22	UAGAUUUGGGAGGCAUUAGGAA	::: ::::::::::::::::	AUCCUUACCCUCCGUAAUCCUU
chr7D:598497314-598497944(+)	509-530	3	osa-miR2118g/zma-miR2118c/	22	UAGAUUUGGGAGGCAUUAGGAA	::: ::::::::::::::::	AUCCUUACCCUCCGUAAUCCUU
chr7D:598523375-598524209(+)	742-763	3	osa-miR2118g/zma-miR2118c/	22	UAGAUUUGGGAGGCAUUAGGAA	::: ::::::::::::::::	AUCCUUACCCUCCGUAAUCCUU
chrUn:67114691-67115248(-)	448-469	4	osa-miR2118g/zma-miR2118c/	22	UGAGGAUGGGAGGUGUUAGGAA	:. :.::::::::..:::::::	AUCCUUACCCUCCGUAAUCCUU
chrUn:70302439-70302963(+)	436-457	4	zma-miR2118g/	22	UAUGCAUAGGAGGCACCAGGAA	:: : :::::::::: ::::::	AUCCUUAUCCUCCGUAGUCCUU
chrUn:92630812-92631455(-)	553-574	2	zma-miR2118g/	22	UAGGAAUAGGAUGCAUCAGGAA	::::::::::: ::::::::::	AUCCUUAUCCUCCGUAGUCCUU
chrUn:93716864-93717440(+)	467-488	4	zma-miR2118g/	22	UGAGAAUAGGAGACAUCAGGAG	:. ::::::::: ::::::::.	AUCCUUAUCCUCCGUAGUCCUU
chr1A:22984566-22985320(-)	687-708	3	osa-miR2118h/osa-miR2118k/zma-miR2118a/	22	UAGAAAUGAGAGGAAUCAGGAA	::: ::::::::: ::::::::	AUCCUUACUCUCCGUAGUCCUU
chr1A:347633014-347633603(-)	520-541	3.5	osa-miR2118h/osa-miR2118k/zma-miR2118a/	22	UAGGGAUGAGGGGCGUCGGGAA	::::.:::::.:::.::.::::	AUCCUUACUCUCCGUAGUCCUU
chr1A:438659065-438659854(+)	699-720	3.5	osa-miR2118h/osa-miR2118k/zma-miR2118a/	22	UGGGAAUUAGAGGCAUCAUGAA	:.::::: :::::::::: :::	AUCCUUACUCUCCGUAGUCCUU
chr1A:438663588-438664334(+)	637-658	3.5	osa-miR2118h/osa-miR2118k/zma-miR2118a/	22	UGGGCAUCAGAGGCAUCGGGAA	:.:: :: :::::::::.::::	AUCCUUACUCUCCGUAGUCCUU
chr1A:494189370-494189951(-)	462-483	3.5	osa-miR2118h/osa-miR2118k/zma-miR2118a/	22	UUGGAAUGGGAGGCAUCAGAAA	: ::::::.:::::::::: ::	AUCCUUACUCUCCGUAGUCCUU
chr1A:513460254-513460843(+)	499-520	3.5	osa-miR2118h/osa-miR2118k/zma-miR2118a/	22	UGGGAAUGAGAUGCAUUAGGAA	:.::::::::: ::::.:::::	AUCCUUACUCUCCGUAGUCCUU
chr1A:513621626-513622261(+)	490-511	3.5	osa-miR2118h/osa-miR2118k/zma-miR2118a/	22	UGGGAAUGAGAUGCAUUAGGAA	:.::::::::: ::::.:::::	AUCCUUACUCUCCGUAGUCCUU
chr1A:520433240-520434332(-)	1002-1023	3	osa-miR2118h/osa-miR2118k/zma-miR2118a/	22	UAGGCAUAUGAGGCAUCAGGAA	:::: :: :::::::::::::	AUCCUUACUCUCCGUAGUCCUU
chr1A:543381012-543381591(-)	489-510	4	osa-miR2118h/osa-miR2118k/zma-miR2118a/	22	UAGGAUUUAGAGGCAUAAGGAA	::::: : :::::::: :::::	AUCCUUACUCUCCGUAGUCCUU
chr1A:543386158-543386715(-)	488-509	4	osa-miR2118h/osa-miR2118k/zma-miR2118a/	22	UAGGGAUUGGAAGCAUCAGGAA	::::.:: .:: ::::::::::	AUCCUUACUCUCCGUAGUCCUU
chr1A:543486570-543487146(-)	467-488	4	osa-miR2118h/osa-miR2118k/zma-miR2118a/	22	UAGGAUUUAGACGCAUCAGGAA	::::: : ::: ::::::::::	AUCCUUACUCUCCGUAGUCCUU
chr1B:529430736-529431713(-)	908-929	4	osa-miR2118h/osa-miR2118k/zma-miR2118a/	22	UAGGCAUAAGAGGCACCAGGAA	:::: :: ::::::: ::::::	AUCCUUACUCUCCGUAGUCCUU
chr1B:562372755-562373549(+)	685-706	3.5	osa-miR2118h/osa-miR2118k/zma-miR2118a/	22	UGGGAAUGAGAUGCAUUAGGAA	:.::::::::: ::::.:::::	AUCCUUACUCUCCGUAGUCCUU
chr1B:566022243-566022863(+)	530-551	4	osa-miR2118h/osa-miR2118k/zma-miR2118a/	22	GGGGAAUGGGAGGCAUCAAGAA	.::::::.::::::::: :::	AUCCUUACUCUCCGUAGUCCUU
chr1B:573753723-573754323(-)	509-530	3.5	osa-miR2118h/osa-miR2118k/zma-miR2118a/	22	UGGGCAUAUGAGGCAUCAGGAA	:.:: :: :::::::::::::	AUCCUUACUCUCCGUAGUCCUU
chr1B:592051642-592052437(-)	707-728	4	osa-miR2118h/osa-miR2118k/zma-miR2118a/	22	UAGGAAUGAGCGGCAUUGGGAA	:::::::::: :::::..::::	AUCCUUACUCUCCGUAGUCCUU
chr1B:592210676-592211359(-)	593-614	3.5	osa-miR2118h/osa-miR2118k/zma-miR2118a/	22	UCGGGAUGAGAGGCAUUGGGAA	: ::.:::::::::::..::::	AUCCUUACUCUCCGUAGUCCUU
chr1B:612988592-612989109(-)	448-469	2	osa-miR2118h/osa-miR2118k/zma-miR2118a/	22	UAGGAUUUAGAGGCAUCAGGAA	::::: : ::::::::::::::	AUCCUUACUCUCCGUAGUCCUU
chr1B:640481384-640481866(-)	392-413	3.5	osa-miR2118h/osa-miR2118k/zma-miR2118a/	22	UAGGCAUAGGGGGCAUCAGGAA	:::: :: .:.:::::::::::	AUCCUUACUCUCCGUAGUCCUU
chr1D:15624125-15624751(-)	538-559	3.5	osa-miR2118h/osa-miR2118k/zma-miR2118a/	22	UGGGAUUGAGAGGCAUUAGGAU	:.::: ::::::::::.::::	AUCCUUACUCUCCGUAGUCCUU
chr1D:415460637-415461218(+)	491-512	3.5	osa-miR2118h/osa-miR2118k/zma-miR2118a/	22	UCGAAAUAGGAGGCAUCAGGAA	: : ::: .:::::::::::::	AUCCUUACUCUCCGUAGUCCUU
chr1D:416037693-416038446(+)	644-665	3.5	osa-miR2118h/osa-miR2118k/zma-miR2118a/	22	UGGGAAUGAGAUGCAUUAGGAA	:.::::::::: ::::.:::::	AUCCUUACUCUCCGUAGUCCUU
chr1D:416096690-416097380(+)	579-600	3.5	osa-miR2118h/osa-miR2118k/zma-miR2118a/	22	UGGGAAUGAGAUGCAUUAGGAA	:.::::::::: ::::.:::::	AUCCUUACUCUCCGUAGUCCUU
chr1D:418644279-418645104(-)	756-777	4	osa-miR2118h/osa-miR2118k/zma-miR2118a/	22	UGAGAGUGAGAGGCAUUGGGAA	:. ::.::::::::::..::::	AUCCUUACUCUCCGUAGUCCUU
chr1D:424538057-424538625(-)	478-499	3.5	osa-miR2118h/osa-miR2118k/zma-miR2118a/	22	UGGGCAUAUGAGGCAUCAGGAA	:.:: :: :::::::::::::	AUCCUUACUCUCCGUAGUCCUU
chr1D:424596718-424597425(-)	617-638	3	osa-miR2118h/osa-miR2118k/zma-miR2118a/	22	UAGGCAUAUGAGGCAUCAGGAA	:::: :: :::::::::::::	AUCCUUACUCUCCGUAGUCCUU
chr1D:437547057-437547676(+)	531-552	3	osa-miR2118h/osa-miR2118k/zma-miR2118a/	22	UUGGAAUGAGAGGCAUUGGGAA	: ::::::::::::::..::::	AUCCUUACUCUCCGUAGUCCUU
chr1D:438028805-438029449(+)	554-575	3	osa-miR2118h/osa-miR2118k/zma-miR2118a/	22	UAGGAACGAGAGGCAUUGGGAA	:::::: :::::::::..::::	AUCCUUACUCUCCGUAGUCCUU
chr1D:439125865-439126685(-)	711-732	4	osa-miR2118h/osa-miR2118k/zma-miR2118a/	22	UAGGAAUAUGAGGCACCAGGAA	::::::: :::::: ::::::	AUCCUUACUCUCCGUAGUCCUU
chr1D:441289318-441289835(-)	427-448	4	osa-miR2118h/osa-miR2118k/zma-miR2118a/	22	UAGGAAUGAGAGGAAUCAGAAA	::::::::::::: ::::: ::	AUCCUUACUCUCCGUAGUCCUU
chr1D:447318701-447319218(-)	427-448	4	osa-miR2118h/osa-miR2118k/zma-miR2118a/	22	UAGGAUUUAGAGGCAUUAGGAU	::::: : ::::::::.::::	AUCCUUACUCUCCGUAGUCCUU
chr1D:447397540-447398179(-)	572-593	4	osa-miR2118h/osa-miR2118k/zma-miR2118a/	22	UAGGAUUUAGAGGCAUAAGGAA	::::: : :::::::: :::::	AUCCUUACUCUCCGUAGUCCUU
chr1D:447460418-447461082(-)	574-595	2	osa-miR2118h/osa-miR2118k/zma-miR2118a/	22	UAGGAUUUAGAGGCAUCAGGAA	::::: : ::::::::::::::	AUCCUUACUCUCCGUAGUCCUU
chr1D:447465705-447466404(-)	629-650	4	osa-miR2118h/osa-miR2118k/zma-miR2118a/	22	UAGGGAUUGGAAGCAUCAGGAA	::::.:: .:: ::::::::::	AUCCUUACUCUCCGUAGUCCUU
chr1D:447521191-447521750(-)	490-511	2	osa-miR2118h/osa-miR2118k/zma-miR2118a/	22	UAGGAUUUAGAGGCAUCAGGAA	::::: : ::::::::::::::	AUCCUUACUCUCCGUAGUCCUU
chr1D:490522303-490522863(-)	427-447	3.5	osa-miR2118h/osa-miR2118k/zma-miR2118a/	22	UAGGA-UGGGUGGCAUCAGGAA	::::: ::.: :::::::::::	AUCCUUACUCUCCGUAGUCCUU
chr2A:20956413-20956908(+)	405-426	4	osa-miR2118h/osa-miR2118k/zma-miR2118a/	22	UGAGUAUGUGAGGCAUCAGGAG	:. : ::: ::::::::::::.	AUCCUUACUCUCCGUAGUCCUU
chr2B:2697037-2697599(+)	472-493	3	osa-miR2118h/osa-miR2118k/zma-miR2118a/	22	UAGGAACGAGAGGUAUUAGGAA	:::::: ::::::.::.:::::	AUCCUUACUCUCCGUAGUCCUU
chr2B:690599585-690600207(+)	532-553	4	osa-miR2118h/osa-miR2118k/zma-miR2118a/	22	UAAGAGUAGGAGGCAUCGGGAA	:: ::.: .::::::::.::::	AUCCUUACUCUCCGUAGUCCUU
chr2D:21426356-21426889(-)	446-467	3	osa-miR2118h/osa-miR2118k/zma-miR2118a/	22	UAGGACUGAGAGGCGUUAGGAA	::::: ::::::::.:.:::::	AUCCUUACUCUCCGUAGUCCUU
chr2D:598886546-598886998(-)	362-383	2.5	osa-miR2118h/osa-miR2118k/zma-miR2118a/	22	UAGGAAUGGGAGGUGUCAGGAA	::::::::.::::..:::::::	AUCCUUACUCUCCGUAGUCCUU
chr2D:598893208-598893648(-)	350-371	3.5	osa-miR2118h/osa-miR2118k/zma-miR2118a/	22	UAGGAAUGGGAGGUGUCAGGAU	::::::::.::::..::::::	AUCCUUACUCUCCGUAGUCCUU
chr2D:6932604-6933353(-)	659-680	3	osa-miR2118h/osa-miR2118k/zma-miR2118a/	22	UAGGAACGAGAGGUAUUAGGAA	:::::: ::::::.::.:::::	AUCCUUACUCUCCGUAGUCCUU
chr2D:6948036-6948679(-)	553-574	3	osa-miR2118h/osa-miR2118k/zma-miR2118a/	22	UAGGAACGAGAGGUAUUAGGAA	:::::: ::::::.::.:::::	AUCCUUACUCUCCGUAGUCCUU
chr3A:14080005-14080479(-)	365-386	4	osa-miR2118h/osa-miR2118k/zma-miR2118a/	22	UGGGAAUAGGAGGCUUCAGGAA	:.::::: .::::: :::::::	AUCCUUACUCUCCGUAGUCCUU
chr3A:23194240-23195007(+)	677-698	1.5	osa-miR2118h/osa-miR2118k/zma-miR2118a/	22	GAGGAAUGAGAGGCAUCAGGAG	::::::::::::::::::::.	AUCCUUACUCUCCGUAGUCCUU
chr3A:23307538-23308114(+)	488-509	4	osa-miR2118h/osa-miR2118k/zma-miR2118a/	22	UAGGCUUGAGAGGUAUCAGGAC	:::: :::::::.:::::::	AUCCUUACUCUCCGUAGUCCUU
chr3A:27853925-27854569(-)	575-596	4	osa-miR2118h/osa-miR2118k/zma-miR2118a/	22	UAGGAGUUGGAGGCAUCAGAAA	:::::.: .:::::::::: ::	AUCCUUACUCUCCGUAGUCCUU
chr3A:28441608-28442289(-)	593-614	4	osa-miR2118h/osa-miR2118k/zma-miR2118a/	22	UAGGAGUUGGAGUCAUCAGGAA	:::::.: .::: :::::::::	AUCCUUACUCUCCGUAGUCCUU
chr3A:30144670-30145100(+)	362-383	3.5	osa-miR2118h/osa-miR2118k/zma-miR2118a/	22	UGGGGAUGGGAGGCUUCAGGAA	:.::.:::.::::: :::::::	AUCCUUACUCUCCGUAGUCCUU
chr3A:478201-478842(-)	532-553	3.5	osa-miR2118h/osa-miR2118k/zma-miR2118a/	22	UCGGCUUGGGAGGCAUCAGGAA	: :: ::.:::::::::::::	AUCCUUACUCUCCGUAGUCCUU
chr3A:654398707-654399453(-)	677-698	4	osa-miR2118h/osa-miR2118k/zma-miR2118a/	22	UAGGACUGCGAGGUGUCAGGAA	::::: :: ::::..:::::::	AUCCUUACUCUCCGUAGUCCUU
chr3A:710261365-710262163(-)	708-729	3.5	osa-miR2118h/osa-miR2118k/zma-miR2118a/	22	UAGGAAUGUGAGACAUCAGGAG	:::::::: ::: ::::::::.	AUCCUUACUCUCCGUAGUCCUU
chr3B:20024349-20024991(-)	533-554	4	osa-miR2118h/osa-miR2118k/zma-miR2118a/	22	GAGGCAUGAGAGGUAUCAGGAC	::: ::::::::.:::::::	AUCCUUACUCUCCGUAGUCCUU
chr3B:20062997-20064010(-)	905-926	3.5	osa-miR2118h/osa-miR2118k/zma-miR2118a/	22	CAGGAUUGAGAGGUAUCAGGAG	:::: :::::::.:::::::.	AUCCUUACUCUCCGUAGUCCUU
chr3B:20071799-20072379(-)	472-493	1.5	osa-miR2118h/osa-miR2118k/zma-miR2118a/	22	GAGGAAUGAGAGGCAUCAGGAG	::::::::::::::::::::.	AUCCUUACUCUCCGUAGUCCUU
chr3B:20089878-20090749(-)	805-826	3.5	osa-miR2118h/osa-miR2118k/zma-miR2118a/	22	GAGGAAUGAGAGGCAUCAGAAG	:::::::::::::::::: :.	AUCCUUACUCUCCGUAGUCCUU
chr3B:41153000-41153620(-)	530-551	4	osa-miR2118h/osa-miR2118k/zma-miR2118a/	22	UGGAAUUGGGGGGCAUCAGGAA	:.: : ::.:.:::::::::::	AUCCUUACUCUCCGUAGUCCUU
chr3B:683783443-683784189(-)	656-677	3	osa-miR2118h/osa-miR2118k/zma-miR2118a/	22	UAGGACUGCGAGGCGUCAGGAA	::::: :: :::::.:::::::	AUCCUUACUCUCCGUAGUCCUU
chr3B:684064018-684064803(-)	657-678	4	osa-miR2118h/osa-miR2118k/zma-miR2118a/	22	UAGGAUUGCGAGGCGUCGGGAA	::::: :: :::::.::.::::	AUCCUUACUCUCCGUAGUCCUU
chr3B:684104178-684105109(-)	841-862	4	osa-miR2118h/osa-miR2118k/zma-miR2118a/	22	UAGGACUGUGAGGCGUCGGGAA	::::: :: :::::.::.::::	AUCCUUACUCUCCGUAGUCCUU
chr3B:760471119-760471867(-)	658-679	4	osa-miR2118h/osa-miR2118k/zma-miR2118a/	22	UAGGAAUGAGAGGUAUUUGGAA	:::::::::::::.::. ::::	AUCCUUACUCUCCGUAGUCCUU
chr3B:762831487-762832240(+)	664-686	4	osa-miR2118h/osa-miR2118k/zma-miR2118a/	22	UGGGAAUGGGAGGCAUUAAGGAA	:.::::::.:::::::.: ::::	AUCCUUACUCUCCGUAGU-CCUU
chr3B:777812000-777812474(+)	383-404	4	osa-miR2118h/osa-miR2118k/zma-miR2118a/	22	UAGGAGUAGGAGGCAUGAGGAA	:::::.: .::::::: :::::	AUCCUUACUCUCCGUAGUCCUU
chr3D:13600155-13600964(-)	700-721	4	osa-miR2118h/osa-miR2118k/zma-miR2118a/	22	UAGGCUUGAGAGGUAUCAGGAC	:::: :::::::.:::::::	AUCCUUACUCUCCGUAGUCCUU
chr3D:13710008-13710653(-)	576-597	3.5	osa-miR2118h/osa-miR2118k/zma-miR2118a/	22	GAGGAUUGAGAGGUAUCAGGAG	:::: :::::::.:::::::.	AUCCUUACUCUCCGUAGUCCUU
chr3D:13813227-13813910(-)	595-616	2	osa-miR2118h/osa-miR2118k/zma-miR2118a/	22	GAGGGAUGAGAGGCAUCAGGAG	:::.::::::::::::::::.	AUCCUUACUCUCCGUAGUCCUU
chr3D:20035192-20035811(-)	519-540	3.5	osa-miR2118h/osa-miR2118k/zma-miR2118a/	22	UAGGAAUUGGAGGCAUCAGAAA	::::::: .:::::::::: ::	AUCCUUACUCUCCGUAGUCCUU
chr3D:20320504-20321145(-)	572-593	3.5	osa-miR2118h/osa-miR2118k/zma-miR2118a/	22	UAGGAAUUGGAGGCAUCAGAAA	::::::: .:::::::::: ::	AUCCUUACUCUCCGUAGUCCUU
chr3D:20815494-20816114(-)	532-553	4	osa-miR2118h/osa-miR2118k/zma-miR2118a/	22	UAGGAGUUGGAGUCAUCAGGAA	:::::.: .::: :::::::::	AUCCUUACUCUCCGUAGUCCUU
chr3D:20895270-20895995(-)	637-658	4	osa-miR2118h/osa-miR2118k/zma-miR2118a/	22	UAGGAGUUGGAAGCAUCAGGAA	:::::.: .:: ::::::::::	AUCCUUACUCUCCGUAGUCCUU
chr3D:24126845-24127516(+)	583-604	3.5	osa-miR2118h/osa-miR2118k/zma-miR2118a/	22	UAGGAAAAGGAGGCAUCGGGAA	:::::: .::::::::.::::	AUCCUUACUCUCCGUAGUCCUU
chr3D:24614504-24615103(+)	509-530	3	osa-miR2118h/osa-miR2118k/zma-miR2118a/	22	UGGAAUUGGGAGGCAUCAGGAA	:.: : ::.:::::::::::::	AUCCUUACUCUCCGUAGUCCUU
chr3D:535552518-535553077(+)	511-532	3.5	osa-miR2118h/osa-miR2118k/zma-miR2118a/	22	AGGGAAUAUGAGGCAUCAGGAA	.::::: :::::::::::::	AUCCUUACUCUCCGUAGUCCUU
chr3D:580906936-580907552(-)	488-509	4	osa-miR2118h/osa-miR2118k/zma-miR2118a/	22	UAGGAGUAGGAGGCAUGAGGAA	:::::.: .::::::: :::::	AUCCUUACUCUCCGUAGUCCUU
chr3D:580998499-580998991(-)	364-385	4	osa-miR2118h/osa-miR2118k/zma-miR2118a/	22	UAGGAGUAGGAGGCAUGAGGAA	:::::.: .::::::: :::::	AUCCUUACUCUCCGUAGUCCUU
chr3D:581076329-581076891(-)	472-493	4	osa-miR2118h/osa-miR2118k/zma-miR2118a/	22	UAGGAGUAGGAGGCAUGAGGAA	:::::.: .::::::: :::::	AUCCUUACUCUCCGUAGUCCUU
chr4A:541884018-541884729(-)	602-623	3	osa-miR2118h/osa-miR2118k/zma-miR2118a/	22	UAGGAUUGAGAGGAAUCAGGAA	::::: ::::::: ::::::::	AUCCUUACUCUCCGUAGUCCUU
chr4A:583809979-583810494(-)	425-446	4	osa-miR2118h/osa-miR2118k/zma-miR2118a/	22	UUGGAAUGAGCGGCAUCGGGAA	: :::::::: ::::::.::::	AUCCUUACUCUCCGUAGUCCUU
chr4A:597741235-597741834(-)	509-530	3	osa-miR2118h/osa-miR2118k/zma-miR2118a/	22	UAGAAAUGAGAGGCCUCAGGAA	::: :::::::::: :::::::	AUCCUUACUCUCCGUAGUCCUU
chr4A:628005382-628006403(+)	931-952	4	osa-miR2118h/osa-miR2118k/zma-miR2118a/	22	UAGGCUUGAGAGGCAUCAGAAA	:::: ::::::::::::: ::	AUCCUUACUCUCCGUAGUCCUU
chr4A:632785446-632786240(+)	677-698	2.5	osa-miR2118h/osa-miR2118k/zma-miR2118a/	22	UAGCAAUGGGAGGCAUCGGGAA	::: ::::.::::::::.::::	AUCCUUACUCUCCGUAGUCCUU
chr4A:642115747-642116304(-)	467-488	3.5	osa-miR2118h/osa-miR2118k/zma-miR2118a/	22	UAGGAAUCAGAGACAUCAGGAG	::::::: :::: ::::::::.	AUCCUUACUCUCCGUAGUCCUU
chr4A:642407149-642408126(-)	868-889	3.5	osa-miR2118h/osa-miR2118k/zma-miR2118a/	22	UAGGAAUUAGAGACAUCAGGAG	::::::: :::: ::::::::.	AUCCUUACUCUCCGUAGUCCUU
chr4A:642598636-642599444(+)	699-720	4	osa-miR2118h/osa-miR2118k/zma-miR2118a/	22	UAGGAAUCGGAGACAUCAGGAG	::::::: .::: ::::::::.	AUCCUUACUCUCCGUAGUCCUU
chr4A:642689742-642690320(-)	469-490	3.5	osa-miR2118h/osa-miR2118k/zma-miR2118a/	22	UAGGAAUUAGAGACAUCAGGAG	::::::: :::: ::::::::.	AUCCUUACUCUCCGUAGUCCUU
chr4A:648590107-648590663(-)	489-510	3.5	osa-miR2118h/osa-miR2118k/zma-miR2118a/	22	UAGGAAUAGGAGGCAGCAGGAA	::::::: .:::::: ::::::	AUCCUUACUCUCCGUAGUCCUU
chr4A:666505382-666505934(-)	443-464	3	osa-miR2118h/osa-miR2118k/zma-miR2118a/	22	UAGGCCUGAGAGGCAUCAGGGA	:::: ::::::::::::::.:	AUCCUUACUCUCCGUAGUCCUU
chr4A:666934566-666935331(+)	656-677	4	osa-miR2118h/osa-miR2118k/zma-miR2118a/	22	UUGGCUUGAGAGGCAUCAGGGA	: :: ::::::::::::::.:	AUCCUUACUCUCCGUAGUCCUU
chr4A:687348265-687349095(-)	742-763	4	osa-miR2118h/osa-miR2118k/zma-miR2118a/	22	UAGGCUUGAAAGGCAUCAGGAA	:::: ::: ::::::::::::	AUCCUUACUCUCCGUAGUCCUU
chr4A:688964727-688965366(-)	551-572	3.5	osa-miR2118h/osa-miR2118k/zma-miR2118a/	22	UGGGAACCGGAGGCAUCAGGAG	:.:::: .::::::::::::.	AUCCUUACUCUCCGUAGUCCUU
chr4A:694944767-694945452(-)	595-616	2	osa-miR2118h/osa-miR2118k/zma-miR2118a/	22	UAGGAAUUAGAGGCAUCAGGAC	::::::: :::::::::::::	AUCCUUACUCUCCGUAGUCCUU
chr4A:698090756-698091376(-)	511-532	3.5	osa-miR2118h/osa-miR2118k/zma-miR2118a/	22	UAUGACUGGGAGGCAUCGGGAA	:: :: ::.::::::::.::::	AUCCUUACUCUCCGUAGUCCUU
chr4A:698363274-698364022(+)	679-700	4	osa-miR2118h/osa-miR2118k/zma-miR2118a/	22	UAUGACUGAGAGGCAUAAGGAA	:: :: :::::::::: :::::	AUCCUUACUCUCCGUAGUCCUU
chr4A:720959510-720960107(+)	530-551	3.5	osa-miR2118h/osa-miR2118k/zma-miR2118a/	22	UGGGAAUAAGAGGCAUUGGGAA	:.::::: ::::::::..::::	AUCCUUACUCUCCGUAGUCCUU
chr4A:723798928-723799560(-)	542-563	3	osa-miR2118h/osa-miR2118k/zma-miR2118a/	22	UGAGAAUAGGAGGCAUCAGGAA	:. :::: .:::::::::::::	AUCCUUACUCUCCGUAGUCCUU
chr4B:10452475-10453139(+)	574-595	4	osa-miR2118h/osa-miR2118k/zma-miR2118a/	22	UAGAAAUGCGAGGCUUCAGGAA	::: :::: ::::: :::::::	AUCCUUACUCUCCGUAGUCCUU
chr4B:22904940-22905583(-)	553-575	4	osa-miR2118h/osa-miR2118k/zma-miR2118a/	22	UGGGCAUGGGAGGCAUCCAGGAA	:.:: :::.:::::::: :::::	AUCCUUACUCUCCGUAG-UCCUU
chr4B:35210441-35211187(-)	656-677	2.5	osa-miR2118h/osa-miR2118k/zma-miR2118a/	22	UGGGCAUGAGAGGCAUUAGGAA	:.:: :::::::::::.:::::	AUCCUUACUCUCCGUAGUCCUU
chr4B:3583746-3584618(+)	165-186	4	osa-miR2118h/osa-miR2118k/zma-miR2118a/	22	UACGAAUGUGAGGCAUUGGGAA	:: ::::: :::::::..::::	AUCCUUACUCUCCGUAGUCCUU
chr4D:12550357-12551170(-)	722-743	4	osa-miR2118h/osa-miR2118k/zma-miR2118a/	22	UAAGCAUGGGAGGCAUCGGGAG	:: : :::.::::::::.:::.	AUCCUUACUCUCCGUAGUCCUU
chr4D:16670171-16670709(+)	429-450	4	osa-miR2118h/osa-miR2118k/zma-miR2118a/	22	UUGGAAUGAGCGGCAUCGGGAA	: :::::::: ::::::.::::	AUCCUUACUCUCCGUAGUCCUU
chr4D:48535552-48536109(-)	467-488	3.5	osa-miR2118h/osa-miR2118k/zma-miR2118a/	22	UGGGAAUGAGUGGCAUCAGGAU	:.:::::::: ::::::::::	AUCCUUACUCUCCGUAGUCCUU
chr4D:48537039-48537805(-)	657-678	3.5	osa-miR2118h/osa-miR2118k/zma-miR2118a/	22	UGGGAAUGAGUGGCAUCAGGAU	:.:::::::: ::::::::::	AUCCUUACUCUCCGUAGUCCUU
chr5A:11748195-11748688(-)	424-445	4	osa-miR2118h/osa-miR2118k/zma-miR2118a/	22	UAGGAAUGAGAGGGAUUGGGAA	::::::::::::: ::..::::	AUCCUUACUCUCCGUAGUCCUU
chr5A:559089641-559090199(-)	470-491	3.5	osa-miR2118h/osa-miR2118k/zma-miR2118a/	22	UAGGACUGGGAGGCACCAGGAA	::::: ::.:::::: ::::::	AUCCUUACUCUCCGUAGUCCUU
chr5A:567702033-567702529(+)	406-427	3	osa-miR2118h/osa-miR2118k/zma-miR2118a/	22	UAUGAAUGAGAUGCAUCAGGAA	:: :::::::: ::::::::::	AUCCUUACUCUCCGUAGUCCUU
chr5A:601151344-601152294(+)	859-880	4	osa-miR2118h/osa-miR2118k/zma-miR2118a/	22	UAGGAAUGGGAGGCAACGGGAG	::::::::.:::::: :.:::.	AUCCUUACUCUCCGUAGUCCUU
chr5A:601196260-601196984(+)	635-656	4	osa-miR2118h/osa-miR2118k/zma-miR2118a/	22	UAAGAAUGGUAGGCAUCAGGAG	:: :::::. :::::::::::.	AUCCUUACUCUCCGUAGUCCUU
chr5A:601750444-601751150(+)	616-637	2.5	osa-miR2118h/osa-miR2118k/zma-miR2118a/	22	UGGGAAUGAGUGGCAUCAGGAA	:.:::::::: :::::::::::	AUCCUUACUCUCCGUAGUCCUU
chr5A:601822309-601823055(+)	700-721	3.5	osa-miR2118h/osa-miR2118k/zma-miR2118a/	22	UGGUAAUGAGUGGCAUCAGGAA	:.: :::::: :::::::::::	AUCCUUACUCUCCGUAGUCCUU
chr5A:602444328-602445190(+)	793-814	4	osa-miR2118h/osa-miR2118k/zma-miR2118a/	22	UUGAAAUGAGCGGCAUCAGGAA	: : :::::: :::::::::::	AUCCUUACUCUCCGUAGUCCUU
chr5A:607623384-607624111(-)	637-658	3.5	osa-miR2118h/osa-miR2118k/zma-miR2118a/	22	UGGGAAUGAAAGGCAUCGGGAA	:.::::::: :::::::.::::	AUCCUUACUCUCCGUAGUCCUU
chr5B:13814598-13815389(-)	701-722	2.5	osa-miR2118h/osa-miR2118k/zma-miR2118a/	22	UGAGCAUGAGAGGCAUCAGGAA	:. : :::::::::::::::::	AUCCUUACUCUCCGUAGUCCUU
chr5B:14945045-14945729(-)	615-636	4	osa-miR2118h/osa-miR2118k/zma-miR2118a/	22	UAGGAAGGUGAGGUGUCAGGAA	:::::: : ::::..:::::::	AUCCUUACUCUCCGUAGUCCUU
chr5B:539303121-539303675(-)	464-485	2	osa-miR2118h/osa-miR2118k/zma-miR2118a/	22	UAGGGCUGGGAGGCAUCAGGAA	::::. ::.:::::::::::::	AUCCUUACUCUCCGUAGUCCUU
chr5B:545089784-545090518(-)	686-707	4	osa-miR2118h/osa-miR2118k/zma-miR2118a/	22	UAGGCCUGAGAGGCAUCAGAAA	:::: ::::::::::::: ::	AUCCUUACUCUCCGUAGUCCUU
chr5B:547182209-547182746(+)	491-512	4	osa-miR2118h/osa-miR2118k/zma-miR2118a/	22	UUGGAUUGAGAGGCAUCGGGGA	: ::: :::::::::::.::.:	AUCCUUACUCUCCGUAGUCCUU
chr5B:547551694-547552235(+)	451-472	4	osa-miR2118h/osa-miR2118k/zma-miR2118a/	22	UAGGAAUGUGAGGUAUUGGGAA	:::::::: ::::.::..::::	AUCCUUACUCUCCGUAGUCCUU
chr5B:591186431-591186904(+)	364-385	4	osa-miR2118h/osa-miR2118k/zma-miR2118a/	22	UAGGAAUGACAGGCAACAGGAA	::::::::: ::::: ::::::	AUCCUUACUCUCCGUAGUCCUU
chr5B:591199063-591199830(+)	677-698	4	osa-miR2118h/osa-miR2118k/zma-miR2118a/	22	UUGGAAUGAGCGGCGUCAGGAA	: :::::::: :::.:::::::	AUCCUUACUCUCCGUAGUCCUU
chr5B:591476110-591476634(+)	476-497	4	osa-miR2118h/osa-miR2118k/zma-miR2118a/	22	UUGGAAUAAGCGGCAUCAGGAA	: ::::: :: :::::::::::	AUCCUUACUCUCCGUAGUCCUU
chr5B:591512528-591513146(+)	530-551	3.5	osa-miR2118h/osa-miR2118k/zma-miR2118a/	22	UGGGAACGAGUGGCAUCAGGAA	:.:::: ::: :::::::::::	AUCCUUACUCUCCGUAGUCCUU
chr5B:591586121-591586710(+)	562-583	4	osa-miR2118h/osa-miR2118k/zma-miR2118a/	22	UUGAAAUGAGUGGCAUCAGGAA	: : :::::: :::::::::::	AUCCUUACUCUCCGUAGUCCUU
chr5B:592203543-592204228(+)	593-614	4	osa-miR2118h/osa-miR2118k/zma-miR2118a/	22	UUGGCAUGAGCGGCAUCAGGAA	: :: ::::: :::::::::::	AUCCUUACUCUCCGUAGUCCUU
chr5B:596502052-596502987(+)	826-847	3.5	osa-miR2118h/osa-miR2118k/zma-miR2118a/	22	UGGGAAUAAGAGACAUCAGGAA	:.::::: :::: :::::::::	AUCCUUACUCUCCGUAGUCCUU
chr5B:598644785-598645449(+)	574-595	3.5	osa-miR2118h/osa-miR2118k/zma-miR2118a/	22	UAGGAAUGAAAGGUAUCAGGAG	::::::::: :::.:::::::.	AUCCUUACUCUCCGUAGUCCUU
chr5B:672165192-672165792(-)	510-531	2.5	osa-miR2118h/osa-miR2118k/zma-miR2118a/	22	UAGGUGUGCGAGGCAUCAGGAA	:::: .:: :::::::::::::	AUCCUUACUCUCCGUAGUCCUU
chr5B:674495940-674496447(+)	417-438	3.5	osa-miR2118h/osa-miR2118k/zma-miR2118a/	22	UAGGCGUGUGAGGCAUCAGGAU	:::: .:: ::::::::::::	AUCCUUACUCUCCGUAGUCCUU
chr5D:268534055-268534658(+)	513-534	4	osa-miR2118h/osa-miR2118k/zma-miR2118a/	22	UGGGAAUAGGAGGCAUUGGGAA	:.::::: .:::::::..::::	AUCCUUACUCUCCGUAGUCCUU
chr5D:434563979-434564705(+)	657-678	3.5	osa-miR2118h/osa-miR2118k/zma-miR2118a/	22	UGGGAAUGUGAGGCAACAGGAA	:.:::::: :::::: ::::::	AUCCUUACUCUCCGUAGUCCUU
chr5D:439490432-439491098(+)	599-620	4	osa-miR2118h/osa-miR2118k/zma-miR2118a/	22	AAGGAGUUGGAGGCAUCAGGAC	::::.: .::::::::::::	AUCCUUACUCUCCGUAGUCCUU
chr5D:439554726-439555591(+)	775-796	3	osa-miR2118h/osa-miR2118k/zma-miR2118a/	22	UAUGAAUGAGAGGCAUCAGAAA	:: :::::::::::::::: ::	AUCCUUACUCUCCGUAGUCCUU
chr5D:443016485-443017017(-)	444-465	2	osa-miR2118h/osa-miR2118k/zma-miR2118a/	22	UAGGGCUGGGAGGCAUCAGGAA	::::. ::.:::::::::::::	AUCCUUACUCUCCGUAGUCCUU
chr5D:446768733-446769456(-)	614-635	3	osa-miR2118h/osa-miR2118k/zma-miR2118a/	22	UAGGCCUGAGAGGCAUCGGGAA	:::: :::::::::::.::::	AUCCUUACUCUCCGUAGUCCUU
chr5D:447897814-447898539(+)	635-655	4	osa-miR2118h/osa-miR2118k/zma-miR2118a/	22	UAG-AUUGAGAGGCAUCGGGGA	::: : :::::::::::.::.:	AUCCUUACUCUCCGUAGUCCUU
chr5D:447985731-447986561(+)	742-763	3.5	osa-miR2118h/osa-miR2118k/zma-miR2118a/	22	UCGGAAUAGGAGGCAUUAGGAA	: ::::: .:::::::.:::::	AUCCUUACUCUCCGUAGUCCUU
chr5D:448721579-448722514(+)	845-866	4	osa-miR2118h/osa-miR2118k/zma-miR2118a/	22	UAGGUUUGAGAGGCAACAGGAA	:::: ::::::::: ::::::	AUCCUUACUCUCCGUAGUCCUU
chr5D:451688049-451688816(-)	677-698	1	osa-miR2118h/osa-miR2118k/zma-miR2118a/	22	UAGGAAGGAGAGGCAUCAGGAA	:::::: :::::::::::::::	AUCCUUACUCUCCGUAGUCCUU
chr5D:481762804-481763410(+)	447-467	4	osa-miR2118h/osa-miR2118k/zma-miR2118a/	22	UAGAAUUGAGAGGCAUC-GGAA	::: : ::::::::::: ::::	AUCCUUACUCUCCGUAGUCCUU
chr5D:482012874-482013578(+)	595-616	4	osa-miR2118h/osa-miR2118k/zma-miR2118a/	22	UUGGAAUAAGCGGCAUCAGGAA	: ::::: :: :::::::::::	AUCCUUACUCUCCGUAGUCCUU
chr5D:482416909-482417448(+)	449-470	2.5	osa-miR2118h/osa-miR2118k/zma-miR2118a/	22	UGGGAAUGAGUGGCAUCAGGAA	:.:::::::: :::::::::::	AUCCUUACUCUCCGUAGUCCUU
chr5D:482603180-482603905(+)	637-658	4	osa-miR2118h/osa-miR2118k/zma-miR2118a/	22	UUGGCAUGAGCGGCAUCAGGAA	: :: ::::: :::::::::::	AUCCUUACUCUCCGUAGUCCUU
chr5D:482762019-482762786(-)	677-698	4	osa-miR2118h/osa-miR2118k/zma-miR2118a/	22	UGGCAAUGGGAGGUGUCAGGAA	:.: ::::.::::..:::::::	AUCCUUACUCUCCGUAGUCCUU
chr5D:484704329-484705157(-)	719-740	3.5	osa-miR2118h/osa-miR2118k/zma-miR2118a/	22	CGGGAAUGAGAGACAUCAGGAA	.:::::::::: :::::::::	AUCCUUACUCUCCGUAGUCCUU
chr5D:486893476-486894343(+)	777-798	3.5	osa-miR2118h/osa-miR2118k/zma-miR2118a/	22	UAGGAAUGAAAGGCAUCGGGAG	::::::::: :::::::.:::.	AUCCUUACUCUCCGUAGUCCUU
chr5D:495789266-495789825(+)	469-490	2.5	osa-miR2118h/osa-miR2118k/zma-miR2118a/	22	UAGGAGUGAGAUGCAUCAGGAA	:::::.::::: ::::::::::	AUCCUUACUCUCCGUAGUCCUU
chr6A:24240317-24240857(+)	470-491	3.5	osa-miR2118h/osa-miR2118k/zma-miR2118a/	22	UGGGAGUAGGAGGCGUCAGGAA	:.:::.: .:::::.:::::::	AUCCUUACUCUCCGUAGUCCUU
chr6A:52468851-52469303(+)	362-383	4	osa-miR2118h/osa-miR2118k/zma-miR2118a/	22	GAGGACUGAGAGGCAGCAGGAA	:::: ::::::::: ::::::	AUCCUUACUCUCCGUAGUCCUU
chr6A:54182004-54182750(+)	656-677	4	osa-miR2118h/osa-miR2118k/zma-miR2118a/	22	UAGGCUUGAGAGCCAUCAGGAA	:::: :::::: :::::::::	AUCCUUACUCUCCGUAGUCCUU
chr6A:558900032-558900612(-)	490-511	3.5	osa-miR2118h/osa-miR2118k/zma-miR2118a/	22	UAGGGAUGAGAGGUAUGAGGAA	::::.::::::::.:: :::::	AUCCUUACUCUCCGUAGUCCUU
chr6A:558959710-558960376(-)	557-578	4	osa-miR2118h/osa-miR2118k/zma-miR2118a/	22	UAGGCAUGAGAGGCAUGGGGAA	:::: ::::::::::: .::::	AUCCUUACUCUCCGUAGUCCUU
chr6A:560635448-560636066(+)	530-551	3.5	osa-miR2118h/osa-miR2118k/zma-miR2118a/	22	UGGGAAUGAGCGGCAUUAGGAA	:.:::::::: :::::.:::::	AUCCUUACUCUCCGUAGUCCUU
chr6A:6906559-6907219(-)	550-572	4	osa-miR2118h/osa-miR2118k/zma-miR2118a/	22	UAGGUUUGAGAGGCAGUCAGGAA	:::: ::::::::: :::::::	AUCCUUACUCUCCGU-AGUCCUU
chr6A:7060205-7060743(+)	447-469	4	osa-miR2118h/osa-miR2118k/zma-miR2118a/	22	UAGGCUUGAGAGGCAAUCAGGAA	:::: ::::::::: :::::::	AUCCUUACUCUCCGU-AGUCCUU
[truncated: 469 more rows]

## Sheet: ST4
Supplementary Table 4. The predicted target in TS with a score less than four, as determined by the Targetfinder program.
PHAS Loci (+/- strand)	Targetsite Regions	Target Score	miRNA name in miRbase	miRNA length	Target sequences	Base pairs	miRNA sequences
chr2D:351389781-351390401(-)	530-551	3	aof-miR2118a/	22	UAGGAAUAGGUGGCAUCGGGAA	:::: :::::::::::::::	UUCCUAAUCCACCGUAGCCCUC
chr3B:759180132-759180710(-)	488-509	4	aof-miR2118a/	22	CUGGAAUAGGUGGCAUCGGGAA	::: :::::::::::::::	UUCCUAAUCCACCGUAGCCCUC
chr3B:775709168-775709896(-)	638-659	3.5	aof-miR2118a/	22	UAGGAUUGGGUGGCAUUGGGAA	::::::.::::::::.::::	UUCCUAAUCCACCGUAGCCCUC
chrUn:82082098-82082699(+)	511-532	4	aof-miR2118a/	22	UAGGAUUAGGAGGCAUCGGGAA	::::::::: ::::::::::	UUCCUAAUCCACCGUAGCCCUC
chr1A:494169761-494170339(-)	488-509	3	aof-miR2118c/	22	UUGGAAUGGGUGGCAUCGGAAA	::: ::::::::::::::::	UUCCUAACCCACCGUAGCCUUU
chr1B:592137704-592138470(-)	697-718	4	aof-miR2118c/	22	UAGGAAUGAGUGGCAUUGGAAA	:::: :: :::::::.:::::	UUCCUAACCCACCGUAGCCUUU
chr1D:274480580-274481327(-)	502-523	4	aof-miR2118c/	22	GGGUAGUGUGUGGCAUCGGAAA	..: : :: :::::::::::::	UUCCUAACCCACCGUAGCCUUU
chr2D:351389781-351390401(-)	530-551	4	aof-miR2118c/	22	UAGGAAUAGGUGGCAUCGGGAA	:::: : :::::::::::.::	UUCCUAACCCACCGUAGCCUUU
chr3B:60863209-60863962(-)	663-684	3.5	aof-miR2118c/	22	UGGGAAUGAGUGGCAUCGGAAA	.::: :: :::::::::::::	UUCCUAACCCACCGUAGCCUUU
chr3B:775709168-775709896(-)	638-659	3	aof-miR2118c/	22	UAGGAUUGGGUGGCAUUGGGAA	:::::::::::::::.::.::	UUCCUAACCCACCGUAGCCUUU
chr3D:38193178-38193926(-)	658-679	3.5	aof-miR2118c/	22	UGGGAAUGAGUGGCAUCGGAAA	.::: :: :::::::::::::	UUCCUAACCCACCGUAGCCUUU
chr5B:594731721-594732425(+)	616-637	4	aof-miR2118c/	22	UCGGAAUGAGUGGCAUCGGAAA	::: :: :::::::::::::	UUCCUAACCCACCGUAGCCUUU
chr5D:439378541-439379100(+)	469-490	4	aof-miR2118c/	22	UAUGAAUGUGUGGCAUCGGAAA	: :: :: :::::::::::::	UUCCUAACCCACCGUAGCCUUU
chrUn:21629802-21630340(-)	448-469	4	aof-miR2118c/	22	CAGGCUUGGGUGGCAUUGGGAA	::: :::::::::::.::.::	UUCCUAACCCACCGUAGCCUUU
chrUn:465893061-465893471(+)	341-362	4	aof-miR2118c/	22	UUGGAAUGAGUGGCAUCGGAAA	::: :: :::::::::::::	UUCCUAACCCACCGUAGCCUUU
chrUn:67103150-67103877(+)	560-581	4	aof-miR2118c/	22	UUGGAAUGAGUGGCAUCGGAAA	::: :: :::::::::::::	UUCCUAACCCACCGUAGCCUUU
chr2D:450395394-450395992(-)	222-243	4	gma-miR2118a-5p/gma-miR2118b-5p/	22	CCAUACCAACCCUCUCAUCUCC	: :::: ::::::.:::::::	GAAAUGGCUGGGAGGGUAGAGG
chr5B:595229975-595230536(+)	464-485	3.5	gma-miR2118a-5p/gma-miR2118b-5p/	22	CCUUGCCUCCCCUCCCAUCUCC	: ::.:: :::::::::::::	GAAAUGGCUGGGAGGGUAGAGG
chr7D:106625889-106626641(-)	612-634	4	aof-miR2118b/	22	UAGAAAUGGGAGGCAUCGGAGAA	:::::::::::::: :::: :::	AUCUUUACCCUCCGAAGCC-CUU
chr3A:14052320-14053524(-)	1095-1116	4	aof-miR2118b/	22	UGGGAAUAGGAGGCUUCAGGAA	:.:.::: ::::::::: ::::	AUCUUUACCCUCCGAAGCCCUU
chr3A:14080005-14080477(-)	363-384	4	aof-miR2118b/	22	UGGGAAUAGGAGGCUUCAGGAA	:.:.::: ::::::::: ::::	AUCUUUACCCUCCGAAGCCCUU
chr3A:28456004-28456788(+)	675-696	4	aof-miR2118b/	22	UAGGAGUGAGAGGCAUCGGGAA	:::.:.:: ::::: :::::::	AUCUUUACCCUCCGAAGCCCUU
chr3A:30144397-30145141(+)	635-656	3.5	aof-miR2118b/	22	UGGGGAUGGGAGGCUUCAGGAA	:.:..:::::::::::: ::::	AUCUUUACCCUCCGAAGCCCUU
chr3A:708303707-708304390(+)	593-614	2.5	aof-miR2118b/	22	UGGAAAUGGGAGGCUCCGGGAA	:.::::::::::::: ::::::	AUCUUUACCCUCCGAAGCCCUU
chr3B:33969598-33970281(-)	574-595	4	aof-miR2118b/	22	UAGGAGUAGGAGGCAUCGGGAA	:::.:.: :::::: :::::::	AUCUUUACCCUCCGAAGCCCUU
chr3B:683762237-683763140(-)	813-834	4	aof-miR2118b/	22	UAGAACUGCGAGGCGUCGGGAA	::::: :: ::::: :::::::	AUCUUUACCCUCCGAAGCCCUU
chr3B:684051112-684052005(-)	803-824	4	aof-miR2118b/	22	UAGAAUUAGGAGGCAUCGGGAA	::::: : :::::: :::::::	AUCUUUACCCUCCGAAGCCCUU
chr3B:859612-860211(-)	490-511	3	aof-miR2118b/	22	UGGGAAGCGGAGGCUUCGGGAA	:.:.:: ::::::::::::::	AUCUUUACCCUCCGAAGCCCUU
chr3D:21588956-21589637(+)	572-593	3.5	aof-miR2118b/	22	UGGGGAUGGGAGGCUUCAGGAA	:.:..:::::::::::: ::::	AUCUUUACCCUCCGAAGCCCUU
chr4A:632785383-632786192(+)	740-761	3	aof-miR2118b/	22	UAGCAAUGGGAGGCAUCGGGAA	::: :::::::::: :::::::	AUCUUUACCCUCCGAAGCCCUU
chr4A:672164368-672164990(-)	533-554	4	aof-miR2118b/	22	UGGGAAUAGGAGGCGUCGGGAA	:.:.::: :::::: :::::::	AUCUUUACCCUCCGAAGCCCUU
chr4A:713288059-713288986(-)	818-839	4	aof-miR2118b/	22	CGGGAAUGGGAGACUUCGGGAA	.:.:::::::: :::::::::	AUCUUUACCCUCCGAAGCCCUU
chr4A:713943444-713944340(+)	787-808	3.5	aof-miR2118b/	22	CAGGAAUGGGAGACUUCGGGAA	::.:::::::: :::::::::	AUCUUUACCCUCCGAAGCCCUU
chr4B:10400938-10401600(+)	553-574	4	aof-miR2118b/	22	UUGAAAUGAGAGGCCUCGGGAA	: :::::: ::::: :::::::	AUCUUUACCCUCCGAAGCCCUU
chr4B:10452477-10453140(+)	572-593	3	aof-miR2118b/	22	UAGAAAUGCGAGGCUUCAGGAA	:::::::: :::::::: ::::	AUCUUUACCCUCCGAAGCCCUU
chr4B:10479947-10480703(+)	647-668	3	aof-miR2118b/	22	UAGAAAUGGGAGGCCUUGGGAA	:::::::::::::: :.:::::	AUCUUUACCCUCCGAAGCCCUU
chr4B:11709417-11710060(+)	574-595	3.5	aof-miR2118b/	22	UGGAAAUGAGAGGCCUCGGGAA	:.:::::: ::::: :::::::	AUCUUUACCCUCCGAAGCCCUU
chr4D:5715793-5716521(+)	638-659	3	aof-miR2118b/	22	UUGAAAUGGGAGGCCUCGGGAA	: :::::::::::: :::::::	AUCUUUACCCUCCGAAGCCCUU
chr4D:5722064-5722623(+)	490-511	4	aof-miR2118b/	22	UUGAAAUGAGAGGCCUCGGGAA	: :::::: ::::: :::::::	AUCUUUACCCUCCGAAGCCCUU
chr4D:5785550-5786046(+)	406-427	4	aof-miR2118b/	22	UAGAAUUGAGAGGCCUCGGGAA	::::: :: ::::: :::::::	AUCUUUACCCUCCGAAGCCCUU
chr4D:5799393-5799992(+)	530-551	3	aof-miR2118b/	22	UAGAAAUGAGAGGCCUCGGGAA	:::::::: ::::: :::::::	AUCUUUACCCUCCGAAGCCCUU
chr5A:566646384-566646981(+)	530-551	3.5	aof-miR2118b/	22	UAGGACUGUGAGGUUUCGGGAA	:::.: :: ::::.::::::::	AUCUUUACCCUCCGAAGCCCUU
chr5B:677924837-677925653(-)	656-677	3	aof-miR2118b/	22	UAGCAAUGGGAGGCAUCGGGAA	::: :::::::::: :::::::	AUCUUUACCCUCCGAAGCCCUU
chr7A:19261357-19262352(-)	907-928	4	aof-miR2118b/	22	CGGGAAUGGGAGACUUCGGGAA	.:.:::::::: :::::::::	AUCUUUACCCUCCGAAGCCCUU
chr7A:617114157-617114924(+)	679-700	4	aof-miR2118b/	22	UGGGAACGGGAGGCUUCAGGAA	:.:.:: :::::::::: ::::	AUCUUUACCCUCCGAAGCCCUU
chr7B:637336386-637337134(-)	679-700	3.5	aof-miR2118b/	22	UAGGAAUGAGAGGCCUCGGGAA	:::.:::: ::::: :::::::	AUCUUUACCCUCCGAAGCCCUU
chr7D:18805798-18806712(-)	805-826	4	aof-miR2118b/	22	CGGGAAUGGGAGACUUCGGGAA	.:.:::::::: :::::::::	AUCUUUACCCUCCGAAGCCCUU
chr7D:536307248-536308130(-)	722-743	4	aof-miR2118b/	22	UGGGAACGGGAGGCUUCAGGAA	:.:.:: :::::::::: ::::	AUCUUUACCCUCCGAAGCCCUU
chrUn:31921860-31922315(+)	364-385	4	aof-miR2118b/	22	UAGGAGUUGGAGGCUUCAGGAA	:::.:.: ::::::::: ::::	AUCUUUACCCUCCGAAGCCCUU
chr1D:415620955-415621449(+)	384-406	4	mes-miR2118/	22	UCGAAAUAGGUGGCAUCGGGAAC	: ::::: :::::::: ::::::	AUCUUUACCCACCGUA-CCCUUG
chr2D:351389781-351390401(-)	529-551	3.5	mes-miR2118/	22	UAGGAAUAGGUGGCAUCGGGAAC	:::.::: :::::::: ::::::	AUCUUUACCCACCGUA-CCCUUG
chr3B:775709168-775709896(-)	637-659	3.5	mes-miR2118/	22	UAGGAUUGGGUGGCAUUGGGAAC	:::.: :::::::::: ::::::	AUCUUUACCCACCGUA-CCCUUG
chr4A:650582079-650582594(+)	427-449	3	zma-miR2118g/	22	UACGGAAUAAGAGGCGUCAGGAA	:: :::::: :::::.:::::::	AU-CCUUAUCCUCCGUAGUCCUU
chr4A:651107989-651108672(-)	595-617	4	zma-miR2118g/	22	UAUGGAACAAGAGGCAUUAGGAA	:: :::: : :::::::.:::::	AU-CCUUAUCCUCCGUAGUCCUU
chr4A:651124519-651124950(-)	343-365	4	zma-miR2118g/	22	UAUGGAAUAAGAGGCAUUGGGAA	:: :::::: :::::::..::::	AU-CCUUAUCCUCCGUAGUCCUU
chr4A:651129508-651130172(-)	574-596	4	zma-miR2118g/	22	UAUGGAAUAGGAGGCAUAGGGAA	:: :::::::::::::: .::::	AU-CCUUAUCCUCCGUAGUCCUU
chr5B:13465051-13465650(-)	490-512	4	zma-miR2118g/	22	UAUGGAAUAGGAGGCACCGGGAA	:: ::::::::::::: :.::::	AU-CCUUAUCCUCCGUAGUCCUU
chr7A:42812698-42813400(+)	635-657	3	zma-miR2118g/	22	UAUGGAAUAAGAGGCAUCGGGAA	:: :::::: ::::::::.::::	AU-CCUUAUCCUCCGUAGUCCUU
chr7A:42844601-42845454(+)	763-785	3	zma-miR2118g/	22	UAUGGAAUAAGAGGCAUUAGGAA	:: :::::: :::::::.:::::	AU-CCUUAUCCUCCGUAGUCCUU
chr7A:79591123-79591573(+)	362-384	4	zma-miR2118g/	22	UACGGAACAAGAGGCAUCGGGAA	:: :::: : ::::::::.::::	AU-CCUUAUCCUCCGUAGUCCUU
chr4A:720073006-720073710(+)	614-636	4	zma-miR2118g/	22	UGGGGAUUAGGAGGCAUCAAGAA	:.::.:: ::::::::::: :::	AUCCUUA-UCCUCCGUAGUCCUU
chr7A:14671162-14671905(-)	653-675	4	zma-miR2118g/	22	UGGGGAUUAGGAGGCAUCAAGAA	:.::.:: ::::::::::: :::	AUCCUUA-UCCUCCGUAGUCCUU
chr2B:647738629-647739230(-)	511-533	4	zma-miR2118g/	22	UUCGAAUUUGGAGGCAUCAGGAA	: :::: ::::::::::::::	AUCCUUAU-CCUCCGUAGUCCUU
chr3A:691250006-691250714(-)	619-641	4	zma-miR2118g/	22	UUGGAAUAGUAGGCAUACAGGAA	: ::::::: :::::: ::::::	AUCCUUAUCCUCCGUA-GUCCUU
chr3B:736935989-736936851(-)	773-795	4	zma-miR2118g/	22	UUGGAAUAGUAGGCAUACAGGAA	: ::::::: :::::: ::::::	AUCCUUAUCCUCCGUA-GUCCUU
chr3B:758231247-758231888(-)	550-572	4	zma-miR2118g/	22	UUGGACUAGGAGGCAUUCAGGAA	: ::: :::::::::: ::::::	AUCCUUAUCCUCCGUA-GUCCUU
chr5A:554852525-554853154(+)	519-541	4	zma-miR2118g/	22	UAGGCAUUGGAGGCAUACAGGAA	:::: :: :::::::: ::::::	AUCCUUAUCCUCCGUA-GUCCUU
chr5A:620746837-620747397(-)	471-493	4	zma-miR2118g/	22	UCGGAAUAGUAGGCAUACAGGAA	: ::::::: :::::: ::::::	AUCCUUAUCCUCCGUA-GUCCUU
chr5B:533990853-533991879(+)	916-938	4	zma-miR2118g/	22	UAGGCAUUGGAGGCAUACAGGAA	:::: :: :::::::: ::::::	AUCCUUAUCCUCCGUA-GUCCUU
chr5B:534014837-534015517(+)	529-551	4	zma-miR2118g/	22	UAGGCAUUGGAGGCAUACAGGAA	:::: :: :::::::: ::::::	AUCCUUAUCCUCCGUA-GUCCUU
chr5B:615387149-615387790(-)	552-574	4	zma-miR2118g/	22	UUGGAAUAGUAGGCAUACAGGAA	: ::::::: :::::: ::::::	AUCCUUAUCCUCCGUA-GUCCUU
chr5D:438826796-438827479(+)	573-595	4	zma-miR2118g/	22	UAGGCAUUGGAGGCAUACAGGAA	:::: :: :::::::: ::::::	AUCCUUAUCCUCCGUA-GUCCUU
chr5D:438834302-438835134(+)	741-763	4	zma-miR2118g/	22	UAGGCAUUGGAGGCAUACAGGAA	:::: :: :::::::: ::::::	AUCCUUAUCCUCCGUA-GUCCUU
chr5D:438843488-438843938(+)	382-404	4	zma-miR2118g/	22	UAGGCAUUGGAGGCAUACAGGAA	:::: :: :::::::: ::::::	AUCCUUAUCCUCCGUA-GUCCUU
chr5D:438981200-438981829(+)	523-545	4	zma-miR2118g/	22	UAGGUAUUGGAGGCAUACAGGAA	:::: :: :::::::: ::::::	AUCCUUAUCCUCCGUA-GUCCUU
chr3A:691330474-691331220(-)	655-677	3.5	zma-miR2118g/	22	UGGGAAUAGUAGGCAUCCAGGAA	:.::::::: ::::::: :::::	AUCCUUAUCCUCCGUAG-UCCUU
chr3A:691457416-691458314(-)	788-810	4	zma-miR2118g/	22	UUGGAAUAGUAGGCAUCCAGGAA	: ::::::: ::::::: :::::	AUCCUUAUCCUCCGUAG-UCCUU
chr3A:691475573-691476205(-)	478-500	4	zma-miR2118g/	22	UUGGAAUAGUAGGCAUCCAGGAA	: ::::::: ::::::: :::::	AUCCUUAUCCUCCGUAG-UCCUU
chr3A:691631284-691631946(-)	594-616	3.5	zma-miR2118g/	22	UGGGAAUAGUAGGCAUCCAGGAA	:.::::::: ::::::: :::::	AUCCUUAUCCUCCGUAG-UCCUU
chr3A:691652821-691653446(-)	536-558	4	zma-miR2118g/	22	UUGGAAUAGUAGGCAUCCAGGAA	: ::::::: ::::::: :::::	AUCCUUAUCCUCCGUAG-UCCUU
chr3B:737324716-737325540(-)	735-757	4	zma-miR2118g/	22	UCGGAAUAGUAGGCAUCUAGGAA	: ::::::: ::::::: :::::	AUCCUUAUCCUCCGUAG-UCCUU
chr3B:737435612-737436043(-)	340-362	3.5	zma-miR2118g/	22	UGGGAAUAGAAGGCAUCCAGGAA	:.::::::: ::::::: :::::	AUCCUUAUCCUCCGUAG-UCCUU
chr3B:737559767-737560637(-)	760-782	4	zma-miR2118g/	22	UUGGAAUAGUAGGCAUCCAGGAA	: ::::::: ::::::: :::::	AUCCUUAUCCUCCGUAG-UCCUU
chr3D:573543745-573544628(+)	784-806	4	zma-miR2118g/	22	UGGGAAUGGGAGGUAUCUAGGAA	:.:::::.:::::.::: :::::	AUCCUUAUCCUCCGUAG-UCCUU
chr4A:666123797-666124557(+)	671-693	4	zma-miR2118g/	22	UAGGGAUGAGAGGCAUCGAGGAA	::::.::. :::::::: :::::	AUCCUUAUCCUCCGUAG-UCCUU
chr4B:22904939-22905875(-)	845-867	4	zma-miR2118g/	22	UGGGCAUGGGAGGCAUCCAGGAA	:.:: ::.::::::::: :::::	AUCCUUAUCCUCCGUAG-UCCUU
chr3B:762831643-762832240(+)	508-530	4	zma-miR2118g/	22	UGGGAAUGGGAGGCAUUAAGGAA	:.:::::.::::::::.: ::::	AUCCUUAUCCUCCGUAGU-CCUU
chr5D:500972830-500973662(-)	741-763	3	zma-miR2118g/	22	UAAGAAUAGGAGGCAUCAUGGAA	:: ::::::::::::::: ::::	AUCCUUAUCCUCCGUAGU-CCUU
chr7A:112338168-112339027(+)	749-771	3.5	zma-miR2118g/	22	UAGGCAUGGGAGGCAUCAGAGAA	:::: ::.::::::::::: :::	AUCCUUAUCCUCCGUAGUC-CUU
chr7A:112355642-112356302(+)	571-593	3.5	zma-miR2118g/	22	UAGGAAUGGGAGGCAUCGGAGAA	:::::::.:::::::::.: :::	AUCCUUAUCCUCCGUAGUC-CUU
chr7D:106918282-106918942(+)	571-593	3.5	zma-miR2118g/	22	UAGGCAUGGGAGGCAUCAGAGAA	:::: ::.::::::::::: :::	AUCCUUAUCCUCCGUAGUC-CUU
chr1A:380495433-380495885(-)	364-385	4	zma-miR2118g/	22	UAGGAUUAGGAUGCGUCAGGAA	::::: ::::: ::.:::::::	AUCCUUAUCCUCCGUAGUCCUU
chr1A:437727136-437727945(-)	721-742	4	zma-miR2118g/	22	UAGGAUUAGAAGGCGUCAGGAA	::::: ::: ::::.:::::::	AUCCUUAUCCUCCGUAGUCCUU
chr1A:494189371-494189957(-)	468-489	3.5	zma-miR2118g/	22	UUGGAAUGGGAGGCAUCAGAAA	: :::::.::::::::::: ::	AUCCUUAUCCUCCGUAGUCCUU
chr1A:520433240-520433763(-)	433-454	2	zma-miR2118g/	22	UAGGCAUAUGAGGCAUCAGGAA	:::: ::: :::::::::::::	AUCCUUAUCCUCCGUAGUCCUU
chr1A:520553115-520553842(-)	637-658	2.5	zma-miR2118g/	22	UGGGCAUAUGAGGCAUCAGGAA	:.:: ::: :::::::::::::	AUCCUUAUCCUCCGUAGUCCUU
chr1A:543386158-543386796(-)	569-590	3.5	zma-miR2118g/	22	UAGGGAUUGGAAGCAUCAGGAA	::::.:: ::: ::::::::::	AUCCUUAUCCUCCGUAGUCCUU
chr1A:556724508-556725025(-)	427-448	4	zma-miR2118g/	22	UAGGCAUAGGAGGCACUAGGAA	:::: :::::::::: .:::::	AUCCUUAUCCUCCGUAGUCCUU
chr1A:556785507-556786133(-)	511-532	4	zma-miR2118g/	22	GAGGCAUAGGAGGCACCAGGAA	::: :::::::::: ::::::	AUCCUUAUCCUCCGUAGUCCUU
chr1A:556803916-556804513(+)	488-509	3	zma-miR2118g/	22	UAGGCAUAGGAGGCACCAGGAA	:::: :::::::::: ::::::	AUCCUUAUCCUCCGUAGUCCUU
chr1A:556813784-556814583(+)	709-730	3	zma-miR2118g/	22	UAGGCAUAGGAGGCACCAGGAA	:::: :::::::::: ::::::	AUCCUUAUCCUCCGUAGUCCUU
chr1A:556815883-556816776(+)	803-824	3	zma-miR2118g/	22	UAGGCAUAGGAGGCACCAGGAA	:::: :::::::::: ::::::	AUCCUUAUCCUCCGUAGUCCUU
chr1B:22903824-22904278(-)	364-385	4	zma-miR2118g/	22	UAGGAAUUGGAAGCAUCAGGAU	::::::: ::: :::::::::	AUCCUUAUCCUCCGUAGUCCUU
chr1B:410308052-410308708(-)	568-589	4	zma-miR2118g/	22	UAGGAUUAGGAUGCGUCAGGAA	::::: ::::: ::.:::::::	AUCCUUAUCCUCCGUAGUCCUU
chr1B:453318529-453319273(-)	656-677	4	zma-miR2118g/	22	UAGGAUUAGAAGGCGUCAGGAA	::::: ::: ::::.:::::::	AUCCUUAUCCUCCGUAGUCCUU
chr1B:529437692-529438209(-)	448-469	4	zma-miR2118g/	22	UAGGCAUAAGAGGCACCAGGAA	:::: ::: :::::: ::::::	AUCCUUAUCCUCCGUAGUCCUU
chr1B:566022199-566022863(+)	574-595	4	zma-miR2118g/	22	GGGGAAUGGGAGGCAUCAAGAA	.:::::.:::::::::: :::	AUCCUUAUCCUCCGUAGUCCUU
chr1B:573753724-573754388(-)	574-595	2.5	zma-miR2118g/	22	UGGGCAUAUGAGGCAUCAGGAA	:.:: ::: :::::::::::::	AUCCUUAUCCUCCGUAGUCCUU
chr1B:573760627-573761226(-)	509-530	4	zma-miR2118g/	22	UAGGCAUAUGAGGCAUCAGUAA	:::: ::: :::::::::: ::	AUCCUUAUCCUCCGUAGUCCUU
chr1B:595352719-595353341(-)	532-553	4	zma-miR2118g/	22	UAGGCAUAUGAGGCAGCAGGAA	:::: ::: :::::: ::::::	AUCCUUAUCCUCCGUAGUCCUU
chr1B:595407975-595408765(-)	700-721	4	zma-miR2118g/	22	UAGGCAUAUGAGGCAGCAGGAA	:::: ::: :::::: ::::::	AUCCUUAUCCUCCGUAGUCCUU
chr1B:595442836-595443584(-)	658-679	4	zma-miR2118g/	22	UAGGAAUAUGAGGUACCAGGAA	:::::::: ::::.: ::::::	AUCCUUAUCCUCCGUAGUCCUU
chr1B:595474849-595475506(-)	634-655	3.5	zma-miR2118g/	22	UGGGCAUAAGAGGCAUUAGGAA	:.:: ::: :::::::.:::::	AUCCUUAUCCUCCGUAGUCCUU
chr1B:612988573-612989088(-)	427-448	3	zma-miR2118g/	22	UAGGAUUUAGAGGCAUCAGGAA	::::: : :::::::::::::	AUCCUUAUCCUCCGUAGUCCUU
chr1B:640470917-640471794(-)	761-782	4	zma-miR2118g/	22	UAGGCAUAUGAGGCAACAGGAA	:::: ::: :::::: ::::::	AUCCUUAUCCUCCGUAGUCCUU
chr1B:640481384-640481899(-)	425-446	2	zma-miR2118g/	22	UAGGCAUAGGGGGCAUCAGGAA	:::: :::::.:::::::::::	AUCCUUAUCCUCCGUAGUCCUU
chr1B:640484225-640484824(-)	490-511	4	zma-miR2118g/	22	UAGGCAUAGGGGGCCUCAGGAA	:::: :::::.::: :::::::	AUCCUUAUCCUCCGUAGUCCUU
chr1B:640596613-640597651(+)	929-950	3	zma-miR2118g/	22	UAGGCAUAGGAGGCACCAGGAA	:::: :::::::::: ::::::	AUCCUUAUCCUCCGUAGUCCUU
chr1D:338637326-338637925(-)	574-595	4	zma-miR2118g/	22	UAGGAUUAGAAGGCGUCAGGAA	::::: ::: ::::.:::::::	AUCCUUAUCCUCCGUAGUCCUU
chr1D:391240713-391241428(+)	550-571	3.5	zma-miR2118g/	22	UUGGAAUGGGCGGCAUCAGGAA	: :::::.:: :::::::::::	AUCCUUAUCCUCCGUAGUCCUU
chr1D:393482355-393482997(+)	554-575	4	zma-miR2118g/	22	UAGGCAUAAGAGGCACCAGGAA	:::: ::: :::::: ::::::	AUCCUUAUCCUCCGUAGUCCUU
chr1D:413351016-413351747(+)	622-643	4	zma-miR2118g/	22	UAGGCAUAGGAGGCACUAGGAA	:::: :::::::::: .:::::	AUCCUUAUCCUCCGUAGUCCUU
chr1D:413411019-413411704(-)	595-616	4	zma-miR2118g/	22	UUGGAAUAAGACGCAUCAGGAA	: :::::: :: ::::::::::	AUCCUUAUCCUCCGUAGUCCUU
chr1D:415460575-415461218(+)	553-574	2	zma-miR2118g/	22	UCGAAAUAGGAGGCAUCAGGAA	: : ::::::::::::::::::	AUCCUUAUCCUCCGUAGUCCUU
chr1D:415492216-415492775(+)	469-490	4	zma-miR2118g/	22	UCGAAAUAGGAGGCAUCAGUAA	: : ::::::::::::::: ::	AUCCUUAUCCUCCGUAGUCCUU
chr1D:416875376-416876042(-)	557-578	3.5	zma-miR2118g/	22	UAGGGAUAGGAUGCAUCGGGAA	::::.:::::: :::::.::::	AUCCUUAUCCUCCGUAGUCCUU
chr1D:424538038-424538622(-)	475-496	2.5	zma-miR2118g/	22	UGGGCAUAUGAGGCAUCAGGAA	:.:: ::: :::::::::::::	AUCCUUAUCCUCCGUAGUCCUU
chr1D:424596718-424597380(-)	572-593	2	zma-miR2118g/	22	UAGGCAUAUGAGGCAUCAGGAA	:::: ::: :::::::::::::	AUCCUUAUCCUCCGUAGUCCUU
chr1D:424629683-424630198(-)	425-446	2	zma-miR2118g/	22	UAGGCAUAUGAGGCAUCAGGAA	:::: ::: :::::::::::::	AUCCUUAUCCUCCGUAGUCCUU
chr1D:439086645-439087473(-)	719-740	4	zma-miR2118g/	22	UAGGCAUAUGAGGCAGCAGGAA	:::: ::: :::::: ::::::	AUCCUUAUCCUCCGUAGUCCUU
chr1D:439113111-439114195(-)	994-1015	4	zma-miR2118g/	22	UAGGCAUAUGAGGCAGCAGGAA	:::: ::: :::::: ::::::	AUCCUUAUCCUCCGUAGUCCUU
chr1D:439125884-439126549(-)	575-596	3	zma-miR2118g/	22	UAGGAAUAUGAGGCACCAGGAA	:::::::: :::::: ::::::	AUCCUUAUCCUCCGUAGUCCUU
chr1D:447460418-447461353(-)	845-866	3	zma-miR2118g/	22	UAGGAUUUAGAGGCAUCAGGAA	::::: : :::::::::::::	AUCCUUAUCCUCCGUAGUCCUU
chr1D:447465687-447466317(-)	542-563	3.5	zma-miR2118g/	22	UAGGGAUUGGAAGCAUCAGGAA	::::.:: ::: ::::::::::	AUCCUUAUCCUCCGUAGUCCUU
chr1D:447521172-447521792(-)	532-553	3	zma-miR2118g/	22	UAGGAUUUAGAGGCAUCAGGAA	::::: : :::::::::::::	AUCCUUAUCCUCCGUAGUCCUU
chr1D:447529265-447529929(-)	574-595	3	zma-miR2118g/	22	UAGGAUUUAGAGGCAUCAGGAA	::::: : :::::::::::::	AUCCUUAUCCUCCGUAGUCCUU
chr1D:464296813-464297452(-)	530-551	3	zma-miR2118g/	22	UAGGCAUAGGAGGCACCAGGAA	:::: :::::::::: ::::::	AUCCUUAUCCUCCGUAGUCCUU
chr1D:464316554-464317281(-)	616-637	4	zma-miR2118g/	22	GAGGCAUAGGAGGCACCAGGAA	::: :::::::::: ::::::	AUCCUUAUCCUCCGUAGUCCUU
chr1D:464346563-464347227(+)	574-595	3	zma-miR2118g/	22	UAGGCAUAGGAGGCACCAGGAA	:::: :::::::::: ::::::	AUCCUUAUCCUCCGUAGUCCUU
chr1D:464374153-464374949(+)	687-708	3	zma-miR2118g/	22	UAGGCAUAGGAGGCACCAGGAA	:::: :::::::::: ::::::	AUCCUUAUCCUCCGUAGUCCUU
chr1D:464389965-464390815(+)	760-781	4	zma-miR2118g/	22	UAGGCAUAUGAGGCACCAGGAA	:::: ::: :::::: ::::::	AUCCUUAUCCUCCGUAGUCCUU
chr1D:464392931-464393885(+)	845-866	3	zma-miR2118g/	22	UAGGCAUAGGAGGCACCAGGAA	:::: :::::::::: ::::::	AUCCUUAUCCUCCGUAGUCCUU
chr2B:2688568-2689125(+)	469-490	4	zma-miR2118g/	22	UAGGAAUAAGAGGUAUCGGGGA	:::::::: ::::.:::.::.:	AUCCUUAUCCUCCGUAGUCCUU
chr2B:647702861-647703493(-)	542-563	3	zma-miR2118g/	22	UUGGAUUUGGAGGCAUCAGGAA	: ::: : ::::::::::::::	AUCCUUAUCCUCCGUAGUCCUU
chr2B:647711579-647712199(-)	532-553	4	zma-miR2118g/	22	UUGGAUUUGGAGGCAUUAGGAA	: ::: : ::::::::.:::::	AUCCUUAUCCUCCGUAGUCCUU
chr2B:647717952-647718404(-)	362-383	4	zma-miR2118g/	22	UUGGAUUUGGAGGCAUUAGGAA	: ::: : ::::::::.:::::	AUCCUUAUCCUCCGUAGUCCUU
chr2B:690599585-690600186(+)	532-553	2.5	zma-miR2118g/	22	UAAGAGUAGGAGGCAUCGGGAA	:: ::.:::::::::::.::::	AUCCUUAUCCUCCGUAGUCCUU
chr2D:20665271-20665892(-)	533-554	4	zma-miR2118g/	22	UGGGGUUAGGAAGCAUCAGGAA	:.::. ::::: ::::::::::	AUCCUUAUCCUCCGUAGUCCUU
chr2D:20670146-20670808(-)	593-614	4	zma-miR2118g/	22	UGGGGUUAGGAAGCAUCAGGAA	:.::. ::::: ::::::::::	AUCCUUAUCCUCCGUAGUCCUU
chr2D:20673791-20674674(-)	795-816	3	zma-miR2118g/	22	UGGGGUUAGGAGGCAUCGGGAA	:.::. :::::::::::.::::	AUCCUUAUCCUCCGUAGUCCUU
chr2D:21414435-21415097(-)	574-595	3	zma-miR2118g/	22	UAGGACUAGGAGGCGUUAGGAA	::::: ::::::::.:.:::::	AUCCUUAUCCUCCGUAGUCCUU
chr2D:351389781-351390401(-)	530-551	3	zma-miR2118g/	22	UAGGAAUAGGUGGCAUCGGGAA	:::::::::: ::::::.::::	AUCCUUAUCCUCCGUAGUCCUU
chr2D:543045327-543045932(-)	515-536	3	zma-miR2118g/	22	UUGGAUUUGGAGGCAUCAGGAA	: ::: : ::::::::::::::	AUCCUUAUCCUCCGUAGUCCUU
chr2D:598886546-598886999(-)	363-384	2.5	zma-miR2118g/	22	UAGGAAUGGGAGGUGUCAGGAA	:::::::.:::::..:::::::	AUCCUUAUCCUCCGUAGUCCUU
chr2D:598890264-598891055(-)	701-722	3.5	zma-miR2118g/	22	UAGGAAUGGGAGGUGUCAGGAU	:::::::.:::::..::::::	AUCCUUAUCCUCCGUAGUCCUU
chr2D:598893208-598893786(-)	488-509	3.5	zma-miR2118g/	22	UAGGAAUGGGAGGUGUCAGGAU	:::::::.:::::..::::::	AUCCUUAUCCUCCGUAGUCCUU
chr3A:14052320-14053524(-)	1095-1116	2.5	zma-miR2118g/	22	UGGGAAUAGGAGGCUUCAGGAA	:.:::::::::::: :::::::	AUCCUUAUCCUCCGUAGUCCUU
chr3A:14080005-14080477(-)	363-384	2.5	zma-miR2118g/	22	UGGGAAUAGGAGGCUUCAGGAA	:.:::::::::::: :::::::	AUCCUUAUCCUCCGUAGUCCUU
chr3A:14160671-14161396(-)	616-637	3.5	zma-miR2118g/	22	UGGGAACAGGAGGCUUCAGGAA	:.:::: ::::::: :::::::	AUCCUUAUCCUCCGUAGUCCUU
chr3A:23194240-23195029(+)	677-698	3	zma-miR2118g/	22	GAGGAAUGAGAGGCAUCAGGAG	::::::. ::::::::::::.	AUCCUUAUCCUCCGUAGUCCUU
chr3A:27853901-27854673(-)	679-700	3.5	zma-miR2118g/	22	UAGGAGUUGGAGGCAUCAGAAA	:::::.: ::::::::::: ::	AUCCUUAUCCUCCGUAGUCCUU
chr3A:28441608-28442289(-)	593-614	3.5	zma-miR2118g/	22	UAGGAGUUGGAGUCAUCAGGAA	:::::.: :::: :::::::::	AUCCUUAUCCUCCGUAGUCCUU
chr3A:28448190-28448769(-)	489-510	3	zma-miR2118g/	22	UAUGAGUGGGAGGCGUCAGGAA	:: ::.:.::::::.:::::::	AUCCUUAUCCUCCGUAGUCCUU
chr3A:28456004-28456788(+)	675-696	3	zma-miR2118g/	22	UAGGAGUGAGAGGCAUCGGGAA	:::::.:. ::::::::.::::	AUCCUUAUCCUCCGUAGUCCUU
chr3A:28925786-28926163(-)	287-308	3	zma-miR2118g/	22	UAGGAGUAGGAGGCAUCAGUAG	:::::.::::::::::::: :.	AUCCUUAUCCUCCGUAGUCCUU
chr3A:29151511-29152152(+)	532-553	4	zma-miR2118g/	22	UAGGAGUAGGAGGCAUCGGUAG	:::::.:::::::::::.: :.	AUCCUUAUCCUCCGUAGUCCUU
chr3A:30144397-30145141(+)	635-656	3.5	zma-miR2118g/	22	UGGGGAUGGGAGGCUUCAGGAA	:.::.::.:::::: :::::::	AUCCUUAUCCUCCGUAGUCCUU
chr3A:32878140-32879012(+)	805-826	3	zma-miR2118g/	22	UAGGAAGAGGAGACAUCAGGAA	:::::: ::::: :::::::::	AUCCUUAUCCUCCGUAGUCCUU
chr3A:33989801-33990631(+)	740-761	4	zma-miR2118g/	22	UAGGAAAAGGAGGCACCGGGAA	:::::: :::::::: :.::::	AUCCUUAUCCUCCGUAGUCCUU
chr3A:34441066-34441833(+)	677-698	4	zma-miR2118g/	22	UAUGAAAAGGAGGCACCAGGAA	:: ::: :::::::: ::::::	AUCCUUAUCCUCCGUAGUCCUU
chr3A:478220-478987(-)	677-698	3.5	zma-miR2118g/	22	UCGGCUUGGGAGGCAUCAGGAA	: :: :.::::::::::::::	AUCCUUAUCCUCCGUAGUCCUU
chr3A:646288437-646288961(+)	427-448	3	zma-miR2118g/	22	UAGGAAUAGGAGGCAUUGGGGA	::::::::::::::::..::.:	AUCCUUAUCCUCCGUAGUCCUU
chr3A:705275864-705276671(+)	698-719	3	zma-miR2118g/	22	UGGGAGUAGGAGGCAUCCGGAA	:.:::.::::::::::: ::::	AUCCUUAUCCUCCGUAGUCCUU
chr3A:706646156-706646816(+)	572-593	3.5	zma-miR2118g/	22	UAUGAAUGGGAGGCAUCUGGAA	:: ::::.::::::::: ::::	AUCCUUAUCCUCCGUAGUCCUU
chr3A:709700959-709701644(-)	595-616	4	zma-miR2118g/	22	UAGGAAUAUGAGACAUCAGGAC	:::::::: ::: ::::::::	AUCCUUAUCCUCCGUAGUCCUU
chr3A:710246624-710247496(-)	782-803	4	zma-miR2118g/	22	UGGGAAUAUGAGACAUCAGGAG	:.:::::: ::: ::::::::.	AUCCUUAUCCUCCGUAGUCCUU
chr3A:710261365-710262175(-)	720-741	4	zma-miR2118g/	22	UAGGAAUGUGAGACAUCAGGAG	:::::::. ::: ::::::::.	AUCCUUAUCCUCCGUAGUCCUU
chr3A:710267688-710268390(-)	614-635	4	zma-miR2118g/	22	GGGGAAUAGGAGGCAUCAUGAG	.:::::::::::::::: ::.	AUCCUUAUCCUCCGUAGUCCUU
chr3B:20071819-20072548(-)	641-662	3	zma-miR2118g/	22	GAGGAAUGAGAGGCAUCAGGAG	::::::. ::::::::::::.	AUCCUUAUCCUCCGUAGUCCUU
chr3B:33969598-33970281(-)	574-595	1.5	zma-miR2118g/	22	UAGGAGUAGGAGGCAUCGGGAA	:::::.:::::::::::.::::	AUCCUUAUCCUCCGUAGUCCUU
chr3B:34008115-34008942(-)	737-758	3	zma-miR2118g/	22	UAGGAUUAGGAGGCAUCAGAAA	::::: ::::::::::::: ::	AUCCUUAUCCUCCGUAGUCCUU
chr3B:34043691-34044346(-)	546-567	3	zma-miR2118g/	22	UAGGAGUAGGAGGCAUCAGUAG	:::::.::::::::::::: :.	AUCCUUAUCCUCCGUAGUCCUU
chr3B:34115749-34116236(-)	258-279	4	zma-miR2118g/	22	UAGGAGUAGGAGGCAUCGGUAG	:::::.:::::::::::.: :.	AUCCUUAUCCUCCGUAGUCCUU
chr3B:34115749-34116236(-)	397-418	3	zma-miR2118g/	22	UAGGAGUAGGAGGCAUCAGUAG	:::::.::::::::::::: :.	AUCCUUAUCCUCCGUAGUCCUU
chr3B:34143884-34144419(-)	466-487	2.5	zma-miR2118g/	22	UAGGAGUAGGAGGCAUCAGCAA	:::::.::::::::::::: ::	AUCCUUAUCCUCCGUAGUCCUU
chr3B:41152926-41153620(-)	530-551	4	zma-miR2118g/	22	UGGAAUUGGGGGGCAUCAGGAA	:.: : :.::.:::::::::::	AUCCUUAUCCUCCGUAGUCCUU
chr3B:41585935-41586513(-)	509-530	4	zma-miR2118g/	22	UAGGAAAAGGAGGCACCGGGAA	:::::: :::::::: :.::::	AUCCUUAUCCUCCGUAGUCCUU
chr3B:42550417-42551268(+)	761-782	3	zma-miR2118g/	22	UAGGAAAAGGAGGCAGCAGGAA	:::::: :::::::: ::::::	AUCCUUAUCCUCCGUAGUCCUU
chr3B:683783443-683784296(-)	763-784	3.5	zma-miR2118g/	22	UAGGACUGCGAGGCGUCAGGAA	::::: :. :::::.:::::::	AUCCUUAUCCUCCGUAGUCCUU
chr3B:684044845-684045724(-)	781-802	4	zma-miR2118g/	22	UAGAAUUAGGAGGCAUUGGGAA	::: : ::::::::::..::::	AUCCUUAUCCUCCGUAGUCCUU
chr3B:684048689-684049405(-)	626-647	4	zma-miR2118g/	22	UAGGAUUAUGAGGCGUCGGGAA	::::: :: :::::.::.::::	AUCCUUAUCCUCCGUAGUCCUU
chr3B:684051112-684052005(-)	803-824	3	zma-miR2118g/	22	UAGAAUUAGGAGGCAUCGGGAA	::: : :::::::::::.::::	AUCCUUAUCCUCCGUAGUCCUU
chr3B:706985072-706985711(+)	530-551	2.5	zma-miR2118g/	22	AGGGAAUAUGAGGCAUCAGGAA	.:::::: :::::::::::::	AUCCUUAUCCUCCGUAGUCCUU
chr3B:7248281-7248833(-)	406-427	3.5	zma-miR2118g/	22	UGGGAACAGGAGGCUUCAGGAA	:.:::: ::::::: :::::::	AUCCUUAUCCUCCGUAGUCCUU
chr3B:7305164-7305617(-)	363-384	4	zma-miR2118g/	22	UGGGAACAGGAGGCUUCAGGAG	:.:::: ::::::: ::::::.	AUCCUUAUCCUCCGUAGUCCUU
chr3B:7307873-7308304(-)	343-364	2.5	zma-miR2118g/	22	UGGGAACAGGAGGCGUCAGGAA	:.:::: :::::::.:::::::	AUCCUUAUCCUCCGUAGUCCUU
chr3B:758067250-758067825(-)	466-487	4	zma-miR2118g/	22	UUGGACUAAGAGGCAUCGGGAA	: ::: :: ::::::::.::::	AUCCUUAUCCUCCGUAGUCCUU
chr3B:758413814-758414415(+)	532-553	3.5	zma-miR2118g/	22	UUGGAAUGGGAGGCACCAGGAA	: :::::.::::::: ::::::	AUCCUUAUCCUCCGUAGUCCUU
chr3B:758457686-758458138(-)	362-383	3	zma-miR2118g/	22	UUGGACUAGGAGGCAUCAGGGA	: ::: ::::::::::::::.:	AUCCUUAUCCUCCGUAGUCCUU
chr3B:758719813-758720391(-)	488-509	4	zma-miR2118g/	22	UUGGACCAGGAGGCAUCAGGGA	: ::: :::::::::::::.:	AUCCUUAUCCUCCGUAGUCCUU
chr3B:758816826-758817407(-)	533-554	4	zma-miR2118g/	22	UUGGAAUAGAAGGCAUCGGGAA	: ::::::: :::::::.::::	AUCCUUAUCCUCCGUAGUCCUU
chr3B:759061412-759061969(-)	467-488	4	zma-miR2118g/	22	UUGGACCAGGAGGCAUCAGGGA	: ::: :::::::::::::.:	AUCCUUAUCCUCCGUAGUCCUU
chr3B:762776285-762776718(+)	301-322	4	zma-miR2118g/	22	UGGGAAUGUGAGGCAUCCGGAA	:.:::::. :::::::: ::::	AUCCUUAUCCUCCGUAGUCCUU
chr3B:763807377-763807938(+)	472-493	4	zma-miR2118g/	22	UGGGAAUAUGAGACAUCAGGAG	:.:::::: ::: ::::::::.	AUCCUUAUCCUCCGUAGUCCUU
chr3B:763936686-763937493(+)	698-719	4	zma-miR2118g/	22	UGGGAAUAUGAGACAUCAGGAG	:.:::::: ::: ::::::::.	AUCCUUAUCCUCCGUAGUCCUU
chr3B:764185654-764186274(+)	511-532	3	zma-miR2118g/	22	UGGGAAUAGGAGACAUCAGGAG	:.:::::::::: ::::::::.	AUCCUUAUCCUCCGUAGUCCUU
chr3B:764234891-764235574(+)	593-614	3.5	zma-miR2118g/	22	UAGGAAUAUGAGACAUCAGGAG	:::::::: ::: ::::::::.	AUCCUUAUCCUCCGUAGUCCUU
chr3B:764272635-764273383(+)	658-679	4	zma-miR2118g/	22	UGGGAAUAUGAGACAUCAGGAG	:.:::::: ::: ::::::::.	AUCCUUAUCCUCCGUAGUCCUU
chr3B:764295670-764296099(+)	320-341	4	zma-miR2118g/	22	UGGGAAUAAGAGACAUCAGGAG	:.:::::: ::: ::::::::.	AUCCUUAUCCUCCGUAGUCCUU
chr3B:764367561-764368092(+)	443-464	3.5	zma-miR2118g/	22	UAGGAAUAUGAGACAUCAGGAG	:::::::: ::: ::::::::.	AUCCUUAUCCUCCGUAGUCCUU
chr3B:764390487-764391171(+)	575-596	4	zma-miR2118g/	22	UGGGAAUAGGAGACAUCGGGAG	:.:::::::::: ::::.:::.	AUCCUUAUCCUCCGUAGUCCUU
chr3B:764426243-764426777(+)	425-446	3	zma-miR2118g/	22	UGGGAAUAGGAGACAUCAGGAG	:.:::::::::: ::::::::.	AUCCUUAUCCUCCGUAGUCCUU
chr3B:775546987-775547806(+)	731-752	4	zma-miR2118g/	22	UAUGAUUAGGAGGUAUCAGGGA	:: :: :::::::.::::::.:	AUCCUUAUCCUCCGUAGUCCUU
chr3B:776045357-776046083(+)	658-679	4	zma-miR2118g/	22	UAGGAUUAGGAGGCGUUGGGAA	::::: ::::::::.:..::::	AUCCUUAUCCUCCGUAGUCCUU
chr3B:777656741-777657366(+)	535-556	3.5	zma-miR2118g/	22	UAGGAGUAGGAGGCAUGGGGAA	:::::.:::::::::: .::::	AUCCUUAUCCUCCGUAGUCCUU
chr3B:777658789-777659346(+)	467-488	3.5	zma-miR2118g/	22	UUGGAGUAGGAGGCAUGAGGAA	: :::.:::::::::: :::::	AUCCUUAUCCUCCGUAGUCCUU
chr3B:777660641-777661135(+)	404-425	3.5	zma-miR2118g/	22	UAGGAGUAUGAGGCAUGAGGAA	:::::.:: ::::::: :::::	AUCCUUAUCCUCCGUAGUCCUU
chr3B:777758493-777759092(+)	509-530	3.5	zma-miR2118g/	22	UAGGAGUAGGAGGCACUAGGAA	:::::.::::::::: .:::::	AUCCUUAUCCUCCGUAGUCCUU
chr3B:777760328-777760898(+)	480-501	2.5	zma-miR2118g/	22	UAGGAGUAGGAGGCAUGAGGAA	:::::.:::::::::: :::::	AUCCUUAUCCUCCGUAGUCCUU
chr3B:777812000-777812492(+)	383-404	2.5	zma-miR2118g/	22	UAGGAGUAGGAGGCAUGAGGAA	:::::.:::::::::: :::::	AUCCUUAUCCUCCGUAGUCCUU
chr3B:778142898-778143625(-)	637-658	4	zma-miR2118g/	22	UAGUAUUAGGAGGCAUUGGGAA	::: : ::::::::::..::::	AUCCUUAUCCUCCGUAGUCCUU
chr3D:13813268-13813993(-)	678-699	3.5	zma-miR2118g/	22	GAGGGAUGAGAGGCAUCAGGAG	:::.::. ::::::::::::.	AUCCUUAUCCUCCGUAGUCCUU
chr3D:20035204-20035908(-)	616-637	3	zma-miR2118g/	22	UAGGAAUUGGAGGCAUCAGAAA	::::::: ::::::::::: ::	AUCCUUAUCCUCCGUAGUCCUU
chr3D:20136414-20137033(-)	531-552	3.5	zma-miR2118g/	22	UAGGAGUUGGAGGCAUCAGAAA	:::::.: ::::::::::: ::	AUCCUUAUCCUCCGUAGUCCUU
chr3D:20230949-20231433(+)	395-415	4	zma-miR2118g/	22	UAGGACUAGGAGGCA-CAGGGA	::::: ::::::::: ::::.:	AUCCUUAUCCUCCGUAGUCCUU
chr3D:20242941-20243622(-)	593-614	3.5	zma-miR2118g/	22	UAGGAGUUGGAGGCAUCAGAAA	:::::.: ::::::::::: ::	AUCCUUAUCCUCCGUAGUCCUU
chr3D:20320409-20321190(-)	617-638	3	zma-miR2118g/	22	UAGGAAUUGGAGGCAUCAGAAA	::::::: ::::::::::: ::	AUCCUUAUCCUCCGUAGUCCUU
chr3D:20815494-20816114(-)	532-553	3.5	zma-miR2118g/	22	UAGGAGUUGGAGUCAUCAGGAA	:::::.: :::: :::::::::	AUCCUUAUCCUCCGUAGUCCUU
chr3D:20895270-20896014(-)	656-677	3.5	zma-miR2118g/	22	UAGGAGUUGGAAGCAUCAGGAA	:::::.: ::: ::::::::::	AUCCUUAUCCUCCGUAGUCCUU
chr3D:20913955-20914535(-)	490-511	2	zma-miR2118g/	22	UAGGAGUGGGAGGCGUCAGGAA	:::::.:.::::::.:::::::	AUCCUUAUCCUCCGUAGUCCUU
chr3D:20929975-20930511(-)	446-467	2	zma-miR2118g/	22	UAGGAGUGGGAGGCGUCAGGAA	:::::.:.::::::.:::::::	AUCCUUAUCCUCCGUAGUCCUU
chr3D:21002741-21003237(-)	406-427	2.5	zma-miR2118g/	22	UAAGAGUAGGAGGUAUCAGGAA	:: ::.:::::::.::::::::	AUCCUUAUCCUCCGUAGUCCUU
chr3D:21588956-21589637(+)	572-593	3.5	zma-miR2118g/	22	UGGGGAUGGGAGGCUUCAGGAA	:.::.::.:::::: :::::::	AUCCUUAUCCUCCGUAGUCCUU
chr3D:23732801-23733589(+)	700-721	3	zma-miR2118g/	22	UAGGAAAAGGAGACAUCAGGAA	:::::: ::::: :::::::::	AUCCUUAUCCUCCGUAGUCCUU
chr3D:24126793-24127516(+)	635-656	2	zma-miR2118g/	22	UAGGAAAAGGAGGCAUCGGGAA	:::::: ::::::::::.::::	AUCCUUAUCCUCCGUAGUCCUU
chr3D:24441373-24441953(+)	490-511	4	zma-miR2118g/	22	UAGGCUUCAGAGGCAUCAGGAA	:::: : :::::::::::::	AUCCUUAUCCUCCGUAGUCCUU
chr3D:24528516-24529428(+)	803-824	4	zma-miR2118g/	22	UAGGAAAAGGAGGCACCGGGAA	:::::: :::::::: :.::::	AUCCUUAUCCUCCGUAGUCCUU
chr3D:24614503-24615103(+)	510-531	3	zma-miR2118g/	22	UGGAAUUGGGAGGCAUCAGGAA	:.: : :.::::::::::::::	AUCCUUAUCCUCCGUAGUCCUU
chr3D:25109482-25110273(+)	625-646	3	zma-miR2118g/	22	UAGGAAAAGGAGGCACCAGGAA	:::::: :::::::: ::::::	AUCCUUAUCCUCCGUAGUCCUU
chr3D:535552580-535553077(+)	449-470	2.5	zma-miR2118g/	22	AGGGAAUAUGAGGCAUCAGGAA	.:::::: :::::::::::::	AUCCUUAUCCUCCGUAGUCCUU
chr3D:571142878-571143801(-)	679-700	3	zma-miR2118g/	22	UUGGACUAGGAGGCAUCAGGAU	: ::: :::::::::::::::	AUCCUUAUCCUCCGUAGUCCUU
chr3D:572194899-572195435(-)	446-467	3.5	zma-miR2118g/	22	UAUGAAUGGGAGGCAUCUGGAA	:: ::::.::::::::: ::::	AUCCUUAUCCUCCGUAGUCCUU
chr3D:574434066-574434874(-)	720-741	3.5	zma-miR2118g/	22	UAGGAAUAUGAGACAUCAGGAG	:::::::: ::: ::::::::.	AUCCUUAUCCUCCGUAGUCCUU
chr3D:574441489-574442086(-)	509-530	3.5	zma-miR2118g/	22	UAGGAAUAUGAGACAUCAGGAG	:::::::: ::: ::::::::.	AUCCUUAUCCUCCGUAGUCCUU
chr3D:574522041-574522659(-)	530-551	3	zma-miR2118g/	22	UGGGAAUAGGAGCCAUCAGGAG	:.:::::::::: ::::::::.	AUCCUUAUCCUCCGUAGUCCUU
chr3D:574531505-574532125(-)	530-551	4	zma-miR2118g/	22	UGGGAAUACGAGACAUCAGGAG	:.:::::: ::: ::::::::.	AUCCUUAUCCUCCGUAGUCCUU
chr3D:575132328-575132950(+)	555-576	4	zma-miR2118g/	22	GGGGAAUAGGAGGCAUCAUGAG	.:::::::::::::::: ::.	AUCCUUAUCCUCCGUAGUCCUU
chr3D:575329245-575329783(-)	448-469	4	zma-miR2118g/	22	UGGGAAUAUGAGACAUCAGGAG	:.:::::: ::: ::::::::.	AUCCUUAUCCUCCGUAGUCCUU
chr3D:575347940-575348770(-)	740-761	4	zma-miR2118g/	22	UGGGAAUAUGAGACAUCAGGAG	:.:::::: ::: ::::::::.	AUCCUUAUCCUCCGUAGUCCUU
chr3D:580906955-580907449(-)	385-406	2.5	zma-miR2118g/	22	UAGGAGUAGGAGGCAUGAGGAA	:::::.:::::::::: :::::	AUCCUUAUCCUCCGUAGUCCUU
chr3D:580976690-580977375(-)	595-616	2.5	zma-miR2118g/	22	UAGGAGUAGGAGGCAUGAGGAA	:::::.:::::::::: :::::	AUCCUUAUCCUCCGUAGUCCUU
chr3D:580985038-580985991(-)	844-865	2.5	zma-miR2118g/	22	UAGGAGUAGGAGGCAUGAGGAA	:::::.:::::::::: :::::	AUCCUUAUCCUCCGUAGUCCUU
chr3D:580989497-580990139(-)	552-573	2.5	zma-miR2118g/	22	UAGGAGUAGGAGGCAUGAGGAA	:::::.:::::::::: :::::	AUCCUUAUCCUCCGUAGUCCUU
chr3D:580998537-580999222(-)	595-616	2.5	zma-miR2118g/	22	UAGGAGUAGGAGGCAUGAGGAA	:::::.:::::::::: :::::	AUCCUUAUCCUCCGUAGUCCUU
chr3D:581010305-581010995(-)	602-623	3.5	zma-miR2118g/	22	UAGGAGGAGGAGGCAUGAGGAA	:::::. ::::::::: :::::	AUCCUUAUCCUCCGUAGUCCUU
chr3D:581020622-581021075(-)	365-386	3.5	zma-miR2118g/	22	UAGGAGUAUGAGGCAUGAGGAA	:::::.:: ::::::: :::::	AUCCUUAUCCUCCGUAGUCCUU
chr3D:581076329-581076930(-)	511-532	2.5	zma-miR2118g/	22	UAGGAGUAGGAGGCAUGAGGAA	:::::.:::::::::: :::::	AUCCUUAUCCUCCGUAGUCCUU
chr3D:6222638-6223424(+)	677-698	4	zma-miR2118g/	22	CAGGAGUGGGAGGCAUCAGAAA	::::.:.::::::::::: ::	AUCCUUAUCCUCCGUAGUCCUU
chr3D:6328612-6329263(+)	542-563	3.5	zma-miR2118g/	22	UGGGAACAGGAGGCUUCAGGAA	:.:::: ::::::: :::::::	AUCCUUAUCCUCCGUAGUCCUU
chr4A:589800229-589800618(-)	322-343	4	zma-miR2118g/	22	UAAGGAUGGGAGGCAUCGGGGA	:: :.::.:::::::::.::.:	AUCCUUAUCCUCCGUAGUCCUU
chr4A:589838779-589839335(-)	447-468	3.5	zma-miR2118g/	22	UAAGAAUGGGAGGCAUCGGGGA	:: ::::.:::::::::.::.:	AUCCUUAUCCUCCGUAGUCCUU
chr4A:589912840-589913609(+)	679-700	3.5	zma-miR2118g/	22	UGAGUAUGGGAGGCAUCAGGAG	:. : ::.:::::::::::::.	AUCCUUAUCCUCCGUAGUCCUU
chr4A:632785383-632786192(+)	740-761	2.5	zma-miR2118g/	22	UAGCAAUGGGAGGCAUCGGGAA	::: :::.:::::::::.::::	AUCCUUAUCCUCCGUAGUCCUU
chr4A:642598636-642599425(+)	699-720	3.5	zma-miR2118g/	22	UAGGAAUCGGAGACAUCAGGAG	::::::: :::: ::::::::.	AUCCUUAUCCUCCGUAGUCCUU
chr4A:644461842-644462524(-)	594-615	4	zma-miR2118g/	22	UAGGACUAGGAAGCAUCAGGAU	::::: ::::: :::::::::	AUCCUUAUCCUCCGUAGUCCUU
chr4A:644661399-644662031(-)	542-563	4	zma-miR2118g/	22	UAGGACUAGGAAGCAUCAGGAU	::::: ::::: :::::::::	AUCCUUAUCCUCCGUAGUCCUU
chr4A:644712002-644712358(-)	266-287	4	zma-miR2118g/	22	UAGGACUAGGAAGCAUCAGGAU	::::: ::::: :::::::::	AUCCUUAUCCUCCGUAGUCCUU
chr4A:645071119-645071634(-)	425-446	4	zma-miR2118g/	22	UAGGAUUAGGAAGCAUCAGGAU	::::: ::::: :::::::::	AUCCUUAUCCUCCGUAGUCCUU
chr4A:645107777-645108520(-)	634-655	4	zma-miR2118g/	22	UAGGACUAGGAAGCAUCAGGAU	::::: ::::: :::::::::	AUCCUUAUCCUCCGUAGUCCUU
chr4A:645160951-645161572(-)	531-552	4	zma-miR2118g/	22	UAGGAUUAGGAAGCAUCAGGAU	::::: ::::: :::::::::	AUCCUUAUCCUCCGUAGUCCUU
chr4A:648590065-648590652(-)	478-499	2	zma-miR2118g/	22	UAGGAAUAGGAGGCAGCAGGAA	::::::::::::::: ::::::	AUCCUUAUCCUCCGUAGUCCUU
chr4A:650950717-650951402(-)	616-637	4	zma-miR2118g/	22	AUGGAAUAAGAGGCAUCGGGAA	:::::: ::::::::.::::	AUCCUUAUCCUCCGUAGUCCUU
chr4A:672164368-672164990(-)	533-554	2.5	zma-miR2118g/	22	UGGGAAUAGGAGGCGUCGGGAA	:.::::::::::::.::.::::	AUCCUUAUCCUCCGUAGUCCUU
chr4A:686636623-686637265(-)	552-573	4	zma-miR2118g/	22	UGGGAAUUGGAGGCAUCAGAAG	:.::::: ::::::::::: :.	AUCCUUAUCCUCCGUAGUCCUU
chr4A:686927123-686927766(-)	553-574	3	zma-miR2118g/	22	UAGGAUUAGGAGGCAUUGGGAA	::::: ::::::::::..::::	AUCCUUAUCCUCCGUAGUCCUU
chr4A:688765106-688765780(-)	583-604	3	zma-miR2118g/	22	UGGGAAUACGAGGCAUCGGGAG	:.:::::: ::::::::.:::.	AUCCUUAUCCUCCGUAGUCCUU
chr4A:688852642-688853160(-)	428-449	3	zma-miR2118g/	22	UGGGAAUACGAGGCAUCGGGAG	:.:::::: ::::::::.:::.	AUCCUUAUCCUCCGUAGUCCUU
chr4A:688964725-688965410(-)	595-616	3	zma-miR2118g/	22	UGGGAACCGGAGGCAUCAGGAG	:.:::: :::::::::::::.	AUCCUUAUCCUCCGUAGUCCUU
chr4A:688968518-688969056(-)	448-469	3.5	zma-miR2118g/	22	UAGGAAUAAGAGGCAUCAGAAG	:::::::: :::::::::: :.	AUCCUUAUCCUCCGUAGUCCUU
chr4A:692355614-692356487(-)	825-846	3.5	zma-miR2118g/	22	UGGGAAUUGGAGGCAUCCGGAA	:.::::: ::::::::: ::::	AUCCUUAUCCUCCGUAGUCCUU
chr4A:694944767-694945681(-)	824-845	3	zma-miR2118g/	22	UAGGAAUUAGAGGCAUCAGGAC	::::::: ::::::::::::	AUCCUUAUCCUCCGUAGUCCUU
chr4A:698090775-698091376(-)	511-532	3.5	zma-miR2118g/	22	UAUGACUGGGAGGCAUCGGGAA	:: :: :.:::::::::.::::	AUCCUUAUCCUCCGUAGUCCUU
chr4A:719680833-719681537(-)	614-635	4	zma-miR2118g/	22	AGGGGAUAUGAGGCAUCGGGAA	.::.::: ::::::::.::::	AUCCUUAUCCUCCGUAGUCCUU
chr4A:720163121-720163806(+)	593-614	3.5	zma-miR2118g/	22	UAGGGUUAGGAGGUAUUAGGAA	::::. :::::::.::.:::::	AUCCUUAUCCUCCGUAGUCCUU
chr4A:720959510-720960107(+)	530-551	3.5	zma-miR2118g/	22	UGGGAAUAAGAGGCAUUGGGAA	:.:::::: :::::::..::::	AUCCUUAUCCUCCGUAGUCCUU
chr4A:723798928-723799464(-)	446-467	1.5	zma-miR2118g/	22	UGAGAAUAGGAGGCAUCAGGAA	:. :::::::::::::::::::	AUCCUUAUCCUCCGUAGUCCUU
chr4A:723824480-723824993(-)	425-446	3.5	zma-miR2118g/	22	UGGGACUUGGAGGCAUCAGGAU	:.::: : :::::::::::::	AUCCUUAUCCUCCGUAGUCCUU
chr4B:22956838-22957320(-)	392-413	4	zma-miR2118g/	22	UGAGCAUGGGAGGCAUCAGGAU	:. : ::.:::::::::::::	AUCCUUAUCCUCCGUAGUCCUU
chr4B:23382509-23383382(+)	783-804	4	zma-miR2118g/	22	UAAGGUUGGGAGGCAUCAGGGA	:: :. :.::::::::::::.:	AUCCUUAUCCUCCGUAGUCCUU
chr4B:35210441-35211137(-)	606-627	4	zma-miR2118g/	22	UGGGCAUGAGAGGCAUUAGGAA	:.:: ::. :::::::.:::::	AUCCUUAUCCUCCGUAGUCCUU
chr4D:12550357-12551171(-)	723-744	4	zma-miR2118g/	22	UAAGCAUGGGAGGCAUCGGGAG	:: : ::.:::::::::.:::.	AUCCUUAUCCUCCGUAGUCCUU
chr4D:12670776-12671207(+)	364-385	4	zma-miR2118g/	22	UAAGGAUGGGAGGCAUCGGGGA	:: :.::.:::::::::.::.:	AUCCUUAUCCUCCGUAGUCCUU
chr4D:23220754-23221313(+)	490-511	4	zma-miR2118g/	22	UGGGCAUGAGAGGCAUUAGGAA	:.:: ::. :::::::.:::::	AUCCUUAUCCUCCGUAGUCCUU
chr5A:11527957-11528587(-)	448-469	4	zma-miR2118g/	22	UAGGCAUAGAAGGCAUCGGGAA	:::: :::: :::::::.::::	AUCCUUAUCCUCCGUAGUCCUU
chr5A:12015509-12016152(-)	553-574	3.5	zma-miR2118g/	22	UAGGCAUGCGAGGCAUCAGGAU	:::: ::. ::::::::::::	AUCCUUAUCCUCCGUAGUCCUU
chr5A:12031731-12032246(-)	425-446	3.5	zma-miR2118g/	22	UAGGCAUGCGAGGCAUCAGGAU	:::: ::. ::::::::::::	AUCCUUAUCCUCCGUAGUCCUU
chr5A:17390170-17390815(+)	574-595	4	zma-miR2118g/	22	UAGGCAUAGAAGGCGUCAGGAA	:::: :::: ::::.:::::::	AUCCUUAUCCUCCGUAGUCCUU
chr5A:17436915-17437617(+)	614-635	4	zma-miR2118g/	22	UUGGCAUAGGAGGCUUCAGGAA	: :: ::::::::: :::::::	AUCCUUAUCCUCCGUAGUCCUU
chr5A:34710102-34710619(+)	427-448	3	zma-miR2118g/	22	UAGAAAUUGGAGGCGUCAGGAA	::: ::: ::::::.:::::::	AUCCUUAUCCUCCGUAGUCCUU
chr5A:356134792-356135349(+)	469-490	3.5	zma-miR2118g/	22	UGGGAACAGGAGGCACCAGGAA	:.:::: :::::::: ::::::	AUCCUUAUCCUCCGUAGUCCUU
chr5A:555181678-555182199(+)	433-454	4	zma-miR2118g/	22	UAGGAUUAGGAGGCAUGAGGGA	::::: :::::::::: :::.:	AUCCUUAUCCUCCGUAGUCCUU
chr5A:555232698-555233234(-)	509-530	3.5	zma-miR2118g/	22	UUGGAGUUGGAGGCAUCAGGAU	: :::.: :::::::::::::	AUCCUUAUCCUCCGUAGUCCUU
chr5A:559089639-559090259(-)	530-551	3.5	zma-miR2118g/	22	UAGGACUGGGAGGCACCAGGAA	::::: :.::::::: ::::::	AUCCUUAUCCUCCGUAGUCCUU
chr5A:564430621-564431281(+)	551-572	3	zma-miR2118g/	22	UAGGAAUAGGAGGCUUUAGGAA	:::::::::::::: :.:::::	AUCCUUAUCCUCCGUAGUCCUU
chr5A:566634865-566635569(+)	635-656	4	zma-miR2118g/	22	UAGGAAUAUGAGGUAUUGGGAA	:::::::: ::::.::..::::	AUCCUUAUCCUCCGUAGUCCUU
chr5A:570519326-570519967(-)	551-572	4	zma-miR2118g/	22	UGGGAACGAGAGGUAUCAGGAA	:.:::: . ::::.::::::::	AUCCUUAUCCUCCGUAGUCCUU
chr5A:600929339-600929959(+)	511-532	3.5	zma-miR2118g/	22	UAGGAAUGGGAGGCAACAGGAC	:::::::.::::::: :::::	AUCCUUAUCCUCCGUAGUCCUU
chr5A:601151498-601152294(+)	705-726	4	zma-miR2118g/	22	UAGGAAUGGGAGGCAACGGGAG	:::::::.::::::: :.:::.	AUCCUUAUCCUCCGUAGUCCUU
chr5A:601196155-601196983(+)	740-761	4	zma-miR2118g/	22	UAAGAAUGGUAGGCAUCAGGAG	:: ::::.: :::::::::::.	AUCCUUAUCCUCCGUAGUCCUU
chr5A:601750444-601751150(+)	616-637	4	zma-miR2118g/	22	UGGGAAUGAGUGGCAUCAGGAA	:.:::::. : :::::::::::	AUCCUUAUCCUCCGUAGUCCUU
chr5A:619776293-619777143(+)	760-781	4	zma-miR2118g/	22	UAGGAGUGAGAUGCAUCAGGAA	:::::.:. :: ::::::::::	AUCCUUAUCCUCCGUAGUCCUU
chr5A:641114630-641115523(+)	805-826	4	zma-miR2118g/	22	UAAGAAGAGGAGGCAUCUGGAA	:: ::: :::::::::: ::::	AUCCUUAUCCUCCGUAGUCCUU
chr5B:13698453-13699010(-)	467-488	3	zma-miR2118g/	22	UAGGCAUAGGAGGCACCAGGAA	:::: :::::::::: ::::::	AUCCUUAUCCUCCGUAGUCCUU
chr5B:13814598-13815386(-)	698-719	4	zma-miR2118g/	22	UGAGCAUGAGAGGCAUCAGGAA	:. : ::. :::::::::::::	AUCCUUAUCCUCCGUAGUCCUU
chr5B:304275955-304276716(+)	652-673	3.5	zma-miR2118g/	22	UGGGAAUAUGAGGCAUUGGGAA	:.:::::: :::::::..::::	AUCCUUAUCCUCCGUAGUCCUU
chr5B:539303121-539303741(-)	530-551	2	zma-miR2118g/	22	UAGGGCUGGGAGGCAUCAGGAA	::::. :.::::::::::::::	AUCCUUAUCCUCCGUAGUCCUU
chr5B:547141415-547142141(+)	636-657	3	zma-miR2118g/	22	UCGGAAUAGGAGGCAUUGGGAA	: ::::::::::::::..::::	AUCCUUAUCCUCCGUAGUCCUU
chr5B:547272874-547273515(+)	551-572	3	zma-miR2118g/	22	UAGGAUUAUGAGGCAUUAGGAA	::::: :: :::::::.:::::	AUCCUUAUCCUCCGUAGUCCUU
chr5B:548141833-548142663(+)	740-761	4	zma-miR2118g/	22	UAGGAUUUGGAGGCGUCGGGAA	::::: : ::::::.::.::::	AUCCUUAUCCUCCGUAGUCCUU
chr5B:591475991-591476634(+)	595-616	4	zma-miR2118g/	22	UUGGAAUAAGCGGCAUCAGGAA	: :::::: : :::::::::::	AUCCUUAUCCUCCGUAGUCCUU
chr5B:591583038-591583855(+)	650-671	4	zma-miR2118g/	22	UGGGAAUGAGCGGCAUCAGGAA	:.:::::. : :::::::::::	AUCCUUAUCCUCCGUAGUCCUU
chr5B:596501844-596502987(+)	1034-1055	3.5	zma-miR2118g/	22	UGGGAAUAAGAGACAUCAGGAA	:.:::::: ::: :::::::::	AUCCUUAUCCUCCGUAGUCCUU
chr5B:599601103-599602027(-)	834-855	4	zma-miR2118g/	22	UGAGAAUGGAAGGCAUCAGGAA	:. ::::.: ::::::::::::	AUCCUUAUCCUCCGUAGUCCUU
chr5B:636933656-636934234(+)	490-511	4	zma-miR2118g/	22	UUGGAUUAGGAGGCAUGAGGAA	: ::: :::::::::: :::::	AUCCUUAUCCUCCGUAGUCCUU
chr5B:643939802-643940613(+)	721-742	3	zma-miR2118g/	22	UAGGAAGAGGAGGCAUCUGGAA	:::::: :::::::::: ::::	AUCCUUAUCCUCCGUAGUCCUU
chr5B:672165173-672165971(-)	689-710	3	zma-miR2118g/	22	UAGGUGUGCGAGGCAUCAGGAA	:::: .:. :::::::::::::	AUCCUUAUCCUCCGUAGUCCUU
chr5B:674495827-674496447(+)	530-551	4	zma-miR2118g/	22	UAGGCGUGUGAGGCAUCAGGAU	:::: .:. ::::::::::::	AUCCUUAUCCUCCGUAGUCCUU
chr5B:677924837-677925653(-)	656-677	2.5	zma-miR2118g/	22	UAGCAAUGGGAGGCAUCGGGAA	::: :::.:::::::::.::::	AUCCUUAUCCUCCGUAGUCCUU
chr5D:268534057-268534676(+)	511-532	2.5	zma-miR2118g/	22	UGGGAAUAGGAGGCAUUGGGAA	:.::::::::::::::..::::	AUCCUUAUCCUCCGUAGUCCUU
chr5D:434597576-434598301(+)	635-656	4	zma-miR2118g/	22	UGGGAUUGGGAGGCAACAGGAA	:.::: :.::::::: ::::::	AUCCUUAUCCUCCGUAGUCCUU
chr5D:434829224-434829697(-)	383-404	4	zma-miR2118g/	22	UAGGACUAGGAGGCAACAGGGA	::::: ::::::::: ::::.:	AUCCUUAUCCUCCGUAGUCCUU
chr5D:438847666-438848221(+)	467-488	3.5	zma-miR2118g/	22	UAGGUGUUGGAGGCAUCAGGGA	:::: .: ::::::::::::.:	AUCCUUAUCCUCCGUAGUCCUU
chr5D:443016483-443017061(-)	488-509	2	zma-miR2118g/	22	UAGGGCUGGGAGGCAUCAGGAA	::::. :.::::::::::::::	AUCCUUAUCCUCCGUAGUCCUU
chr5D:447978060-447978830(+)	680-701	3	zma-miR2118g/	22	UCGGAAUAGGAGGCAUUGGGAA	: ::::::::::::::..::::	AUCCUUAUCCUCCGUAGUCCUU
chr5D:451688030-451688923(-)	784-805	2.5	zma-miR2118g/	22	UAGGAAGGAGAGGCAUCAGGAA	:::::: . :::::::::::::	AUCCUUAUCCUCCGUAGUCCUU
chr5D:482012802-482013559(+)	667-688	4	zma-miR2118g/	22	UUGGAAUAAGCGGCAUCAGGAA	: :::::: : :::::::::::	AUCCUUAUCCUCCGUAGUCCUU
chr5D:482416909-482417448(+)	449-470	4	zma-miR2118g/	22	UGGGAAUGAGUGGCAUCAGGAA	:.:::::. : :::::::::::	AUCCUUAUCCUCCGUAGUCCUU
chr5D:482762019-482762828(-)	719-740	4	zma-miR2118g/	22	UGGCAAUGGGAGGUGUCAGGAA	:.: :::.:::::..:::::::	AUCCUUAUCCUCCGUAGUCCUU
chr5D:495348826-495349709(-)	794-814	3.5	zma-miR2118g/	22	UGAGAAUAGGAGGCAUC-GGAA	:. :::::::::::::: ::::	AUCCUUAUCCUCCGUAGUCCUU
chr5D:495789121-495789825(+)	614-635	4	zma-miR2118g/	22	UAGGAGUGAGAUGCAUCAGGAA	:::::.:. :: ::::::::::	AUCCUUAUCCUCCGUAGUCCUU
chr5D:504573205-504573846(+)	532-553	4	zma-miR2118g/	22	UGAGCAUGAGAGGCAUCAGGAA	:. : ::. :::::::::::::	AUCCUUAUCCUCCGUAGUCCUU
chr5D:504720379-504720938(+)	490-511	2	zma-miR2118g/	22	UGGGCAUGGGAGGCAUCAGGAA	:.:: ::.::::::::::::::	AUCCUUAUCCUCCGUAGUCCUU
chr5D:504793092-504793838(+)	677-698	3	zma-miR2118g/	22	UGGGCAUGGGAGGCAUCAGGGA	:.:: ::.::::::::::::.:	AUCCUUAUCCUCCGUAGUCCUU
chr5D:504922604-504923182(+)	509-530	3	zma-miR2118g/	22	UGGGCAUGGGAGGCAUCAGGGA	:.:: ::.::::::::::::.:	AUCCUUAUCCUCCGUAGUCCUU
chr5D:512895061-512895912(+)	763-784	4	zma-miR2118g/	22	UAAGAAGAGGAGGCAUCUGGAA	:: ::: :::::::::: ::::	AUCCUUAUCCUCCGUAGUCCUU
chr5D:513013921-513014646(+)	616-637	4	zma-miR2118g/	22	UAGGAAGAGGAGGUAUCCGGAA	:::::: ::::::.::: ::::	AUCCUUAUCCUCCGUAGUCCUU
chr5D:534095394-534096012(+)	509-530	4	zma-miR2118g/	22	UAGGCGUGUGAGGCAUCAGGAU	:::: .:. ::::::::::::	AUCCUUAUCCUCCGUAGUCCUU
chr6A:24240299-24240875(+)	488-509	2	zma-miR2118g/	22	UGGGAGUAGGAGGCGUCAGGAA	:.:::.::::::::.:::::::	AUCCUUAUCCUCCGUAGUCCUU
chr6A:4734413-4735074(-)	553-573	3	zma-miR2118g/	22	UAAGAAUAGGAGGCAUC-GGAA	:: :::::::::::::: ::::	AUCCUUAUCCUCCGUAGUCCUU
chr6A:575191989-575192735(-)	658-679	4	zma-miR2118g/	22	UAGGAGUUGGAAGCAUCAGGAG	:::::.: ::: :::::::::.	AUCCUUAUCCUCCGUAGUCCUU
chr6A:58765617-58766325(+)	599-620	4	zma-miR2118g/	22	CAUGCUUAGGAGGCAUCAGGAA	: : ::::::::::::::::	AUCCUUAUCCUCCGUAGUCCUU
chr6A:588464484-588465364(-)	640-661	4	zma-miR2118g/	22	UAGGUAUAGGAGACAUCGGGAA	:::: ::::::: ::::.::::	AUCCUUAUCCUCCGUAGUCCUU
chr6A:68974118-68974794(-)	595-616	2	zma-miR2118g/	22	UAGGAAUAGGAGCCAUCAGGAA	:::::::::::: :::::::::	AUCCUUAUCCUCCGUAGUCCUU
chr6A:7097657-7098445(-)	719-740	4	zma-miR2118g/	22	UGGGAGUAAGAGGUAUCGGGAA	:.:::.:: ::::.:::.::::	AUCCUUAUCCUCCGUAGUCCUU
chr6B:102066756-102067395(+)	551-572	3	zma-miR2118g/	22	UAGGCAUAGGAGGCACCAGGAA	:::: :::::::::: ::::::	AUCCUUAUCCUCCGUAGUCCUU
chr6B:124992035-124992767(-)	635-656	1	zma-miR2118g/	22	UAGGAAUAGGAGGCAUCAGGAU	:::::::::::::::::::::	AUCCUUAUCCUCCGUAGUCCUU
chr6B:125341612-125342421(-)	700-721	3	zma-miR2118g/	22	UAGGAAUAGGAGCCAUCAGGAU	:::::::::::: ::::::::	AUCCUUAUCCUCCGUAGUCCUU
chr6B:125346311-125347034(-)	656-677	3.5	zma-miR2118g/	22	UAGAAAUAGGAGCCAUCAGGAG	::: :::::::: ::::::::.	AUCCUUAUCCUCCGUAGUCCUU
chr6B:125360512-125361111(-)	490-511	3.5	zma-miR2118g/	22	UAGGAAUAGGAGUCGUCAGGAG	:::::::::::: :.::::::.	AUCCUUAUCCUCCGUAGUCCUU
chr6B:13647534-13648144(+)	520-541	4	zma-miR2118g/	22	UGGCAGUAGGAGGCGUCAGGGA	:.: :.::::::::.:::::.:	AUCCUUAUCCUCCGUAGUCCUU
chr6B:14632032-14632737(-)	596-617	4	zma-miR2118g/	22	AGGGAGUAGGAGGCACCAGGAA	.:::.::::::::: ::::::	AUCCUUAUCCUCCGUAGUCCUU
chr6B:150497203-150497974(-)	681-702	3.5	zma-miR2118g/	22	AGGGAAUAGGAGGCGUCGGGAA	.::::::::::::.::.::::	AUCCUUAUCCUCCGUAGUCCUU
chr6B:15110674-15111190(-)	426-447	4	zma-miR2118g/	22	AGGGAGUAGGAGGCACCAGGAA	.:::.::::::::: ::::::	AUCCUUAUCCUCCGUAGUCCUU
chr6B:153542998-153543693(+)	605-626	4	zma-miR2118g/	22	UAGGAAUUGGAGGCACUAGGAA	::::::: ::::::: .:::::	AUCCUUAUCCUCCGUAGUCCUU
chr6B:154179166-154179934(+)	701-722	3	zma-miR2118g/	22	UAGGAUUCAGAGGCAUCAGGAA	::::: : :::::::::::::	AUCCUUAUCCUCCGUAGUCCUU
chr6B:154827586-154828333(+)	659-680	4	zma-miR2118g/	22	UAGGAUUUGGAGACAUCAGGAA	::::: : :::: :::::::::	AUCCUUAUCCUCCGUAGUCCUU
chr6B:154833160-154833971(+)	721-742	4	zma-miR2118g/	22	UAGGAAUCGGAGACAUUAGGAA	::::::: :::: :::.:::::	AUCCUUAUCCUCCGUAGUCCUU
chr6B:155196012-155196802(+)	700-721	4	zma-miR2118g/	22	UAGGAAUUGGAGACAUUAGGAA	::::::: :::: :::.:::::	AUCCUUAUCCUCCGUAGUCCUU
chr6B:155198703-155199344(+)	551-572	3	zma-miR2118g/	22	UAGGAUUUGGAGGCAUUAGGAA	::::: : ::::::::.:::::	AUCCUUAUCCUCCGUAGUCCUU
chr6B:155332719-155333404(+)	595-616	2	zma-miR2118g/	22	UUGGAAUAGGAGGCAUUAGGAA	: ::::::::::::::.:::::	AUCCUUAUCCUCCGUAGUCCUU
chr6B:155463485-155464042(+)	469-490	4	zma-miR2118g/	22	UAGGAUUCAGAGGCAUUAGGAA	::::: : :::::::.:::::	AUCCUUAUCCUCCGUAGUCCUU
chr6B:30074516-30075414(-)	808-829	4	zma-miR2118g/	22	UGAGCAUGGGAGGCGUCAGGAA	:. : ::.::::::.:::::::	AUCCUUAUCCUCCGUAGUCCUU
chr6B:33476493-33477132(+)	551-572	3.5	zma-miR2118g/	22	UGGGAAUAUGAGGCAUCUGGAA	:.:::::: :::::::: ::::	AUCCUUAUCCUCCGUAGUCCUU
chr6B:41403945-41404817(-)	782-802	4	zma-miR2118g/	22	UAG-AAUAGGAGACAUCAGGAU	::: :::::::: ::::::::	AUCCUUAUCCUCCGUAGUCCUU
chr6B:42739126-42739686(-)	491-512	1.5	zma-miR2118g/	22	UGAGAAUAGGAGGCAUCAGGAA	:. :::::::::::::::::::	AUCCUUAUCCUCCGUAGUCCUU
chr6B:623338670-623339604(-)	824-845	3	zma-miR2118g/	22	UAGGGAUGAGAGGUAUCAGGAA	::::.::. ::::.::::::::	AUCCUUAUCCUCCGUAGUCCUU
chr6B:648044664-648045433(-)	679-700	4	zma-miR2118g/	22	UAGGAGUUGGAAGCAUCAGGAG	:::::.: ::: :::::::::.	AUCCUUAUCCUCCGUAGUCCUU
chr6B:665671050-665671670(-)	530-551	3	zma-miR2118g/	22	UAGGCAUAGAAGGCAUCAGGAA	:::: :::: ::::::::::::	AUCCUUAUCCUCCGUAGUCCUU
chr6D:17099504-17100103(-)	509-530	3.5	zma-miR2118g/	22	UAAGCAUGGGAGGUAUCAGGAA	:: : ::.:::::.::::::::	AUCCUUAUCCUCCGUAGUCCUU
chr6D:25488431-25489078(-)	512-532	4	zma-miR2118g/	22	UAG-AAUAGGAGACAUCAGGAU	::: :::::::: ::::::::	AUCCUUAUCCUCCGUAGUCCUU
chr6D:429804009-429804482(-)	364-385	4	zma-miR2118g/	22	UAGGACUAGGAAGCAUCAGGAU	::::: ::::: :::::::::	AUCCUUAUCCUCCGUAGUCCUU
chr6D:468992548-468993344(-)	706-727	3	zma-miR2118g/	22	UAGGCAUAGAAGGCAUCAGGAA	:::: :::: ::::::::::::	AUCCUUAUCCUCCGUAGUCCUU
chr6D:46909825-46910720(+)	805-826	1	zma-miR2118g/	22	UAGGAAUAGGAGGCAUCAGGAC	:::::::::::::::::::::	AUCCUUAUCCUCCGUAGUCCUU
chr6D:46929907-46930564(+)	576-597	2	zma-miR2118g/	22	UAGGAAUAGGAGCCAUCAGGAA	:::::::::::: :::::::::	AUCCUUAUCCUCCGUAGUCCUU
chr6D:55077096-55078094(-)	929-950	2	zma-miR2118g/	22	UAGGAAUAGGAGCCAUCAGGAA	:::::::::::: :::::::::	AUCCUUAUCCUCCGUAGUCCUU
chr6D:55110520-55111266(-)	637-658	4	zma-miR2118g/	22	UAGGAAUAAGAGCCAUCAGGAC	:::::::: ::: ::::::::	AUCCUUAUCCUCCGUAGUCCUU
chr6D:55313764-55314449(-)	595-616	2	zma-miR2118g/	22	UAGGAAUAGGAGACAUCAGGAA	:::::::::::: :::::::::	AUCCUUAUCCUCCGUAGUCCUU
chr6D:55318463-55319252(-)	720-741	4	zma-miR2118g/	22	UAGGAAUAAGAGCCAUCAGGAC	:::::::: ::: ::::::::	AUCCUUAUCCUCCGUAGUCCUU
chr6D:55612324-55613156(-)	742-763	2.5	zma-miR2118g/	22	UAGGAAUAGAAGGCAUCAGGAG	::::::::: :::::::::::.	AUCCUUAUCCUCCGUAGUCCUU
chr6D:77756900-77757678(-)	688-709	3.5	zma-miR2118g/	22	AGGGAAUAGGAGGCGUCGGGAA	.::::::::::::.::.::::	AUCCUUAUCCUCCGUAGUCCUU
chr6D:80605696-80606655(+)	826-847	3	zma-miR2118g/	22	UAGGAUUCAGAGGCAUCAGGAA	::::: : :::::::::::::	AUCCUUAUCCUCCGUAGUCCUU
chr6D:80630512-80631344(+)	763-784	3	zma-miR2118g/	22	UAGGAUUUGGAGGCAUUAGGAA	::::: : ::::::::.:::::	AUCCUUAUCCUCCGUAGUCCUU
chr6D:81110198-81110806(+)	518-539	3	zma-miR2118g/	22	UAGGAUUUGGAGGCAUUAGGAA	::::: : ::::::::.:::::	AUCCUUAUCCUCCGUAGUCCUU
chr6D:81120409-81121029(+)	530-551	4	zma-miR2118g/	22	UAGGAUUUGGAGGCAUUAGGGA	::::: : ::::::::.:::.:	AUCCUUAUCCUCCGUAGUCCUU
chr6D:81139830-81140545(+)	625-646	4	zma-miR2118g/	22	UUGGAAUUGGAGGCAUUGGGAA	: ::::: ::::::::..::::	AUCCUUAUCCUCCGUAGUCCUU
chr6D:81159479-81160059(+)	490-511	3	zma-miR2118g/	22	UUGGAAUUGGAGGUAUCAGGAA	: ::::: :::::.::::::::	AUCCUUAUCCUCCGUAGUCCUU
chr6D:81171653-81172506(+)	765-786	3	zma-miR2118g/	22	UUGGAAUUGGAGGCAUUAGGAA	: ::::: ::::::::.:::::	AUCCUUAUCCUCCGUAGUCCUU
chr6D:81212210-81212996(+)	698-719	3	zma-miR2118g/	22	UUGGAAUUGGAGGCAUUAGGAA	: ::::: ::::::::.:::::	AUCCUUAUCCUCCGUAGUCCUU
chr7A:105147515-105148018(-)	385-406	4	zma-miR2118g/	22	UAGGAAUAGGAUGCAUCAAGAA	::::::::::: :::::: :::	AUCCUUAUCCUCCGUAGUCCUU
chr7A:112940317-112940956(+)	551-572	1.5	zma-miR2118g/	22	UAGGAGUAGGAGGCAUCAGGGA	:::::.::::::::::::::.:	AUCCUUAUCCUCCGUAGUCCUU
chr7A:112955160-112956067(+)	817-838	1.5	zma-miR2118g/	22	UAGGAGUAGGAGGCAUUAGGAA	:::::.::::::::::.:::::	AUCCUUAUCCUCCGUAGUCCUU
chr7A:112964615-112965130(+)	467-488	1.5	zma-miR2118g/	22	UAGGAGUAGGAGGCAUCAGGGA	:::::.::::::::::::::.:	AUCCUUAUCCUCCGUAGUCCUU
chr7A:112971818-112972436(+)	509-530	3.5	zma-miR2118g/	22	UAGGAGUAGGAGGCAUAAGGGA	:::::.:::::::::: :::.:	AUCCUUAUCCUCCGUAGUCCUU
chr7A:12760946-12761778(+)	742-763	3.5	zma-miR2118g/	22	UGAGAAUAGGAGGCAUCUGGAA	:. :::::::::::::: ::::	AUCCUUAUCCUCCGUAGUCCUU
chr7A:13479999-13480787(+)	679-700	4	zma-miR2118g/	22	UACGAAUAGGAGACGUCAGGAA	:: ::::::::: :.:::::::	AUCCUUAUCCUCCGUAGUCCUU
chr7A:14464703-14465617(-)	826-847	3.5	zma-miR2118g/	22	AGGGAAUAGGGGGCGUCAGGAA	.::::::::.:::.:::::::	AUCCUUAUCCUCCGUAGUCCUU
chr7A:15125325-15126050(+)	616-637	3	zma-miR2118g/	22	UAUGAUUAGGAGGCAUCGGGAA	:: :: :::::::::::.::::	AUCCUUAUCCUCCGUAGUCCUU
chr7A:175903415-175904056(+)	530-551	4	zma-miR2118g/	22	UAGGGAUGAGAGGCAUCCGGAA	::::.::. :::::::: ::::	AUCCUUAUCCUCCGUAGUCCUU
chr7A:202832058-202832741(-)	593-614	4	zma-miR2118g/	22	UAGGAAUAGAAGGCAUCAGAAA	::::::::: ::::::::: ::	AUCCUUAUCCUCCGUAGUCCUU
chr7A:33761279-33761773(+)	385-406	3.5	zma-miR2118g/	22	UGGGAAUUGGAGGCAUCCGGAA	:.::::: ::::::::: ::::	AUCCUUAUCCUCCGUAGUCCUU
chr7A:33831356-33831894(+)	511-532	3.5	zma-miR2118g/	22	UGGGAAUUGGAGGCAUCCGGAA	:.::::: ::::::::: ::::	AUCCUUAUCCUCCGUAGUCCUU
chr7A:37999831-38000514(+)	614-635	4	zma-miR2118g/	22	UAGGAAUGAGAGACAUCAGGAG	:::::::. ::: ::::::::.	AUCCUUAUCCUCCGUAGUCCUU
chr7A:461898595-461899310(+)	625-646	4	zma-miR2118g/	22	UGGGGAUAAGAGGUGUCAGGAA	:.::.::: ::::..:::::::	AUCCUUAUCCUCCGUAGUCCUU
chr7A:461924862-461925411(+)	439-460	3.5	zma-miR2118g/	22	UGGGAAUACGAGGUGUCAGGAA	:.:::::: ::::..:::::::	AUCCUUAUCCUCCGUAGUCCUU
chr7A:506296658-506297238(-)	490-511	4	zma-miR2118g/	22	UAAGAAUAGGAGACAUCAGGAU	:: ::::::::: ::::::::	AUCCUUAUCCUCCGUAGUCCUU
chr7A:56098709-56099413(-)	616-637	4	zma-miR2118g/	22	UUGGCUUAGGAGGUAUCAGGAA	: :: :::::::.::::::::	AUCCUUAUCCUCCGUAGUCCUU
chr7A:581848950-581849631(+)	593-614	4	zma-miR2118g/	22	UAGGAAAAGGGGGCAUCUGGAA	:::::: :::.:::::: ::::	AUCCUUAUCCUCCGUAGUCCUU
chr7A:581946452-581947049(+)	509-530	3	zma-miR2118g/	22	UAGGAAAAGGAGGCAUCUGGAA	:::::: :::::::::: ::::	AUCCUUAUCCUCCGUAGUCCUU
chr7A:616991524-616992232(+)	620-641	4	zma-miR2118g/	22	UGAGAACGGGAGGCGUCAGGAA	:. ::: .::::::.:::::::	AUCCUUAUCCUCCGUAGUCCUU
chr7A:617114157-617114924(+)	679-700	4	zma-miR2118g/	22	UGGGAACGGGAGGCUUCAGGAA	:.:::: .:::::: :::::::	AUCCUUAUCCUCCGUAGUCCUU
chr7A:624822198-624822883(-)	616-637	3.5	zma-miR2118g/	22	UGGGAAUAGGAGGUAGCAGGAA	:.:::::::::::.: ::::::	AUCCUUAUCCUCCGUAGUCCUU
chr7A:624937221-624937757(-)	448-469	4	zma-miR2118g/	22	UGGGAGUAGGAGGUAGCAGGAA	:.:::.:::::::.: ::::::	AUCCUUAUCCUCCGUAGUCCUU
chr7A:651782544-651783249(-)	615-636	3	zma-miR2118g/	22	UUGGUGUGGGAGGCAUCAGGAA	: :: .:.::::::::::::::	AUCCUUAUCCUCCGUAGUCCUU
chr7A:664098973-664099865(-)	783-804	4	zma-miR2118g/	22	UAAGAAUAGGAUGCAUCGGGAA	:: :::::::: :::::.::::	AUCCUUAUCCUCCGUAGUCCUU
chr7A:690071516-690072349(-)	763-784	3.5	zma-miR2118g/	22	UAGAUAUGGGAGGCAUUAGGAA	::: ::.::::::::.:::::	AUCCUUAUCCUCCGUAGUCCUU
chr7B:11084210-11085082(+)	784-805	3	zma-miR2118g/	22	UGAGAGUAGGAGGCAUCGGGAA	:. ::.:::::::::::.::::	AUCCUUAUCCUCCGUAGUCCUU
chr7B:11293195-11293916(+)	652-673	3	zma-miR2118g/	22	UGAGAGUAGGAGGCAUCGGGAA	:. ::.:::::::::::.::::	AUCCUUAUCCUCCGUAGUCCUU
chr7B:138661193-138661750(+)	469-490	3	zma-miR2118g/	22	UAGGACUAGGAGGCAUCAAGAA	::::: :::::::::::: :::	AUCCUUAUCCUCCGUAGUCCUU
chr7B:138718140-138718760(+)	553-574	4	zma-miR2118g/	22	UAGGGCUGAGAGGCAUCGGGAA	::::. :. ::::::::.::::	AUCCUUAUCCUCCGUAGUCCUU
chr7B:412818210-412818893(+)	593-614	2.5	zma-miR2118g/	22	UGGGCAUAAGAGGCAUCAGGAA	:.:: ::: :::::::::::::	AUCCUUAUCCUCCGUAGUCCUU
chr7B:539786971-539787616(+)	536-557	3	zma-miR2118g/	22	UAGGAAAAGGAGGCAUCCGGAA	:::::: :::::::::: ::::	AUCCUUAUCCUCCGUAGUCCUU
chr7B:539859398-539860197(+)	709-730	3	zma-miR2118g/	22	UAGGAAAAGGAGGCAUCUGGAA	:::::: :::::::::: ::::	AUCCUUAUCCUCCGUAGUCCUU
chr7B:539863324-539864110(+)	698-719	3	zma-miR2118g/	22	UAGGAAAAGGAGGCAUCUGGAA	:::::: :::::::::: ::::	AUCCUUAUCCUCCGUAGUCCUU
chr7B:539917656-539918160(+)	395-416	4	zma-miR2118g/	22	CAGGAAAAGGAGGCAGCAGGAA	::::: :::::::: ::::::	AUCCUUAUCCUCCGUAGUCCUU
chr7B:579785568-579786149(+)	512-533	4	zma-miR2118g/	22	UAGAAAUAAGAGGCAUCGGGAC	::: :::: ::::::::.:::	AUCCUUAUCCUCCGUAGUCCUU
chr7B:58537182-58537718(-)	406-427	4	zma-miR2118g/	22	UAGGAAUAGGAUGCAUCAAGAA	::::::::::: :::::: :::	AUCCUUAUCCUCCGUAGUCCUU
chr7B:585629938-585630495(-)	488-509	4	zma-miR2118g/	22	UGGGAAUGGGAGGUAGCAGGAA	:.:::::.:::::.: ::::::	AUCCUUAUCCUCCGUAGUCCUU
chr7B:585779053-585779778(-)	637-658	4	zma-miR2118g/	22	UGGGAGUAGGAGGUAGCAGGAA	:.:::.:::::::.: ::::::	AUCCUUAUCCUCCGUAGUCCUU
chr7B:585845404-585845972(-)	499-520	4	zma-miR2118g/	22	UGGGAAUGGGAGGUAGCAGGAA	:.:::::.:::::.: ::::::	AUCCUUAUCCUCCGUAGUCCUU
chr7B:585983570-585984255(-)	595-616	4	zma-miR2118g/	22	UGGGAGUAGGAGGUAGCAGGAA	:.:::.:::::::.: ::::::	AUCCUUAUCCUCCGUAGUCCUU
chr7B:586232542-586233055(-)	425-446	4	zma-miR2118g/	22	UGGGAGUAGGAGGUAGCAGGAA	:.:::.:::::::.: ::::::	AUCCUUAUCCUCCGUAGUCCUU
chr7B:610096970-610097781(+)	721-742	3	zma-miR2118g/	22	UAGGAGUGGUAGGCAUCAGGAA	:::::.:.: ::::::::::::	AUCCUUAUCCUCCGUAGUCCUU
chr7B:611402145-611402765(-)	511-532	4	zma-miR2118g/	22	CAGGCAUGGGAGGUAUCAGGAG	::: ::.:::::.:::::::.	AUCCUUAUCCUCCGUAGUCCUU
chr7B:612321722-612322300(+)	509-530	3.5	zma-miR2118g/	22	UCGGCAUGAGAGGCAUCAGGAA	: :: ::. :::::::::::::	AUCCUUAUCCUCCGUAGUCCUU
chr7B:615680926-615681546(-)	530-551	4	zma-miR2118g/	22	UUGGAAUAGGAGGCACCAGGAU	: ::::::::::::: :::::	AUCCUUAUCCUCCGUAGUCCUU
chr7B:616493294-616493958(-)	574-595	4	zma-miR2118g/	22	UUGGUGUGGGAGGCAUCGGGAA	: :: .:.:::::::::.::::	AUCCUUAUCCUCCGUAGUCCUU
chr7B:633898655-633899429(-)	664-685	2	zma-miR2118g/	22	UAGGAAUAGGAUGCAUCAGGAA	::::::::::: ::::::::::	AUCCUUAUCCUCCGUAGUCCUU
chr7B:633926854-633927539(-)	595-616	3	zma-miR2118g/	22	UAGGAAUAGGGUGCAUCAGGAA	::::::::::. ::::::::::	AUCCUUAUCCUCCGUAGUCCUU
chr7B:634291714-634292661(-)	784-805	4	zma-miR2118g/	22	UAGGAAUAGGGUGCAUUAGGAA	::::::::::. ::::.:::::	AUCCUUAUCCUCCGUAGUCCUU
chr7B:65144398-65145186(+)	698-719	3	zma-miR2118g/	22	UAGGACUAGGAGGCAUCAGAAA	::::: ::::::::::::: ::	AUCCUUAUCCUCCGUAGUCCUU
chr7B:66306434-66306989(+)	467-488	1.5	zma-miR2118g/	22	UAGGAGUAGGAGGCAUCAGGGA	:::::.::::::::::::::.:	AUCCUUAUCCUCCGUAGUCCUU
chr7B:66413474-66414304(+)	761-782	4	zma-miR2118g/	22	UAGAACUAGGAGGCACCAGGAA	::: : ::::::::: ::::::	AUCCUUAUCCUCCGUAGUCCUU
chr7B:66502726-66503514(+)	700-721	3.5	zma-miR2118g/	22	UAGGACUGGGAGGCAUUGGGAA	::::: :.::::::::..::::	AUCCUUAUCCUCCGUAGUCCUU
chr7B:676036048-676036584(-)	467-488	4	zma-miR2118g/	22	UAGGUUUGGGAGGCAUUAGGAG	:::: :.::::::::.::::.	AUCCUUAUCCUCCGUAGUCCUU
chr7B:677662335-677663279(+)	854-875	3.5	zma-miR2118g/	22	UAGGCUUGGGAGGCAUUAGGAA	:::: :.::::::::.:::::	AUCCUUAUCCUCCGUAGUCCUU
chr7B:677923105-677923966(+)	771-792	3.5	zma-miR2118g/	22	UAGAUUUGGGAGGCAUCAGGAA	::: :.::::::::::::::	AUCCUUAUCCUCCGUAGUCCUU
chr7B:72160883-72161564(-)	593-614	3	zma-miR2118g/	22	UAGGCAUAGGAGGCACCAGGAA	:::: :::::::::: ::::::	AUCCUUAUCCUCCGUAGUCCUU
chr7D:101437229-101437765(-)	448-469	4	zma-miR2118g/	22	UAGGAAUAGGAUGCAUCAAGAA	::::::::::: :::::: :::	AUCCUUAUCCUCCGUAGUCCUU
chr7D:107331722-107332363(-)	574-595	1.5	zma-miR2118g/	22	UAGGAGUAGGAGGCAUCAGGGA	:::::.::::::::::::::.:	AUCCUUAUCCUCCGUAGUCCUU
chr7D:107366353-107367024(-)	583-604	1.5	zma-miR2118g/	22	UAGGAGUAGGAGGCAUCAGGGA	:::::.::::::::::::::.:	AUCCUUAUCCUCCGUAGUCCUU
chr7D:107583309-107583889(+)	490-511	3.5	zma-miR2118g/	22	UAGAAGUCGGAGGCAUCAGGGA	::: :.: ::::::::::::.:	AUCCUUAUCCUCCGUAGUCCUU
chr7D:107656955-107657733(+)	669-690	1.5	zma-miR2118g/	22	UAGGAGUAGGAGGCAUCAGGGA	:::::.::::::::::::::.:	AUCCUUAUCCUCCGUAGUCCUU
chr7D:108622813-108623330(+)	427-448	3.5	zma-miR2118g/	22	UAGGAUUGGGAGGUAUUAGGAA	::::: :.:::::.::.:::::	AUCCUUAUCCUCCGUAGUCCUU
chr7D:111218737-111219819(+)	994-1015	3	zma-miR2118g/	22	UAAGAAUAGGAGACAUCAGGAA	:: ::::::::: :::::::::	AUCCUUAUCCUCCGUAGUCCUU
chr7D:121787296-121788000(+)	595-616	3.5	zma-miR2118g/	22	UAUGAAUGGGAAGCAUCAGGAA	:: ::::.::: ::::::::::	AUCCUUAUCCUCCGUAGUCCUU
chr7D:13408639-13409194(+)	446-467	3.5	zma-miR2118g/	22	UGAGAAUAGGAGACAUCAGGAA	:. ::::::::: :::::::::	AUCCUUAUCCUCCGUAGUCCUU
chr7D:14104720-14105375(-)	538-559	3.5	zma-miR2118g/	22	UGGGAAUAGGAGACAUCGGGAA	:.:::::::::: ::::.::::	AUCCUUAUCCUCCGUAGUCCUU
chr7D:14629038-14629870(+)	763-784	4	zma-miR2118g/	22	UAGAACUAGGAGGCAUAAGGAA	::: : :::::::::: :::::	AUCCUUAUCCUCCGUAGUCCUU
chr7D:15023509-15024087(-)	490-511	4	zma-miR2118g/	22	GGGGAGUAGGAGGCAUCGGGAC	.:::.:::::::::::.:::	AUCCUUAUCCUCCGUAGUCCUU
chr7D:15161794-15162434(-)	551-572	3.5	zma-miR2118g/	22	AGGGAAUAGAAGGCAUCAGGAA	.::::::: ::::::::::::	AUCCUUAUCCUCCGUAGUCCUU
chr7D:15493998-15494683(-)	595-616	3.5	zma-miR2118g/	22	CAGGGUUAGGAGGUAUCAGGAA	:::. :::::::.::::::::	AUCCUUAUCCUCCGUAGUCCUU
chr7D:173809235-173809813(+)	490-511	2	zma-miR2118g/	22	UAGGACUAGGAGGCGUCAGGAA	::::: ::::::::.:::::::	AUCCUUAUCCUCCGUAGUCCUU
chr7D:173919881-173920503(+)	553-574	4	zma-miR2118g/	22	UAGGGCUGAGAGGCAUCGGGAA	::::. :. ::::::::.::::	AUCCUUAUCCUCCGUAGUCCUU
chr7D:30481757-30482459(+)	614-635	4	zma-miR2118g/	22	UAGGACUAGGAGGCAUAGGGAA	::::: :::::::::: .::::	AUCCUUAUCCUCCGUAGUCCUU
chr7D:35547696-35548213(-)	448-469	2.5	zma-miR2118g/	22	AGGGAAUGGGAGGCAUCAGGAG	.:::::.:::::::::::::.	AUCCUUAUCCUCCGUAGUCCUU
chr7D:38631536-38632114(+)	490-511	4	zma-miR2118g/	22	UGGGAAUACGAGACAUCAGGAG	:.:::::: ::: ::::::::.	AUCCUUAUCCUCCGUAGUCCUU
chr7D:39256490-39257052(-)	472-493	4	zma-miR2118g/	22	UAGGACUAGGAAGCAUCAGGAU	::::: ::::: :::::::::	AUCCUUAUCCUCCGUAGUCCUU
chr7D:39498921-39499563(-)	551-572	4	zma-miR2118g/	22	UAGGACUAGGAAGCAUCAGGAU	::::: ::::: :::::::::	AUCCUUAUCCUCCGUAGUCCUU
chr7D:39500268-39500847(-)	470-491	4	zma-miR2118g/	22	UAGGACUAGGAAGCAUCAGGAU	::::: ::::: :::::::::	AUCCUUAUCCUCCGUAGUCCUU
chr7D:39504442-39504907(-)	376-397	4	zma-miR2118g/	22	UAGGACUAGGAAGCAUCAGGAU	::::: ::::: :::::::::	AUCCUUAUCCUCCGUAGUCCUU
chr7D:39958372-39959140(+)	680-701	4	zma-miR2118g/	22	UAAGAAUAGGAGGCAUCGGGCA	:: ::::::::::::::.:: :	AUCCUUAUCCUCCGUAGUCCUU
chr7D:41433994-41434845(-)	763-784	4	zma-miR2118g/	22	GAGGAAUACGAGGCAGCAGGAA	::::::: :::::: ::::::	AUCCUUAUCCUCCGUAGUCCUU
chr7D:426774409-426775136(+)	637-658	3.5	zma-miR2118g/	22	UAGGAAAGAGAGGCAUCAGGAU	:::::: . ::::::::::::	AUCCUUAUCCUCCGUAGUCCUU
chr7D:426778651-426779252(+)	512-532	3	zma-miR2118g/	22	UAAGAAUAGGAGGCAUC-GGAA	:: :::::::::::::: ::::	AUCCUUAUCCUCCGUAGUCCUU
chr7D:44300542-44301015(+)	385-406	3.5	zma-miR2118g/	22	UUGGAAUGGGAGGAAUCAGGAA	: :::::.::::: ::::::::	AUCCUUAUCCUCCGUAGUCCUU
chr7D:510884032-510884794(+)	674-695	3	zma-miR2118g/	22	UAGGAAAAGGAGGCAUCUGGAA	:::::: :::::::::: ::::	AUCCUUAUCCUCCGUAGUCCUU
chr7D:511330113-511330693(-)	469-490	3	zma-miR2118g/	22	UAGGAACAGGAGGCAUCAGUAA	:::::: :::::::::::: ::	AUCCUUAUCCUCCGUAGUCCUU
chr7D:511338020-511338638(-)	528-549	4	zma-miR2118g/	22	UAGGAAUAGGAGUCACCAGGAA	:::::::::::: :: ::::::	AUCCUUAUCCUCCGUAGUCCUU
chr7D:536307248-536308130(-)	722-743	4	zma-miR2118g/	22	UGGGAACGGGAGGCUUCAGGAA	:.:::: .:::::: :::::::	AUCCUUAUCCUCCGUAGUCCUU
chr7D:541967814-541968520(-)	616-637	3.5	zma-miR2118g/	22	UGGGAAUAGGAGGUAGCAGGAA	:.:::::::::::.: ::::::	AUCCUUAUCCUCCGUAGUCCUU
chr7D:541972361-541973088(-)	677-698	4	zma-miR2118g/	22	UGGGAGUAGGAGGUAGCAGGAA	:.:::.:::::::.: ::::::	AUCCUUAUCCUCCGUAGUCCUU
chr7D:542238834-542239563(-)	639-660	4	zma-miR2118g/	22	UGGGAGUAGGAGGUAGCAGGAA	:.:::.:::::::.: ::::::	AUCCUUAUCCUCCGUAGUCCUU
chr7D:542882930-542883487(-)	467-488	4	zma-miR2118g/	22	UGGGAGUAGGAGGUAGCAGGAA	:.:::.:::::::.: ::::::	AUCCUUAUCCUCCGUAGUCCUU
chr7D:563703065-563704082(-)	929-950	4	zma-miR2118g/	22	UAGGUUUAGGAGGUAUCAGGGA	:::: :::::::.::::::.:	AUCCUUAUCCUCCGUAGUCCUU
chr7D:563731036-563731741(-)	617-638	4	zma-miR2118g/	22	UAGGUUUAGGAGGUAUCAGGGA	:::: :::::::.::::::.:	AUCCUUAUCCUCCGUAGUCCUU
chr7D:564623917-564624644(+)	658-679	4	zma-miR2118g/	22	UAGGCUUAGGAGGCAUCGGGAC	:::: :::::::::::.:::	AUCCUUAUCCUCCGUAGUCCUU
chr7D:565283322-565283923(-)	511-532	4	zma-miR2118g/	22	UAGGAAUAGGAAGCACCAGGAA	::::::::::: ::: ::::::	AUCCUUAUCCUCCGUAGUCCUU
chr7D:597122520-597123144(-)	532-553	3.5	zma-miR2118g/	22	UAGAUAUGGGAGGCAUUAGGAA	::: ::.::::::::.:::::	AUCCUUAUCCUCCGUAGUCCUU
chr7D:597178416-597179122(-)	616-637	3.5	zma-miR2118g/	22	UAGAUAUGGGAGGCAUUAGGAA	::: ::.::::::::.:::::	AUCCUUAUCCUCCGUAGUCCUU
chrUn:132115110-132115709(-)	490-511	3	zma-miR2118g/	22	UGGGAGUAGGAGGCAUCCGGAA	:.:::.::::::::::: ::::	AUCCUUAUCCUCCGUAGUCCUU
chrUn:232345708-232346349(+)	532-553	4	zma-miR2118g/	22	UAGGAGUAGGAGGCAUCGGUAG	:::::.:::::::::::.: :.	AUCCUUAUCCUCCGUAGUCCUU
chrUn:242487110-242487837(+)	679-700	4	zma-miR2118g/	22	UGGGAAUAGGAGACAUCGGGAG	:.:::::::::: ::::.:::.	AUCCUUAUCCUCCGUAGUCCUU
chrUn:268664366-268665196(+)	763-784	3.5	zma-miR2118g/	22	AGGGAAUAGAAGGCAUCAGGAA	.::::::: ::::::::::::	AUCCUUAUCCUCCGUAGUCCUU
chrUn:31921860-31922315(+)	364-385	3.5	zma-miR2118g/	22	UAGGAGUUGGAGGCUUCAGGAA	:::::.: :::::: :::::::	AUCCUUAUCCUCCGUAGUCCUU
chrUn:70302405-70302942(+)	470-491	4	zma-miR2118g/	22	UAUGCAUAGGAGGCACCAGGAA	:: : :::::::::: ::::::	AUCCUUAUCCUCCGUAGUCCUU
chrUn:82082098-82082699(+)	511-532	2	zma-miR2118g/	22	UAGGAUUAGGAGGCAUCGGGAA	::::: :::::::::::.::::	AUCCUUAUCCUCCGUAGUCCUU
chrUn:82205990-82206611(+)	575-596	4	zma-miR2118g/	22	UGGGAAUAGGAGACAUCGGGAG	:.:::::::::: ::::.:::.	AUCCUUAUCCUCCGUAGUCCUU
chrUn:92626982-92627639(-)	546-567	4	zma-miR2118g/	22	UAGGAAUAGGAUGCAGCAGGAA	::::::::::: ::: ::::::	AUCCUUAUCCUCCGUAGUCCUU
chrUn:92630791-92631455(-)	553-574	2	zma-miR2118g/	22	UAGGAAUAGGAUGCAUCAGGAA	::::::::::: ::::::::::	AUCCUUAUCCUCCGUAGUCCUU
chrUn:93716568-93717440(+)	763-784	4	zma-miR2118g/	22	UGAGAAUAGGAGACAUCAGGAG	:. ::::::::: ::::::::.	AUCCUUAUCCUCCGUAGUCCUU
chrUn:93729427-93730026(+)	553-574	4	zma-miR2118g/	22	UGGGAGUAGGAGGCGUCAGAAA	:.:::.::::::::.:::: ::	AUCCUUAUCCUCCGUAGUCCUU
chrUn:93788424-93789045(-)	552-573	1.5	zma-miR2118g/	22	UGAGAAUAGGAGGCAUCAGGAA	:. :::::::::::::::::::	AUCCUUAUCCUCCGUAGUCCUU
chr4A:651124519-651124950(-)	343-365	3	osa-miR2118c/osa-miR2118q/	22	UAUGGAAUAAGAGGCAUUGGGAA	:: :::::: :::::::.:::::	AU-CCUUAUCCUCCGUAGCCCUU
chr4A:651129508-651130172(-)	574-596	3	osa-miR2118c/osa-miR2118q/	22	UAUGGAAUAGGAGGCAUAGGGAA	:: :::::::::::::: :::::	AU-CCUUAUCCUCCGUAGCCCUU
chr5B:13465051-13465650(-)	490-512	3	osa-miR2118c/osa-miR2118q/	22	UAUGGAAUAGGAGGCACCGGGAA	:: ::::::::::::: ::::::	AU-CCUUAUCCUCCGUAGCCCUU
chr7A:42812698-42813400(+)	635-657	2	osa-miR2118c/osa-miR2118q/	22	UAUGGAAUAAGAGGCAUCGGGAA	:: :::::: :::::::::::::	AU-CCUUAUCCUCCGUAGCCCUU
chr7A:79591123-79591573(+)	362-384	3	osa-miR2118c/osa-miR2118q/	22	UACGGAACAAGAGGCAUCGGGAA	:: :::: : :::::::::::::	AU-CCUUAUCCUCCGUAGCCCUU
chr5D:448016921-448017688(+)	679-701	4	osa-miR2118c/osa-miR2118q/	22	UUGGGAUGGUGAGGCAUUGGGAA	: ::.::.: :::::::.:::::	AUCCUUAUC-CUCCGUAGCCCUU
chr2B:2936857-2937519(+)	592-614	3.5	osa-miR2118c/osa-miR2118q/	22	UAGGAAUGGGAGGCACUUGGGAA	:::::::.::::::: :.:::::	AUCCUUAUCCUCCGU-AGCCCUU
chr3A:691248700-691249238(-)	447-469	4	osa-miR2118c/osa-miR2118q/	22	UUGGAAUAGUAGGCAUACGGGAA	: ::::::: :::::: ::::::	AUCCUUAUCCUCCGUA-GCCCUU
chr3B:736934412-736935048(-)	487-509	4	osa-miR2118c/osa-miR2118q/	22	UUGGAAUAGUAGGCAUACGGGAA	: ::::::: :::::: ::::::	AUCCUUAUCCUCCGUA-GCCCUU
chr3B:758457686-758458138(-)	361-383	4	osa-miR2118c/osa-miR2118q/	22	UUGGACUAGGAGGCAUCAGGGAA	: ::: ::::::::::: :::::	AUCCUUAUCCUCCGUAG-CCCUU
chr5D:439643834-439644407(+)	414-436	3.5	osa-miR2118c/osa-miR2118q/	22	UAGGAGUAAGAGGCAUCUGGGAA	:::::.:: :::::::: :::::	AUCCUUAUCCUCCGUAG-CCCUU
chr5D:500942643-500943471(-)	718-740	4	osa-miR2118c/osa-miR2118q/	22	UAAGAAUAGGAGGCGUCCGGGAA	:: :::::::::::.:: :::::	AUCCUUAUCCUCCGUAG-CCCUU
chr4A:666123797-666124557(+)	671-693	4	osa-miR2118c/osa-miR2118q/	22	UAGGGAUGAGAGGCAUCGAGGAA	::::.::. ::::::::: ::::	AUCCUUAUCCUCCGUAGC-CCUU
chr1A:535056161-535056992(+)	761-783	4	osa-miR2118c/osa-miR2118q/	22	UAGGUGUGGGAGGCAUCGGUGAA	:::: .:.::::::::::: :::	AUCCUUAUCCUCCGUAGCC-CUU
chr7A:112355642-112356302(+)	571-593	2.5	osa-miR2118c/osa-miR2118q/	22	UAGGAAUGGGAGGCAUCGGAGAA	:::::::.::::::::::: :::	AUCCUUAUCCUCCGUAGCC-CUU
chr7A:112442986-112443530(+)	477-499	3.5	osa-miR2118c/osa-miR2118q/	22	UAGGCAUGGGAGGCAUCGGAGAA	:::: ::.::::::::::: :::	AUCCUUAUCCUCCGUAGCC-CUU
chr7D:106625889-106626641(-)	612-634	3.5	osa-miR2118c/osa-miR2118q/	22	UAGAAAUGGGAGGCAUCGGAGAA	::: :::.::::::::::: :::	AUCCUUAUCCUCCGUAGCC-CUU
chr7D:107069927-107070484(+)	466-488	4	osa-miR2118c/osa-miR2118q/	22	UAGGCAUUGGAGGCAUCGGAGAA	:::: :: ::::::::::: :::	AUCCUUAUCCUCCGUAGCC-CUU
chr7D:107327753-107328581(+)	718-740	3.5	osa-miR2118c/osa-miR2118q/	22	UAGGCAUGGGAGGCAUCGGAGAA	:::: ::.::::::::::: :::	AUCCUUAUCCUCCGUAGCC-CUU
chr1A:347632974-347633656(-)	573-594	4	osa-miR2118c/osa-miR2118q/	22	UAGGGAUGAGGGGCGUCGGGAA	::::.::. :.:::.:::::::	AUCCUUAUCCUCCGUAGCCCUU
chr1A:438663431-438664334(+)	794-815	3.5	osa-miR2118c/osa-miR2118q/	22	UGGGCAUCAGAGGCAUCGGGAA	:.:: :: :::::::::::::	AUCCUUAUCCUCCGUAGCCCUU
chr1A:513463093-513463880(+)	678-699	4	osa-miR2118c/osa-miR2118q/	22	UCGAAAUAGAAGGCAUCGGGAA	: : ::::: ::::::::::::	AUCCUUAUCCUCCGUAGCCCUU
chr1A:514555179-514555830(-)	555-576	3.5	osa-miR2118c/osa-miR2118q/	22	UGGGAAUAGGAGGCAUUGGAAA	:.::::::::::::::.:: ::	AUCCUUAUCCUCCGUAGCCCUU
chr1A:514634539-514635214(-)	489-510	3.5	osa-miR2118c/osa-miR2118q/	22	UGGGCAUAGGAGGCAUCGGAAA	:.:: :::::::::::::: ::	AUCCUUAUCCUCCGUAGCCCUU
chr1A:520433240-520433763(-)	433-454	4	osa-miR2118c/osa-miR2118q/	22	UAGGCAUAUGAGGCAUCAGGAA	:::: ::: :::::::: ::::	AUCCUUAUCCUCCGUAGCCCUU
chr1A:543504345-543504883(-)	469-490	3.5	osa-miR2118c/osa-miR2118q/	22	UAGGGUUUAGAGGCAUCGGGAA	::::. : :::::::::::::	AUCCUUAUCCUCCGUAGCCCUU
chr1B:374320210-374320887(-)	587-608	4	osa-miR2118c/osa-miR2118q/	22	UAGGGAUGGGCGGCAUUGGGAA	::::.::.:: :::::.:::::	AUCCUUAUCCUCCGUAGCCCUU
chr1B:550744180-550744945(-)	656-677	4	osa-miR2118c/osa-miR2118q/	22	UGGGAAUGAGAGGCAUCGGAAA	:.:::::. :::::::::: ::	AUCCUUAUCCUCCGUAGCCCUU
chr1B:562166211-562166854(+)	553-574	3.5	osa-miR2118c/osa-miR2118q/	22	UCGAAGUAGGAGGCAUUGGGAA	: : :.::::::::::.:::::	AUCCUUAUCCUCCGUAGCCCUU
chr1B:562357311-562358217(+)	807-828	4	osa-miR2118c/osa-miR2118q/	22	UGGGAAUGGGAUGCAUUGGGAA	:.:::::.::: ::::.:::::	AUCCUUAUCCUCCGUAGCCCUU
chr1B:564291121-564291956(-)	726-747	4	osa-miR2118c/osa-miR2118q/	22	UGGGAGUAGGAGGCAUUGGAAA	:.:::.::::::::::.:: ::	AUCCUUAUCCUCCGUAGCCCUU
chr1B:564859901-564860572(-)	581-602	3.5	osa-miR2118c/osa-miR2118q/	22	UGGGCAUAGGAGGCAUCGGAAA	:.:: :::::::::::::: ::	AUCCUUAUCCUCCGUAGCCCUU
chr1B:564890616-564891520(-)	814-835	3.5	osa-miR2118c/osa-miR2118q/	22	UGGGCAUAGGAAGCAUCGGGAA	:.:: :::::: ::::::::::	AUCCUUAUCCUCCGUAGCCCUU
chr1B:592210676-592211443(-)	677-698	4	osa-miR2118c/osa-miR2118q/	22	UCGGGAUGAGAGGCAUUGGGAA	: ::.::. :::::::.:::::	AUCCUUAUCCUCCGUAGCCCUU
chr1B:640481384-640481899(-)	425-446	4	osa-miR2118c/osa-miR2118q/	22	UAGGCAUAGGGGGCAUCAGGAA	:::: :::::.:::::: ::::	AUCCUUAUCCUCCGUAGCCCUU
chr1B:666289829-666290555(-)	638-659	3.5	osa-miR2118c/osa-miR2118q/	22	UAGGUAUGGGAGGCAUAGGGAA	:::: ::.:::::::: :::::	AUCCUUAUCCUCCGUAGCCCUU
chr1D:393480195-393480859(+)	616-637	4	osa-miR2118c/osa-miR2118q/	22	UAGGCAUAAGAGGCACCGGGAA	:::: ::: :::::: ::::::	AUCCUUAUCCUCCGUAGCCCUU
chr1D:396879642-396880242(-)	511-532	3.5	osa-miR2118c/osa-miR2118q/	22	UUGGAAUGGGAGGCAUCGGAAA	: :::::.::::::::::: ::	AUCCUUAUCCUCCGUAGCCCUU
chr1D:415460575-415461218(+)	553-574	4	osa-miR2118c/osa-miR2118q/	22	UCGAAAUAGGAGGCAUCAGGAA	: : ::::::::::::: ::::	AUCCUUAUCCUCCGUAGCCCUU
chr1D:415617014-415617760(+)	637-658	4	osa-miR2118c/osa-miR2118q/	22	UCGAAAUAGAAGGCAUCGGGAA	: : ::::: ::::::::::::	AUCCUUAUCCUCCGUAGCCCUU
chr1D:415620955-415621449(+)	385-406	4	osa-miR2118c/osa-miR2118q/	22	UCGAAAUAGGUGGCAUCGGGAA	: : :::::: :::::::::::	AUCCUUAUCCUCCGUAGCCCUU
chr1D:415668507-415669116(+)	509-530	4	osa-miR2118c/osa-miR2118q/	22	UCGAAAUAGGAGGCAUCGGAAA	: : ::::::::::::::: ::	AUCCUUAUCCUCCGUAGCCCUU
chr1D:415703970-415704665(+)	595-616	4	osa-miR2118c/osa-miR2118q/	22	UGGGAAUGGGAUGCAUUGGGAA	:.:::::.::: ::::.:::::	AUCCUUAUCCUCCGUAGCCCUU
chr1D:416875376-416876042(-)	557-578	2.5	osa-miR2118c/osa-miR2118q/	22	UAGGGAUAGGAUGCAUCGGGAA	::::.:::::: ::::::::::	AUCCUUAUCCUCCGUAGCCCUU
chr1D:417624094-417624841(-)	657-678	4	osa-miR2118c/osa-miR2118q/	22	UGGGAGUAGGAGGCAUUGGAAA	:.:::.::::::::::.:: ::	AUCCUUAUCCUCCGUAGCCCUU
chr1D:417768947-417769565(-)	524-545	4	osa-miR2118c/osa-miR2118q/	22	UGGGAGUAGGAGGCAUUGGAAA	:.:::.::::::::::.:: ::	AUCCUUAUCCUCCGUAGCCCUU
chr1D:417984693-417985216(-)	433-454	3.5	osa-miR2118c/osa-miR2118q/	22	UGGGCAUAGGAGGCAUCGGAAA	:.:: :::::::::::::: ::	AUCCUUAUCCUCCGUAGCCCUU
chr1D:424596718-424597380(-)	572-593	4	osa-miR2118c/osa-miR2118q/	22	UAGGCAUAUGAGGCAUCAGGAA	:::: ::: :::::::: ::::	AUCCUUAUCCUCCGUAGCCCUU
chr1D:424629683-424630198(-)	425-446	4	osa-miR2118c/osa-miR2118q/	22	UAGGCAUAUGAGGCAUCAGGAA	:::: ::: :::::::: ::::	AUCCUUAUCCUCCGUAGCCCUU
chr1D:436979083-436979871(-)	656-677	3.5	osa-miR2118c/osa-miR2118q/	22	UAGGAAUGGGCGGCAUUGGGAA	:::::::.:: :::::.:::::	AUCCUUAUCCUCCGUAGCCCUU
chr1D:438937422-438938062(+)	550-571	4	osa-miR2118c/osa-miR2118q/	22	UAGGUGUGGGAGGCAUCGGUAA	:::: .:.::::::::::: ::	AUCCUUAUCCUCCGUAGCCCUU
chr2A:21596016-21596804(-)	700-721	4	osa-miR2118c/osa-miR2118q/	22	UAGGAUUAGGAGUCAUCGGGAU	::::: :::::: ::::::::	AUCCUUAUCCUCCGUAGCCCUU
chr2A:21762259-21762797(-)	448-469	4	osa-miR2118c/osa-miR2118q/	22	UAGGACUAGGAGACAUUGGGAA	::::: :::::: :::.:::::	AUCCUUAUCCUCCGUAGCCCUU
chr2A:712800313-712801080(+)	658-679	3.5	osa-miR2118c/osa-miR2118q/	22	UAAGAGUAGGAGACAUCGGGAA	:: ::.:::::: :::::::::	AUCCUUAUCCUCCGUAGCCCUU
chr2A:733130133-733131082(-)	840-861	3.5	osa-miR2118c/osa-miR2118q/	22	UAGGAAUGGGAGGUGUCGGGAU	:::::::.:::::..::::::	AUCCUUAUCCUCCGUAGCCCUU
chr2B:2688568-2689125(+)	469-490	3	osa-miR2118c/osa-miR2118q/	22	UAGGAAUAAGAGGUAUCGGGGA	:::::::: ::::.::::::.:	AUCCUUAUCCUCCGUAGCCCUU
chr2B:690599585-690600186(+)	532-553	1.5	osa-miR2118c/osa-miR2118q/	22	UAAGAGUAGGAGGCAUCGGGAA	:: ::.::::::::::::::::	AUCCUUAUCCUCCGUAGCCCUU
chr2B:690674889-690675593(+)	635-656	4	osa-miR2118c/osa-miR2118q/	22	UAAGAAUAGGAGACAUUGGGAA	:: ::::::::: :::.:::::	AUCCUUAUCCUCCGUAGCCCUU
chr2D:20673791-20674674(-)	795-816	2	osa-miR2118c/osa-miR2118q/	22	UGGGGUUAGGAGGCAUCGGGAA	:.::. ::::::::::::::::	AUCCUUAUCCUCCGUAGCCCUU
chr2D:20847800-20848569(-)	679-700	4	osa-miR2118c/osa-miR2118q/	22	UAGGACUAGGAGACAUUGGGAA	::::: :::::: :::.:::::	AUCCUUAUCCUCCGUAGCCCUU
chr2D:20869765-20870448(-)	595-616	4	osa-miR2118c/osa-miR2118q/	22	UAGAAUUAGGAGGCGUUGGGAA	::: : ::::::::.:.:::::	AUCCUUAUCCUCCGUAGCCCUU
chr2D:351389781-351390401(-)	530-551	2	osa-miR2118c/osa-miR2118q/	22	UAGGAAUAGGUGGCAUCGGGAA	:::::::::: :::::::::::	AUCCUUAUCCUCCGUAGCCCUU
chr2D:43425799-43426400(-)	532-553	3.5	osa-miR2118c/osa-miR2118q/	22	UAGGUUUGGGAGGCAUUGGGAA	:::: :.::::::::.:::::	AUCCUUAUCCUCCGUAGCCCUU
chr2D:593735806-593736635(+)	531-552	3.5	osa-miR2118c/osa-miR2118q/	22	UGGGAAGAGGAGGCACCGGGAA	:.:::: :::::::: ::::::	AUCCUUAUCCUCCGUAGCCCUU
chr3A:1114475-1115198(-)	614-635	3.5	osa-miR2118c/osa-miR2118q/	22	UGGGAAUAGGAGGCGUCGGUAA	:.::::::::::::.:::: ::	AUCCUUAUCCUCCGUAGCCCUU
chr3A:27422033-27422698(+)	575-596	4	osa-miR2118c/osa-miR2118q/	22	UAGAAAUAAGAGGCAUAGGGAA	::: :::: ::::::: :::::	AUCCUUAUCCUCCGUAGCCCUU
chr3A:28406943-28407650(-)	617-638	4	osa-miR2118c/osa-miR2118q/	22	UAGGAAUCGGAGGCGCCGGGAA	::::::: ::::::. ::::::	AUCCUUAUCCUCCGUAGCCCUU
chr3A:28456004-28456788(+)	675-696	2	osa-miR2118c/osa-miR2118q/	22	UAGGAGUGAGAGGCAUCGGGAA	:::::.:. :::::::::::::	AUCCUUAUCCUCCGUAGCCCUU
chr3A:28572078-28572845(-)	658-679	4	osa-miR2118c/osa-miR2118q/	22	UAAGAGUAGGAGGCAUCGGUAG	:: ::.::::::::::::: :.	AUCCUUAUCCUCCGUAGCCCUU
chr3A:29151511-29152152(+)	532-553	3	osa-miR2118c/osa-miR2118q/	22	UAGGAGUAGGAGGCAUCGGUAG	:::::.::::::::::::: :.	AUCCUUAUCCUCCGUAGCCCUU
chr3A:30540367-30540964(-)	488-509	3.5	osa-miR2118c/osa-miR2118q/	22	UGGGGGUAGGAGGCACCGGGAA	:.::..::::::::: ::::::	AUCCUUAUCCUCCGUAGCCCUU
chr3A:32856529-32857294(-)	656-677	4	osa-miR2118c/osa-miR2118q/	22	UUGGAAAAGGAGACAUCGGGAA	: :::: ::::: :::::::::	AUCCUUAUCCUCCGUAGCCCUU
chr3A:33989801-33990631(+)	740-761	3	osa-miR2118c/osa-miR2118q/	22	UAGGAAAAGGAGGCACCGGGAA	:::::: :::::::: ::::::	AUCCUUAUCCUCCGUAGCCCUU
chr3A:579340517-579341222(-)	615-636	4	osa-miR2118c/osa-miR2118q/	22	AGGGAAUGGGAUGCAUCGGGAA	.:::::.::: ::::::::::	AUCCUUAUCCUCCGUAGCCCUU
chr3A:646288437-646288961(+)	427-448	2	osa-miR2118c/osa-miR2118q/	22	UAGGAAUAGGAGGCAUUGGGGA	::::::::::::::::.:::.:	AUCCUUAUCCUCCGUAGCCCUU
chr3A:646294818-646295438(+)	532-553	4	osa-miR2118c/osa-miR2118q/	22	UAGGAAUAGGUGGCAUUGGGGA	:::::::::: :::::.:::.:	AUCCUUAUCCUCCGUAGCCCUU
chr3A:646460385-646461033(+)	560-581	4	osa-miR2118c/osa-miR2118q/	22	UAGGAAUAGGAAGCAUUGGGGA	::::::::::: ::::.:::.:	AUCCUUAUCCUCCGUAGCCCUU
chr3A:646501533-646501901(+)	280-301	4	osa-miR2118c/osa-miR2118q/	22	UAGGAAUAGGAAGCAUUGGGGA	::::::::::: ::::.:::.:	AUCCUUAUCCUCCGUAGCCCUU
chr3A:646526387-646526987(+)	491-512	4	osa-miR2118c/osa-miR2118q/	22	UAGGAAUAGGAAGCAUUGGGGA	::::::::::: ::::.:::.:	AUCCUUAUCCUCCGUAGCCCUU
chr3A:646556529-646557212(+)	614-635	4	osa-miR2118c/osa-miR2118q/	22	UAGGAAUAGGAAGCAUUGGGGA	::::::::::: ::::.:::.:	AUCCUUAUCCUCCGUAGCCCUU
chr3A:704369031-704369600(-)	469-490	4	osa-miR2118c/osa-miR2118q/	22	UUGGUAUAGAAGGCAUCGGGAA	: :: :::: ::::::::::::	AUCCUUAUCCUCCGUAGCCCUU
chr3A:705275864-705276671(+)	698-719	3	osa-miR2118c/osa-miR2118q/	22	UGGGAGUAGGAGGCAUCCGGAA	:.:::.::::::::::: ::::	AUCCUUAUCCUCCGUAGCCCUU
chr3A:706646156-706646816(+)	572-593	3.5	osa-miR2118c/osa-miR2118q/	22	UAUGAAUGGGAGGCAUCUGGAA	:: ::::.::::::::: ::::	AUCCUUAUCCUCCGUAGCCCUU
chr3A:80695902-80696478(+)	467-488	4	osa-miR2118c/osa-miR2118q/	22	UAGGCCUAGGAGGUAUUGGGAA	:::: :::::::.::.:::::	AUCCUUAUCCUCCGUAGCCCUU
chr3B:115506007-115507035(+)	919-940	4	osa-miR2118c/osa-miR2118q/	22	UAGGCCUAGGAGGUAUUGGGAA	:::: :::::::.::.:::::	AUCCUUAUCCUCCGUAGCCCUU
chr3B:31670352-31671014(+)	574-595	4	osa-miR2118c/osa-miR2118q/	22	UAGAAAUAAGAGGCAUAGGGAA	::: :::: ::::::: :::::	AUCCUUAUCCUCCGUAGCCCUU
chr3B:32471024-32471696(-)	563-584	3.5	osa-miR2118c/osa-miR2118q/	22	UAGGAGUUGGAGGCAUCGGAAA	:::::.: ::::::::::: ::	AUCCUUAUCCUCCGUAGCCCUU
chr3B:33952259-33952755(-)	406-427	4	osa-miR2118c/osa-miR2118q/	22	UGAGAGUAGGAGGUAUUGGGAA	:. ::.:::::::.::.:::::	AUCCUUAUCCUCCGUAGCCCUU
chr3B:33969598-33970281(-)	574-595	0.5	osa-miR2118c/osa-miR2118q/	22	UAGGAGUAGGAGGCAUCGGGAA	:::::.::::::::::::::::	AUCCUUAUCCUCCGUAGCCCUU
chr3B:34115749-34116236(-)	258-279	3	osa-miR2118c/osa-miR2118q/	22	UAGGAGUAGGAGGCAUCGGUAG	:::::.::::::::::::: :.	AUCCUUAUCCUCCGUAGCCCUU
chr3B:36385040-36385637(-)	509-530	3.5	osa-miR2118c/osa-miR2118q/	22	UGGGGGUAGGAGGCACCGGGAA	:.::..::::::::: ::::::	AUCCUUAUCCUCCGUAGCCCUU
chr3B:36525550-36526086(-)	467-488	4	osa-miR2118c/osa-miR2118q/	22	UGAGAAUAGGAGACAUCGGGAG	:. ::::::::: ::::::::.	AUCCUUAUCCUCCGUAGCCCUU
chr3B:41585935-41586513(-)	509-530	3	osa-miR2118c/osa-miR2118q/	22	UAGGAAAAGGAGGCACCGGGAA	:::::: :::::::: ::::::	AUCCUUAUCCUCCGUAGCCCUU
chr3B:41641073-41641735(-)	572-593	4	osa-miR2118c/osa-miR2118q/	22	UAGGAAAAGGAGGCAUAGGGAU	:::::: ::::::::: ::::	AUCCUUAUCCUCCGUAGCCCUU
chr3B:42346092-42346839(+)	657-678	3.5	osa-miR2118c/osa-miR2118q/	22	UAGGCUCGGGAGGCAUCGGGAA	:::: .::::::::::::::	AUCCUUAUCCUCCGUAGCCCUU
chr3B:684044845-684045724(-)	781-802	3	osa-miR2118c/osa-miR2118q/	22	UAGAAUUAGGAGGCAUUGGGAA	::: : ::::::::::.:::::	AUCCUUAUCCUCCGUAGCCCUU
chr3B:684048689-684049405(-)	626-647	3	osa-miR2118c/osa-miR2118q/	22	UAGGAUUAUGAGGCGUCGGGAA	::::: :: :::::.:::::::	AUCCUUAUCCUCCGUAGCCCUU
chr3B:684051112-684052005(-)	803-824	2	osa-miR2118c/osa-miR2118q/	22	UAGAAUUAGGAGGCAUCGGGAA	::: : ::::::::::::::::	AUCCUUAUCCUCCGUAGCCCUU
chr3B:684061015-684061826(-)	721-742	3.5	osa-miR2118c/osa-miR2118q/	22	UAGGACUGCGAGGCGUCGGGAA	::::: :. :::::.:::::::	AUCCUUAUCCUCCGUAGCCCUU
chr3B:684064035-684065012(-)	866-887	3.5	osa-miR2118c/osa-miR2118q/	22	UAGGAUUGCGAGGCGUCGGGAA	::::: :. :::::.:::::::	AUCCUUAUCCUCCGUAGCCCUU
chr3B:684104178-684104971(-)	703-724	3.5	osa-miR2118c/osa-miR2118q/	22	UAGGACUGUGAGGCGUCGGGAA	::::: :. :::::.:::::::	AUCCUUAUCCUCCGUAGCCCUU
chr3B:758067250-758067825(-)	466-487	3	osa-miR2118c/osa-miR2118q/	22	UUGGACUAAGAGGCAUCGGGAA	: ::: :: :::::::::::::	AUCCUUAUCCUCCGUAGCCCUU
chr3B:758345969-758346904(-)	845-866	4	osa-miR2118c/osa-miR2118q/	22	UUGGACUAAGAGGCAUCGGGGA	: ::: :: :::::::::::.:	AUCCUUAUCCUCCGUAGCCCUU
chr3B:758816826-758817407(-)	533-554	3	osa-miR2118c/osa-miR2118q/	22	UUGGAAUAGAAGGCAUCGGGAA	: ::::::: ::::::::::::	AUCCUUAUCCUCCGUAGCCCUU
chr3B:759132976-759133575(-)	490-511	4	osa-miR2118c/osa-miR2118q/	22	UUGGAAUAGAAGGCAUUGGGAA	: ::::::: ::::::.:::::	AUCCUUAUCCUCCGUAGCCCUU
chr3B:759180132-759180710(-)	488-509	4	osa-miR2118c/osa-miR2118q/	22	CUGGAAUAGGUGGCAUCGGGAA	:::::::: :::::::::::	AUCCUUAUCCUCCGUAGCCCUU
chr3B:762776285-762776718(+)	301-322	4	osa-miR2118c/osa-miR2118q/	22	UGGGAAUGUGAGGCAUCCGGAA	:.:::::. :::::::: ::::	AUCCUUAUCCUCCGUAGCCCUU
chr3B:764127258-764127817(+)	469-490	3.5	osa-miR2118c/osa-miR2118q/	22	UAGGAAUAUGAGACAUCGGGAG	:::::::: ::: ::::::::.	AUCCUUAUCCUCCGUAGCCCUU
chr3B:764390487-764391171(+)	575-596	3	osa-miR2118c/osa-miR2118q/	22	UGGGAAUAGGAGACAUCGGGAG	:.:::::::::: ::::::::.	AUCCUUAUCCUCCGUAGCCCUU
chr3B:775632156-775632671(-)	446-467	4	osa-miR2118c/osa-miR2118q/	22	UGGGAGUUGGAGGCAUCGAGAA	:.:::.: :::::::::: :::	AUCCUUAUCCUCCGUAGCCCUU
chr3B:776045357-776046083(+)	658-679	3	osa-miR2118c/osa-miR2118q/	22	UAGGAUUAGGAGGCGUUGGGAA	::::: ::::::::.:.:::::	AUCCUUAUCCUCCGUAGCCCUU
chr3B:777656741-777657366(+)	535-556	2.5	osa-miR2118c/osa-miR2118q/	22	UAGGAGUAGGAGGCAUGGGGAA	:::::.:::::::::: :::::	AUCCUUAUCCUCCGUAGCCCUU
chr3B:778142898-778143625(-)	637-658	3	osa-miR2118c/osa-miR2118q/	22	UAGUAUUAGGAGGCAUUGGGAA	::: : ::::::::::.:::::	AUCCUUAUCCUCCGUAGCCCUU
chr3D:20559101-20559597(+)	406-427	4	osa-miR2118c/osa-miR2118q/	22	UAGGAUCAGGAGGCAUGGGGAA	::::: ::::::::: :::::	AUCCUUAUCCUCCGUAGCCCUU
chr3D:20913955-20914535(-)	490-511	4	osa-miR2118c/osa-miR2118q/	22	UAGGAGUGGGAGGCGUCAGGAA	:::::.:.::::::.:: ::::	AUCCUUAUCCUCCGUAGCCCUU
chr3D:20929975-20930511(-)	446-467	4	osa-miR2118c/osa-miR2118q/	22	UAGGAGUGGGAGGCGUCAGGAA	:::::.:.::::::.:: ::::	AUCCUUAUCCUCCGUAGCCCUU
chr3D:23763594-23764384(+)	742-763	4	osa-miR2118c/osa-miR2118q/	22	UAGGAAAAGGAGGCACCGGGGA	:::::: :::::::: ::::.:	AUCCUUAUCCUCCGUAGCCCUU
chr3D:24126793-24127516(+)	635-656	1	osa-miR2118c/osa-miR2118q/	22	UAGGAAAAGGAGGCAUCGGGAA	:::::: :::::::::::::::	AUCCUUAUCCUCCGUAGCCCUU
chr3D:24528516-24529428(+)	803-824	3	osa-miR2118c/osa-miR2118q/	22	UAGGAAAAGGAGGCACCGGGAA	:::::: :::::::: ::::::	AUCCUUAUCCUCCGUAGCCCUU
chr3D:571850774-571851376(-)	512-533	4	osa-miR2118c/osa-miR2118q/	22	UUGGAAUAGAAGGUAUCGGGAA	: ::::::: :::.::::::::	AUCCUUAUCCUCCGUAGCCCUU
chr3D:572194899-572195435(-)	446-467	3.5	osa-miR2118c/osa-miR2118q/	22	UAUGAAUGGGAGGCAUCUGGAA	:: ::::.::::::::: ::::	AUCCUUAUCCUCCGUAGCCCUU
chr3D:574256994-574257491(-)	428-449	4	osa-miR2118c/osa-miR2118q/	22	UGGGAAUAAGAGACAUCGGGAG	:.:::::: ::: ::::::::.	AUCCUUAUCCUCCGUAGCCCUU
chr3D:574712482-574713165(-)	574-595	3.5	osa-miR2118c/osa-miR2118q/	22	UAGGAAUAUGAGACAUCGGGAG	:::::::: ::: ::::::::.	AUCCUUAUCCUCCGUAGCCCUU
chr4A:583785464-583785935(-)	362-383	4	osa-miR2118c/osa-miR2118q/	22	UUGGAAUCGGUGGCAUCGGGAA	: ::::: :: :::::::::::	AUCCUUAUCCUCCGUAGCCCUU
chr4A:589800229-589800618(-)	322-343	3	osa-miR2118c/osa-miR2118q/	22	UAAGGAUGGGAGGCAUCGGGGA	:: :.::.::::::::::::.:	AUCCUUAUCCUCCGUAGCCCUU
chr4A:589838779-589839335(-)	447-468	2.5	osa-miR2118c/osa-miR2118q/	22	UAAGAAUGGGAGGCAUCGGGGA	:: ::::.::::::::::::.:	AUCCUUAUCCUCCGUAGCCCUU
chr4A:632632849-632633469(+)	530-551	4	osa-miR2118c/osa-miR2118q/	22	UGGCAAUGGGAGGCACCGGGAA	:.: :::.::::::: ::::::	AUCCUUAUCCUCCGUAGCCCUU
chr4A:632763207-632763890(+)	593-614	3.5	osa-miR2118c/osa-miR2118q/	22	UAGCAAUGGGAGGCACCGGGAA	::: :::.::::::: ::::::	AUCCUUAUCCUCCGUAGCCCUU
chr4A:632785383-632786192(+)	740-761	1.5	osa-miR2118c/osa-miR2118q/	22	UAGCAAUGGGAGGCAUCGGGAA	::: :::.::::::::::::::	AUCCUUAUCCUCCGUAGCCCUU
chr4A:632840390-632840949(+)	469-490	3.5	osa-miR2118c/osa-miR2118q/	22	UAGCAAUGGGAGGCAUCGGAAA	::: :::.::::::::::: ::	AUCCUUAUCCUCCGUAGCCCUU
chr4A:642113000-642114039(-)	972-993	4	osa-miR2118c/osa-miR2118q/	22	UAGGAAUAAGAGACAUCGGGAU	:::::::: ::: ::::::::	AUCCUUAUCCUCCGUAGCCCUU
chr4A:642881177-642882229(-)	964-985	4	osa-miR2118c/osa-miR2118q/	22	UAGGAAUAAGAGACAUCGGGAU	:::::::: ::: ::::::::	AUCCUUAUCCUCCGUAGCCCUU
chr4A:643868544-643869227(+)	637-658	4	osa-miR2118c/osa-miR2118q/	22	UAGGCAUUGGAGGUAUUGGGAA	:::: :: :::::.::.:::::	AUCCUUAUCCUCCGUAGCCCUU
chr4A:644609472-644610029(-)	426-447	4	osa-miR2118c/osa-miR2118q/	22	UAGGACUAGGAAGCAUCGGGAU	::::: ::::: :::::::::	AUCCUUAUCCUCCGUAGCCCUU
chr4A:648590065-648590652(-)	478-499	4	osa-miR2118c/osa-miR2118q/	22	UAGGAAUAGGAGGCAGCAGGAA	::::::::::::::: : ::::	AUCCUUAUCCUCCGUAGCCCUU
chr4A:650950717-650951402(-)	616-637	3	osa-miR2118c/osa-miR2118q/	22	AUGGAAUAAGAGGCAUCGGGAA	:::::: :::::::::::::	AUCCUUAUCCUCCGUAGCCCUU
chr4A:651082430-651083195(-)	677-698	4	osa-miR2118c/osa-miR2118q/	22	UUGGAAUAAGAGGCAUCGGAAA	: :::::: :::::::::: ::	AUCCUUAUCCUCCGUAGCCCUU
chr4A:666112411-666112924(+)	404-425	4	osa-miR2118c/osa-miR2118q/	22	UAGGAUUAGGAGACAUCGGGAC	::::: :::::: ::::::::	AUCCUUAUCCUCCGUAGCCCUU
chr4A:672164368-672164990(-)	533-554	1.5	osa-miR2118c/osa-miR2118q/	22	UGGGAAUAGGAGGCGUCGGGAA	:.::::::::::::.:::::::	AUCCUUAUCCUCCGUAGCCCUU
chr4A:672287724-672288115(-)	301-322	3.5	osa-miR2118c/osa-miR2118q/	22	UGGGAAUAGGAGACGUCGGGAA	:.:::::::::: :.:::::::	AUCCUUAUCCUCCGUAGCCCUU
chr4A:686927123-686927766(-)	553-574	2	osa-miR2118c/osa-miR2118q/	22	UAGGAUUAGGAGGCAUUGGGAA	::::: ::::::::::.:::::	AUCCUUAUCCUCCGUAGCCCUU
chr4A:688473523-688473977(-)	385-406	4	osa-miR2118c/osa-miR2118q/	22	UGAGAAUUGGAGGCAUUGGGAG	:. :::: ::::::::.::::.	AUCCUUAUCCUCCGUAGCCCUU
chr4A:688765106-688765780(-)	583-604	2	osa-miR2118c/osa-miR2118q/	22	UGGGAAUACGAGGCAUCGGGAG	:.:::::: ::::::::::::.	AUCCUUAUCCUCCGUAGCCCUU
chr4A:688852642-688853160(-)	428-449	2	osa-miR2118c/osa-miR2118q/	22	UGGGAAUACGAGGCAUCGGGAG	:.:::::: ::::::::::::.	AUCCUUAUCCUCCGUAGCCCUU
chr4A:692355614-692356487(-)	825-846	3.5	osa-miR2118c/osa-miR2118q/	22	UGGGAAUUGGAGGCAUCCGGAA	:.::::: ::::::::: ::::	AUCCUUAUCCUCCGUAGCCCUU
chr4A:698082432-698083223(-)	701-722	4	osa-miR2118c/osa-miR2118q/	22	UAGGACUAGGAGGCGUAGGGAA	::::: ::::::::.: :::::	AUCCUUAUCCUCCGUAGCCCUU
chr4A:698090775-698091376(-)	511-532	2.5	osa-miR2118c/osa-miR2118q/	22	UAUGACUGGGAGGCAUCGGGAA	:: :: :.::::::::::::::	AUCCUUAUCCUCCGUAGCCCUU
chr4A:698252957-698253659(+)	614-635	4	osa-miR2118c/osa-miR2118q/	22	UAUGACUAGGAGGCAUAGGGAA	:: :: :::::::::: :::::	AUCCUUAUCCUCCGUAGCCCUU
chr4A:698305252-698306045(+)	660-681	4	osa-miR2118c/osa-miR2118q/	22	UAUGACUAGGAGGCAUAGGGAA	:: :: :::::::::: :::::	AUCCUUAUCCUCCGUAGCCCUU
chr4A:698326160-698326720(+)	472-493	4	osa-miR2118c/osa-miR2118q/	22	UAUGACUAGGAGGCAUAGGGAA	:: :: :::::::::: :::::	AUCCUUAUCCUCCGUAGCCCUU
chr4A:698349750-698350287(+)	449-470	4	osa-miR2118c/osa-miR2118q/	22	UAUGACUAGGAGGCACCGGGAA	:: :: ::::::::: ::::::	AUCCUUAUCCUCCGUAGCCCUU
chr4A:698484409-698485055(+)	558-579	4	osa-miR2118c/osa-miR2118q/	22	UAUGACUAGGAGGCAUAGGGAA	:: :: :::::::::: :::::	AUCCUUAUCCUCCGUAGCCCUU
chr4A:698517002-698517475(+)	385-406	4	osa-miR2118c/osa-miR2118q/	22	UAUAAAUAGGAGGCAUAGGGAA	:: :::::::::::: :::::	AUCCUUAUCCUCCGUAGCCCUU
chr4A:698633418-698634143(+)	637-658	4	osa-miR2118c/osa-miR2118q/	22	UAUGACUAGGAGGCAUAGGGAA	:: :: :::::::::: :::::	AUCCUUAUCCUCCGUAGCCCUU
chr4A:718495294-718495956(-)	530-551	4	osa-miR2118c/osa-miR2118q/	22	UAUGACUAGGAGGCAACGGGAA	:: :: ::::::::: ::::::	AUCCUUAUCCUCCGUAGCCCUU
chr4A:718555533-718556258(-)	637-658	4	osa-miR2118c/osa-miR2118q/	22	UAUGAUUAGGAGGCAUAGGGAA	:: :: :::::::::: :::::	AUCCUUAUCCUCCGUAGCCCUU
chr4A:718884193-718884958(+)	677-698	4	osa-miR2118c/osa-miR2118q/	22	UAUGACUAGGAGGCAUAGGGAA	:: :: :::::::::: :::::	AUCCUUAUCCUCCGUAGCCCUU
chr4A:719680833-719681537(-)	614-635	3	osa-miR2118c/osa-miR2118q/	22	AGGGGAUAUGAGGCAUCGGGAA	.::.::: :::::::::::::	AUCCUUAUCCUCCGUAGCCCUU
chr4A:720959510-720960107(+)	530-551	2.5	osa-miR2118c/osa-miR2118q/	22	UGGGAAUAAGAGGCAUUGGGAA	:.:::::: :::::::.:::::	AUCCUUAUCCUCCGUAGCCCUU
chr4A:721271950-721272662(+)	645-666	3.5	osa-miR2118c/osa-miR2118q/	22	UGGGAUUAAGAGGCAUUGGGAA	:.::: :: :::::::.:::::	AUCCUUAUCCUCCGUAGCCCUU
chr4A:722047377-722048060(-)	593-614	4	osa-miR2118c/osa-miR2118q/	22	UAUGACUAGGAGGCAUAGGGAA	:: :: :::::::::: :::::	AUCCUUAUCCUCCGUAGCCCUU
chr4A:722057009-722057721(-)	572-593	4	osa-miR2118c/osa-miR2118q/	22	UAUGACUAGGAGGCAUAGGGAA	:: :: :::::::::: :::::	AUCCUUAUCCUCCGUAGCCCUU
chr4A:722125835-722126478(-)	553-574	4	osa-miR2118c/osa-miR2118q/	22	UAUGACUAGGAGGCAUGGGGAA	:: :: :::::::::: :::::	AUCCUUAUCCUCCGUAGCCCUU
chr4A:722250246-722251073(-)	736-757	4	osa-miR2118c/osa-miR2118q/	22	UAGGACUAGGAGGCAUUGGAAA	::::: ::::::::::.:: ::	AUCCUUAUCCUCCGUAGCCCUU
chr4A:723798928-723799464(-)	446-467	3.5	osa-miR2118c/osa-miR2118q/	22	UGAGAAUAGGAGGCAUCAGGAA	:. :::::::::::::: ::::	AUCCUUAUCCUCCGUAGCCCUU
chr4B:3583748-3584354(+)	163-184	3.5	osa-miR2118c/osa-miR2118q/	22	UACGAAUGUGAGGCAUUGGGAA	:: ::::. :::::::.:::::	AUCCUUAUCCUCCGUAGCCCUU
chr4D:12550357-12551171(-)	723-744	3	osa-miR2118c/osa-miR2118q/	22	UAAGCAUGGGAGGCAUCGGGAG	:: : ::.:::::::::::::.	AUCCUUAUCCUCCGUAGCCCUU
chr4D:12670776-12671207(+)	364-385	3	osa-miR2118c/osa-miR2118q/	22	UAAGGAUGGGAGGCAUCGGGGA	:: :.::.::::::::::::.:	AUCCUUAUCCUCCGUAGCCCUU
chr5A:11527957-11528587(-)	448-469	3	osa-miR2118c/osa-miR2118q/	22	UAGGCAUAGAAGGCAUCGGGAA	:::: :::: ::::::::::::	AUCCUUAUCCUCCGUAGCCCUU
chr5A:44301153-44301796(-)	553-574	3.5	osa-miR2118c/osa-miR2118q/	22	UAGGCUUCGGAGGCAUCGGGAG	:::: : :::::::::::::.	AUCCUUAUCCUCCGUAGCCCUU
chr5A:547303644-547304477(+)	743-764	3.5	osa-miR2118c/osa-miR2118q/	22	UGGGUUUAGGAGGCAUUGGGAA	:.:: ::::::::::.:::::	AUCCUUAUCCUCCGUAGCCCUU
chr5A:564329014-564329679(+)	575-596	4	osa-miR2118c/osa-miR2118q/	22	UAGGAAUAGGAGGAAUGGGGAA	::::::::::::: :: :::::	AUCCUUAUCCUCCGUAGCCCUU
chr5A:566634865-566635569(+)	635-656	3	osa-miR2118c/osa-miR2118q/	22	UAGGAAUAUGAGGUAUUGGGAA	:::::::: ::::.::.:::::	AUCCUUAUCCUCCGUAGCCCUU
chr5A:567698340-567698920(+)	490-511	4	osa-miR2118c/osa-miR2118q/	22	UAUGAAUAAGAUGCAUCGGGAA	:: ::::: :: ::::::::::	AUCCUUAUCCUCCGUAGCCCUU
chr5A:601151498-601152294(+)	705-726	3	osa-miR2118c/osa-miR2118q/	22	UAGGAAUGGGAGGCAACGGGAG	:::::::.::::::: :::::.	AUCCUUAUCCUCCGUAGCCCUU
chr5A:607623384-607624067(-)	593-614	4	osa-miR2118c/osa-miR2118q/	22	UGGGAAUGAAAGGCAUCGGGAA	:.:::::. ::::::::::::	AUCCUUAUCCUCCGUAGCCCUU
chr5A:631705505-631706270(+)	677-698	4	osa-miR2118c/osa-miR2118q/	22	UGGGCAUGGGAGGCAUGGGGAA	:.:: ::.:::::::: :::::	AUCCUUAUCCUCCGUAGCCCUU
chr5A:641114630-641115523(+)	805-826	4	osa-miR2118c/osa-miR2118q/	22	UAAGAAGAGGAGGCAUCUGGAA	:: ::: :::::::::: ::::	AUCCUUAUCCUCCGUAGCCCUU
chr5B:304275955-304276716(+)	652-673	2.5	osa-miR2118c/osa-miR2118q/	22	UGGGAAUAUGAGGCAUUGGGAA	:.:::::: :::::::.:::::	AUCCUUAUCCUCCGUAGCCCUU
chr5B:539303121-539303741(-)	530-551	4	osa-miR2118c/osa-miR2118q/	22	UAGGGCUGGGAGGCAUCAGGAA	::::. :.::::::::: ::::	AUCCUUAUCCUCCGUAGCCCUU
chr5B:544980437-544981122(+)	616-637	4	osa-miR2118c/osa-miR2118q/	22	UAUGACUAGGAGGCAUGGGGAA	:: :: :::::::::: :::::	AUCCUUAUCCUCCGUAGCCCUU
chr5B:547141415-547142141(+)	636-657	2	osa-miR2118c/osa-miR2118q/	22	UCGGAAUAGGAGGCAUUGGGAA	: ::::::::::::::.:::::	AUCCUUAUCCUCCGUAGCCCUU
chr5B:547551592-547552235(+)	553-574	3.5	osa-miR2118c/osa-miR2118q/	22	UAGGAAUGUGAGGUAUUGGGAA	:::::::. ::::.::.:::::	AUCCUUAUCCUCCGUAGCCCUU
chr5B:548141833-548142663(+)	740-761	3	osa-miR2118c/osa-miR2118q/	22	UAGGAUUUGGAGGCGUCGGGAA	::::: : ::::::.:::::::	AUCCUUAUCCUCCGUAGCCCUU
chr5B:591755826-591756427(+)	511-532	4	osa-miR2118c/osa-miR2118q/	22	UUGGAAUAAGUGGCAUCGGGAA	: :::::: : :::::::::::	AUCCUUAUCCUCCGUAGCCCUU
chr5B:598162592-598163149(-)	469-490	3.5	osa-miR2118c/osa-miR2118q/	22	UGGAAAUAGAAGGCAUCGGGAA	:.: ::::: ::::::::::::	AUCCUUAUCCUCCGUAGCCCUU
chr5B:598654645-598655349(+)	595-616	3.5	osa-miR2118c/osa-miR2118q/	22	UAGGAAUAAAAGGCAUCGGGAG	:::::::: :::::::::::.	AUCCUUAUCCUCCGUAGCCCUU
chr5B:599290548-599291189(-)	572-593	3.5	osa-miR2118c/osa-miR2118q/	22	UGAGAAUAGAAGGCAUCGGGAA	:. :::::: ::::::::::::	AUCCUUAUCCUCCGUAGCCCUU
chr5B:611526036-611526795(+)	669-690	3.5	osa-miR2118c/osa-miR2118q/	22	UGUGAAUAGAAGGCAUCGGGAA	:. :::::: ::::::::::::	AUCCUUAUCCUCCGUAGCCCUU
chr5B:611806810-611807659(+)	761-782	4	osa-miR2118c/osa-miR2118q/	22	UAAGAAUAGAGGGCAUCGGGAA	:: :::::: .:::::::::::	AUCCUUAUCCUCCGUAGCCCUU
chr5B:612117011-612117923(-)	845-866	3.5	osa-miR2118c/osa-miR2118q/	22	UGAGAAUAGGGGGCAUCGGGAU	:. :::::::.::::::::::	AUCCUUAUCCUCCGUAGCCCUU
chr5B:633849355-633849935(+)	511-532	4	osa-miR2118c/osa-miR2118q/	22	UGGGCAUGGGAGGCAUGGGGAA	:.:: ::.:::::::: :::::	AUCCUUAUCCUCCGUAGCCCUU
chr5B:633965435-633966200(+)	677-698	4	osa-miR2118c/osa-miR2118q/	22	UGGGGGUGGGAGGCAUAGGGAA	:.::..:.:::::::: :::::	AUCCUUAUCCUCCGUAGCCCUU
chr5B:634135190-634135787(-)	509-530	4	osa-miR2118c/osa-miR2118q/	22	UGGGAGUAGGAAGUAUCGGGAA	:.:::.::::: :.::::::::	AUCCUUAUCCUCCGUAGCCCUU
chr5B:643939802-643940613(+)	721-742	3	osa-miR2118c/osa-miR2118q/	22	UAGGAAGAGGAGGCAUCUGGAA	:::::: :::::::::: ::::	AUCCUUAUCCUCCGUAGCCCUU
chr5B:677924837-677925653(-)	656-677	1.5	osa-miR2118c/osa-miR2118q/	22	UAGCAAUGGGAGGCAUCGGGAA	::: :::.::::::::::::::	AUCCUUAUCCUCCGUAGCCCUU
chr5B:678034761-678035422(-)	571-592	3.5	osa-miR2118c/osa-miR2118q/	22	UAGCAAUGGGAGGCAACGGGAA	::: :::.::::::: ::::::	AUCCUUAUCCUCCGUAGCCCUU
chr5B:678141786-678142490(-)	614-635	3.5	osa-miR2118c/osa-miR2118q/	22	UAGCAAUGAGAGGCAUUGGGAA	::: :::. :::::::.:::::	AUCCUUAUCCUCCGUAGCCCUU
chr5B:678155454-678156307(-)	763-784	4	osa-miR2118c/osa-miR2118q/	22	UGGCAAUGGGAGGCACCGGGAA	:.: :::.::::::: ::::::	AUCCUUAUCCUCCGUAGCCCUU
chr5B:678161209-678162058(-)	740-761	4	osa-miR2118c/osa-miR2118q/	22	UGGCAAUGGGAGGCACCGGGAA	:.: :::.::::::: ::::::	AUCCUUAUCCUCCGUAGCCCUU
chr5D:268528108-268528956(+)	756-777	3.5	osa-miR2118c/osa-miR2118q/	22	UGGGAACAGGAGGCACCGGGAA	:.:::: :::::::: ::::::	AUCCUUAUCCUCCGUAGCCCUU
chr5D:268534057-268534676(+)	511-532	1.5	osa-miR2118c/osa-miR2118q/	22	UGGGAAUAGGAGGCAUUGGGAA	:.::::::::::::::.:::::	AUCCUUAUCCUCCGUAGCCCUU
chr5D:443016483-443017061(-)	488-509	4	osa-miR2118c/osa-miR2118q/	22	UAGGGCUGGGAGGCAUCAGGAA	::::. :.::::::::: ::::	AUCCUUAUCCUCCGUAGCCCUU
chr5D:446768752-446769456(-)	614-635	3.5	osa-miR2118c/osa-miR2118q/	22	UAGGCCUGAGAGGCAUCGGGAA	:::: :. :::::::::::::	AUCCUUAUCCUCCGUAGCCCUU
chr5D:447978060-447978830(+)	680-701	2	osa-miR2118c/osa-miR2118q/	22	UCGGAAUAGGAGGCAUUGGGAA	: ::::::::::::::.:::::	AUCCUUAUCCUCCGUAGCCCUU
chr5D:448866076-448866738(+)	572-593	4	osa-miR2118c/osa-miR2118q/	22	UAUGAAUAAGAUGCAUCGGGAA	:: ::::: :: ::::::::::	AUCCUUAUCCUCCGUAGCCCUU
chr5D:486864191-486864790(+)	509-530	4	osa-miR2118c/osa-miR2118q/	22	UAGGAAUGAAAGGCAUCGGGAG	:::::::. :::::::::::.	AUCCUUAUCCUCCGUAGCCCUU
chr5D:486893651-486894354(+)	602-623	4	osa-miR2118c/osa-miR2118q/	22	UAGGAAUGAAAGGCAUCGGGAG	:::::::. :::::::::::.	AUCCUUAUCCUCCGUAGCCCUU
chr5D:503882031-503882796(+)	677-698	4	osa-miR2118c/osa-miR2118q/	22	UGGGCAUGGGAGGCAUGGGGAA	:.:: ::.:::::::: :::::	AUCCUUAUCCUCCGUAGCCCUU
chr5D:504037909-504038550(+)	553-574	3.5	osa-miR2118c/osa-miR2118q/	22	UGAGCGUGGGAGGCAUCGGGAA	:. : .:.::::::::::::::	AUCCUUAUCCUCCGUAGCCCUU
chr5D:504720379-504720938(+)	490-511	4	osa-miR2118c/osa-miR2118q/	22	UGGGCAUGGGAGGCAUCAGGAA	:.:: ::.::::::::: ::::	AUCCUUAUCCUCCGUAGCCCUU
chr5D:512895061-512895912(+)	763-784	4	osa-miR2118c/osa-miR2118q/	22	UAAGAAGAGGAGGCAUCUGGAA	:: ::: :::::::::: ::::	AUCCUUAUCCUCCGUAGCCCUU
chr5D:513013921-513014646(+)	616-637	4	osa-miR2118c/osa-miR2118q/	22	UAGGAAGAGGAGGUAUCCGGAA	:::::: ::::::.::: ::::	AUCCUUAUCCUCCGUAGCCCUU
chr6A:24240299-24240875(+)	488-509	4	osa-miR2118c/osa-miR2118q/	22	UGGGAGUAGGAGGCGUCAGGAA	:.:::.::::::::.:: ::::	AUCCUUAUCCUCCGUAGCCCUU
chr6A:4734413-4735074(-)	552-573	4	osa-miR2118c/osa-miR2118q/	22	UAAGAAUAGGAGGCAUCGGAAU	:: :::::::::::::::: :	AUCCUUAUCCUCCGUAGCCCUU
chr6A:53888931-53889530(-)	490-511	4	osa-miR2118c/osa-miR2118q/	22	UAGGCAUUUGAGGCAUUGGGAA	:::: :: :::::::.:::::	AUCCUUAUCCUCCGUAGCCCUU
[truncated: 8,244 more rows]

## Sheet: ST5
Supplementary Table 5. The predicted target in MP with a score less than four, as determined by the Targetfinder program.
[truncated: 2,862 more rows]

[truncated: 6 more sheets: ST6, ST7, ST8, ST9, ST10, ST11]
